# Supplementary material for: Barley Root Proteome and Metabolome in Response to Cytokinin and Abiotic Stimuli
Source: Front Plant Sci. 2020 Oct 28;11:590337. doi: 10.3389/fpls.2020.590337 (PMC7673457; doi:10.3389/fpls.2020.590337)
Supplement: Supplementary Table 1 — Differentially abundant proteins in response to cytokinin or abiotic stimuli. Supplementary table to Figures 1, 3, 4 and Tables 1, 2. [file Table_1.XLSX]

## Sheet: info
Table S1. Differentially abundant proteins in response to cytokinin or abiotic stimuli. Supplementary table to Figure 2-4 and Tables 1-2.
Table S2. Results of proteome profiling. All identified proteins and peptides. Supplementary table to Figure 2 and Figure 3. Sample annotationi (Peptide level) - Cold: AL-AP; Drought: Y-AD; Cold: AK-AP; Heat: AQ-AV; Mock: M-Q; NaCl: K-H; tZ: A-F).
Table S3. Results of metabolome profiling. Supplementary table to Figure 4.

## Sheet: Table S1
					Previously reported similar response to cytokinin		tZ	Drought	Cold	Heat	Salinity	Cytokinin			Drought			Cold			Heat			Salinity
Accession	Description	Arabidopsis best match	Arabidopsis protein name (UniProt)	EC number	Proteomics	Transcriptomics						ratio	SD	p-value	ratio	SD	p-value	ratio	SD	p-value	ratio	SD	p-value	ratio	SD	p-value	Coverage [%]	# Peptides	# PSMs	# Unique Peptides	Estimated relative protein content
HORVU0Hr1G008740	Chorismate synthase	AT1G48850	Chorismate synthase, chloroplastic, EC 4.2.3.5 (5-enolpyruvylshikimate-3-phosphate phospholyase) (Protein EMBRYO DEFECTIVE 1144)	4.2.3.5			NR	NR	↓	NR	NR	1.36396	0.461793	0.0691871	1.10143	0.356315	0.516479	0.582605	0.359924	0.0473527	1.00376	0.316106	0.979249	1.60712	0.728387	0.0658797	32	8	350	8	0.000355994
HORVU0Hr1G011720	Major pollen allergen Bet v 1-B	AT1G35260	MLP-like protein 165				↑	NR	NR	NR	NR	1.36648	0.162246	0.00023747	1.3064	0.162022	0.00102074	1.08257	0.236393	0.4492	1.08507	0.150194	0.22467	1.04697	0.120021	0.393766	36	5	803	3	0.000651058
HORVU0Hr1G013850	Succinate dehydrogenase [ubiquinone] flavoprotein subunit, mitochondrial	AT5G66760	Succinate dehydrogenase [ubiquinone] flavoprotein subunit 1, mitochondrial, EC 1.3.5.1 (Flavoprotein subunit 1 of complex II, FP)	1.3.5.1			↓	NR	NR	NR	NR	0.415374	0.237193	0.0129847	0.988631	0.593689	0.966856	0.705221	0.362106	0.181896	0.934503	0.411904	0.743704	0.790759	0.417495	0.356149	25	12	425	12	0.000444308
HORVU0Hr1G016330	phenylalanine ammonia-lyase 2	AT2G37040	Phenylalanine ammonia-lyase 1, EC 4.3.1.24	4.3.1.24	Zhang et al., 2012		↑	NR	NR	↑	↑	3.40431	2.51803	0.000195359	1.64675	1.23794	0.103276	1.14345	0.928383	0.71014	2.89929	2.33346	0.00767029	2.59268	1.97655	0.0045692	13	5	239	2	0.000223181
HORVU0Hr1G017370	aspartate aminotransferase 5	AT4G31990	Aspartate aminotransferase, chloroplastic, EC 2.6.1.1 (Transaminase A)	2.6.1.1			NR	NR	↓	NR	NR	1.20497	0.334787	0.150228	1.06943	0.315984	0.619341	0.590578	0.323215	0.0351243	1.01691	0.361541	0.918166	1.224	0.351303	0.135626	28	11	509	11	0.000539468
HORVU0Hr1G018300	Chaperone protein dnaJ 3	AT3G44110	Chaperone protein dnaJ 3, AtDjA3, AtJ3				NR	NR	NR	NR	↑	1.3214	0.846796	0.328987	1.14314	0.827539	0.686108	0.772985	0.745604	0.551396	1.24797	0.855141	0.476508	2.26941	1.42886	0.00930853	8	3	123	2	0.000123229
HORVU0Hr1G019700	alpha/beta-Hydrolases superfamily protein	AT3G48700	Probable carboxylesterase 13 (AtCXE13, EC 3.1.1.1)	3.1.1.1			NR	↑	NR	NR	↑	1.97845	1.39991	0.0558376	1.99228	1.31214	0.0297379	1.12102	0.822612	0.732823	1.15266	0.798847	0.649987	2.26081	1.37761	0.00402425	40	5	252	5	0.000260834
HORVU0Hr1G021390	Vesicle-associated membrane protein-associated protein A	AT4G00170	Vesicle-associated protein 1-3 (Plant VAP homolog 13, AtPVA13) (VAMP-associated protein 1-3) [Cleaved into: Vesicle-associated protein 1-3, N-terminally processed]				NR	NR	NR	↓	NR	0.509323	0.660958	0.271614	0.748451	0.975926	0.621774	0.5413	0.617298	0.281788	0.088261	0.204194	0.0297047	0.743499	0.896318	0.592544	10	2	121	2	0.000122544
HORVU0Hr1G040340	Proteasome subunit beta type-2	AT4G14800	Proteasome subunit beta type-2-B, EC 3.4.25.1 (20S proteasome beta subunit D-2) (Proteasome component GA) (Proteasome subunit beta type-4)	3.4.25.1			↓	NR	NR	NR	NR	0.580961	0.282951	0.0200552	0.924002	0.453006	0.720355	0.916489	0.317855	0.584958	0.986776	0.438841	0.947795	0.983541	0.331703	0.914511	26	6	269	6	0.000271103
HORVU1Hr1G000080	Nucleic acid-binding, OB-fold-like protein|none|none|IPR012340	AT1G23750	Uncharacterized protein				NR	NR	↑	NR	NR	1.11849	0.443684	0.546483	1.20978	0.48786	0.327091	1.75194	0.523638	0.00106598	1.22448	0.458591	0.260567	1.46748	0.549905	0.0524723	45	4	240	4	0.000230027
HORVU1Hr1G000940	copper ion binding|none|none|none	AT4G12340	AT4g12340/T4C9_180 (Copper ion binding protein)				↓	↓	NR	↓	NR	0.243357	0.26806	0.0109801	0.359637	0.340629	0.0303483	0.704658	0.439735	0.265046	0.418227	0.338159	0.0416379	0.617351	0.423554	0.165039	20	2	234	2	0.000191689
HORVU1Hr1G001850	12-oxophytodienoate reductase 2	AT1G17990	Putative 12-oxophytodienoate reductase-like protein 2A, EC 1.3.1.-	1.3.1.-			↓	NR	↓	↓	↑	0.370655	0.24534	0.00495567	0.799665	0.414082	0.352067	0.318005	0.251266	0.00347023	0.433881	0.292613	0.0125453	1.73855	0.689428	0.00847196	28	7	438	6	0.000418977
HORVU1Hr1G003370	Caffeic acid 3-O-methyltransferase	AT5G54160	Flavone 3'-O-methyltransferase 1, AtOMT1, EC 2.1.1.42 (Acetylserotonin O-methyltransferase OMT1, EC 2.1.1.4) (Caffeate O-methyltransferase 1, EC 2.1.1.68) (Quercetin 3'-O-methyltransferase 1)	2.1.1.42			NR	NR	↓	NR	NR	1.01243	0.360745	0.939979	1.33276	0.368192	0.0579957	0.625093	0.297497	0.0243012	1.37352	0.469149	0.0936733	0.885444	0.247427	0.339835	29	6	286	5	0.000292326
HORVU1Hr1G008120	dehydroascorbate reductase 2	AT1G75270	Glutathione S-transferase DHAR2, EC 2.5.1.18 (Chloride intracellular channel homolog 2, CLIC homolog 2) (Glutathione-dependent dehydroascorbate reductase 2, AtDHAR2, CytDHAR, GSH-dependent dehydroascorbate reductase 2, EC 1.8.5.1)	2.5.1.18			NR	NR	NR	↓	NR	0.856321	0.185964	0.128249	0.943237	0.175059	0.493318	1.16721	0.34277	0.293027	0.672683	0.155418	0.0017981	0.929867	0.184576	0.425076	58	14	1938	14	0.00167317
HORVU1Hr1G008130	11S seed storage protein	AT2G28680	Cupin family protein (Legumin-like protein) (RmlC-like cupins superfamily protein)			Li et al., 2010 | Nishiyama et al., 2012	↓	NR	↓	NR	NR	0.73338	0.142557	0.00393161	0.876833	0.204121	0.219981	0.549146	0.158227	0.000244221	0.902621	0.177962	0.263537	0.822001	0.162579	0.0447851	69	16	1741	6	0.00152735
HORVU1Hr1G011930	O-methyltransferase 1	AT5G54160	Flavone 3'-O-methyltransferase 1, AtOMT1, EC 2.1.1.42 (Acetylserotonin O-methyltransferase OMT1, EC 2.1.1.4) (Caffeate O-methyltransferase 1, EC 2.1.1.68) (Quercetin 3'-O-methyltransferase 1)	2.1.1.42			NR	↑	NR	NR	NR	1.07015	0.236021	0.507096	1.50321	0.299436	0.00084349	0.847934	0.324118	0.334101	1.26879	0.268851	0.030102	0.886281	0.23385	0.32439	56	10	762	9	0.000653797
HORVU1Hr1G012140	PATATIN-like protein 4	AT2G26560	Patatin-like protein 2, AtPLP2, EC 3.1.1.- (Patatin-related phospholipase A IIalpha, pPLAIIa) (Phospholipase A IIA, AtPLAIIA)	3.1.1.-		Hoth et al. 2003 | Nishiyama et al., 2012	↑	NR	NR	NR	NR	1.61631	0.271504	0.000111144	1.20024	0.352872	0.221969	0.993622	0.210773	0.947492	1.21625	0.177335	0.0115288	0.990617	0.163414	0.90088	52	15	2257	13	0.00184295
HORVU1Hr1G015590	Glutamate--cysteine ligase B, chloroplastic	AT4G23100	Glutamate--cysteine ligase, chloroplastic, EC 6.3.2.2 (Gamma-ECS, GCS) (Gamma-glutamylcysteine synthetase) (Protein ROOT MERISTEMLESS 1, AtGCL) (Protein cadmium-sensitive 2) (Protein phytoalexin-deficient 2)	6.3.2.2			NR	NR	↓	NR	↑	0.792654	0.239481	0.127061	0.828774	0.503842	0.478891	0.381257	0.143153	0.000327726	0.833745	0.393567	0.390478	1.42267	0.401626	0.0155566	29	10	649	10	0.000629151
HORVU1Hr1G016660	Peroxidase superfamily protein	AT4G11290	Peroxidase 39, Atperox P39, EC 1.11.1.7 (ATP19a)	1.11.1.7			↑	↓	↓	↓	↓	1.36288	0.278949	0.00890565	0.651402	0.271101	0.0224499	0.480242	0.140888	8.16133e-05	0.578757	0.238243	0.00483441	0.333619	0.143165	1.39152e-05	22	5	262	5	0.000271103
HORVU1Hr1G017050	Glutathione S-transferase family protein	AT3G62760	Glutathione S-transferase F13, AtGSTF13, EC 2.5.1.18 (GST class-phi member 13)	2.5.1.18			NR	NR	NR	NR	↑	0.980807	0.15558	0.790272	0.950856	0.146801	0.482976	1.17933	0.142267	0.00892824	1.01183	0.156127	0.868042	1.80005	0.246409	1.75671e-06	79	13	2371	12	0.00192784
HORVU1Hr1G021130	Asparagine--tRNA ligase	AT5G56680	Asparagine--tRNA ligase, cytoplasmic 1, EC 6.1.1.22 (Asparaginyl-tRNA synthetase 1, AsnRS 1) (Protein EMBRYO DEFECTIVE 2755)	6.1.1.22			↓	↑	↓	↑	NR	0.578062	0.415559	0.154472	1.86108	1.15378	0.0302131	0.207027	0.30903	0.0171858	1.67196	0.999348	0.0496058	0.729987	0.704659	0.467335	6	2	74	2	8.69447e-05
HORVU1Hr1G021140	Glutathione S-transferase family protein	AT3G62760	Glutathione S-transferase F13, AtGSTF13, EC 2.5.1.18 (GST class-phi member 13)	2.5.1.18			NR	NR	NR	NR	↑	1.18262	0.139038	0.00888836	0.831234	0.159827	0.0484349	1.09762	0.176809	0.232486	1.01784	0.119592	0.742911	1.53809	0.166016	2.36371e-06	46	7	1289	7	0.00102417
HORVU1Hr1G021150	Glutathione S-transferase family protein	AT3G62760	Glutathione S-transferase F13, AtGSTF13, EC 2.5.1.18 (GST class-phi member 13)	2.5.1.18			NR	NR	NR	NR	↑	1.0504	0.287759	0.69353	0.88897	0.325664	0.485499	1.13114	0.331478	0.36293	1.01377	0.24565	0.901512	1.4678	0.392692	0.00608574	34	6	1209	5	0.00096803
HORVU1Hr1G021180	Glutathione S-transferase family protein	AT2G02930	Glutathione S-transferase F3, AtGSTF3, EC 2.5.1.18 (GST class-phi member 3) (Glutathione S-transferase 16)	2.5.1.18			NR	NR	↑	NR	↑	1.13851	0.340885	0.345343	0.924979	0.322442	0.628461	1.35396	0.402095	0.0381393	1.19542	0.31756	0.139749	1.93316	0.519835	6.13997e-05	27	5	938	3	0.000727049
HORVU1Hr1G021780	Rubber elongation factor protein (REF)|none|PF05755|IPR008802	AT3G05500	REF/SRPP-like protein At3g05500				NR	NR	NR	↓	NR	0.809941	0.382546	0.324236	0.993866	0.375398	0.971652	0.940934	0.312162	0.691699	0.566914	0.233898	0.0112099	1.04008	0.325731	0.783643	39	9	497	9	0.000491545
HORVU1Hr1G022750	Importin subunit alpha-1b	AT1G02690	Importin subunit alpha-6, IMPa-6				NR	NR	NR	↑	NR	1.82096	1.32791	0.0746752	1.55003	1.25156	0.249965	0.795102	0.872184	0.640547	2.32319	1.50628	0.00237352	1.23446	1.07018	0.60032	27	9	261	8	0.000280003
HORVU1Hr1G023660	ubiquitin 5	AT1G23410	Ubiquitin-40S ribosomal protein S27a-1 [Cleaved into: Ubiquitin; 40S ribosomal protein S27a-1]				↓	NR	NR	NR	NR	0.706021	0.125397	0.00150139	0.859649	0.147913	0.0788298	1.0407	0.162794	0.579726	0.928109	0.132845	0.278594	1.02788	0.144907	0.669973	44	13	2105	6	0.00171836
HORVU1Hr1G024710	60S ribosomal protein L10-2	AT1G66580	60S ribosomal protein L10-3				NR	NR	NR	↑	NR	0.503661	0.450405	0.167178	2.00634	1.58978	0.0574416	1.3455	1.29062	0.510729	2.72725	2.0015	0.00283439	1.78034	1.34752	0.0783107	18	4	221	4	0.000225235
HORVU1Hr1G028030	NAD-dependent malic enzyme 1	AT1G79750	NADP-dependent malic enzyme 4, chloroplastic, AtNADP-ME4, NADP-malic enzyme 4, EC 1.1.1.40	1.1.1.40			NR	NR	NR	↑	↑	1.20479	0.456961	0.265994	1.194	0.520456	0.373056	0.86282	0.506264	0.580862	1.43093	0.528511	0.0299935	1.48628	0.62864	0.0509477	38	15	1548	13	0.00134114
HORVU1Hr1G028820	50S ribosomal protein L5	AT2G42740	60S ribosomal protein L11-1 (L16A)				↓	NR	NR	NR	NR	0.391403	0.293254	0.00800942	1.36667	0.692089	0.220118	1.05286	0.588928	0.842536	1.84717	1.07801	0.0768828	1.12221	0.429543	0.50841	23	5	315	5	0.000329294
HORVU1Hr1G042220	40S ribosomal protein S17-4	AT5G04800	40S ribosomal protein S17-4				↓	NR	NR	NR	↑	0.643487	0.143193	0.00205888	0.960772	0.240219	0.727527	1.29691	0.292065	0.0269487	1.01439	0.259422	0.903156	1.34762	0.297186	0.0122135	47	9	1276	9	0.00106456
HORVU1Hr1G043820	alpha-galactosidase 2	AT3G56310	Alpha-galactosidase 3, AtAGAL3, EC 3.2.1.22 (Alpha-D-galactoside galactohydrolase 3) (Melibiase)	3.2.1.22			NR	↓	NR	NR	↓	1.01898	0.248957	0.867218	0.668081	0.300344	0.0418793	0.713887	0.414637	0.164297	0.797893	0.328952	0.21306	0.456446	0.109741	2.65171e-05	28	11	327	11	0.000350517
HORVU1Hr1G043910	Plant basic secretory protein (BSP) family protein|none|PF04450|IPR007541	AT2G15130	Plant basic secretory protein (BSP) family protein				↑	NR	NR	NR	NR	1.7242	0.421071	0.00144251	1.09976	0.198301	0.26197	1.03475	0.181671	0.671389	0.914564	0.286181	0.52735	1.04191	0.162295	0.563895	62	13	1630	13	0.00141439
HORVU1Hr1G043920	Plant basic secretory protein (BSP) family protein|none|PF04450|IPR007541	AT2G15220	Uncharacterized protein			Nishiyama et al., 2012 | Bahargava et al., 2013	↑	NR	NR	NR	NR	1.43636	0.47448	0.0332772	1.10597	0.427819	0.57666	1.16837	0.557484	0.498376	0.733101	0.316198	0.128708	1.05818	0.312025	0.673128	67	11	976	10	0.000887246
HORVU1Hr1G045630	membrane steroid binding protein 1|none|PF00173|IPR001199	AT5G52240	Membrane steroid-binding protein 1, AtMP1 (Membrane-associated progesterone-binding protein 5, AtMAPR5)				↓	NR	↓	NR	↓	0.42496	0.300129	0.0185872	0.988163	0.584102	0.964924	0.457413	0.262977	0.0180909	0.648934	0.375962	0.129699	0.506609	0.327114	0.0389181	36	4	174	4	0.000177312
HORVU1Hr1G045720	NAD-dependent malic enzyme 2	AT4G00570	NAD-dependent malic enzyme 2, mitochondrial, AtNAD-ME2, NAD-malic enzyme 2, EC 1.1.1.39	1.1.1.39			NR	NR	↓	NR	NR	1.26135	1.45631	0.658518	1.1422	1.30918	0.798404	0.00364063	0.00326194	0.0321782	0.235717	0.425066	0.108242	0.715481	0.80398	0.546354	16	6	76	6	9.10523e-05
HORVU1Hr1G049190	Glutathione S-transferase family protein	AT1G59670	Glutathione S-transferase U15, AtGSTU15, EC 2.5.1.18 (GST class-tau member 15)	2.5.1.18			NR	NR	NR	NR	↑	1.19507	2.19199	0.837074	0.127717	0.308198	0.120577	0.259462	0.637447	0.215627	1.0214	1.44715	0.973933	13.6495	15.4215	7.54717e-07	43	5	187	5	0.000170466
HORVU1Hr1G050740	NADH-ubiquinone oxidoreductase 12 kDa subunit, mitochondrial|none|none|IPR020163	AT3G18410	NADH dehydrogenase [ubiquinone] 1 beta subcomplex subunit 10-B				NR	NR	NR	↓	↓	0.868834	0.366388	0.45717	0.843328	0.464365	0.478963	1.07342	0.354301	0.645154	0.61343	0.229629	0.0109953	0.634919	0.28918	0.0316365	12	2	198	2	0.000195112
HORVU1Hr1G052430	Chitinase family protein	AT3G12500	Basic endochitinase B, EC 3.2.1.14 (Pathogenesis-related protein 3, AtChiB, PR-3)	3.2.1.14			NR	NR	NR	↓	NR	1.1994	0.236808	0.06494	1.14065	0.235526	0.184701	1.13341	0.231094	0.198974	0.696367	0.280264	0.0472016	0.958975	0.195142	0.6558	45	10	1018	10	0.000922161
HORVU1Hr1G054240	expansin B2	AT1G65680	Putative expansin-B2, At-EXPB2, AtEXPB2 (Ath-ExpBeta-1.4) (Beta-expansin-2)				↑	↑	NR	NR	NR	35.7281	78.0718	7.70889e-06	4.15487	9.2956	0.0477435	1.82891	4.8051	0.604908	2.31461	6.21347	0.505055	1.70008	4.45612	0.646333	23	5	77	4	8.21524e-05
HORVU1Hr1G057680	beta-1,3-glucanase_putative	AT3G57260	Glucan endo-1,3-beta-glucosidase, acidic isoform, EC 3.2.1.39 ((1->3)-beta-glucan endohydrolase, (1->3)-beta-glucanase) (Beta-1,3-endoglucanase) (Beta-1,3-glucanase 2, AtBG2) (Pathogenesis-related protein 2, PR-2)	3.2.1.39		Argyros et al. 2008	↓	NR	NR	↓	NR	0.234311	0.199341	0.00227697	0.694044	0.350674	0.155738	0.843122	0.405059	0.457739	0.547209	0.320217	0.0492032	1.09577	0.520243	0.672193	43	8	687	8	0.000622989
HORVU1Hr1G057970	nascent polypeptide-associated complex subunit alpha-like protein 3|none|PF01849|IPR002715, IPR016641	AT3G12390	Nascent polypeptide-associated complex subunit alpha-like protein 1, NAC-alpha-like protein 1 (Alpha-NAC-like protein 1)				↓	↓	NR	↓	↓	0.194671	0.222834	0.000905615	0.490562	0.417816	0.0472243	0.73008	0.371383	0.192534	0.381802	0.365241	0.0150048	0.538061	0.330193	0.036407	36	5	144	5	0.00015472
HORVU1Hr1G059570	60S ribosomal protein L29-1	AT3G06700	60S ribosomal protein L29-1				NR	NR	↑	NR	NR	0.851314	0.48227	0.526603	0.928136	0.468148	0.745224	1.48456	0.480652	0.0119445	0.66257	0.280736	0.0613444	0.989094	0.402604	0.953167	33	3	214	3	0.000200589
HORVU1Hr1G059960	methionine aminopeptidase 2B|none|PF00557|IPR000994, IPR001714, IPR004545, IPR011991	AT3G51800	ERBB-3 BINDING PROTEIN 1, AtEBP1 (Proliferation-associated protein G2p, AtG2) (Protein CELL-PROLIFERATION-RELATED, AtCPR)				NR	NR	↓	NR	NR	0.732592	0.274586	0.0677738	0.868371	0.185359	0.169914	0.709171	0.225108	0.0252793	1.04339	0.266083	0.719394	0.846851	0.252751	0.224365	33	9	547	9	0.000533991
HORVU1Hr1G062110	Endo-1,3;1,4-beta-D-glucanase	AT3G23600	DLH domain-containing protein				NR	NR	NR	↓	NR	1.40699	0.798946	0.225363	1.12975	0.696003	0.672604	1.39103	0.64267	0.127758	0.18677	0.149397	0.00112422	1.14998	0.544944	0.517679	14	4	182	3	0.000192374
HORVU1Hr1G066240	NAD(P)H dehydrogenase (quinone)	AT5G54500	NAD(P)H dehydrogenase (quinone) FQR1, EC 1.6.5.2 (Flavodoxin-like quinone reductase 1)	1.6.5.2			↓	↓	NR	NR	NR	0.640276	0.164012	0.000977684	0.635244	0.22428	0.00563186	0.881538	0.210984	0.244539	0.777126	0.139116	0.0070644	0.891849	0.134734	0.113337	33	8	925	6	0.000822209
HORVU1Hr1G067300	phosphoglycerate kinase 1	AT1G56190	Phosphoglycerate kinase 2, chloroplastic, EC 2.7.2.3	2.7.2.3			NR	NR	NR	NR	↑	1.04378	0.326411	0.762213	0.945264	0.362036	0.750285	0.824526	0.328267	0.309736	1.0031	0.357617	0.984877	1.37614	0.438791	0.0343566	24	8	467	7	0.000392278
HORVU1Hr1G069530	ubiquitin-conjugating enzyme 11|none|PF00179|IPR000608, IPR016135, IPR023313	AT4G27960	SUMO-conjugating enzyme UBC9, EC 2.3.2.- (RING-type E3 SUMO transferase UBC9) (UBCAT4B) (Ubiquitin carrier protein 9) (Ubiquitin-conjugating enzyme E2 9) (Ubiquitin-conjugating enzyme E2-17 kDa) (Ubiquitin-protein ligase 9)	2.3.2.-			NR	NR	NR	↑	NR	1.18575	0.738019	0.527326	1.30826	0.9018	0.380191	1.03349	0.812173	0.92702	1.68968	1.01536	0.031423	1.39253	1.04464	0.338337	28	4	493	3	0.000411447
HORVU1Hr1G070310	Aldose reductase	AT2G37760	Aldo-keto reductase family 4 member C8, EC 1.1.1.-	1.1.1.-			↓	↓	NR	↓	NR	0.464167	0.19768	0.00588902	0.594195	0.296253	0.0428449	0.852554	0.288321	0.345127	0.274827	0.130061	0.000639422	0.657883	0.573455	0.246459	16	4	262	4	0.000262203
HORVU1Hr1G072220	Heat shock 70 kDa protein|none|PF00012|IPR013126, IPR018181, IPR029047, IPR029048	AT3G09440	Heat shock 70 kDa protein 3 (Heat shock cognate 70 kDa protein 3) (Heat shock cognate protein 70-3, AtHsc70-3) (Heat shock protein 70-3, AtHsp70-3)				NR	NR	↑	NR	NR	1.05973	0.132931	0.328557	1.11391	0.166014	0.145769	1.35433	0.197007	0.00151505	1.1188	0.0993675	0.015485	0.978902	0.0971518	0.642189	62	32	5049	5	0.00415075
HORVU1Hr1G074340	Histone superfamily protein	AT1G09200	Histone H3.2 (Histone H3.1)				↑	NR	NR	NR	NR	1.34656	0.271264	0.0119708	1.07404	0.234243	0.488719	1.1783	0.3018	0.205044	1.04909	0.16976	0.523952	1.01763	0.180101	0.830097	38	8	2648	3	0.00198877
HORVU1Hr1G076190	Chaperone protein ClpB	AT1G74310	Chaperone protein ClpB1 (ATP-dependent Clp protease ATP-binding subunit ClpB homolog 1) (Casein lytic proteinase B1) (Heat shock protein 101) (Protein DEFECTIVE IN LONG-TERM ACQUIRED THERMOTOLERANCE)				NR	NR	↑	NR	NR	0.0410827	0.0880898	0.340893	0.824584	2.48907	0.890163	23.5916	51.6278	0.000733333	0.0410827	0.0880898	0.340893	0.0410827	0.0880898	0.340893	15	7	29	7	3.69686e-05
HORVU1Hr1G078500	chr1H:520489408-520491407 HC_U|unknown function|none|none|none	AT2G20290	Myosin-13 (Myosin XI G, AtXIG)				NR	NR	↑	NR	NR	0.719229	0.276684	0.0601097	1.01192	0.420218	0.950599	1.44041	0.31535	0.00477877	0.941669	0.196125	0.534438	1.19505	0.204788	0.0349347	81	13	1223	13	0.00109605
HORVU1Hr1G079290	Late embryogenesis abundant protein 76|none|PF02987|IPR004238	N/A	N/A				NR	NR	↑	NR	NR	0.781688	0.232153	0.126392	1.28321	0.570293	0.252828	1.4003	0.45864	0.0333388	0.714512	0.239435	0.067979	1.02516	0.411129	0.892538	73	22	3407	20	0.00279044
HORVU1Hr1G080320	aldehyde dehydrogenase 12A1	AT5G62530	Delta-1-pyrroline-5-carboxylate dehydrogenase 12A1, mitochondrial, AtP5CDH, P5C dehydrogenase, EC 1.2.1.88 (Aldehyde dehydrogenase family 12 member A1) (L-glutamate gamma-semialdehyde dehydrogenase)	1.2.1.88			NR	NR	↓	↑	NR	0.817775	0.348003	0.330088	1.37599	0.588197	0.12048	0.562836	0.34014	0.0500905	1.6712	0.636757	0.0076549	0.906402	0.391495	0.626095	44	15	433	15	0.000494969
HORVU1Hr1G080480	6-phosphogluconate dehydrogenase, decarboxylating 1	AT1G64190	6-phosphogluconate dehydrogenase, decarboxylating 1, chloroplastic, EC 1.1.1.44	1.1.1.44			↓	↓	↓	NR	NR	0.601675	0.155074	0.0037076	0.512145	0.138198	0.00097128	0.569067	0.259777	0.0127609	1.13635	0.333399	0.349611	0.824328	0.222183	0.155652	44	16	1021	14	0.000964607
HORVU1Hr1G080980	Hyaluronan / mRNA binding family|none|PF04774, PF09598|IPR006861, IPR019084	AT4G17520	RGG repeats nuclear RNA binding protein B				↓	NR	↑	NR	NR	0.410899	0.191116	0.00143215	0.78348	0.335855	0.222198	1.48099	0.545436	0.0442237	0.888797	0.319952	0.482568	0.843858	0.307021	0.324044	41	10	795	10	0.000742795
HORVU1Hr1G081280	tubulin alpha-4 chain	AT4G14960	Tubulin alpha-6 chain		Zhang et al., 2012		↑	NR	NR	NR	NR	1.6183	0.546763	0.00538803	1.31072	0.517941	0.154501	0.664852	0.544048	0.231679	1.38271	0.794892	0.27518	0.827911	0.417572	0.412791	32	8	822	5	0.00073458
HORVU1Hr1G082820	chr1H:530530344-530532944 HC_U|unknown function|none|none|none	AT3G53040	Late embryogenesis abundant protein At3g53040 (LEA domain-containing protein At3g53040)				↓	NR	NR	↓	NR	0.674881	0.223613	0.0408075	0.752559	0.277852	0.131935	0.78407	0.241488	0.140134	0.646211	0.242261	0.0367015	0.831788	0.311736	0.308983	48	26	2282	26	0.00203738
HORVU1Hr1G083470	5-dehydro-2-deoxygluconokinase	AT4G10260	Probable fructokinase-5, EC 2.7.1.4	2.7.1.4			↑	NR	NR	NR	NR	1.38143	0.487254	0.0482553	0.876967	0.312466	0.448149	1.02777	0.409949	0.880566	1.38566	0.513366	0.0621404	1.18719	0.444378	0.313115	31	13	1246	2	0.00113233
HORVU1Hr1G084970	dynamin-like protein	AT5G42080	Dynamin-related protein 1A (Dynamin-like protein 1) (Dynamin-like protein A) (Protein RADIAL SWELLING 9)				NR	NR	NR	↑	NR	1.548	1.10202	0.163504	1.42942	1.09926	0.307387	0.746731	0.766329	0.531027	2.15045	1.37386	0.00348539	1.32751	0.96942	0.381224	33	15	416	15	0.000455261
HORVU1Hr1G087070	DnaJ homolog subfamily B member 13	AT2G20560	J domain-containing protein				↓	↓	↑	NR	NR	0.151516	0.329356	0.0015746	0.241772	0.343785	0.00363234	6.96585	2.77421	3.10023e-05	0.386866	0.86026	0.159924	1.15265	1.33705	0.802085	35	5	103	5	0.000106114
HORVU1Hr1G088560	GDP-D-mannose 3',5'-epimerase	AT5G28840	GDP-mannose 3,5-epimerase, GDP-Man 3,5-epimerase, EC 5.1.3.18	5.1.3.18	Liu et al., 2013	Hoth et al. 2003	↓	NR	NR	NR	NR	0.307165	0.2342	0.00114178	1.60252	0.83572	0.109502	0.695661	0.447508	0.191974	1.45381	1.36338	0.464524	1.30082	0.556245	0.217151	38	11	129	7	0.000165674
HORVU1Hr1G089380	Subtilisin-like protease	AT1G32960	Subtilisin-like protease SBT3.3, EC 3.4.21.- (Subtilase subfamily 3 member 3, AtSBT3.3)	3.4.21.-			↓	NR	↓	↓	↓	0.484723	0.172319	0.000217155	0.903659	0.286767	0.477312	0.417325	0.246627	0.000732066	0.355895	0.227689	0.000221579	0.443405	0.271574	0.00173821	9	4	159	4	0.000169097
HORVU1Hr1G089830	Dehydrogenase/reductase SDR family member 12	AT1G01800	Uncharacterized protein				NR	NR	↓	NR	↑	1.08434	0.690854	0.782792	0.607885	0.524247	0.193944	0.21529	0.352307	0.0101351	1.0898	0.783469	0.796999	2.15181	1.30442	0.0277062	20	4	137	4	0.000151297
HORVU1Hr1G090720	malate dehydrogenase	AT1G53240	Malate dehydrogenase 1, mitochondrial, EC 1.1.1.37 (Mitochondrial MDH1, mMDH1) (Mitochondrial NAD-dependent malate dehydrogenase 1, mNAD-MDH 1, mtNAD-MDH1)	1.1.1.37	Liu et al., 2011		↑	NR	↑	NR	NR	1.58085	0.402528	0.00126331	1.01298	0.258652	0.911983	1.4935	0.382648	0.00341868	1.31454	0.354758	0.0399422	0.975243	0.273497	0.846156	23	3	886	3	0.000705142
HORVU1Hr1G093480	tryptophan synthase alpha chain	AT4G02610	Tryptophan synthase alpha chain, EC 4.2.1.20 (Indole synthase) (Indole-3-glycerol-phosphate lyase, EC 4.1.2.8)	4.2.1.20			NR	NR	NR	NR	↑	0.701135	0.375104	0.141601	0.95589	0.482751	0.844131	0.980926	0.545566	0.93949	0.632378	0.376378	0.0832726	1.7398	0.64567	0.0106301	38	8	273	8	0.000310125
HORVU1Hr1G094100	Hyaluronan / mRNA binding family|none|PF04774, PF09598|IPR006861, IPR019084	AT5G47210	RGG repeats nuclear RNA binding protein C				NR	NR	↑	NR	NR	0.680839	0.456695	0.209733	0.646398	0.350584	0.110685	1.71295	0.850781	0.0395347	1.05316	0.626209	0.850345	1.01714	0.557039	0.946073	21	6	316	6	0.000317656
HORVU1Hr1G095060	U6 snRNA-associated Sm-like protein LSm8|none|PF01423|IPR001163, IPR010920	AT1G65700	Sm-like protein LSM8, AtLSM8 (U6 snRNA-associated Sm-like protein LSM8)				NR	NR	↓	↓	↓	0.776944	0.181483	0.0367431	0.827236	0.195712	0.102541	0.588406	0.161816	0.00121409	0.592176	0.160283	0.0012313	0.712487	0.200328	0.0185777	21	2	469	2	0.000386801
HORVU2Hr1G001600	Pyruvate dehydrogenase E1 component subunit alpha	AT1G01090	Pyruvate dehydrogenase E1 component subunit alpha-3, chloroplastic, EC 1.2.4.1	1.2.4.1			NR	NR	NR	NR	↑	0.779527	0.39361	0.303369	0.720454	0.330007	0.162731	0.844015	0.316436	0.369724	0.965092	0.462576	0.872001	1.5479	0.64361	0.0288991	30	8	293	8	0.000312864
HORVU2Hr1G003110	Ectonucleoside triphosphate diphosphohydrolase 5	AT3G04080	Apyrase 1, AtAPY1, EC 3.6.1.5 (ATP-diphosphatase) (ATP-diphosphohydrolase) (Adenosine diphosphatase, ADPase) (NTPDase) (Nucleoside triphosphate diphosphohydrolase 1)	3.6.1.5	Zhang et al., 2012		↑	NR	↓	NR	NR	1.34706	0.285488	0.00532858	1.21542	0.431633	0.265336	0.712513	0.208544	0.0290683	0.982	0.293994	0.894706	0.852037	0.220997	0.206977	29	8	874	8	0.00078661
HORVU2Hr1G004230	12-oxophytodienoate reductase 2	AT1G09400	Putative 12-oxophytodienoate reductase-like protein 1, EC 1.3.1.-	1.3.1.-			NR	NR	NR	NR	↑	1.14679	0.327538	0.305856	1.11406	0.339299	0.44701	1.28352	0.364299	0.0756933	1.01959	0.29724	0.884582	1.87827	0.447961	4.45873e-05	40	11	862	9	0.000812625
HORVU2Hr1G006250	Dihydrolipoyllysine-residue succinyltransferase component of 2-oxoglutarate dehydrogenase complex	N/A	N/A				↓	NR	NR	NR	NR	0.674646	0.211178	0.0167971	0.747544	0.259296	0.0789969	0.868464	0.189475	0.195083	0.822049	0.19202	0.101511	0.846774	0.193226	0.14759	37	11	1020	9	0.000908469
HORVU2Hr1G006280	Phosphoglycerate mutase family protein|none|PF00300|IPR013078, IPR029033	AT5G64460	Phosphoglycerate mutase-like protein 1				NR	↑	NR	NR	NR	1.33997	0.691887	0.223139	1.54379	0.720792	0.0452691	1.53566	0.80263	0.0915093	1.10388	0.575312	0.677213	1.49366	0.735647	0.0837834	35	6	209	6	0.000236188
HORVU2Hr1G015980	Nicotianamine synthase 9	AT1G09240	Nicotianamine synthase 3, EC 2.5.1.43 (S-adenosyl-L-methionine:S-adenosyl-L-methionine:S-adenosyl-methionine 3-amino-3-carboxypropyltransferase 3, AtNAS3)	2.5.1.43			NR	NR	↓	NR	NR	1.11177	0.658854	0.704487	0.636171	0.508885	0.180748	0.321905	0.266958	0.00372877	1.59704	0.752512	0.0631461	1.11285	0.679949	0.710961	29	6	223	6	0.000227973
HORVU2Hr1G018520	Peroxidase superfamily protein	AT1G14540	Peroxidase 4, Atperox P4, EC 1.11.1.7 (ATP46)	1.11.1.7			NR	NR	NR	NR	↓	0.92466	0.314326	0.619824	0.85441	0.311328	0.358913	1.27068	0.446459	0.160083	1.04461	0.530466	0.853055	0.632881	0.235062	0.0234871	27	6	578	4	0.000551106
HORVU2Hr1G020270	xylose isomerase family protein	AT5G57655	Xylose isomerase, EC 5.3.1.5	5.3.1.5			NR	↓	↓	NR	↓	0.642306	0.248878	0.0521137	0.595984	0.246122	0.0349005	0.159745	0.144235	0.000474983	0.831182	0.492989	0.491742	0.605771	0.231223	0.033822	42	14	508	14	0.000539468
HORVU2Hr1G020690	Nucleolar protein 58|none|PF01798, PF08156|IPR002687, IPR012974, IPR012976	AT3G05060	Probable nucleolar protein 5-2 (MAR-binding NOP56/58 homolog 2) (Nucleolar protein 58-2)				NR	NR	NR	↑	NR	0.768851	0.53596	0.403815	1.86544	1.194	0.0863768	0.804451	1.03586	0.689307	2.60771	1.16998	0.000337045	1.28211	0.816498	0.421111	18	5	190	5	0.000203327
HORVU2Hr1G024280	Peroxidase superfamily protein	AT1G14540	Peroxidase 4, Atperox P4, EC 1.11.1.7 (ATP46)	1.11.1.7			NR	NR	NR	NR	↓	1.10459	0.0836398	0.0146634	0.94748	0.146869	0.44577	1.03249	0.272493	0.794923	1.07784	0.124001	0.183978	0.704934	0.0843928	3.39324e-05	55	11	2731	7	0.00217156
HORVU2Hr1G028720	Chymotrypsin inhibitor	N/A	N/A				NR	NR	NR	↓	↓	0.917971	0.381277	0.658187	0.782863	0.646152	0.489553	1.11399	0.571255	0.652229	0.367301	0.215885	0.00337897	0.611383	0.270057	0.0417151	44	3	314	3	0.000271788
HORVU2Hr1G029870	Phospho-2-dehydro-3-deoxyheptonate aldolase 2, chloroplastic	AT1G22410	Phospho-2-dehydro-3-deoxyheptonate aldolase, EC 2.5.1.54	2.5.1.54			↑	↑	NR	NR	↑	1.63708	0.386439	0.00101671	1.42764	0.307159	0.00325535	0.82587	0.548681	0.500948	1.55451	0.634517	0.0651634	1.60215	0.372569	0.00116044	42	17	1013	17	0.00100568
HORVU2Hr1G029890	40S ribosomal protein S6	AT5G10360	40S ribosomal protein S6-2 (Protein EMBRYO DEFECTIVE 3010)		Černý et al., 2013		↓	NR	NR	NR	NR	0.596271	0.252291	0.0288969	1.16362	0.442754	0.384883	0.874611	0.409503	0.534771	1.06441	0.53206	0.787435	1.00484	0.336286	0.974846	25	5	694	2	0.000593551
HORVU2Hr1G040570	Pyruvate kinase family protein	AT5G08570	Pyruvate kinase, EC 2.7.1.40	2.7.1.40			NR	NR	NR	↑	NR	0.960308	0.654318	0.898054	1.78571	1.79156	0.285295	0.985097	1.13881	0.977324	2.97892	2.48064	0.0355407	1.42707	0.971486	0.234894	29	7	239	4	0.00024988
HORVU2Hr1G043900	Xylanase inhibitor protein 1	AT5G24090	Acidic endochitinase, EC 3.2.1.14	3.2.1.14			NR	NR	NR	NR	↓	1.30019	0.387076	0.090437	1.17159	0.305209	0.208774	1.35164	0.468452	0.104299	0.830308	0.315477	0.27759	0.519151	0.146583	0.00045596	35	8	685	8	0.000615459
HORVU2Hr1G048070	Protein phosphatase 2C family protein	AT2G20630	Probable protein phosphatase 2C 20, AtPP2C20, EC 3.1.3.16 (AtPPC3;1.2)	3.1.3.16			NR	NR	NR	NR	↑	1.17127	0.397448	0.329978	0.914726	0.313958	0.571989	0.833646	0.245979	0.205174	0.938417	0.347377	0.706715	1.40009	0.323457	0.00399318	61	11	553	11	0.000561375
HORVU2Hr1G056360	Thioredoxin superfamily protein	AT3G51030	Thioredoxin H1, AtTrxh1 (Thioredoxin 1, AtTRX1)				NR	NR	↑	NR	NR	0.245039	0.584142	0.147813	1.85328	2.33327	0.320229	2.48839	2.35923	0.00882084	0.473135	0.578153	0.268014	0.813301	0.93461	0.707349	42	3	100	3	0.000102691
HORVU2Hr1G056740	small nuclear ribonucleoprotein associated protein B|none|PF01423|IPR001163, IPR010920	AT4G20440	Small nuclear ribonucleoprotein-associated protein				↓	NR	NR	NR	NR	0.676129	0.203965	0.0142877	0.917521	0.286118	0.546207	1.25125	0.391055	0.155718	0.783395	0.252725	0.111215	1.01495	0.383657	0.932048	26	3	262	3	0.000253303
HORVU2Hr1G057430	30S ribosomal protein S19	AT1G04270	40S ribosomal protein S15-1				NR	NR	↑	NR	NR	0.92307	0.183606	0.386724	0.98278	0.267163	0.888693	1.42938	0.213999	0.000209277	1.11924	0.207898	0.207252	1.17958	0.224597	0.0847697	44	5	3142	5	0.00229068
HORVU2Hr1G068270	3-oxoacyl-[acyl-carrier-protein] reductase 4	AT1G24360	3-oxoacyl-[acyl-carrier-protein] reductase, chloroplastic, EC 1.1.1.100 (3-ketoacyl-acyl carrier protein reductase)	1.1.1.100			NR	NR	↓	↓	NR	0.753999	0.249624	0.0733138	0.83607	0.425825	0.420737	0.629024	0.198767	0.00632175	0.71019	0.167285	0.0109453	0.870812	0.192796	0.201367	39	6	242	6	0.000243719
HORVU2Hr1G070090	2-oxoglutarate dehydrogenase, E1 component	AT5G65750	Uncharacterized protein				↓	NR	↓	NR	NR	0.645534	0.1502	0.00318121	1.05327	0.275051	0.666445	0.457489	0.336817	0.00886214	0.979914	0.226038	0.848428	0.793696	0.224433	0.0956159	6	5	219	5	0.000195797
HORVU2Hr1G077220	12-oxophytodienoate reductase 2	AT1G09400	Putative 12-oxophytodienoate reductase-like protein 1, EC 1.3.1.-	1.3.1.-			↑	NR	NR	NR	↑	1.89924	1.06587	0.00692736	1.22484	0.91405	0.557125	1.4063	0.95971	0.278027	1.01393	0.814668	0.970055	3.45155	2.14205	0.000732441	32	7	171	6	0.000167043
HORVU2Hr1G077710	22.0 kDa class IV heat shock protein|none|PF00011|IPR002068, IPR008978	AT4G10250	22.0 kDa heat shock protein, AtHsp22.0				NR	NR	↑	NR	NR	22.0217	47.0059	0.340893	1	0	NS	6685.71	810.105	4.71197e-09	1	0	NS	19.9087	42.2812	0.340893	59	10	302	10	0.000249196
HORVU2Hr1G079840	Lipase/lipooxygenase, PLAT/LH2 family protein	AT4G39730	PLAT domain-containing protein 1, AtPLAT1, PLAT domain protein 1				NR	NR	↑	NR	NR	1.11731	0.337693	0.422752	1.0599	0.392387	0.733413	1.48985	0.425759	0.00697951	1.13361	0.322601	0.332918	0.892957	0.272456	0.435773	29	5	454	4	0.000403232
HORVU2Hr1G080630	14-3-3-like protein GF14-B	AT3G02520	14-3-3-like protein GF14 nu (General regulatory factor 7)				NR	NR	↓	NR	NR	1.07874	0.199559	0.371312	0.960019	0.168193	0.61935	0.598022	0.309327	0.0233866	1.09668	0.315082	0.496329	0.737661	0.32994	0.12293	71	18	1957	4	0.00170603
HORVU2Hr1G080970	Betaine aldehyde dehydrogenase	AT3G48170	Betaine aldehyde dehydrogenase 2, mitochondrial, BADH, EC 1.2.1.8 (Aldehyde dehydrogenase family 10 member A9)	1.2.1.8			NR	NR	↓	NR	↓	0.927067	0.293517	0.596754	0.924826	0.273789	0.560585	0.0655082	0.0917901	2.42287e-07	1.04441	0.499008	0.845683	0.623662	0.225683	0.00754568	11	3	175	3	0.000169097
HORVU2Hr1G081080	UBX domain-containing protein|none|PF08059|IPR012989, IPR029071	AT4G04210	Plant UBX domain-containing protein 4, PUX4 (CDC48-interacting UBX-domain protein 4)				↑	NR	NR	NR	NR	1.58662	0.77022	0.0283348	1.10985	0.859021	0.773094	1.12286	0.632789	0.649337	0.687459	0.58772	0.327299	1.49294	0.820004	0.113726	32	7	151	7	0.000178682
HORVU2Hr1G083170	Peptide methionine sulfoxide reductase MsrA	AT5G07470	Peptide methionine sulfoxide reductase A3, AtMSRA3, EC 1.8.4.11 (Peptide-methionine (S)-S-oxide reductase, Peptide Met(O) reductase) (Protein-methionine-S-oxide reductase)	1.8.4.11			↓	NR	NR	↓	↑	0.255285	0.413968	0.045298	0.983911	1.32627	0.978967	0.335282	0.43661	0.0688113	0.081063	0.179429	0.00958628	1.98711	1.41888	0.0404803	11	2	79	2	7.87294e-05
HORVU2Hr1G085880	Lupus La protein homolog A	AT4G32720	La protein 1, AtLa1				↓	NR	↓	NR	NR	0.407924	0.298996	0.00625205	0.748477	0.347173	0.178628	0.527203	0.376924	0.0366594	0.97304	0.523237	0.911151	0.567511	0.412186	0.0646942	20	8	169	8	0.000194427
HORVU2Hr1G086080	6,7-dimethyl-8-ribityllumazine synthase	AT2G44050	6,7-dimethyl-8-ribityllumazine synthase, chloroplastic, DMRL synthase, LS, Lumazine synthase, EC 2.5.1.78	2.5.1.78			↓	↓	↓	NR	NR	0.63554	0.283293	0.0276343	0.668858	0.24349	0.0240615	0.719211	0.144675	0.00853425	0.811152	0.23862	0.13733	1.00119	0.336992	0.993846	43	7	628	7	0.000577121
HORVU2Hr1G086240	eukaryotic translation initiation factor 4G	AT5G57870	Eukaryotic translation initiation factor isoform 4G-1, eIF(iso)4G-1				NR	NR	NR	NR	↑	0.907115	0.574488	0.737428	1.5386	0.783381	0.0723413	0.983013	0.720707	0.959251	1.33139	0.813259	0.327358	1.74642	0.924749	0.0358132	24	12	329	12	0.000364209
HORVU2Hr1G092190	Hsp70-Hsp90 organizing protein	AT1G62740	Hsp70-Hsp90 organizing protein 2, AtHop2				↑	↑	↑	NR	NR	2.125	1.76979	0.0253319	2.31077	2.1102	0.0493968	7.93204	6.55419	1.4784e-05	1.72879	1.45875	0.11214	1.5792	1.35261	0.199459	10	6	203	3	0.000184158
HORVU2Hr1G093030	glutamate dehydrogenase 2	AT5G07440	Glutamate dehydrogenase 2, GDH 2, EC 1.4.1.3	1.4.1.3			NR	NR	↓	NR	NR	1.38211	0.694479	0.127724	1.09993	0.683798	0.736615	0.488446	0.28412	0.0497291	1.01213	0.62502	0.965976	0.566086	0.308735	0.0850791	31	5	194	4	0.000192374
HORVU2Hr1G098860	chr2H:685376741-685385984 HC_U|unknown function|none|none|none	AT2G32240	Uncharacterized protein		Černý et al., 2014		↓	↓	↓	↓	↓	0.362781	0.156368	0.000483272	0.593089	0.355518	0.0501658	0.167713	0.273099	0.000495526	0.429218	0.366951	0.0142679	0.139034	0.229047	0.000197573	7	11	197	11	0.000230027
HORVU2Hr1G101670	V-type proton ATPase subunit G 1	AT3G01390	V-type proton ATPase subunit G1, V-ATPase subunit G1 (Vacuolar H(+)-ATPase subunit G isoform 1) (Vacuolar proton pump subunit G1)				NR	NR	NR	↓	NR	0.99151	0.183974	0.920095	0.837332	0.226049	0.151269	1.08546	0.232508	0.420972	0.702164	0.148445	0.00269415	0.829406	0.190387	0.0859509	44	7	1935	7	0.00149997
HORVU2Hr1G103180	L-lactate dehydrogenase	N/A	N/A				↓	NR	↓	NR	↓	0.507101	0.184909	0.00543141	0.717187	0.288317	0.103279	0.388371	0.181021	0.00177062	0.911818	0.382131	0.633075	0.592645	0.220103	0.0178707	38	8	270	8	0.000292326
HORVU2Hr1G103310	Nucleoredoxin	AT1G60420	Probable nucleoredoxin 1, AtNrx1, EC 1.8.1.8	1.8.1.8			NR	NR	NR	↑	NR	0.927955	0.430053	0.734463	1.19542	0.569742	0.390512	0.656502	0.523134	0.246779	1.47428	0.68411	0.0507951	1.38289	0.717606	0.166214	29	10	464	10	0.000472377
HORVU2Hr1G109500	Protein transport protein SEC13 homolog A	AT2G30050	Protein transport protein SEC13 homolog B (SEC13-like protein B)				↓	NR	↓	NR	NR	0.534076	0.259412	0.00399283	0.892365	0.18154	0.234344	0.422766	0.396619	0.0107214	1.14168	0.319732	0.334104	0.905605	0.523253	0.696629	38	7	320	7	0.000332717
HORVU2Hr1G110120	Adenosylhomocysteinase	AT4G13940	Adenosylhomocysteinase 1, AdoHcyase 1, EC 3.3.1.1 (Protein EMBRYO DEFECTIVE 1395) (Protein HOMOLOGY-DEPENDENT GENE SILENCING 1) (S-adenosyl-L-homocysteine hydrolase 1, SAH hydrolase 1)	3.3.1.1			NR	↑	NR	↑	NR	1.05696	0.369958	0.734942	1.6867	0.563685	0.0143718	0.903087	0.212398	0.354932	1.54624	0.478689	0.0194292	1.10567	0.418101	0.57817	39	16	1202	6	0.00113028
HORVU2Hr1G111600	Adenine nucleotide alpha hydrolases-like superfamily protein	AT1G68300	Usp domain-containing protein				NR	NR	↑	NR	NR	1.24497	0.428327	0.204324	1.0684	0.510386	0.768262	1.53065	0.338209	0.000841129	1.26433	0.39573	0.137497	1.26277	0.318841	0.0634015	15	2	242	2	0.00020675
HORVU2Hr1G112830	Nuclease S1	AT1G68290	Endonuclease 2, AtENDO2, EC 3.1.30.1 (Deoxyribonuclease ENDO2) (Single-stranded-nucleate endonuclease ENDO2)	3.1.30.1			↑	NR	↓	NR	↓	1.46042	0.519502	0.0372609	0.803261	0.426251	0.358182	0.456833	0.298075	0.0103797	0.658338	0.500047	0.188517	0.433106	0.467345	0.0376225	13	2	203	2	0.00019032
HORVU2Hr1G113180	D-3-phosphoglycerate dehydrogenase	AT1G17745	D-3-phosphoglycerate dehydrogenase 2, chloroplastic, PGDH, EC 1.1.1.95	1.1.1.95			NR	NR	NR	NR	↑	1.11608	0.248969	0.283643	1.02634	0.250127	0.815555	0.780619	0.364473	0.23103	1.16875	0.263203	0.139058	1.36107	0.304878	0.0080518	58	16	2631	15	0.00219758
HORVU2Hr1G115640	beta-D-xylosidase 4	AT5G64570	Beta-D-xylosidase 4, AtBXL4, EC 3.2.1.37	3.2.1.37			NR	NR	NR	NR	↓	1.01118	0.3302	0.940713	0.904391	0.272333	0.483768	1.13722	0.630929	0.628686	0.992485	0.33148	0.960747	0.630703	0.247713	0.0271007	21	10	451	10	0.000465531
HORVU2Hr1G117770	sulfotransferase 2A	AT5G07010	Cytosolic sulfotransferase 15, AtSOT15, EC 2.8.2.39 (Sulfotransferase 2a, AtST2a)	2.8.2.39	Zhang et al., 2012	Brenner et al., 2005	↑	NR	↓	NR	NR	1.39523	0.308002	0.00522538	0.790325	0.220468	0.0884608	0.713654	0.16028	0.0113673	1.19543	0.314456	0.162315	0.819908	0.209415	0.117598	36	12	1222	12	0.00107483
HORVU2Hr1G120530	Wound-induced protein	AT3G04720	Hevein-like preproprotein [Cleaved into: CB-HEL; CD-HEL, EC 3.1.-.- (RNase) ]	3.1.-.-			↑	NR	NR	NR	NR	1.37679	0.385244	0.0429685	0.792663	0.26659	0.127468	0.982635	0.431778	0.930237	0.765407	0.324674	0.149568	0.883367	0.239726	0.317515	54	6	770	4	0.000672281
HORVU2Hr1G121990	calreticulin 1b	AT1G08450	Calreticulin-3 (Protein PRIORITY IN SWEET LIFE 1)				NR	NR	↓	NR	NR	1.03162	0.527694	0.893946	0.969532	0.441905	0.883561	0.441927	0.335178	0.0319633	0.660553	0.453273	0.197726	0.715551	0.44768	0.260635	34	11	547	11	0.000527145
HORVU2Hr1G123220	RNA pyrophosphohydrolase	AT3G10620	Nudix hydrolase 26, chloroplastic, AtNUDT26, EC 3.6.1.- (Bis(5'-nucleosyl)-tetraphosphatase (asymmetrical))	3.6.1.-			NR	NR	↓	NR	NR	0.574745	0.385554	0.0710379	1.43736	0.86382	0.246047	0.300524	0.371833	0.00934094	0.566086	0.49933	0.11882	1.27931	0.511407	0.184605	53	5	98	5	0.000115013
HORVU2Hr1G124970	Peroxidase superfamily protein	AT1G71695	Peroxidase 12, Atperox P12, EC 1.11.1.7 (ATP4a) (PRXR6)	1.11.1.7		Brenner et al., 2012	↑	NR	NR	↓	↓	1.37327	0.325775	0.0112276	0.775676	0.299372	0.152266	0.834612	0.513149	0.496667	0.660564	0.199579	0.0119142	0.635846	0.16996	0.00495651	24	5	482	4	0.000442939
HORVU2Hr1G125200	Peroxidase superfamily protein	N/A	N/A				↓	↓	NR	NR	NR	0.506857	0.256812	0.00990778	0.665347	0.234513	0.0363727	1.08128	0.360732	0.607813	0.763162	0.306965	0.164986	0.831014	0.235235	0.206149	44	7	625	7	0.000585336
HORVU3Hr1G001140	Ribosomal protein L6 family	AT1G33120	60S ribosomal protein L9-1				↓	NR	NR	NR	NR	0.435788	0.173497	0.000492457	1.0744	0.331432	0.616702	0.948336	0.247401	0.6606	1.27314	0.351242	0.0806449	1.12083	0.2734	0.312759	53	11	799	11	0.000727049
HORVU3Hr1G002780	fructose-bisphosphate aldolase 2	AT2G21330	Fructose-bisphosphate aldolase 1, chloroplastic, AtFBA1, EC 4.1.2.13	4.1.2.13	Černý et al., 2014		↑	NR	NR	↑	NR	1.77777	0.5695	0.00166262	1.01779	0.289881	0.891915	1.09795	0.384988	0.561822	1.46287	0.446351	0.012494	1.15364	0.356255	0.309041	34	4	670	4	0.000530568
HORVU3Hr1G004850	UDP-Glycosyltransferase superfamily protein	AT1G01390	UDP-glycosyltransferase 72B2, EC 2.4.1.-	2.4.1.-			NR	NR	↓	NR	↑	0.934125	0.641108	0.827334	0.632726	0.784299	0.355141	0.397383	0.285309	0.0175563	1.1399	0.773896	0.681483	1.74011	0.857925	0.0242864	18	5	187	5	0.00019032
HORVU3Hr1G006440	Xylanase inhibitor|none|PF14541, PF14543|IPR021109, IPR032799, IPR032861	AT1G03230	Uncharacterized protein				NR	NR	NR	NR	↓	0.992694	0.141127	0.91075	0.855147	0.14063	0.0672945	1.01073	0.282953	0.933937	0.749109	0.111887	0.00258364	0.646119	0.0907459	0.000202675	49	12	4811	11	0.00355994
HORVU3Hr1G006530	16.9 kDa class I heat shock protein 1|none|PF00011|IPR002068, IPR008978	AT5G59720	18.1 kDa class I heat shock protein (18.1 kDa heat shock protein, AtHsp18.1)				NR	NR	↑	NR	NR	1.63506	2.5224	0.424272	0.487927	0.907324	0.476571	28.2831	40.9769	4.8339e-07	0.0656922	0.1694	0.178591	0.813582	1.32731	0.79582	50	11	520	1	0.000411447
HORVU3Hr1G007380	16.9 kDa class I heat shock protein 2|none|PF00011|IPR002068, IPR008978	AT1G53540	17.6 kDa class I heat shock protein 3 (17.6 kDa heat shock protein 3, AtHsp17.6C)				NR	NR	↑	NR	NR	1.69421	2.60832	0.386572	0.732425	1.36504	0.729065	32.2013	46.7164	8.56495e-07	0.0656922	0.1694	0.178591	0.813582	1.32731	0.79582	53	11	589	1	0.000463477
HORVU3Hr1G007500	16.9 kDa class I heat shock protein 1|none|PF00011|IPR002068, IPR008978	AT1G53540	17.6 kDa class I heat shock protein 3 (17.6 kDa heat shock protein 3, AtHsp17.6C)				NR	NR	↑	NR	NR	0.349989	0.536833	0.203015	0.395735	0.459456	0.212273	18.4698	18.431	2.3747e-07	0.17219	0.250592	0.0943109	0.67132	0.876741	0.53384	48	11	454	4	0.000377901
HORVU3Hr1G009370	Non-specific lipid-transfer protein 4.1	AT5G59310	Non-specific lipid-transfer protein 4, LTP 4				↓	NR	↓	↓	NR	0.726588	0.172181	0.0139891	0.692954	0.290774	0.0535409	0.615577	0.25996	0.0142451	0.548046	0.195228	0.0017231	0.636333	0.370319	0.0643803	23	3	326	3	0.000288903
HORVU3Hr1G010530	14-3-3-like protein GF14-E	N/A	N/A				NR	NR	↓	NR	NR	1.13549	0.201737	0.133236	1.02303	0.158298	0.746677	0.633795	0.305953	0.0310822	1.15955	0.302138	0.245841	0.763942	0.324284	0.149479	62	16	1889	3	0.0016232
HORVU3Hr1G015190	30S ribosomal protein S7	AT2G37270	40S ribosomal protein S5-1 (AtRPS5B)				NR	↑	NR	↑	NR	0.871439	0.198791	0.221862	1.46633	0.448164	0.0250858	0.823168	0.244891	0.172078	1.53582	0.546617	0.0366275	1.3394	0.314262	0.0158306	55	12	879	12	0.000821524
HORVU3Hr1G015640	alkenal reductase	AT5G16990	NADP-dependent alkenal double bond reductase P2, EC 1.3.1.74	1.3.1.74			↑	NR	NR	NR	NR	3.13752	1.66734	0.000952786	1.83058	1.0822	0.0530127	1.01338	0.991538	0.976461	1.23369	0.638027	0.367265	1.45412	0.739105	0.107991	28	4	222	4	0.000226604
HORVU3Hr1G018220	RNA-binding protein EWS	AT5G56510	Pumilio homolog 12, APUM-12, AtPUM12				NR	NR	↑	↑	NR	0.627643	0.424025	0.141867	0.97849	0.660579	0.943809	1.84485	0.983105	0.0347251	1.70908	0.716945	0.00698335	1.3761	0.657118	0.15254	15	3	446	3	0.000368317
HORVU3Hr1G020230	HXXXD-type acyl-transferase family protein	AT3G62160	At3g62160 (HXXXD-type acyl-transferase family protein)				NR	↑	NR	NR	NR	0.8785	0.569813	0.660072	1.88016	0.903828	0.0134615	0.806322	0.674983	0.557266	1.38232	0.776022	0.237947	0.887392	0.581213	0.687681	12	5	156	5	0.000177997
HORVU3Hr1G020390	17.6 kDa class II heat shock protein|none|PF00011|IPR002068, IPR008978	AT5G12020	17.6 kDa class II heat shock protein (17.6 kDa heat shock protein, AtHsp17.6)				NR	NR	↑	NR	NR	0.787765	0.217127	0.0846497	0.955862	0.257182	0.715755	3.69812	0.924586	1.84171e-06	0.951614	0.217468	0.641725	1.04684	0.311549	0.738943	58	7	1073	4	0.00086397
HORVU3Hr1G020490	17.6 kDa class II heat shock protein|none|PF00011|IPR002068, IPR008978	AT5G12020	17.6 kDa class II heat shock protein (17.6 kDa heat shock protein, AtHsp17.6)				↓	NR	↑	NR	NR	0.701543	0.211864	0.0335056	0.877544	0.257539	0.353641	4.45377	1.2824	1.46866e-06	0.944992	0.262231	0.662439	1.03253	0.37709	0.848927	46	8	1282	3	0.00104128
HORVU3Hr1G020500	17.6 kDa class II heat shock protein|none|PF00011|IPR002068, IPR008978	AT5G12020	17.6 kDa class II heat shock protein (17.6 kDa heat shock protein, AtHsp17.6)				↓	NR	↑	NR	NR	0.606859	0.206422	0.00619963	0.79103	0.25313	0.123619	3.57284	0.872766	1.99581e-06	0.903263	0.201626	0.342559	1.081	0.341291	0.597883	44	9	1728	4	0.00140275
HORVU3Hr1G020520	17.6 kDa class II heat shock protein|none|PF00011|IPR002068, IPR008978	AT1G54050	17.4 kDa class III heat shock protein (17.4 kDa heat shock protein 2, AtHsp17.4B)				↓	NR	↑	NR	NR	0.655629	0.243664	0.0466817	0.861957	0.365202	0.456156	7.25456	2.66747	2.00868e-06	1.00567	0.363312	0.97272	1.08871	0.443893	0.649125	50	10	1004	5	0.000828371
HORVU3Hr1G023970	glutaredoxin 4	AT3G15660	Monothiol glutaredoxin-S15, mitochondrial, AtGrxS15				↓	NR	NR	NR	NR	0.377978	0.231659	0.00138263	0.621415	0.391421	0.0787986	0.887349	0.274506	0.413306	0.773876	0.24198	0.105413	0.8696	0.27348	0.349456	26	4	402	4	0.000373109
HORVU3Hr1G024500	Glutathione S-transferase family protein	AT1G10370	Glutathione S-transferase U17, AtGSTU17, EC 2.5.1.18 (GST class-tau member 17) (Glutathione S-transferase 30) (Protein EARLY RESPONSIVE TO DEHYDRATION 9)	2.5.1.18			NR	NR	↓	↓	↑	0.408433	0.411134	0.0980207	0.691277	0.548083	0.362657	0.286628	0.291976	0.0437088	0.00152225	0.000995727	0.00662208	3.68176	2.43787	1.26515e-05	46	8	280	8	0.00028548
HORVU3Hr1G030650	Late embryogenesis abundant protein	AT1G01470	Probable desiccation-related protein LEA14				NR	↑	NR	NR	NR	1	0	NS	998.514	825.732	0.0222655	1	0	NS	1	0	NS	1	0	NS	69	5	49	5	4.313e-05
HORVU3Hr1G032400	D-alanine aminotransferase	AT5G57850	D-amino-acid transaminase, chloroplastic, EC 2.6.1.21, EC 4.1.3.38 (Aminodeoxychorismate lyase, AtADCL) (Branched-chain-amino-acid aminotransferase-like protein 3)	2.6.1.21			↓	↓	↓	NR	↓	0.716646	0.154728	0.00560812	0.548868	0.268517	0.00600864	0.673092	0.135456	0.00140509	0.730045	0.156826	0.00761113	0.709586	0.147922	0.00404887	44	7	842	7	0.000735264
HORVU3Hr1G037720	Peroxiredoxin-2D	AT3G06050	Peroxiredoxin-2F, mitochondrial, EC 1.11.1.25 (Glutaredoxin-dependent peroxiredoxin) (Peroxiredoxin IIF) (Thioredoxin peroxidase 2F)	1.11.1.25			↓	↓	↓	NR	NR	0.602941	0.318	0.0485375	0.637196	0.268834	0.0438146	0.602882	0.251901	0.0275144	0.576083	0.438532	0.0873568	0.809149	0.461301	0.406691	26	5	233	5	0.000225235
HORVU3Hr1G038190	Cysteine proteinase inhibitor 12	AT3G12490	Cysteine proteinase inhibitor 6, AtCYS-6 (PIP-M) (PRLI-interacting factor M)				NR	NR	↑	NR	NR	0.871583	0.131992	0.0758122	0.850144	0.173114	0.0997445	1.48088	0.209928	5.75786e-05	0.926726	0.179641	0.397668	1.2473	0.221902	0.0210533	40	9	1108	9	0.000958445
HORVU3Hr1G038950	60S ribosomal protein L30	N/A	N/A				↓	NR	NR	NR	NR	0.529813	0.430203	0.114158	1.21942	0.691824	0.428891	0.756279	0.567517	0.426109	1.26524	0.709499	0.339583	1.07902	0.643018	0.777813	21	2	117	2	0.00011296
HORVU3Hr1G039050	Chromosome 3B, genomic scaffold, cultivar Chinese Spring|none|PF02987|IPR004238	AT2G36640	Late embryogenesis abundant protein ECP63 (Embryonic cell protein 63, AtECP63) (LEA domain-containing protein ECP63)			Brenner et al., 2005	↓	NR	NR	NR	NR	0.248512	0.17618	0.00604686	0.586362	0.41509	0.13029	0.503983	0.313546	0.0548299	0.556894	0.308846	0.0732966	0.963665	0.803033	0.922335	33	12	375	12	0.000421031
HORVU3Hr1G064470	Chitinase family protein	AT3G12500	Basic endochitinase B, EC 3.2.1.14 (Pathogenesis-related protein 3, AtChiB, PR-3)	3.2.1.14			NR	NR	NR	NR	↓	0.818532	0.152226	0.0300548	0.958439	0.200086	0.654833	0.862566	0.22455	0.209347	0.829637	0.286193	0.219039	0.709001	0.16489	0.00419598	31	6	1849	5	0.00144109
HORVU3Hr1G065490	chr3H:498928253-498933564 LC_U|Chromosome 3B, genomic scaffold, cultivar Chinese Spring|none|none|none	N/A	N/A				NR	NR	↑	NR	NR	0.686825	0.827064	0.509962	1.37692	1.41465	0.489494	2.29853	2.07894	0.0315568	1.22817	1.21538	0.640778	1.70061	1.6386	0.21079	40	8	275	8	0.000286164
HORVU3Hr1G066340	Late embryogenesis abundant protein 76|none|none|none	AT3G15670	Late embryogenesis abundant protein 29 (LEA 76 homolog)				NR	↑	NR	NR	NR	0.0101253	0.0169171	0.214716	6.49181	11.9845	0.0450766	0.211011	0.571023	0.331895	0.409592	1.12525	0.501785	0.0101253	0.0169171	0.214716	23	5	43	5	4.313e-05
HORVU3Hr1G067110	Glycine dehydrogenase (decarboxylating)	AT2G26080	Glycine dehydrogenase (decarboxylating) 2, mitochondrial, EC 1.4.4.2 (Glycine cleavage system P protein 2) (Glycine decarboxylase 2) (Glycine decarboxylase P-protein 2, AtGLDP2) (Glycine dehydrogenase (aminomethyl-transferring) 2)	1.4.4.2			NR	NR	↓	NR	NR	0.915399	0.254597	0.485171	1.20931	0.490833	0.353635	0.549333	0.34285	0.0195745	1.16737	0.224084	0.100689	1.51541	0.633742	0.0893214	19	11	376	11	0.000430616
HORVU3Hr1G071740	Ras-related protein Rab-25	AT1G16920	Ras-related protein RABA1b, AtRABA1b (Ras-related protein Rab11, AtRab11)				NR	NR	↓	NR	NR	1.1438	0.569839	0.554853	1.25138	0.698295	0.394999	0.46483	0.226606	0.016399	1.40468	0.79765	0.223245	1.00355	0.494357	0.987476	14	4	195	4	0.000198535
HORVU3Hr1G073220	aspartate aminotransferase 3	AT5G11520	Aspartate aminotransferase 3, chloroplastic, EC 2.6.1.1 (Protein YELLOW-LEAF-SPECIFIC GENE 4) (Transaminase A)	2.6.1.1	Žďárská et al., 2013		↓	NR	NR	NR	NR	0.450422	0.316146	0.0223735	1.36447	0.595599	0.126166	0.778423	0.381592	0.292395	1.29541	0.68505	0.307823	1.14639	0.471904	0.458656	45	15	963	15	0.000989937
HORVU3Hr1G073780	Alpha-1,4-glucan-protein synthase [UDP-forming]	AT3G02230	UDP-arabinopyranose mutase 1, EC 5.4.99.30 (Reversibly glycosylated polypeptide 1, AtRGP1) (UDP-L-arabinose mutase 1)	5.4.99.30		Hoth et al. 2003	↓	NR	NR	NR	NR	0.447903	0.202968	0.000471872	0.942177	0.183587	0.512118	0.946487	0.278927	0.681399	1.28928	0.359537	0.0851344	0.895287	0.230153	0.35129	57	13	1045	9	0.000953653
HORVU3Hr1G074220	chorismate mutase 3	AT1G69370	Chorismate mutase 3, chloroplastic, AtCM3, EC 5.4.99.5 (CM-3)	5.4.99.5			NR	NR	NR	NR	↑	1.68931	0.877745	0.0703704	0.60167	0.473992	0.129405	0.305307	0.342487	0.0696434	1.71367	1.41376	0.261612	1.65327	0.696711	0.0248268	17	6	113	6	0.000136921
HORVU3Hr1G077000	Adenine nucleotide alpha hydrolases-like superfamily protein	AT5G54430	Universal stress protein PHOS32 (Phosphorylated protein of 32 kDa, AtPHOS32)				↑	NR	NR	NR	NR	1.63101	0.656919	0.0286613	0.754985	0.316587	0.163859	1.32899	0.803741	0.359882	0.91928	0.438223	0.697716	1.14632	0.601966	0.586227	24	5	197	2	0.00022455
HORVU3Hr1G077250	NAD(P)H dehydrogenase (quinone)	AT5G54500	NAD(P)H dehydrogenase (quinone) FQR1, EC 1.6.5.2 (Flavodoxin-like quinone reductase 1)	1.6.5.2			↓	↓	↓	↓	↓	0.481132	0.191436	0.000403039	0.573249	0.338281	0.0227498	0.702377	0.268051	0.0409964	0.651793	0.146503	0.00133833	0.669414	0.17432	0.00409162	36	4	292	2	0.000280688
HORVU3Hr1G078940	tubulin beta chain 2	AT5G12250	Tubulin beta-6 chain (Beta-6-tubulin)		Lochmanová et al., 2008 | Černý et al., 2011		↑	NR	NR	NR	NR	1.79551	0.807561	0.00284239	1.34252	0.617392	0.133524	0.753693	0.720506	0.495383	1.23389	0.593485	0.317665	0.792207	0.567819	0.477935	43	17	1477	2	0.00136852
HORVU3Hr1G085420	alpha-glucan phosphorylase 2	AT3G46970	Alpha-glucan phosphorylase 2, cytosolic, AtPHS2, EC 2.4.1.1 (Alpha-glucan phosphorylase, H isozyme) (Starch phosphorylase H)	2.4.1.1			NR	NR	↓	NR	NR	0.56992	0.350525	0.0541321	1.26825	0.564902	0.262057	0.421023	0.343467	0.0169989	1.155	0.503468	0.475082	0.867517	0.341831	0.451637	29	12	310	8	0.00033751
HORVU3Hr1G086500	Heat shock 70 kDa protein|none|PF00012|IPR013126, IPR018181, IPR029047, IPR029048	AT3G09440	Heat shock 70 kDa protein 3 (Heat shock cognate 70 kDa protein 3) (Heat shock cognate protein 70-3, AtHsc70-3) (Heat shock protein 70-3, AtHsp70-3)				NR	NR	↑	NR	NR	1.15138	0.13821	0.0283305	1.13654	0.179368	0.112093	1.48445	0.169909	3.03931e-05	1.17877	0.110275	0.00270259	1.01765	0.0898331	0.666286	56	32	4960	6	0.0040864
HORVU3Hr1G086540	ubiquitin-conjugating enzyme 13|none|PF00179|IPR000608, IPR016135, IPR023313	AT5G59300	Ubiquitin-conjugating enzyme E2 7, EC 2.3.2.23 (E2 ubiquitin-conjugating enzyme 7) (Ubiquitin carrier protein 7) (Ubiquitin-protein ligase 7)	2.3.2.23			NR	↓	NR	↓	NR	0.649146	0.305868	0.0613174	0.537741	0.196489	0.0070933	0.608497	0.359939	0.0651097	0.507979	0.200391	0.00557618	0.891405	0.45537	0.618549	34	4	342	4	0.000325187
HORVU3Hr1G091790	Cathepsin B-like cysteine proteinase	AT1G20850	Cysteine protease XCP2, EC 3.4.22.- (Xylem cysteine peptidase 2, AtXCP2)	3.4.22.-			NR	NR	↓	NR	NR	0.878665	0.380765	0.525238	1.07663	0.562609	0.760485	0.42009	0.328795	0.015468	0.756354	0.514383	0.351893	1.09154	0.664702	0.758876	35	7	477	5	0.000460738
HORVU3Hr1G100350	Xylanase inhibitor|none|PF14541, PF14543|IPR021109, IPR032799, IPR032861	AT1G03220	Eukaryotic aspartyl protease family protein (F15K9.17 protein)				NR	NR	↑	NR	NR	0.71162	0.714399	0.450869	1.57956	1.34665	0.28454	2.42395	1.82002	0.0339542	1.25216	0.874471	0.474153	1.08709	0.990175	0.843154	18	6	369	6	0.00037927
HORVU3Hr1G108110	villin 2	AT2G41740	Villin-2				NR	NR	↓	NR	NR	0.739034	0.30927	0.121616	1.1622	0.634398	0.571519	0.319616	0.250647	0.000969468	1.21041	0.545524	0.389593	0.701915	0.286097	0.06998	15	8	198	8	0.000246457
HORVU3Hr1G108720	NADPH:quinone oxidoreductase	AT3G27890	NADPH:quinone oxidoreductase, EC 1.6.5.2	1.6.5.2			NR	NR	NR	NR	↑	0.0155314	0.015558	0.0526569	0.633847	1.08711	0.553362	0.679161	1.16206	0.61323	0.0155314	0.015558	0.0526569	7.56744	7.79253	3.25121e-05	15	3	41	3	4.58685e-05
HORVU3Hr1G111650	Progesterone 5 beta reductase|none|none|IPR016040	AT4G24220	3-oxo-Delta(4,5)-steroid 5-beta-reductase, EC 1.3.1.3 (Delta(4)-3-oxosteroid 5-beta-reductase) (Delta-4,5-steroid 5-beta-reductase, At5beta-StR) (Progesterone 5-beta-reductase, 5beta-POR) (Protein VEIN PATTERNING 1)	1.3.1.3			NR	↑	NR	NR	NR	1.55236	1.03169	0.168255	2.64981	1.99894	0.0386113	1.57137	1.39783	0.331225	1.88419	1.24455	0.0605693	1.96232	1.58871	0.136836	14	4	83	4	9.99521e-05
HORVU3Hr1G112350	Peroxidase superfamily protein	AT1G71695	Peroxidase 12, Atperox P12, EC 1.11.1.7 (ATP4a) (PRXR6)	1.11.1.7		Brenner et al., 2012	↓	NR	NR	NR	NR	0.364211	0.240594	0.00117698	0.912527	0.333977	0.584438	0.898494	0.259157	0.431466	0.800465	0.263386	0.161493	1.04289	0.38164	0.803804	42	13	785	10	0.000735264
HORVU3Hr1G113620	Wound-induced protein	AT3G04720	Hevein-like preproprotein [Cleaved into: CB-HEL; CD-HEL, EC 3.1.-.- (RNase) ]	3.1.-.-			↑	NR	NR	NR	NR	1.38756	0.211189	0.000761113	0.892691	0.136441	0.129973	1.09741	0.154744	0.167336	1.07942	0.340762	0.61046	0.935268	0.18972	0.472321	47	5	1717	2	0.00128295
HORVU3Hr1G113950	Malignant T-cell-amplified sequence 1-A	AT1G09150	PUA domain-containing protein				NR	NR	↓	NR	NR	0.893667	0.378459	0.5593	1.11579	0.449853	0.563777	0.439065	0.305349	0.0073802	0.793422	0.423751	0.327317	0.828551	0.434779	0.419467	28	4	306	4	0.00028548
HORVU3Hr1G115820	40S ribosomal protein S28	AT3G10090	40S ribosomal protein S28-1				↓	NR	↑	↓	NR	0.47346	0.159546	0.000183326	0.755408	0.33863	0.15103	1.36539	0.341644	0.0263346	0.650802	0.192316	0.00551806	0.867176	0.209325	0.209566	46	5	611	5	0.000542891
HORVU3Hr1G117650	23 kDa jasmonate-induced protein|none|none|none	AT1G31840	Putative pentatricopeptide repeat-containing protein At1g31840				NR	NR	NR	↓	NR	0.891401	0.183688	0.254755	1.03145	0.276375	0.801672	0.792401	0.180355	0.0525699	0.707549	0.222561	0.0288101	0.811377	0.18807	0.0787958	39	3	927	3	0.000670912
HORVU4Hr1G000850	Calcium-dependent lipid-binding (CaLB domain) family protein	AT5G23950	C2 domain-containing protein				NR	NR	NR	↓	NR	0.830766	0.195957	0.115743	0.971867	0.279863	0.828568	1.09649	0.296415	0.466982	0.683285	0.133938	0.00354906	0.901172	0.208804	0.344423	26	5	580	5	0.000519614
HORVU4Hr1G002530	tubulin beta chain 4	AT2G29550	Tubulin beta-7 chain (Beta-7-tubulin)		Lochmanová et al., 2008 | Černý et al., 2011		↑	NR	NR	NR	NR	1.91964	0.926246	0.00217999	1.32373	0.685535	0.216022	0.721173	0.684324	0.430686	1.28931	0.671974	0.266585	0.808023	0.644152	0.554653	36	13	1069	3	0.00100021
HORVU4Hr1G004780	Costars family protein ABRACL|none|PF14705|IPR027817	AT4G33640	Costars family protein At4g33640				NR	NR	NR	↓	NR	1.23155	0.866891	0.507801	1.1327	0.834093	0.708608	0.628068	0.664116	0.328625	0.0549044	0.120983	0.00589408	0.979302	0.774754	0.954093	25	3	124	3	0.000130759
HORVU4Hr1G005100	Tudor domain-containing protein 1	AT5G07350	Ribonuclease TUDOR 1, AtTudor1, TUDOR-SN protein 1, EC 3.1.-.-	3.1.-.-			↓	NR	↓	NR	NR	0.658124	0.206389	0.00572806	1.11781	0.210712	0.228374	0.453811	0.112542	5.76313e-06	1.03365	0.257757	0.775316	0.939837	0.115661	0.288938	40	33	1391	33	0.00145068
HORVU4Hr1G005920	lipoxygenase 1	AT1G55020	Linoleate 9S-lipoxygenase 1, EC 1.13.11.58 (Lipoxygenase 1, AtLOX1)	1.13.11.58		Nemhauser et al., 2006 | Brenner et al., 2012 | Nishiyama et al., 2012	↑	NR	↓	NR	NR	1.6972	0.547446	0.00130839	1.03201	0.380724	0.851542	0.604698	0.230736	0.0248004	0.903258	0.312955	0.537987	0.669201	0.269822	0.0621576	31	19	1015	18	0.00100979
HORVU4Hr1G007370	14-3-3-like protein GF14-F	AT5G38480	14-3-3-like protein GF14 psi (General regulatory factor 3) (Protein RARE COLD INDUCIBLE 1A)				NR	NR	↓	NR	NR	1.18518	0.209071	0.0466463	1.03708	0.175694	0.636377	0.645793	0.251056	0.0176847	1.14806	0.238882	0.165168	0.907858	0.298321	0.515744	88	25	3140	13	0.00263915
HORVU4Hr1G010300	Cathepsin B-like cysteine proteinase 5	AT1G02300	Cathepsin B-like protease 1, EC 3.4.22.- (Cathepsin B1, AtCathB1)	3.4.22.-			↓	NR	NR	NR	NR	0.691214	0.17342	0.00537949	0.800053	0.359719	0.251486	0.951748	0.235939	0.661281	0.77256	0.144374	0.0113876	0.863856	0.226717	0.224563	14	3	711	3	0.000585336
HORVU4Hr1G012460	Chaperone protein DnaK	AT4G24280	Heat shock 70 kDa protein 6, chloroplastic (Chloroplast heat shock protein 70-1, cpHsc70-1) (Heat shock protein 70-6, AtHsp70-6)				↓	NR	NR	NR	NR	0.683648	0.0909427	0.000128868	0.854893	0.125494	0.0384595	0.819224	0.137853	0.022341	1.02481	0.162167	0.73689	1.04959	0.186597	0.559581	49	23	2005	15	0.00185596
HORVU4Hr1G015170	17.6 kDa class II heat shock protein|none|PF00011|IPR002068, IPR008978	AT4G10250	22.0 kDa heat shock protein, AtHsp22.0				NR	NR	↑	NR	NR	1	0	NS	1	0	NS	1211.19	249.546	7.52833e-07	1	0	NS	1	0	NS	22	6	54	6	5.54529e-05
HORVU4Hr1G016410	Methylthioribose-1-phosphate isomerase	AT2G05830	Methylthioribose-1-phosphate isomerase, M1Pi, MTR-1-P isomerase, EC 5.3.1.23 (S-methyl-5-thioribose-1-phosphate isomerase) (Translation initiation factor eIF-2B subunit alpha/beta/delta-like protein)	5.3.1.23			↓	NR	NR	NR	NR	0.710744	0.14536	0.00603293	0.783575	0.289564	0.146476	0.875974	0.238752	0.296571	0.896786	0.243221	0.385043	1.08566	0.276444	0.490168	72	17	752	17	0.000745533
HORVU4Hr1G016440	Multiple organellar RNA editing factor 1, mitochondrial|none|none|none	AT4G20020	Multiple organellar RNA editing factor 1, mitochondrial (RNA editing-interacting protein 8)				↓	↓	NR	NR	NR	0.27087	0.372801	0.00428847	0.599256	0.261506	0.0215257	1.02974	0.401566	0.870237	0.832726	0.364367	0.359887	0.86623	0.32925	0.415539	14	5	283	5	0.000299856
HORVU4Hr1G016810	alcohol dehydrogenase 1	AT1G64710	Alcohol dehydrogenase-like 4, EC 1.1.1.1	1.1.1.1		Brenner et al., 2005	↓	NR	NR	↑	NR	0.498537	0.222777	0.00597796	1.10178	0.432572	0.594789	0.970737	0.40066	0.875124	1.68609	0.696906	0.0271341	1.15565	0.793526	0.664163	31	8	263	8	0.000271103
HORVU4Hr1G021270	UDP-glucose 6-dehydrogenase family protein	AT3G29360	UDP-glucose 6-dehydrogenase 2, UDP-Glc dehydrogenase 2, UDP-GlcDH 2, UDPGDH 2, EC 1.1.1.22 (At-UGD2)	1.1.1.22			NR	NR	NR	↑	NR	1.10209	0.421133	0.578603	1.27348	0.478888	0.17301	0.878899	0.415248	0.551211	1.69061	0.544339	0.00160178	1.12596	0.442502	0.512271	48	19	1558	9	0.00142534
HORVU4Hr1G023570	30S ribosomal protein S9	AT2G09990	40S ribosomal protein S16-1				↓	NR	NR	↑	NR	0.488621	0.277023	0.0124439	1.47536	0.645267	0.088115	1.23625	0.601413	0.370093	1.88166	0.852309	0.0201684	1.3223	0.421934	0.0589929	26	6	512	4	0.000503184
HORVU4Hr1G027040	Pyridoxal 5'-phosphate synthase subunit PdxS	AT5G01410	Pyridoxal 5'-phosphate synthase subunit PDX1.3, AtPDX1.3, AtPDX1;1, PLP synthase subunit PDX1.3, EC 4.3.3.6	4.3.3.6			NR	NR	↓	NR	NR	0.902775	0.181822	0.278355	0.892181	0.167457	0.202534	0.684837	0.178649	0.00561287	0.768403	0.166655	0.0188034	1.08996	0.236123	0.401862	58	15	1510	7	0.00137811
HORVU4Hr1G033200	translationally controlled tumor protein|none|PF00838|IPR011057, IPR011323, IPR018103, IPR018105	AT3G16640	Translationally-controlled tumor protein 1, TCTP1				↓	NR	NR	NR	NR	0.682737	0.211032	0.0172623	1.05123	0.466173	0.809375	1.19459	0.242424	0.0669083	1.17739	0.402569	0.329043	1.21919	0.335873	0.146487	35	7	839	7	0.000746218
HORVU4Hr1G043300	14-3-3-like protein GF14-D	AT1G35160	14-3-3-like protein GF14 phi (General regulatory factor 4)				NR	NR	↓	NR	NR	1.08752	0.201344	0.331812	0.935942	0.183592	0.469092	0.480372	0.198625	0.000579516	0.969843	0.240581	0.78712	0.758341	0.276908	0.0940772	50	13	1070	4	0.000950915
HORVU4Hr1G047580	H/ACA ribonucleoprotein complex subunit 1-like protein 2	AT5G07760	Putative formin-like protein 21a, AtFH21a				↓	NR	NR	NR	NR	0.443853	0.32021	0.0184847	1.12829	0.511588	0.563029	1.22592	0.643417	0.416675	1.1854	0.503451	0.38292	1.03367	0.388196	0.84605	21	3	160	3	0.000160882
HORVU4Hr1G050210	Vicilin-like antimicrobial peptides 2-3	AT2G28490	Vicilin-like seed storage protein At2g28490 (Globulin At2g28490)				NR	NR	NR	↓	NR	0.634769	0.294582	0.0909191	0.854631	0.722497	0.675635	1.34022	0.722848	0.247724	0.56179	0.275471	0.0507356	1.15476	0.773849	0.648069	20	7	796	7	0.000720888
HORVU4Hr1G050630	eukaryotic translation initiation factor 2 beta subunit	AT5G20920	Eukaryotic translation initiation factor 2 subunit beta, eIF2-beta (Protein EMBRYO DEFECTIVE 1401)			Hoth et al. 2003	↓	NR	NR	NR	NR	0.57577	0.23171	0.0207647	0.71649	0.405544	0.1991	0.760347	0.393003	0.254065	0.91327	0.331733	0.597423	0.768232	0.257637	0.143931	12	4	335	4	0.000314233
HORVU4Hr1G051780	Late embryogenesis abundant protein 1|none|PF02987|IPR004238	AT2G36640	Late embryogenesis abundant protein ECP63 (Embryonic cell protein 63, AtECP63) (LEA domain-containing protein ECP63)			Brenner et al., 2005	↓	NR	NR	↓	NR	0.587099	0.23116	0.0231977	0.838397	0.429944	0.45337	0.873742	0.368075	0.495263	0.536029	0.218635	0.013179	0.807164	0.417704	0.368141	28	11	563	11	0.000557267
HORVU4Hr1G054920	LL-diaminopimelate aminotransferase	AT2G13810	Aminotransferase ALD1, chloroplastic, EC 2.6.1.- (AGD2-like defense response protein 1)	2.6.1.83			↓	NR	NR	NR	NR	0.627262	0.256358	0.0347724	0.820597	0.374782	0.350578	0.750122	0.250928	0.107104	0.800795	0.312658	0.241202	0.834924	0.355274	0.365476	34	11	308	11	0.000360102
HORVU4Hr1G055230	40S ribosomal protein S7	AT3G02560	40S ribosomal protein S7-2				↓	NR	NR	NR	NR	0.70698	0.155547	0.00443657	1.11308	0.261079	0.342401	1.09764	0.256076	0.402293	1.2547	0.228749	0.0208038	1.26354	0.224353	0.0153984	45	9	2045	6	0.00165537
HORVU4Hr1G056050	pyruvate decarboxylase-2	AT4G33070	Pyruvate decarboxylase 1, AtPDC1, EC 4.1.1.1	4.1.1.1			NR	NR	NR	NR	↑	0.355961	0.950041	0.429419	5.07735	9.31097	0.101327	0.248753	0.657124	0.334731	1.84795	3.77413	0.524903	3.80811	6.24093	0.0243983	9	3	54	3	5.75067e-05
HORVU4Hr1G056240	Asparagine synthetase [glutamine-hydrolyzing] 1	AT3G47340	Asparagine synthetase [glutamine-hydrolyzing] 1, EC 6.3.5.4 (Glutamine-dependent asparagine synthetase 1) (Protein DARK INDUCIBLE 6)	6.3.5.4			↓	↑	NR	NR	↑	0.0130544	0.00937973	0.0118114	5.88524	5.10181	0.00403277	1.05639	1.83012	0.94594	2.17614	2.1474	0.139432	4.67628	4.63825	0.0310015	11	5	91	5	0.000110221
HORVU4Hr1G057210	Peroxidase superfamily protein	AT1G07890	L-ascorbate peroxidase 1, cytosolic, AP, AtAPx01, EC 1.11.1.11	1.11.1.11			NR	NR	↑	NR	NR	1.14946	0.171315	0.0650864	1.11668	0.290107	0.382559	1.36287	0.288044	0.0137842	1.01478	0.213171	0.879503	1.25417	0.209683	0.0154513	61	16	2809	16	0.0023256
HORVU4Hr1G057890	Glutathione S-transferase family protein	AT3G55040	Glutathione S-transferase L2, chloroplastic, AtGSTL2, EC 2.5.1.18 (GST class-lambda member 2)	2.5.1.18			NR	↓	↓	NR	↑	0.888287	0.245128	0.360029	0.597932	0.288082	0.0203066	0.654109	0.229913	0.0173355	0.777243	0.190114	0.0512424	1.48228	0.348354	0.00309562	19	5	396	3	0.00036284
HORVU4Hr1G059270	Glyoxalase family protein, expressed|none|PF00903|IPR004360, IPR029068	AT1G07645	DSI-1VOC				NR	NR	NR	↓	NR	1.02686	0.335334	0.859623	0.872504	0.45921	0.560088	1.09787	0.60019	0.718843	0.584123	0.184288	0.00544001	0.803425	0.307408	0.221315	30	4	343	4	0.000332033
HORVU4Hr1G063350	heat shock protein 21|none|PF00011|IPR002068, IPR008978	AT4G27670	Heat shock protein 21, chloroplastic (25.3 kDa heat shock protein, chloroplastic, AtHsp25.3)				↓	↓	↑	↓	NR	0.229171	0.390789	0.0158991	0.229098	0.194922	0.00549185	24.9439	11.6886	2.87279e-10	0.374759	0.454121	0.0487977	0.913139	0.662989	0.783794	42	14	504	14	0.000441569
HORVU4Hr1G063820	26S proteasome non-ATPase regulatory subunit 4 homolog|none|PF02809, PF13519|IPR002035, IPR003903	AT4G38630	26S proteasome non-ATPase regulatory subunit 4 homolog (26S proteasome regulatory subunit RPN10, AtRPN10) (26S proteasome regulatory subunit S5A homolog) (Multiubiquitin chain-binding protein 1, AtMCB1)				NR	NR	↓	NR	NR	1.27078	0.33581	0.0680767	0.92121	0.413222	0.684184	0.410001	0.376195	0.0103446	0.782557	0.232591	0.0957932	0.689691	0.445355	0.169624	17	6	453	6	0.000418293
HORVU4Hr1G064720	Deoxymugineic acid synthase1	AT1G59960	NAD(P)-linked oxidoreductase superfamily protein (Putative Aldo/keto reductase)				NR	NR	↓	NR	NR	0.836023	0.374836	0.402399	0.691282	0.375221	0.155621	0.464069	0.266807	0.0141439	0.828966	0.462202	0.4623	1.13732	0.454666	0.47646	26	4	191	4	0.000212912
HORVU4Hr1G066860	glutamine synthetase 1;4	AT5G16570	Glutamine synthetase cytosolic isozyme 1-4, EC 6.3.1.2 (Glutamate--ammonia ligase GLN1;4, GLN1;4)	6.3.1.2			NR	↓	NR	NR	NR	0.77889	0.228462	0.101247	0.588156	0.298629	0.0273033	0.8061	0.27426	0.191018	1.17966	0.355889	0.241084	0.913881	0.283614	0.535402	49	13	1781	13	0.00152256
HORVU4Hr1G070370	40S ribosomal protein S3a	AT4G34670	40S ribosomal protein S3a-2				↓	NR	NR	NR	NR	0.625752	0.228416	0.0267551	1.27878	0.465312	0.152871	0.9302	0.424086	0.728647	1.32712	0.502213	0.121879	1.13342	0.357437	0.375556	36	9	1017	5	0.000928323
HORVU4Hr1G070970	Vicilin-like antimicrobial peptides 2-2	AT2G18540	Vicilin-like seed storage protein At2g18540 (Globulin At2g18540)				↓	NR	NR	NR	NR	0.282079	0.139038	0.00130203	1.18868	0.985903	0.669623	0.875003	0.336451	0.475202	0.743725	0.336851	0.192611	1.07973	0.589578	0.761715	22	12	1077	12	0.000906415
HORVU4Hr1G071960	cell division cycle 48	AT3G01610	Cell division control protein 48 homolog C, AtCDC48c (Protein EMBRYO DEFECTIVE 1354)				NR	NR	NR	↑	NR	1.32577	0.278835	0.00657876	1.30543	0.323773	0.0316062	1.0136	0.52277	0.954673	1.44778	0.425316	0.0210627	1.23913	0.290379	0.0564518	69	43	4875	3	0.00428767
HORVU4Hr1G072010	cell division cycle 48	AT5G03340	Cell division control protein 48 homolog E, AtCDC48e (Transitional endoplasmic reticulum ATPase E)				↑	NR	NR	↑	NR	1.36781	0.293777	0.00353206	1.32537	0.345698	0.0320084	1.0058	0.539116	0.981263	1.50403	0.442778	0.0128671	1.23814	0.304898	0.070016	68	43	4417	3	0.00393921
HORVU4Hr1G072880	phosphoserine aminotransferase	AT4G35630	Phosphoserine aminotransferase 1, chloroplastic, AtPSAT1, EC 2.6.1.52 (Phosphohydroxythreonine aminotransferase)	2.6.1.52			NR	NR	NR	NR	↑	1.06722	0.388392	0.695471	0.959624	0.437357	0.843263	0.81046	0.321248	0.270594	1.11442	0.343999	0.432741	1.4222	0.477372	0.0310813	43	14	634	14	0.00065585
HORVU4Hr1G074450	Alba DNA/RNA-binding protein	AT3G07030	Alba DNA/RNA-binding protein				NR	NR	↓	↓	NR	0.674071	0.312101	0.104494	0.657445	0.430717	0.16213	0.607737	0.230438	0.0370439	0.551066	0.301392	0.0391672	1.0908	0.552387	0.709755	36	9	230	8	0.00026768
HORVU4Hr1G076770	Proteasome subunit alpha type-6	AT2G05840	Proteasome subunit alpha type-6-B, EC 3.4.25.1 (20S proteasome subunit alpha A-2) (Proteasome subunit alpha type-1)	3.4.25.1			NR	NR	↓	NR	NR	0.97875	0.215048	0.831546	1.07988	0.315251	0.575079	0.717854	0.227887	0.032541	1.25954	0.311397	0.0694773	0.985419	0.259571	0.903075	59	11	780	11	0.000768125
HORVU4Hr1G080610	2-oxoglutarate (2OG) and Fe(II)-dependent oxygenase superfamily protein	AT1G17020	Protein SRG1, AtSRG1 (Protein SENESCENCE-RELATED GENE 1)				NR	NR	NR	↑	↑	0.692293	0.388388	0.171312	0.829221	0.518792	0.507993	1.41939	0.77254	0.199538	1.88085	0.76717	0.003202	1.59061	0.681589	0.0286582	26	6	203	6	0.000240296
HORVU4Hr1G080640	Aconitate hydratase 1	AT2G05710	Aconitate hydratase 3, mitochondrial, Aconitase 3, mACO1, EC 4.2.1.3 (Citrate hydro-lyase 3)	4.2.1.3	Černý et al., 2014	Hoth et al. 2003	↓	NR	↓	NR	NR	0.600022	0.163497	0.000529751	0.897263	0.213089	0.314096	0.691998	0.11262	0.000346355	1.19136	0.225535	0.0779922	1.10029	0.182952	0.236975	51	32	2063	27	0.00195044
HORVU4Hr1G081100	Glutathione S-transferase family protein	AT3G03190	Glutathione S-transferase F11, AtGSTF11, EC 2.5.1.18 (AtGSTF6) (GST class-phi) (GST class-phi member 11)	2.5.1.18	Černý et al., 2014	Hoth et al. 2003	↑	NR	NR	NR	NR	1.91817	0.993491	0.0342963	1.39723	0.529366	0.0622246	0.875273	0.390627	0.52285	0.754759	0.480436	0.321562	0.959629	0.388226	0.825524	35	6	328	6	0.00028548
HORVU4Hr1G085050	purple acid phosphatase 27	AT5G50400	Probable inactive purple acid phosphatase 27				↑	NR	↓	NR	↓	1.92388	0.577086	0.000956391	1.15238	0.305696	0.248537	0.439878	0.156558	0.000582491	0.537708	0.460088	0.0640271	0.540746	0.327127	0.0212931	18	8	318	9	0.000332717
HORVU4Hr1G087230	Ectonucleoside triphosphate diphosphohydrolase 5	AT3G04080	Apyrase 1, AtAPY1, EC 3.6.1.5 (ATP-diphosphatase) (ATP-diphosphohydrolase) (Adenosine diphosphatase, ADPase) (NTPDase) (Nucleoside triphosphate diphosphohydrolase 1)	3.6.1.5			↑	NR	↓	↓	↓	2.31537	1.74955	0.0332423	0.863091	0.779983	0.722868	0.109499	0.245455	0.0126745	0.224508	0.362416	0.0324841	0.147787	0.222858	0.0145587	9	2	72	3	7.9414e-05
HORVU4Hr1G087310	Acid phosphatase	N/A	N/A				↑	NR	NR	NR	NR	1.34992	0.165714	0.000253763	0.847315	0.214971	0.153053	1.12455	0.246907	0.276644	0.813634	0.109085	0.00665913	0.862028	0.110525	0.0283718	57	15	3496	15	0.00269871
HORVU4Hr1G087400	rRNA N-glycosidase	AT1G47980	Desiccation-like protein				NR	NR	NR	↓	↓	0.581423	0.375545	0.0513	1.05009	0.365043	0.760111	1.29044	0.63395	0.306923	0.529215	0.357095	0.0282193	0.509012	0.299676	0.0128972	6	3	195	3	0.000193743
HORVU4Hr1G089090	Chaperone protein DnaK	AT4G24280	Heat shock 70 kDa protein 6, chloroplastic (Chloroplast heat shock protein 70-1, cpHsc70-1) (Heat shock protein 70-6, AtHsp70-6)				↓	NR	NR	NR	NR	0.617716	0.0775783	2.2744e-05	0.832809	0.107107	0.0123581	0.75923	0.100277	0.00135454	0.942038	0.13863	0.387104	0.981578	0.138877	0.775238	36	19	1394	7	0.00130349
HORVU4Hr1G090190	germin-like protein 2	AT3G05950	Germin-like protein subfamily 1 member 7				NR	NR	↑	NR	NR	1.09314	1.9735	0.91588	1.01999	1.44335	0.975663	5.4312	6.23266	0.0102816	0.0172394	0.0173816	0.0542879	0.960617	1.72418	0.960785	6	1	32	1	3.49148e-05
HORVU5Hr1G002010	malate dehydrogenase	AT2G22780	Malate dehydrogenase 1, peroxisomal, EC 1.1.1.37 (Peroxisomal NAD-dependent malate dehydrogenase 1, pxNAD-MDH1) (Peroxisomal malate dehydrogenase 1, Peroxisomal MDH1)	1.1.1.37			NR	NR	↓	NR	NR	0.852234	0.244277	0.246822	0.764381	0.235909	0.0825979	0.612088	0.184708	0.0060638	0.821163	0.237464	0.164965	0.93185	0.280981	0.612481	47	10	1013	9	0.000894092
HORVU5Hr1G005180	Pathogenesis-related thaumatin superfamily protein|none|PF00314|IPR001938, IPR017949	AT4G11650	Osmotin-like protein OSM34				NR	NR	NR	↓	↓	1.20538	0.20508	0.031727	0.874936	0.189802	0.193579	0.885849	0.22789	0.305344	0.703467	0.239072	0.0276198	0.718201	0.189191	0.013667	32	6	963	5	0.000796879
HORVU5Hr1G006730	Carbon-nitrogen hydrolase	AT2G27450	N-carbamoylputrescine amidase, EC 3.5.1.53 (Nitrilase-like protein 1)	3.5.1.53			NR	NR	↓	NR	NR	1.13036	0.457361	0.525361	1.07658	0.31308	0.581931	0.619363	0.339297	0.0487103	0.624761	0.403956	0.084287	0.891132	0.208733	0.316009	31	8	198	8	0.000239611
HORVU5Hr1G010880	germin-like protein 2	AT5G38910	Putative germin-like protein subfamily 1 member 9			Nishiyama et al., 2012	↑	NR	NR	NR	NR	2.43759	0.775717	0.00012654	0.753631	0.393792	0.226649	1.33113	0.940955	0.436836	0.876902	0.456636	0.573193	0.824859	0.264935	0.222742	42	6	306	2	0.000306018
HORVU5Hr1G012200	mercaptopyruvate sulfurtransferase 1	AT1G79230	Thiosulfate/3-mercaptopyruvate sulfurtransferase 1, mitochondrial, EC 2.8.1.1, EC 2.8.1.2 (AtMST1) (Rhodanese homolog protein 1, AtRDH1) (Sulfurtransferase 1, AtStr1)	2.8.1.1			NR	↓	↓	NR	NR	0.938971	0.259709	0.615575	0.70926	0.170275	0.00698174	0.703966	0.240556	0.0275282	0.882788	0.275355	0.374084	1.00045	0.31421	0.997491	37	9	523	9	0.000527145
HORVU5Hr1G018080	adenine phosphoribosyltransferase 5	AT4G22570	Adenine phosphoribosyltransferase 3, EC 2.4.2.7	2.4.2.7			NR	↓	NR	NR	NR	1.30641	0.438696	0.0924701	0.64561	0.279991	0.0490946	0.864087	0.338493	0.427359	1.28657	0.700018	0.355423	1.2253	0.583492	0.379457	53	5	270	5	0.000269734
HORVU5Hr1G021140	Mitochondrial import inner membrane translocase subunit Tim9|none|PF02953|IPR004217	AT3G46560	Mitochondrial import inner membrane translocase subunit TIM9 (Protein EMBRYO DEFECTIVE 2474)				NR	NR	↓	↓	NR	0.754963	0.328014	0.203104	0.832409	0.404883	0.424614	0.505075	0.336604	0.0354048	0.440732	0.27741	0.0143128	0.581429	0.376335	0.0768206	42	3	150	3	0.000160882
HORVU5Hr1G021450	chr5H:103640063-103641610 LC_U|unknown function|none|none|none	N/A	N/A				NR	NR	↑	NR	NR	0.764869	0.642842	0.493181	1.79276	1.38477	0.137708	1.9717	1.18693	0.0106999	1.2094	0.886666	0.570629	1.1488	0.906789	0.703119	41	4	192	4	0.000197166
HORVU5Hr1G021480	unknown function|none|none|IPR001938	AT4G38660	Pathogenesis-related thaumatin superfamily protein (Putative thaumatin) (Putative thaumatin protein) (Thaumatin-like protein)				NR	NR	↑	NR	NR	1.35393	0.839368	0.347946	0.740335	0.423571	0.235165	1.66235	0.706064	0.035994	1.15427	0.624249	0.581248	0.762984	0.315978	0.171279	28	2	141	2	0.000132129
HORVU5Hr1G023720	Pathogenesis-related protein STH-2	AT1G35260	MLP-like protein 165				↑	↑	NR	NR	NR	1.38941	0.373422	0.0207962	1.42358	0.33121	0.00443354	1.10458	0.43618	0.594758	1.07011	0.312511	0.615847	1.0931	0.3745	0.579544	49	8	1158	3	0.000963237
HORVU5Hr1G024040	Zinc-binding dehydrogenase family protein	AT3G03080	Putative NADP-dependent oxidoreductase (Zinc-binding dehydrogenase family protein)				↑	↑	NR	NR	NR	4.57206	5.59929	0.0318458	6.78171	8.85226	0.0418218	0.0123316	0.0126919	0.0574714	3.04802	3.69323	0.0644393	0.990566	1.54478	0.989417	24	3	70	3	7.66756e-05
HORVU5Hr1G033480	adenylate kinase 1	AT5G50370	Adenylate kinase 3, AK 3, EC 2.7.4.3 (ATP-AMP transphosphorylase 3) (ATP:AMP phosphotransferase) (Adenylate monophosphate kinase 3, AMK3)	2.7.4.3			NR	↓	NR	↓	↓	0.871853	0.251463	0.320388	0.667844	0.252859	0.0338438	0.998154	0.284982	0.988739	0.662362	0.194031	0.0145032	0.616466	0.16316	0.00499475	35	8	780	4	0.000707196
HORVU5Hr1G034770	Ribosomal protein S3 family protein	AT5G35530	40S ribosomal protein S3-3				↓	↑	NR	↑	NR	0.57408	0.260594	0.0142763	1.41734	0.473787	0.0475989	0.904053	0.327444	0.544424	1.74593	0.701813	0.0226129	1.27187	0.403026	0.122235	43	8	553	8	0.000534676
HORVU5Hr1G042310	ACT domain-containing protein	AT5G04740	ACT domain-containing protein ACR12 (Protein ACT DOMAIN REPEATS 12)			Brenner et al., 2005	↓	NR	NR	NR	NR	0.723769	0.177285	0.021141	0.731276	0.269765	0.0757768	0.770292	0.19024	0.0497858	0.889617	0.205837	0.300048	0.913034	0.215466	0.419352	30	7	955	7	0.000800302
HORVU5Hr1G046550	Non-specific lipid-transfer protein 1	AT3G08770	Non-specific lipid-transfer protein 6, LTP 6 (Xylogen-like protein 15, AtXYP15)				NR	NR	NR	↓	NR	0.752755	0.380474	0.217454	1.1734	0.649853	0.550971	1.33621	0.436267	0.0661901	0.645938	0.198186	0.0198762	0.879033	0.321037	0.452377	24	2	1110	2	0.000825632
HORVU5Hr1G048010	Clathrin, heavy chain	AT3G11130	Clathrin heavy chain 1				NR	↑	NR	NR	NR	0.29521	0.77658	0.365935	6.24731	10.423	0.0210082	0.0136823	0.0210762	0.182719	3.0223	5.16564	0.127029	0.802407	1.46737	0.803766	5	5	50	5	5.75067e-05
HORVU5Hr1G048890	Carbamoyl-phosphate synthase small chain	AT3G27740	Carbamoyl-phosphate synthase small chain, chloroplastic, EC 6.3.5.5 (Carbamoyl-phosphate synthetase glutamine chain) (Protein VENOSA 6)	6.3.5.5			↓	↓	NR	NR	NR	0.696144	0.242205	0.0315252	0.520401	0.315951	0.0116953	0.701894	0.299942	0.066721	0.845478	0.208896	0.161015	1.00419	0.265287	0.972465	16	4	253	4	0.000277949
HORVU5Hr1G053680	Protein GrpE	AT4G26780	GrpE protein homolog 2, mitochondrial				NR	NR	↓	NR	↓	0.781511	0.303642	0.194621	0.945875	0.446635	0.79609	0.41805	0.34145	0.0124115	0.661466	0.517512	0.205863	0.349407	0.253534	0.00268064	19	5	229	5	0.000243034
HORVU5Hr1G055350	phosphoenolpyruvate carboxylase 1	AT1G53310	Phosphoenolpyruvate carboxylase 1, AtPPC1, PEPC 1, PEPCase 1, EC 4.1.1.31 (107-kDa PEPC polypeptide)	4.1.1.31			NR	↑	NR	↑	NR	1.08365	0.51655	0.707848	1.45094	0.634244	0.0487077	0.704977	0.739246	0.427994	1.58216	0.706019	0.0209086	1.10402	0.529892	0.645904	14	10	420	8	0.000424454
HORVU5Hr1G062310	10 kDa chaperonin	AT5G20720	20 kDa chaperonin, chloroplastic (Chaperonin 10, Ch-CPN10, Cpn10) (Chaperonin 20) (Protein Cpn21)				↓	NR	NR	↓	NR	0.475522	0.353931	0.0184391	0.613609	0.346949	0.0559009	1.05007	0.558381	0.843488	0.475653	0.392302	0.0262923	0.810902	0.216488	0.137136	49	7	272	7	0.000295064
HORVU5Hr1G065170	related to ubiquitin 1	AT1G31340	Ubiquitin-NEDD8-like protein RUB1 [Cleaved into: Ubiquitin; NEDD8-like protein RUB1 (Ubiquitin-related protein 1, AtRUB1) ]				↓	NR	NR	NR	NR	0.571674	0.103006	6.67226e-05	0.797561	0.113914	0.0080943	1.00622	0.226215	0.952076	0.842573	0.1501	0.0587354	0.909902	0.145907	0.223353	35	9	1702	2	0.00135278
HORVU5Hr1G067570	Protein disulfide isomerase-like 2-3	AT1G04980	Protein disulfide-isomerase like 2-2, AtPDIL2-2, EC 5.3.4.1 (Protein disulfide-isomerase 10, PDI10) (Protein disulfide-isomerase like 5-1, AtPDIL5-1)	5.3.4.1			NR	↑	NR	NR	NR	1.06965	0.425502	0.706889	1.75626	0.830462	0.025215	1.0841	1.04968	0.859922	0.988464	0.529033	0.962276	1.13636	0.613776	0.61148	22	8	349	8	0.000338194
HORVU5Hr1G067710	Jasmonate-induced protein, putative|none|PF01419|IPR001229	AT3G21380	Jacalin-related lectin 36				↓	↓	↓	NR	↓	0.494793	0.29128	0.0187563	0.522365	0.308258	0.0269093	0.315603	0.223654	0.00232318	0.67341	0.394542	0.143777	0.14102	0.202891	0.000467592	54	5	223	2	0.000204697
HORVU5Hr1G069850	Glucose-6-phosphate isomerase	AT4G24620	Glucose-6-phosphate isomerase 1, chloroplastic, GPI 1, EC 5.3.1.9 (Phosphoglucose isomerase 1, PGI 1) (Phosphohexose isomerase, PHI)	5.3.1.9			↓	↓	↓	NR	↓	0.258258	0.186705	0.000229432	0.501196	0.263383	0.00756719	0.311398	0.149961	0.000207278	1.02428	0.429731	0.901221	0.511526	0.286897	0.0112795	17	6	156	6	0.000164305
HORVU5Hr1G073450	NAD(P)-binding Rossmann-fold superfamily protein	AT5G10730	NAD(P)-bd_dom domain-containing protein			Hoth et al. 2003	↓	NR	NR	↓	NR	0.411993	0.283108	0.0240819	0.683138	0.480142	0.249957	0.530594	0.297134	0.0539201	0.470569	0.257868	0.0305432	0.709269	0.4185	0.242513	23	5	155	5	0.000173889
HORVU5Hr1G073650	chr5H:540515715-540516393 HC_U|Protein of unknown function, DUF538|none|PF04398|IPR007493	AT1G09310	T31J12.3 protein				↑	NR	NR	NR	NR	4.31317	5.40924	0.0174221	1.00641	1.45306	0.992289	0.334314	0.600963	0.251429	1.0525	1.57556	0.940403	1.4439	1.89032	0.517418	20	2	88	2	9.37907e-05
HORVU5Hr1G075490	Peptidyl-prolyl cis-trans isomerase	AT3G25220	Peptidyl-prolyl cis-trans isomerase FKBP15-1, PPIase FKBP15-1, EC 5.2.1.8 (15 kDa FK506-binding protein, 15 kDa FKBP) (FK506-binding protein 15-1, AtFKBP15-1) (FK506-binding protein 2-1) (Immunophilin FKBP15-1) (Rotamase)	5.2.1.8	Černý et al., 2014	Brenner et al., 2005	↓	↓	NR	↓	NR	0.115692	0.163914	0.000232499	0.395113	0.3377	0.0125153	0.78942	0.580704	0.459612	0.226376	0.175195	0.000637175	0.732459	0.434786	0.245678	27	3	88	3	9.17369e-05
HORVU5Hr1G076130	Proteasome subunit beta type-1	AT3G60820	Proteasome subunit beta type-1, EC 3.4.25.1 (20S proteasome beta subunit F-1) (Proteasome component 5) (Proteasome subunit beta type-6) (TAS-F22/FAFP98) (TAS-G39.20)	3.4.25.1			↓	NR	NR	NR	NR	0.530369	0.327315	0.0150431	0.680323	0.42707	0.139551	0.764514	0.247079	0.080562	0.888987	0.208405	0.291348	0.891734	0.236513	0.353912	75	5	396	5	0.000366263
HORVU5Hr1G078400	Heat shock 70 kDa protein C|none|PF00012|IPR013126, IPR018181, IPR029047, IPR029048	AT5G42020	Heat shock 70 kDa protein BIP2 (Heat shock 70 kDa protein 12) (Heat shock protein 70-12, AtHsp70-12) (Luminal-binding protein 2, AtBP2, BiP2)		Žďárská et al., 2013	Hoth et al. 2003	↓	NR	NR	NR	NR	0.641826	0.18845	0.00760009	0.860454	0.184571	0.167286	0.829623	0.451928	0.431528	0.797017	0.252035	0.133722	0.778865	0.269486	0.125605	11	9	892	2	0.000797563
HORVU5Hr1G078540	2Fe-2S ferredoxin-like superfamily protein	AT3G07480	Uncharacterized protein				↓	↓	NR	↓	↓	0.607256	0.303159	0.0289683	0.617011	0.215497	0.00993005	0.889239	0.284215	0.427544	0.554156	0.338676	0.0253745	0.598927	0.242265	0.0120888	23	3	288	3	0.000261519
HORVU5Hr1G078810	Proteasome subunit beta type-4	AT1G56450	Proteasome subunit beta type-4, EC 3.4.25.1 (20S proteasome beta subunit G-1) (Proteasome component H) (Proteasome subunit beta type-7)	3.4.25.1	Žďárská et al., 2013		↓	NR	NR	NR	NR	0.678169	0.233534	0.0310642	0.946677	0.297941	0.705681	0.749407	0.241126	0.0768993	1.27384	0.448712	0.167475	0.902051	0.248986	0.432135	48	9	497	9	0.000468954
HORVU5Hr1G079230	GDP-D-mannose 3',5'-epimerase	AT5G28840	GDP-mannose 3,5-epimerase, GDP-Man 3,5-epimerase, EC 5.1.3.18	5.1.3.18			NR	↑	NR	↑	NR	0.432929	0.631055	0.12535	2.8827	1.99042	0.0211125	2.36316	2.46252	0.205558	3.57661	2.62696	0.0199349	2.73296	2.12401	0.0525667	29	8	85	4	0.000108167
HORVU5Hr1G082190	histone H2A 6	AT1G51060	Probable histone H2A.1 (HTA10)		Zhang et al., 2012	Brenner et al., 2005	↓	NR	NR	NR	NR	0.348087	0.202409	0.0153157	0.990074	0.661093	0.974016	1.36086	0.87803	0.309879	1.37292	0.71812	0.162566	0.997358	0.571019	0.991965	26	4	379	3	0.000346409
HORVU5Hr1G092610	Chaperone protein dnaJ 3	AT3G44110	Chaperone protein dnaJ 3, AtDjA3, AtJ3				NR	NR	NR	NR	↑	1.17311	0.845515	0.618284	0.920217	0.73337	0.822228	1.29432	1.24927	0.57578	1.67527	1.29757	0.156628	2.25282	1.47747	0.00419891	29	6	259	5	0.000271788
HORVU5Hr1G092630	60S ribosomal protein L5-1	AT3G25520	60S ribosomal protein L5-1, Ribosomal protein L5 A (Protein ASYMMETRIC LEAVES1/2 ENHANCER 6) (Protein OLIGOCELLULA 5) (Protein PIGGYBACK 3)				NR	NR	NR	↑	NR	1.03464	0.16936	0.648935	1.21902	0.357881	0.184615	0.774111	0.305361	0.143879	1.40536	0.267446	0.00254928	0.875061	0.412684	0.519486	35	9	1339	6	0.00111385
HORVU5Hr1G092920	Pyruvate dehydrogenase E1 component subunit beta	AT1G30120	Pyruvate dehydrogenase E1 component subunit beta-2, chloroplastic, EC 1.2.4.1	1.2.4.1			NR	NR	NR	NR	↑	0.52224	0.478424	0.144714	1.15476	0.967947	0.712464	1.25856	0.898742	0.481505	1.18932	0.984784	0.654107	1.9575	1.24047	0.0244665	16	5	208	5	0.000213596
HORVU5Hr1G093770	lipoxygenase 1	AT1G17420	Lipoxygenase 3, chloroplastic, AtLOX3, EC 1.13.11.12	1.13.11.12		Nishiyama et al., 2012	↑	NR	NR	NR	NR	1.51745	0.39917	0.00249735	1.35255	0.468952	0.0861929	0.910476	0.232858	0.447774	1.14298	0.345307	0.339016	0.773271	0.241469	0.10656	19	11	1015	7	0.000870131
HORVU5Hr1G094300	Sulfate adenylyltransferase	AT5G43780	ATP sulfurylase 4, chloroplastic, EC 2.7.7.4	2.7.7.4			NR	NR	NR	NR	↑	1.07649	1.11745	0.877729	0.917456	0.842425	0.839049	0.461601	0.64	0.202377	0.478455	0.392251	0.135368	2.07399	1.63242	0.046356	26	7	127	7	0.000152667
HORVU5Hr1G095080	Beta-glucosidase C	AT5G20950	Glycosyl hydrolase family protein			Brenner et al., 2005	↓	↓	NR	NR	NR	0.669347	0.198035	0.00926077	0.69603	0.242222	0.0292249	0.813549	0.375461	0.306009	0.901017	0.205872	0.331591	0.807958	0.182499	0.0623391	25	11	777	6	0.000751695
HORVU5Hr1G096370	UDP-glucose 6-dehydrogenase family protein	AT5G15490	UDP-glucose 6-dehydrogenase 3, UDP-Glc dehydrogenase 3, UDP-GlcDH 3, UDPGDH 3, EC 1.1.1.22 (At-UGD3)	1.1.1.22			NR	NR	NR	↑	NR	1.16282	0.173197	0.0457534	1.1702	0.191489	0.0590719	0.929957	0.262113	0.568187	1.35254	0.219658	0.00227399	1.15844	0.205544	0.0986992	70	25	3416	6	0.00282741
HORVU5Hr1G098890	malate dehydrogenase	AT5G09660	Malate dehydrogenase 2, peroxisomal, EC 1.1.1.37 (Microbody NAD-dependent malate dehydrogenase, mbNAD-MDH) (Peroxisomal NAD-dependent malate dehydrogenase 2, pxNAD-MDH2) (Peroxisomal malate dehydrogenase 2, Peroxisomal MDH2)	1.1.1.37			NR	NR	↓	NR	NR	1.13264	0.464628	0.507057	0.898282	0.452228	0.641929	0.533141	0.342774	0.039116	0.835453	0.43299	0.450565	0.808501	0.374405	0.332783	31	5	225	4	0.00025125
HORVU5Hr1G099820	citrate synthase 3	AT3G58750	Citrate synthase 2, peroxisomal, EC 2.3.3.16	2.3.3.16			NR	↑	NR	NR	NR	0.679251	0.553009	0.260503	2.18388	0.777124	0.000191085	0.367345	0.586524	0.0572165	1.20245	1.58459	0.778969	1.11568	1.03509	0.805456	28	7	68	7	8.83139e-05
HORVU5Hr1G100900	tubulin beta-5 chain	AT1G20010	Tubulin beta-5 chain (Beta-5-tubulin)		Černý et al., 2011		↑	NR	NR	NR	NR	1.81329	0.747978	0.00155912	1.45015	0.625728	0.051829	0.756813	0.661112	0.463179	1.21912	0.583319	0.358687	0.829131	0.591992	0.560404	34	13	1209	3	0.00112275
HORVU5Hr1G100910	Inosine-5'-monophosphate dehydrogenase	AT1G16350	Inosine-5'-monophosphate dehydrogenase 2, IMP dehydrogenase 2, IMPD 2, IMPDH 2, EC 1.1.1.205	1.1.1.205			↓	NR	NR	↓	NR	0.677422	0.216714	0.0294007	0.787877	0.236502	0.123584	0.764622	0.210696	0.0752045	0.724145	0.213796	0.0484213	0.77219	0.219796	0.0896309	64	14	975	14	0.00092353
HORVU5Hr1G103180	Ferredoxin--NADP reductase	AT1G30510	Ferredoxin--NADP reductase, root isozyme 2, chloroplastic, EC 1.18.1.2 (Root FNR 2, AtRFNR2)	1.18.1.2		Brenner et al., 2005 | Brenner et al., 2012	↓	↓	NR	↓	NR	0.363402	0.180119	0.000919828	0.499944	0.301863	0.0147126	0.70611	0.365106	0.140893	0.518359	0.245144	0.00920645	0.71207	0.492412	0.249629	10	2	193	2	0.000184158
HORVU5Hr1G103420	Glutathione S-transferase family protein	AT1G17180	Glutathione S-transferase U25, AtGSTU25, EC 2.5.1.18 (GST class-tau member 25)	2.5.1.18			NR	NR	↑	↓	↑	0.565722	0.600164	0.205619	0.592664	0.704217	0.282563	2.20501	1.16992	0.00325745	0.301731	0.248924	0.0130198	2.07061	1.08182	0.00427362	25	3	287	2	0.000251934
HORVU5Hr1G103430	Glutathione S-transferase family protein	AT1G17170	Glutathione S-transferase U24, AtGSTU24, EC 2.5.1.18 (GST class-tau member 24)	2.5.1.18			NR	NR	↑	NR	↑	1.29298	0.314181	0.0327889	0.968241	0.364963	0.851082	1.50186	0.371432	0.00314165	0.914852	0.198537	0.397393	1.62532	0.364636	0.000235335	75	15	2489	14	0.0020408
HORVU5Hr1G104630	Vicilin	AT3G22640	Vicilin-like seed storage protein At3g22640 (Globulin At3g22640)				↓	NR	NR	NR	NR	0.0845373	0.078263	0.0159132	2.47177	2.98135	0.220815	1.12024	0.848995	0.734471	0.610579	0.512709	0.277317	1.05088	1.08666	0.916843	55	22	1551	22	0.00131992
HORVU5Hr1G104700	glutamate dehydrogenase 1	N/A	N/A	1.4.1.2			↑	NR	NR	NR	NR	1.50906	0.357931	0.00340246	1.1373	0.394932	0.441866	0.921371	0.20898	0.442276	1.07561	0.197429	0.381937	1.01728	0.18377	0.835141	60	15	1767	14	0.00156432
HORVU5Hr1G105750	PITH domain-containing protein|none|PF06201|IPR008979, IPR010400	AT3G04780	PITH domain-containing protein At3g04780				NR	NR	NR	NR	↑	1.39948	0.657651	0.156961	1.22612	0.568112	0.357328	0.865538	0.394222	0.494033	0.850852	0.416641	0.473001	1.5748	0.602163	0.0210346	39	5	194	5	0.000210858
HORVU5Hr1G106730	histone H1-3	AT2G30620	Histone H1.2				NR	NR	↑	NR	NR	1.08527	0.327793	0.56403	1.22376	0.492246	0.318826	1.5119	0.317377	0.0010058	1.19474	0.302626	0.151983	1.06968	0.218999	0.473039	10	3	517	2	0.000425824
HORVU5Hr1G109340	chr5H:629626354-629676590 HC_TE?|ATP-dependent RNA helicase DED1	AT2G42520	DEAD-box ATP-dependent RNA helicase 37, EC 3.6.4.13	3.6.4.13			↑	NR	NR	↑	NR	1.48597	0.449959	0.0161197	1.13816	0.362383	0.386487	0.948263	0.543055	0.83696	1.5898	0.472978	0.00627566	1.34471	0.554135	0.166074	46	17	654	15	0.00069145
HORVU5Hr1G110370	RNA-binding protein 1	AT5G61030	Glycine-rich RNA-binding protein 3, mitochondrial, AtGR-RBP3 (AtRBG3) (Mitochondrial RNA-binding protein 2a, At-mRBP2a) (Organelle RRM domain-containing protein 3)			Brenner et al., 2005	↓	↓	↓	NR	↓	0.0968714	0.140397	0.00134031	0.154955	0.168881	0.00229582	0.205144	0.248932	0.00503333	0.416506	0.609406	0.103611	0.37566	0.30768	0.0209876	19	2	86	2	9.24215e-05
HORVU5Hr1G111620	methylenetetrahydrofolate reductase 2	AT2G44160	Methylenetetrahydrofolate reductase 2, AtMTHFR2, EC 1.5.1.20	1.5.1.20			↑	↑	NR	NR	NR	1.37802	0.266994	0.00524524	1.39132	0.224376	0.000877188	0.687779	0.351861	0.0840001	1.08172	0.209586	0.388885	1.05547	0.186261	0.509206	30	15	1133	15	0.000992675
HORVU5Hr1G111820	40S ribosomal protein S26	AT3G56340	40S ribosomal protein S26-3				NR	↑	↑	↑	↑	0.924882	0.465294	0.737177	1.64229	0.673018	0.0110659	1.59509	0.691977	0.0262252	2.00162	1.14593	0.0388798	1.69814	0.842762	0.0411878	43	5	460	5	0.000406655
HORVU5Hr1G111920	Serpin-Z7|none|PF00079|IPR023795, IPR023796	AT1G47710	Serpin-ZX (ArathZx) (AtSerpin1) (Serpin-1)				↓	NR	NR	NR	NR	0.641484	0.301017	0.02879	0.976503	0.432519	0.905881	0.97371	0.482929	0.905669	1.00261	0.505676	0.99102	1.14206	0.465294	0.50625	49	15	1792	13	0.0015294
HORVU5Hr1G112850	Dihydrolipoyllysine-residue acetyltransferase component of pyruvate dehydrogenase complex	AT3G25860	Dihydrolipoyllysine-residue acetyltransferase component 4 of pyruvate dehydrogenase complex, chloroplastic, EC 2.3.1.12 (Dihydrolipoamide S-acetyltransferase component 4 of pyruvate dehydrogenase complex) (Pyruvate dehydrogenase complex component E2 4, PDC-E2 4, PDCE2 4, plE2)	2.3.1.12			↓	NR	↓	NR	NR	0.610287	0.190553	0.0046855	0.923626	0.203718	0.447063	0.726757	0.227503	0.0411423	0.983367	0.234229	0.878238	1.11716	0.24709	0.279533	21	7	524	6	0.000502499
HORVU5Hr1G113060	actin depolymerizing factor 4	AT1G01750	Actin-depolymerizing factor 10, ADF-10, AtADF10			Brenner et al., 2005 | Nishiyama et al., 2012	↓	NR	NR	NR	NR	0.621593	0.21348	0.0107077	1.09088	0.594402	0.736437	1.03185	0.300728	0.81465	0.915632	0.300239	0.558988	0.598016	0.41196	0.0713095	42	7	373	7	0.000364209
HORVU5Hr1G113880	Alpha-mannosidase	AT3G26720	Alpha-mannosidase At3g26720, EC 3.2.1.24	3.2.1.24			↓	NR	NR	↓	↓	0.537817	0.204604	0.00304995	0.803719	0.259304	0.155654	0.824192	0.362615	0.325552	0.468684	0.265415	0.00401197	0.579407	0.2115	0.00564557	6	5	462	5	0.000422401
HORVU5Hr1G115100	GRAM domain-containing protein / ABA-responsive protein-related|none|PF02893|IPR004182	AT5G13200	GEM-like protein 5				NR	↑	↑	↑	↑	1.32475	0.701097	0.206674	2.8357	1.97455	0.0159929	2.3901	1.48671	0.00959065	2.14512	1.16654	0.00224386	2.30117	1.41643	0.0103918	15	5	232	5	0.000218389
HORVU5Hr1G122350	Elongation factor Tu	AT4G02930	Elongation factor Tu, mitochondrial				↓	NR	NR	NR	NR	0.684274	0.162091	0.00392398	0.917028	0.27573	0.523838	0.888333	0.218656	0.29749	0.96631	0.274119	0.79066	0.930083	0.177458	0.415849	65	12	1196	12	0.00108167
HORVU5Hr1G125130	60 kDa chaperonin 2	AT5G18820	Chaperonin 60 subunit alpha 2, chloroplastic, CPN-60 alpha 2 (Protein EMBRYO DEFECTIVE 3007)				↓	NR	NR	NR	NR	0.734407	0.127562	0.00275189	0.939604	0.271688	0.633551	0.960786	0.143343	0.564141	0.96084	0.144901	0.568579	1.06417	0.225501	0.531502	56	25	2243	19	0.00211132
HORVU5Hr1G125810	Kiwellin|none|none|IPR009009	AT4G30380	Putative EG45-like domain containing protein 1 (Plant natriuretic peptide B, AtEXPR2, AtPNP-B, Ath-ExpGamma-1.1)				NR	NR	NR	↓	NR	0.922101	0.358429	0.649596	0.966768	0.414173	0.862884	1.03585	0.402703	0.8439	0.532451	0.195291	0.00502562	0.732024	0.236459	0.0689535	25	5	860	5	0.000718149
HORVU6Hr1G000040	Caffeic acid 3-O-methyltransferase	N/A	N/A				NR	NR	NR	↑	NR	1.48546	0.826359	0.134441	1.38576	0.734028	0.179304	0.918661	0.645158	0.791147	1.85491	0.909833	0.00866042	1.20877	0.568283	0.355046	40	10	642	6	0.00061409
HORVU6Hr1G008640	catalase 1	AT1G20620	Catalase-3, EC 1.11.1.6	1.11.1.6			↑	NR	NR	NR	NR	1.37199	0.42913	0.0442336	1.16519	0.342214	0.259472	1.3371	0.505917	0.129618	1.02278	0.359671	0.889011	0.843963	0.222087	0.206578	33	6	457	5	0.000444308
HORVU6Hr1G008880	Heat shock 70 kDa protein C|none|PF00012|IPR013126, IPR018181, IPR029047, IPR029048	N/A	N/A				NR	NR	NR	NR	↓	1.02211	0.124023	0.693501	0.945677	0.288423	0.684756	0.728586	0.302012	0.0795872	0.749286	0.203345	0.0200962	0.630026	0.206594	0.00405831	43	31	5582	24	0.00454645
HORVU6Hr1G011020	Histone superfamily protein	AT1G07660	Histone H4				NR	↑	NR	↑	↑	0.87704	0.268185	0.362291	1.39452	0.356204	0.0115193	1.37055	0.799827	0.309025	1.46617	0.45036	0.0218997	1.35167	0.32946	0.0134905	32	9	1856	9	0.00149928
HORVU6Hr1G011120	Glutathione S-transferase family protein	AT4G19880	GST C-terminal domain-containing protein				NR	NR	NR	↓	↑	1.28485	1.14445	0.50535	2.23097	2.1158	0.0588057	0.545326	0.807154	0.36503	0.00541199	0.00454907	0.0244875	4.25057	3.81699	0.000999682	19	6	109	6	0.000130075
HORVU6Hr1G012010	Eukaryotic translation initiation factor 3 subunit J-A	AT5G37475	Eukaryotic translation initiation factor 3 subunit J, eIF3j				↓	NR	NR	↓	↓	0.336253	0.287434	0.0104963	0.697251	0.442251	0.227408	0.664235	0.364752	0.141883	0.258173	0.191019	0.0031531	0.469908	0.373718	0.0434956	34	5	196	5	0.000213596
HORVU6Hr1G012700	Bifunctional protein FolD 2	AT4G00620	Bifunctional protein FolD 4, chloroplastic (Protein EMBRYO DEFECTIVE 3127) (Tetrahydrofolate dehydrogenase/cyclohydrolase 4) [Includes: Methylenetetrahydrofolate dehydrogenase, EC 1.5.1.5; Methenyltetrahydrofolate cyclohydrolase, EC 3.5.4.9]	1.5.1.5			NR	NR	↓	NR	NR	0.586428	0.421158	0.112457	0.647172	0.378464	0.135644	0.349707	0.249099	0.00901008	0.769352	0.491412	0.373742	0.871276	0.446947	0.568541	15	3	147	3	0.000152667
HORVU6Hr1G013710	Plant basic secretory protein (BSP) family protein|none|PF04450|IPR007541	AT2G15220	Uncharacterized protein			Nishiyama et al., 2012 | Bahargava et al., 2013	↑	NR	NR	NR	↓	1.46464	0.318871	0.00270182	0.977306	0.324175	0.879452	1.07388	0.218861	0.446812	0.880187	0.18125	0.206273	0.683603	0.215068	0.0171482	80	16	2215	15	0.00184295
HORVU6Hr1G013800	NADP-dependent D-sorbitol-6-phosphate dehydrogenase	AT2G21260	Aldo_ket_red domain-containing protein				NR	NR	NR	↓	NR	0.913146	0.147874	0.225297	1.18119	0.125559	0.00658336	0.794897	0.0952104	0.00124776	0.714882	0.181578	0.00672621	0.975593	0.273202	0.845883	33	10	581	10	0.000581229
HORVU6Hr1G018370	calnexin 1	AT5G61790	Calnexin homolog 1				NR	NR	↓	NR	↓	0.783187	0.320233	0.236086	0.909525	0.595521	0.747911	0.259738	0.304297	0.0042273	0.57125	0.397724	0.0773583	0.356119	0.312862	0.00922758	23	8	401	5	0.000391593
HORVU6Hr1G020750	Calcium-dependent lipid-binding (CaLB domain) family protein	AT3G54000	Uncharacterized protein				NR	NR	↑	NR	NR	0.466144	0.358076	0.085168	1.08949	0.880245	0.817357	2.26488	1.43083	0.00599551	0.44834	0.591018	0.147407	0.605566	0.488757	0.218459	20	4	372	4	0.000352571
HORVU6Hr1G021750	Protein phosphatase 2C family protein	AT5G10740	Probable protein phosphatase 2C 69, AtPP2C69, EC 3.1.3.16	3.1.3.16			NR	NR	↓	NR	↓	1.07564	0.319402	0.595379	0.722611	0.275968	0.0747103	0.397257	0.418365	0.0151408	0.781163	0.201171	0.0688779	0.416656	0.316276	0.00543667	18	4	210	4	0.000222496
HORVU6Hr1G025270	T-complex protein 1 subunit eta	AT3G11830	T-complex protein 1 subunit eta, TCP-1-eta (CCT-eta) (Chaperonin CCT7)				NR	↑	NR	↑	NR	1.01448	0.489143	0.948115	1.83949	0.843838	0.0136341	0.646049	0.62666	0.275268	2.07666	0.964994	0.006354	1.4848	0.708297	0.0932198	40	13	429	13	0.000438831
HORVU6Hr1G026810	Glutathione S-transferase family protein	AT1G10360	Glutathione S-transferase U18, AtGSTU18, EC 2.5.1.18 (GST class-tau member 18) (Glutathione S-transferase 29)	2.5.1.18			NR	NR	NR	↓	↑	0.987618	0.483541	0.955758	0.718464	0.342656	0.166571	0.947212	0.365841	0.764287	0.000405662	0.000143608	8.7501e-05	2.56245	0.91948	3.80216e-06	59	11	1087	11	0.000955707
HORVU6Hr1G031480	Aldehyde dehydrogenase family 2 member C4	AT1G23800	Aldehyde dehydrogenase family 2 member B7, mitochondrial, ALDH2b, EC 1.2.1.3	1.2.1.3			NR	NR	↓	NR	NR	0.935214	0.297681	0.651416	1.12284	0.577503	0.63594	0.399695	0.342279	0.00889398	1.09449	0.414259	0.607464	0.779782	0.234935	0.113671	19	7	432	7	0.00041487
HORVU6Hr1G031580	Histone superfamily protein	AT1G09200	Histone H3.2 (Histone H3.1)				↑	NR	NR	NR	NR	1.42166	0.316931	0.00932815	1.06793	0.24301	0.53928	1.17181	0.284736	0.193361	1.05852	0.152582	0.394306	1.06882	0.215406	0.482081	31	8	2655	3	0.00199083
HORVU6Hr1G035420	cinnamyl alcohol dehydrogenase 5	AT3G19450	Cinnamyl alcohol dehydrogenase 4, AtCAD4, EC 1.1.1.195 (Cinnamyl alcohol dehydrogenase C)	1.1.1.195			↑	NR	NR	NR	↑	1.72654	0.78363	0.0413708	1.7589	0.931004	0.0746541	1.25458	1.08131	0.604161	1.23487	0.765548	0.495444	1.76472	0.617921	0.00589387	27	8	261	8	0.000282741
HORVU6Hr1G037940	Alba DNA/RNA-binding protein	N/A	N/A				NR	NR	NR	NR	↓	0.828394	0.388795	0.384564	0.655774	0.477367	0.174142	0.430766	0.632795	0.0931079	0.768737	0.25041	0.129185	0.21315	0.234134	0.000769442	48	5	170	2	0.000175943
HORVU6Hr1G039440	allene oxide synthase	AT5G42650	Allene oxide synthase, chloroplastic, EC 4.2.1.92 (Cytochrome P450 74A) (Hydroperoxide dehydrase)	4.2.1.92			NR	NR	↓	NR	NR	1.22388	0.334271	0.141203	0.945323	0.445148	0.790655	0.680434	0.262868	0.0331293	0.79683	0.392617	0.288279	0.786698	0.459697	0.334956	3	2	197	2	0.000186897
HORVU6Hr1G058820	phenylalanine ammonia-lyase 2	AT2G37040	Phenylalanine ammonia-lyase 1, EC 4.3.1.24	4.3.1.24	Zhang et al., 2012		↑	NR	NR	↑	↑	1.76072	0.452472	0.000221964	1.18733	0.369051	0.24333	0.870882	0.244974	0.310426	1.39506	0.396445	0.0219183	1.41536	0.342157	0.00411809	62	32	2249	29	0.00205381
HORVU6Hr1G061010	Hsp70-Hsp90 organizing protein	AT1G62740	Hsp70-Hsp90 organizing protein 2, AtHop2				NR	NR	↑	NR	NR	0.919758	0.433071	0.700824	1.06384	0.400668	0.715427	1.99971	0.747471	0.000557597	0.944129	0.359167	0.747021	1.13907	0.426681	0.435705	32	16	751	13	0.000733211
HORVU6Hr1G064720	high mobility group B3|none|PF00505|IPR009071	AT2G17560	High mobility group B protein 4 (High mobility group protein G, AtHMGgamma, HMG gamma) (Nucleosome/chromatin assembly factor group D 04, Nucleosome/chromatin assembly factor group D 4)				NR	NR	NR	↓	NR	1.18274	0.285753	0.142493	0.766027	0.38654	0.227735	0.855356	0.319287	0.35775	0.676628	0.246417	0.0302471	0.924534	0.200748	0.44985	32	5	668	5	0.000590128
HORVU6Hr1G070270	ATP-dependent 6-phosphofructokinase 7	AT1G12000	Pyrophosphate--fructose 6-phosphate 1-phosphotransferase subunit beta 1, PFP 1, EC 2.7.1.90 (6-phosphofructokinase, pyrophosphate dependent 1) (PPi-PFK 1) (Pyrophosphate-dependent 6-phosphofructose-1-kinase 1)	2.7.1.90			NR	NR	NR	NR	↑	1.10756	0.765246	0.742721	1.70803	1.35809	0.176822	0.733195	0.704872	0.478104	2.33736	1.96119	0.0777758	2.16423	1.5138	0.0280266	9	5	104	5	0.00012939
HORVU6Hr1G070780	ADP,ATP carrier protein, mitochondrial	AT5G13490	ADP,ATP carrier protein 2, mitochondrial (ADP/ATP translocase 2) (Adenine nucleotide translocator 2, ANT 2)			Hoth et al. 2003	↓	NR	↓	↓	↓	0.494905	0.154687	0.000217793	0.975866	0.3395	0.877407	0.571581	0.250897	0.00631267	0.664044	0.179627	0.00511122	0.701878	0.131803	0.00267973	32	10	1046	10	0.000951599
HORVU6Hr1G074200	Dihydroorotate dehydrogenase (quinone)	AT3G17810	Dihydropyrimidine dehydrogenase (NADP(+)), chloroplastic, DHPDH, DPD, EC 1.3.1.2 (Dihydroorotate dehydrogenase-like protein) (Dihydrothymine dehydrogenase) (Dihydrouracil dehydrogenase) (Protein PYRIMIDINE 1)	1.3.1.2			↑	NR	NR	NR	NR	1.515	0.338105	0.00103751	1.3743	0.426752	0.0542354	1.20175	0.327263	0.163002	0.825198	0.411534	0.380905	0.779785	0.224352	0.0835596	38	10	713	10	0.000653797
HORVU6Hr1G074440	annexin 7	AT5G10230	Annexin D7 (AnnAt7)				↑	↑	↓	↑	↑	2.07335	0.618514	0.00187967	1.65878	0.664226	0.0448249	0.583618	0.311351	0.0175945	1.42625	0.409135	0.0339436	1.50847	0.408047	0.0138866	37	12	637	12	0.000646266
HORVU6Hr1G074940	Lipase/lipooxygenase, PLAT/LH2 family protein	AT4G39730	PLAT domain-containing protein 1, AtPLAT1, PLAT domain protein 1				↑	NR	NR	NR	NR	1.55803	0.651725	0.0440548	1.51663	0.702657	0.0883263	1.03054	0.502221	0.893332	1.19765	0.434843	0.279191	0.797897	0.399417	0.327758	15	3	350	2	0.000303964
HORVU6Hr1G075010	beta-D-xylosidase 4	AT1G78060	Probable beta-D-xylosidase 7, AtBXL7, EC 3.2.1.-	3.2.1.-		Brenner et al., 2005	↓	↓	NR	NR	↓	0.639536	0.213687	0.0101047	0.703777	0.19294	0.0169905	0.678945	0.317123	0.0632746	0.823683	0.283765	0.2205	0.621639	0.198169	0.00597123	17	10	542	10	0.00056069
HORVU6Hr1G077340	Peptidyl-prolyl cis-trans isomerase	AT5G64350	Peptidyl-prolyl cis-trans isomerase FKBP12, PPIase FKBP12, EC 5.2.1.8 (12 kDa FK506-binding protein, 12 kDa FKBP) (FK506-binding protein 12, AtFKBP12) (FKBP-12) (Immunophilin FKBP12) (Rotamase)	5.2.1.8	Černý et al., 2014	Brenner et al., 2012	↓	NR	↑	↓	NR	0.29559	0.426532	0.0162093	0.784904	0.958572	0.635421	2.23148	1.65533	0.0952869	0.144187	0.312757	0.002286	0.925144	0.682451	0.814737	14	2	60	2	6.70912e-05
HORVU6Hr1G077710	heat shock protein 21|none|PF00011|IPR002068, IPR008978	AT4G25200	23.6 kDa heat shock protein, mitochondrial, AtHsp23.6				NR	NR	↑	NR	NR	0.922217	2.78903	0.953508	2.69589	6.95482	0.41175	104.09	224.02	8.03233e-07	2.71089	6.39748	0.291199	0.945493	2.86109	0.967802	29	5	136	5	0.000126652
HORVU6Hr1G078330	alpha-amylase-like	AT4G25000	Alpha-amylase 1, AtAMY1, EC 3.2.1.1 (1,4-alpha-D-glucan glucanohydrolase)	3.2.1.1			↓	NR	↓	NR	NR	0.590587	0.16667	0.00239061	0.84625	0.487605	0.505776	0.653612	0.292543	0.0390385	0.795787	0.391374	0.289344	0.871796	0.43694	0.535597	67	25	3068	17	0.00260218
HORVU6Hr1G079030	temperature-induced lipocalin	AT5G58070	Temperature-induced lipocalin-1, AtTIL1				NR	NR	↑	NR	↑	1.22335	0.260598	0.0599075	0.829062	0.306962	0.259156	1.5278	0.439046	0.0143506	1.03141	0.227078	0.759778	1.36303	0.375213	0.0405856	20	3	308	3	0.000284111
HORVU6Hr1G079150	Adenine nucleotide alpha hydrolases-like superfamily protein	AT3G03270	Usp domain-containing protein			Li et al., 2010	↑	NR	↑	NR	NR	1.71129	0.769436	0.0186265	1.3223	0.611886	0.195136	2.93776	1.43863	0.00147816	1.26487	0.598041	0.283841	1.23548	0.520229	0.262673	16	2	185	2	0.00016362
HORVU6Hr1G080750	Ferredoxin--nitrite reductase	AT2G15620	Ferredoxin--nitrite reductase, chloroplastic, NiR, EC 1.7.7.1	1.7.7.1			↓	↓	↓	NR	NR	0.422201	0.269999	0.0103131	0.474067	0.273349	0.0158558	0.43066	0.278103	0.011796	0.605235	0.507502	0.155953	0.659613	0.623404	0.285048	11	5	135	5	0.000144451
HORVU6Hr1G080770	Lipid-binding protein	AT5G42890	Sterol carrier protein 2, AtSCP2		Černý et al., 2013		↓	NR	NR	↓	NR	0.26283	0.131479	2.40602e-05	1.20127	0.693585	0.524366	1.29667	0.418792	0.119021	0.42493	0.174995	0.000361413	0.955935	0.326522	0.77213	53	4	147	4	0.00016362
HORVU6Hr1G080790	alpha-amylase-like	AT4G25000	Alpha-amylase 1, AtAMY1, EC 3.2.1.1 (1,4-alpha-D-glucan glucanohydrolase)	3.2.1.1			↓	NR	↓	NR	NR	0.581332	0.159739	0.00108249	0.877574	0.531131	0.621066	0.614667	0.283048	0.0195069	0.809438	0.366493	0.28648	0.889615	0.467674	0.613438	65	19	2679	12	0.00231054
HORVU6Hr1G081640	Subtilisin-like protease	AT3G14067	Subtilisin-like protease SBT1.4, EC 3.4.21.- (Subtilase subfamily 1 member 4, AtSBT1.4)	3.4.21.-			↑	NR	NR	NR	↓	3.03823	2.94864	0.0374824	2.13896	2.07959	0.110684	0.575087	0.939057	0.423242	0.667436	0.808437	0.473309	0.167784	0.285149	0.0477944	17	4	148	4	0.000144451
HORVU6Hr1G083150	26S protease regulatory subunit 7	AT1G53750	26S proteasome regulatory subunit 7 homolog A (26S proteasome AAA-ATPase subunit RPT1a) (26S proteasome subunit 7 homolog A) (Regulatory particle triple-A ATPase subunit 1a)				NR	NR	NR	↑	NR	1.00099	0.318497	0.99461	1.40223	0.589667	0.1075	0.929218	0.688228	0.825011	1.68732	0.629021	0.00894614	1.39322	0.52203	0.0687415	23	9	429	8	0.000419662
HORVU6Hr1G083960	Dehydrin	AT3G50970	Dehydrin Xero 2 (Low-temperature-induced protein LTI30)			Hoth et al. 2003 | Brenner et al., 2012	↑	NR	NR	NR	NR	1.70605	0.615093	0.0133887	0.723056	0.526084	0.286109	1.08734	0.557516	0.729328	0.998394	0.365931	0.992365	1.42518	0.502104	0.0581511	13	3	208	3	0.000189635
HORVU6Hr1G084640	membrane-associated progesterone binding protein 2|none|PF00173|IPR001199	AT2G24940	Probable steroid-binding protein 3, AtMP3 (Membrane-associated progesterone-binding protein 2, AtMAPR2)				NR	NR	NR	↓	NR	0.699503	0.511746	0.250028	0.940726	0.792277	0.871406	0.913534	0.465911	0.695518	0.368753	0.330808	0.00748874	0.726744	0.291401	0.111669	47	4	154	4	0.000162936
HORVU6Hr1G084960	Leucine aminopeptidase 1	N/A	N/A				↓	NR	↓	NR	↓	0.709299	0.144449	0.00242562	0.798519	0.108039	0.0046929	0.542341	0.116777	3.50396e-05	0.912346	0.190746	0.339301	0.676957	0.102591	0.000206949	57	22	1787	22	0.00166153
HORVU6Hr1G088420	2-oxoglutarate (2OG) and Fe(II)-dependent oxygenase superfamily protein	AT1G49390	2-oxoglutarate (2OG) and Fe(II)-dependent oxygenase superfamily protein				↑	NR	NR	NR	NR	3.65795	3.12437	0.00227379	1.92978	1.65225	0.0702465	0.495892	0.700019	0.275375	0.794391	0.802605	0.632976	0.675235	0.736829	0.456238	19	3	129	3	0.000125967
HORVU6Hr1G089510	germin-like protein 5	AT1G02335	Germin-like protein subfamily 2 member 2				↓	NR	↓	NR	↓	0.327109	0.214617	0.0054675	0.622811	0.441158	0.14695	0.485144	0.306597	0.0308978	0.702409	0.468303	0.24962	0.407434	0.32986	0.0212181	10	2	135	2	0.000143082
HORVU6Hr1G089570	germin-like protein 5	AT1G02335	Germin-like protein subfamily 2 member 2				↓	NR	NR	NR	↓	0.611174	0.217998	0.0144513	0.746093	0.24106	0.0813286	0.900353	0.317853	0.522166	0.916789	0.249189	0.504004	0.687207	0.19641	0.0258286	51	5	843	5	0.000696927
HORVU6Hr1G089780	glutathione reductase	AT3G24170	Glutathione reductase, cytosolic, GR, GRase, EC 1.8.1.7 (OBP29)	1.8.1.7			NR	NR	NR	NR	↑	0.854968	0.361799	0.400026	0.842147	0.402966	0.409354	0.757619	0.303894	0.118317	1.17687	0.326654	0.237855	2.21684	0.811387	0.00513501	36	6	294	6	0.00029301
HORVU6Hr1G091250	Voltage-gated potassium channel subunit beta-1	AT1G04690	Probable voltage-gated potassium channel subunit beta (K(+) channel subunit beta) (Potassium voltage beta 1, KV-beta1)		Halmark et al., 2020		↑	↑	NR	NR	↑	1.58873	0.465425	0.00391687	1.40635	0.393506	0.014905	0.748038	0.266509	0.101505	1.27989	0.36469	0.0691	1.52143	0.477454	0.0127944	39	7	486	7	0.000470323
HORVU6Hr1G091860	rRNA/tRNA 2'-O-methyltransferase fibrillarin-like protein 1	AT5G52470	rRNA 2'-O-methyltransferase fibrillarin 1, AtFbr1, AtFib1, EC 2.1.1.- (Fibrillarin-like protein 1) (Histone-glutamine methyltransferase) (SKP1-interacting partner 7)	2.1.1.-			↓	NR	NR	NR	NR	0.636052	0.191598	0.00875912	1.02224	0.317026	0.877252	0.729589	0.260994	0.0696615	1.01862	0.371243	0.912401	0.890265	0.263522	0.401793	35	8	694	5	0.000669542
HORVU6Hr1G091950	Aconitate hydratase 1	AT2G05710	Aconitate hydratase 3, mitochondrial, Aconitase 3, mACO1, EC 4.2.1.3 (Citrate hydro-lyase 3)	4.2.1.3			NR	NR	↓	NR	NR	0.778967	0.137551	0.00909306	0.963343	0.144947	0.591361	0.685697	0.16185	0.0029231	1.24512	0.246742	0.0407865	1.0484	0.137801	0.436639	37	24	2373	19	0.00211474
HORVU7Hr1G000250	Acid beta-fructofuranosidase	AT1G12240	Acid beta-fructofuranosidase 4, vacuolar, At beta fruct4, AtBETAFRUCT4, EC 3.2.1.26 (Acid invertase 4, AI 4) (Acid sucrose hydrolase 4) (Vacuolar invertase 4, Inv-V4, VAC-INV 4, VI 4)	3.2.1.26			↓	NR	↓	NR	↑	0.42622	0.179095	0.00609918	0.858486	0.37372	0.464963	0.331383	0.18516	0.00307789	0.989263	0.428553	0.956751	1.72007	0.751073	0.0163411	16	6	281	4	0.000284795
HORVU7Hr1G001040	Acid beta-fructofuranosidase	AT1G12240	Acid beta-fructofuranosidase 4, vacuolar, At beta fruct4, AtBETAFRUCT4, EC 3.2.1.26 (Acid invertase 4, AI 4) (Acid sucrose hydrolase 4) (Vacuolar invertase 4, Inv-V4, VAC-INV 4, VI 4)	3.2.1.26			↑	↑	NR	NR	↓	1.56938	0.669581	0.0339742	1.88846	0.685863	0.00051146	0.614792	0.489676	0.156485	0.905028	0.35746	0.59545	0.560442	0.257894	0.0297327	21	10	383	10	0.000421031
HORVU7Hr1G003710	RNA-binding (RRM/RBD/RNP motifs) family protein	AT5G16840	Binding partner of ACD11 1				↓	NR	NR	NR	NR	0.543912	0.226285	0.00400385	0.793258	0.219408	0.0903904	0.853824	0.306102	0.332434	0.837452	0.294887	0.270723	1.06192	0.331988	0.679416	25	5	355	5	0.000369686
HORVU7Hr1G006490	60 kDa chaperonin 1	AT1G55490	Chaperonin 60 subunit beta 1, chloroplastic, CPN-60 beta 1 (60 kDa chaperonin subunit beta 1) (RuBisCO large subunit-binding protein subunit beta, chloroplastic)				NR	NR	NR	↑	↑	0.965382	0.323752	0.819334	1.15863	0.394163	0.356153	1.38389	0.635186	0.176035	1.5282	0.567387	0.0367303	1.54294	0.397635	0.00119645	38	14	1095	9	0.00103307
HORVU7Hr1G007610	Ozone-responsive stress related protein|none|PF06592|IPR009515	AT1G01170	At1g01170 (Ozone-responsive stress-like protein (DUF1138))				NR	NR	↓	NR	NR	0.800055	0.251283	0.137343	0.701503	0.286435	0.0621236	0.619785	0.27794	0.0229215	0.748938	0.22797	0.0504547	0.914046	0.239454	0.46324	33	3	351	3	0.000323133
HORVU7Hr1G007690	Eukaryotic aspartyl protease family protein|none|PF14541, PF14543|IPR021109, IPR032799, IPR032861	AT1G01300	Aspartyl protease family protein 2, EC 3.4.23.-	3.4.23.-			NR	NR	↓	NR	NR	0.582336	0.389353	0.123987	0.752205	0.415543	0.316587	0.279439	0.177109	0.00926448	0.711847	0.550585	0.344003	0.824972	0.553807	0.541258	22	10	365	10	0.000377901
HORVU7Hr1G009410	Eukaryotic aspartyl protease family protein|none|PF14541, PF14543|IPR021109, IPR032799, IPR032861	AT1G01300	Aspartyl protease family protein 2, EC 3.4.23.-	3.4.23.-		Kiba et al., 2005	↑	NR	NR	NR	NR	1.67935	0.818553	0.0442651	0.918065	0.496906	0.730325	0.497649	0.553638	0.107298	0.697214	0.649225	0.355064	0.622202	0.453729	0.144366	13	5	272	5	0.000275211
HORVU7Hr1G010280	Peroxidase superfamily protein	AT1G05260	Peroxidase 3, Atperox P3, EC 1.11.1.7 (ATPRC) (RCI3A) (Rare cold-inducible protein)	1.11.1.7		Brenner et al., 2005 | Brenner et al., 2012 | Nishiyama et al., 2012	↓	NR	NR	↑	NR	0.500917	0.344378	0.0179423	1.19425	0.657535	0.513534	1.02558	0.723224	0.938373	1.36116	0.394326	0.0372373	1.20444	0.443884	0.299626	6	1	151	2	0.000134867
HORVU7Hr1G013600	Transketolase	AT2G45290	Transketolase-2, chloroplastic, TK, EC 2.2.1.1	2.2.1.1			↑	NR	NR	↑	NR	1.7267	0.418872	0.000742175	1.10499	0.484381	0.633511	0.583715	0.417985	0.061081	1.64804	0.391738	0.00105945	0.967235	0.503764	0.887686	50	18	723	18	0.000730472
HORVU7Hr1G017640	Enolase	AT2G36530	Bifunctional enolase 2/transcriptional activator, EC 4.2.1.11 (2-phospho-D-glycerate hydro-lyase 2) (2-phosphoglycerate dehydratase 2) (LOW EXPRESSION OF OSMOTICALLY RESPONSIVE GENES 1)	4.2.1.11			NR	NR	↑	↑	NR	1.33418	0.52878	0.142316	0.971025	0.436279	0.88618	1.44047	0.497934	0.036209	1.42396	0.475934	0.0335055	1.25579	0.370436	0.0905138	55	16	1293	10	0.00103991
HORVU7Hr1G021430	HXXXD-type acyl-transferase family protein	AT1G31490	HXXXD-type acyl-transferase family protein (N-hydroxycinnamoyl/benzoyltransferase, putative)			Nishiyama et al., 2012	↑	↑	↓	NR	↓	2.4315	1.49524	0.0254196	3.31503	1.91712	0.00547872	0.278056	0.40244	0.0148984	0.611294	0.7971	0.333219	0.00615099	0.00239984	0.00019941	12	2	71	2	7.05142e-05
HORVU7Hr1G021700	3'(2'),5'-bisphosphate nucleotidase	AT5G63980	SAL1 phosphatase (3'(2'),5'-bisphosphate nucleotidase 1, EC 3.1.3.7) (3'(2'),5'-bisphosphonucleoside 3'(2')-phosphohydrolase 1) (DPNPase 1) (Inositol polyphosphate 1-phosphatase 1, IPPase 1) (Inositol-1,4-bisphosphate 1-phosphatase 1, EC 3.1.3.57) (Protein FIERY 1)	3.1.3.7			NR	↓	↓	↓	NR	0.941308	0.575423	0.825662	0.327906	0.259693	0.00117727	0.434678	0.379285	0.0147695	0.553227	0.284482	0.0149431	0.828631	0.354163	0.331954	17	5	93	5	0.000118436
HORVU7Hr1G031850	60S ribosomal protein L35a-3	AT1G74270	60S ribosomal protein L35a-3				↓	NR	NR	NR	NR	0.4291	0.313288	0.00476119	1.14351	0.360426	0.375677	0.708191	0.503369	0.237574	1.1171	0.621492	0.679251	0.819616	0.251092	0.168549	40	4	182	2	0.000160882
HORVU7Hr1G033230	sucrose synthase 4	AT3G43190	Sucrose synthase 4, AtSUS4, EC 2.4.1.13 (Sucrose-UDP glucosyltransferase 4)	2.4.1.13			NR	NR	NR	NR	↓	0.302226	0.665914	0.055511	1.84678	1.44693	0.19889	1.50997	1.91222	0.558546	1.47063	1.82627	0.571676	0.425693	0.441922	0.0312617	13	6	49	6	6.22989e-05
HORVU7Hr1G033900	10 kDa chaperonin	AT5G20720	20 kDa chaperonin, chloroplastic (Chaperonin 10, Ch-CPN10, Cpn10) (Chaperonin 20) (Protein Cpn21)				NR	↓	NR	↓	NR	0.927399	0.215762	0.480931	0.627938	0.184819	0.00296209	1.14979	0.293176	0.263482	0.62937	0.318434	0.0331922	0.894585	0.175295	0.232988	55	8	453	8	0.000446362
HORVU7Hr1G034450	Sulfite reductase [NADPH] hemoprotein beta-component	AT5G04590	Assimilatory sulfite reductase (ferredoxin), chloroplastic, AtSiR, EC 1.8.7.1 (Sulfite reductase (ferredoxin))	1.8.7.1			NR	NR	NR	NR	↑	0.872926	0.44976	0.563063	0.911217	0.565684	0.739329	1.037	0.365221	0.820366	1.044	0.386896	0.798512	1.50397	0.503302	0.0105972	22	6	340	3	0.000338194
HORVU7Hr1G036460	PATATIN-like protein 4	AT2G26560	Patatin-like protein 2, AtPLP2, EC 3.1.1.- (Patatin-related phospholipase A IIalpha, pPLAIIa) (Phospholipase A IIA, AtPLAIIA)	3.1.1.-		Hoth et al. 2003 | Nishiyama et al., 2012	↑	NR	NR	NR	NR	2.39273	0.848207	5.1276e-05	1.2196	0.426843	0.203158	0.727369	0.348523	0.172185	1.17616	0.412283	0.298363	0.670738	0.237478	0.0553096	46	14	1080	11	0.00100021
HORVU7Hr1G036850	Glutathione S-transferase family protein	AT3G62760	Glutathione S-transferase F13, AtGSTF13, EC 2.5.1.18 (GST class-phi member 13)	2.5.1.18			NR	NR	NR	NR	↑	1.23362	0.453526	0.216425	0.817001	0.431091	0.400352	1.35306	0.520988	0.102942	1.21935	0.410651	0.192149	1.7196	0.554541	0.00102643	23	2	590	2	0.000437462
HORVU7Hr1G038520	Nuclear migration protein nudC|none|PF04969|IPR007052, IPR008978	AT5G53400	Protein BOBBER 1				NR	NR	↑	NR	NR	0.974853	0.346731	0.876614	0.875115	0.331533	0.457628	1.46995	0.504789	0.0225198	1.08654	0.472667	0.679921	1.20902	0.414704	0.225829	21	5	697	5	0.000595605
HORVU7Hr1G039930	NAD(P)-linked oxidoreductase superfamily protein	AT1G60690	Probable aldo-keto reductase 3, EC 1.1.1.-	1.1.1.-			↑	NR	NR	NR	NR	1.37694	0.460541	0.0438984	0.766444	0.248572	0.126002	0.814145	0.310152	0.268264	1.0991	0.339769	0.493568	1.18295	0.381802	0.247288	49	13	874	13	0.000892039
HORVU7Hr1G040550	Pyrophosphate--fructose 6-phosphate 1-phosphotransferase	AT1G12000	Pyrophosphate--fructose 6-phosphate 1-phosphotransferase subunit beta 1, PFP 1, EC 2.7.1.90 (6-phosphofructokinase, pyrophosphate dependent 1) (PPi-PFK 1) (Pyrophosphate-dependent 6-phosphofructose-1-kinase 1)	2.7.1.90			NR	NR	NR	↑	NR	0.905557	0.419213	0.644231	1.25229	0.521866	0.242263	0.856865	0.581614	0.609903	1.53466	0.629631	0.0342981	1.22651	0.5713	0.350558	39	16	1458	16	0.00132539
HORVU7Hr1G040730	Cysteine-rich venom protein	AT2G14610	Pathogenesis-related protein 1, PR-1				NR	NR	NR	NR	↓	1.19215	0.236394	0.0743242	0.991708	0.169707	0.915694	0.865665	0.180769	0.155609	0.909436	0.224385	0.404773	0.669077	0.170367	0.00453475	20	2	754	2	0.000581913
HORVU7Hr1G042100	Ubiquitin receptor RAD23	AT3G02540	Ubiquitin receptor RAD23c, AtRAD23c (Putative DNA repair protein RAD23-3) (RAD23-like protein 3, AtRAD23-3)				NR	NR	NR	↓	NR	1.06534	0.408059	0.721717	0.984947	0.256959	0.89962	1.08674	0.465889	0.678931	0.711639	0.219136	0.0406995	1.11793	0.357866	0.453374	23	5	506	5	0.000462108
HORVU7Hr1G045600	Peroxidase superfamily protein	AT1G05260	Peroxidase 3, Atperox P3, EC 1.11.1.7 (ATPRC) (RCI3A) (Rare cold-inducible protein)	1.11.1.7			NR	↓	↓	NR	NR	0.808212	0.404274	0.351867	0.613201	0.286677	0.0404699	0.622207	0.285311	0.0433222	0.845318	0.287681	0.315212	0.545393	0.402941	0.0563607	9	2	155	2	0.000139659
HORVU7Hr1G046280	Thioredoxin domain-containing protein 17|none|PF06110|IPR010357, IPR012336	AT5G42850	Thioredoxin-like protein Clot (Thioredoxin Clot, AtClot)				↓	↓	↓	↓	↓	0.432129	0.281016	0.00249884	0.564247	0.290554	0.0123876	0.521805	0.266477	0.00519638	0.530049	0.296355	0.00926625	0.382065	0.389631	0.0079039	24	4	130	4	0.000146505
HORVU7Hr1G047700	formate dehydrogenase	AT5G14780	Formate dehydrogenase, chloroplastic/mitochondrial, FDH, EC 1.17.1.9 (NAD-dependent formate dehydrogenase)	1.17.1.9			NR	NR	NR	↓	NR	1.07858	0.304114	0.56155	1.15695	0.308897	0.246316	0.66126	0.371739	0.0890722	0.65516	0.186382	0.00976767	1.04925	0.374431	0.771302	42	9	491	9	0.000478538
HORVU7Hr1G049070	caffeoyl-CoA 3-O-methyltransferase	AT4G34050	Caffeoyl-CoA O-methyltransferase 1, EC 2.1.1.104 (Trans-caffeoyl-CoA 3-O-methyltransferase, CCoAMT, CCoAOMT1)	2.1.1.104			NR	↓	↓	NR	NR	0.764291	0.197971	0.0470916	0.609166	0.198379	0.00565619	0.553051	0.251198	0.0071766	0.690577	0.369496	0.109797	0.92338	0.345744	0.638228	54	12	717	12	0.000721572
HORVU7Hr1G050170	60S ribosomal protein L31	AT2G19740	60S ribosomal protein L31-1				NR	NR	↑	NR	NR	0.885629	0.335113	0.468302	1.30143	0.413104	0.124661	1.41474	0.275431	0.00413545	1.08048	0.223441	0.429506	1.19702	0.408724	0.298644	19	4	432	4	0.000363525
HORVU7Hr1G051070	Aminoacylase-1	AT4G38220	Uncharacterized protein	3.5.1.14			↓	NR	↓	↓	NR	0.623534	0.281659	0.0439346	0.828158	0.361991	0.357747	0.528743	0.363066	0.038447	0.633947	0.254092	0.0381193	0.712822	0.334393	0.134357	28	5	167	5	0.00018142
HORVU7Hr1G052350	myosin heavy chain-related|none|none|none	AT4G31340	Myosin heavy chain-like protein			Brenner et al., 2005	↓	NR	↓	NR	NR	0.66514	0.282871	0.0345932	1.17212	0.277018	0.169226	0.616622	0.337574	0.03836	0.757738	0.242985	0.0671266	1.16024	0.303712	0.243722	16	7	368	7	0.000358048
HORVU7Hr1G054440	nuclear transport factor 2A	AT1G27970	Nuclear transport factor 2B, AtNTF2b, NTF-2				↓	NR	↓	NR	NR	0.730115	0.157456	0.00692683	0.810416	0.351958	0.265185	0.719138	0.170475	0.00804125	0.731604	0.175291	0.0113928	0.730199	0.171555	0.0101175	40	5	526	5	0.000501815
HORVU7Hr1G055860	Ankyrin repeat domain-containing protein 2A	AT4G35450	Ankyrin repeat domain-containing protein 2A, AtAKR2				NR	NR	NR	NR	↓	0.601597	0.386707	0.116819	1.15678	1.04351	0.736369	0.879412	0.792047	0.748612	0.610957	0.430716	0.14521	0.367674	0.360448	0.0258055	23	5	142	5	0.000167043
HORVU7Hr1G056910	RNA-binding protein with multiple splicing 2	AT1G76940	Nuclear speckle RNA-binding protein A, AtNSRA				NR	NR	↑	NR	NR	1.06415	0.228935	0.529413	1.01013	0.242604	0.927112	1.38345	0.315951	0.00979108	0.981113	0.256663	0.873634	1.12916	0.327294	0.380134	37	7	798	7	0.000710619
HORVU7Hr1G060130	Superoxide dismutase [Cu-Zn] 4A	AT2G28190	Superoxide dismutase [Cu-Zn] 2, chloroplastic, EC 1.15.1.1 (Copper/zinc superoxide dismutase 2)	1.15.1.1			NR	NR	NR	NR	↑	1.14143	0.939265	0.726483	0.735258	0.855955	0.546363	1.64169	1.43551	0.260497	0.641518	0.598751	0.313925	1.80136	1.19181	0.0443829	34	3	131	3	0.000139659
HORVU7Hr1G061920	14-3-3-like protein GF14-A	N/A	N/A				NR	NR	↓	NR	NR	1.19807	0.210844	0.0545493	0.922657	0.204637	0.423327	0.541178	0.109928	1.37664e-05	0.97893	0.291554	0.875054	0.748641	0.213533	0.0254196	34	10	741	2	0.000644212
HORVU7Hr1G063280	60S ribosomal protein L27-3	AT4G15000	60S ribosomal protein L27-3				↓	NR	NR	NR	↑	0.0793586	0.181516	0.0262641	1.80865	1.63854	0.148351	1.90907	2.09165	0.252409	2.50489	2.51718	0.0891997	1.95864	1.59816	0.0439631	24	3	185	3	0.000192374
HORVU7Hr1G063970	Polyadenylate-binding protein 2	AT4G34110	Polyadenylate-binding protein 2, PABP-2, Poly(A)-binding protein 2				↓	NR	↓	NR	NR	0.722689	0.148959	0.00668108	0.926796	0.176701	0.398505	0.719331	0.236185	0.0355705	0.789385	0.190017	0.0500942	0.953398	0.184607	0.595721	30	12	987	8	0.000934484
HORVU7Hr1G072240	monodehydroascorbate reductase 6	AT1G63940	Monodehydroascorbate reductase, chloroplastic/mitochondrial, EC 1.6.5.4 (Monodehydroascorbate reductase 5, mitochondrial, AtMDAR5) (Monodehydroascorbate reductase 6, chloroplastic, AtMDAR6)	1.6.5.4			NR	NR	↓	NR	NR	0.825802	0.354504	0.331525	0.857542	0.292284	0.342258	0.634769	0.308094	0.0486899	1.18479	0.325753	0.176515	0.710579	0.352139	0.131402	20	7	425	7	0.0004402
HORVU7Hr1G072650	Dihydrolipoyllysine-residue acetyltransferase component of pyruvate dehydrogenase complex	AT3G52200	Dihydrolipoyllysine-residue acetyltransferase component 1 of pyruvate dehydrogenase complex, mitochondrial, EC 2.3.1.12 (Dihydrolipoamide S-acetyltransferase component 1 of pyruvate dehydrogenase complex) (Pyruvate dehydrogenase complex component E2 1, PDC-E2 1, PDCE2 1)	2.3.1.12			NR	NR	↓	NR	NR	0.707515	0.320806	0.129959	0.760904	0.465055	0.320818	0.484986	0.200137	0.008248	0.945529	0.33789	0.738272	1.14412	0.515906	0.519161	21	9	297	9	0.000329979
HORVU7Hr1G073460	Tryptophan synthase beta chain 1	AT4G27070	Tryptophan synthase beta chain 2, chloroplastic, EC 4.2.1.20	4.2.1.20			NR	↑	NR	NR	↑	1.65543	0.844773	0.0722172	1.58075	0.683943	0.0422087	1.28418	0.769661	0.400876	1.03688	0.632808	0.897907	2.48226	1.15674	0.004053	34	8	196	8	0.000228658
HORVU7Hr1G075250	40S ribosomal protein S13-1	AT4G00100	40S ribosomal protein S13-2				NR	NR	NR	↓	↑	1.243	1.13504	0.61271	1.64903	1.43366	0.248553	1.97169	1.75209	0.153036	0.00424347	0.00261402	0.00473247	2.46501	1.82653	0.0201696	17	3	158	3	0.000166359
HORVU7Hr1G080350	chr7H:475182364-475183865 LC_U|Chromosome 3B, genomic scaffold, cultivar Chinese Spring|none|PF04398|IPR007493	N/A	N/A				↓	NR	NR	NR	NR	0.595525	0.199144	0.0117852	1.02199	0.570607	0.932704	0.815418	0.44936	0.405956	1.00945	0.343733	0.951918	1.19403	0.343568	0.172167	46	6	351	5	0.000334087
HORVU7Hr1G080870	Elongation factor Ts	AT4G11120	Elongation factor Ts, mitochondrial, EF-Ts, EF-TsMt				↓	NR	NR	NR	NR	0.559787	0.280694	0.0175948	0.786838	0.416656	0.307644	0.758565	0.313048	0.155717	0.942998	0.400262	0.761452	0.786816	0.226884	0.111281	36	10	399	10	0.000444308
HORVU7Hr1G081910	60S ribosomal protein L37a	AT3G10950	Putative 60S ribosomal protein L37a-1				NR	NR	NR	↑	NR	0.776076	0.310682	0.193727	1.15552	0.399997	0.361932	1.03078	0.340796	0.84051	1.48965	0.554884	0.037228	0.909575	0.331383	0.57849	21	3	358	3	0.000286164
HORVU7Hr1G082240	Translation initiation factor 1A	AT2G04520	S1-like domain-containing protein				NR	NR	↓	NR	↓	0.768761	0.209621	0.0513487	0.68499	0.383952	0.109972	0.443909	0.497482	0.0373209	0.73045	0.406996	0.1834	0.490074	0.194934	0.00079072	33	3	277	3	0.000246457
HORVU7Hr1G082280	O-methyltransferase 1	AT5G54160	Flavone 3'-O-methyltransferase 1, AtOMT1, EC 2.1.1.42 (Acetylserotonin O-methyltransferase OMT1, EC 2.1.1.4) (Caffeate O-methyltransferase 1, EC 2.1.1.68) (Quercetin 3'-O-methyltransferase 1)	2.1.1.42	Žďárská et al., 2013		↑	NR	NR	NR	NR	1.4057	0.540188	0.048946	0.962418	0.431439	0.853177	0.807543	0.505446	0.451032	1.28058	0.469607	0.120548	1.25954	0.49026	0.181753	73	17	1111	13	0.00105908
HORVU7Hr1G082540	copper chaperone	AT1G66240	Copper transport protein ATX1 (Copper chaperone ATX1)				↓	NR	NR	NR	NR	0.624078	0.264238	0.0118917	0.848345	0.204134	0.137389	1.24549	0.257634	0.0514358	0.761776	0.201123	0.0294973	0.899361	0.162337	0.208407	58	4	405	4	0.000370371
HORVU7Hr1G084100	Alba DNA/RNA-binding protein	AT2G34160	Uncharacterized protein At2g34160				NR	NR	NR	NR	↓	0.885633	0.395765	0.570865	0.706299	0.382796	0.196424	0.508066	0.582799	0.134376	0.800089	0.390957	0.351547	0.559821	0.287898	0.0477926	40	6	239	3	0.000227288
HORVU7Hr1G090100	Thiamine thiazole synthase	AT5G54770	Thiamine thiazole synthase, chloroplastic, EC 2.4.2.60 (Thiazole biosynthetic enzyme)	2.4.2.60			NR	NR	↓	NR	NR	1.57536	1.05949	0.162225	0.630655	0.477841	0.214993	0.247823	0.294488	0.0159464	1.02215	0.745524	0.947784	0.735245	0.510166	0.361285	17	4	111	4	0.000134867
HORVU7Hr1G100230	Heavy metal transport/detoxification superfamily protein	AT1G66240	Copper transport protein ATX1 (Copper chaperone ATX1)				NR	NR	NR	↓	NR	0.789408	0.367853	0.243827	0.715572	0.286809	0.0650984	0.691412	0.341334	0.0839851	0.645492	0.294302	0.0317168	0.899319	0.377787	0.570641	65	4	417	4	0.000369001
HORVU7Hr1G102730	chr7H:611890652-611893766 LC_U|Protein of unknown function, DUF642|none|PF04862|IPR006946, IPR008979	N/A	N/A				NR	NR	NR	NR	↓	0.546998	0.356028	0.073718	0.756656	0.354968	0.257755	0.849964	0.475599	0.538777	0.607363	0.371577	0.113074	0.508187	0.322022	0.0492902	32	8	349	8	0.000368317
HORVU7Hr1G108210	Peroxidase superfamily protein	AT4G33420	Peroxidase 47, Atperox P47, EC 1.11.1.7 (ATP32)	1.11.1.7			NR	NR	NR	NR	↓	0.840438	0.224259	0.179707	0.80103	0.303756	0.200805	0.794512	0.405624	0.301906	0.852035	0.229014	0.215472	0.585944	0.24243	0.00930168	25	4	528	4	0.000458685
HORVU7Hr1G108230	phosphoglycerate kinase	AT1G56190	Phosphoglycerate kinase 2, chloroplastic, EC 2.7.2.3	2.7.2.3			NR	NR	NR	NR	↑	1.23264	0.197672	0.0208374	1.13714	0.154369	0.0661936	1.05809	0.248777	0.610992	1.28214	0.191358	0.00592074	1.51448	0.291816	0.00204644	26	6	688	2	0.000625728
HORVU7Hr1G119060	GDSL esterase/lipase	AT3G04290	GDSL esterase/lipase LTL1, EC 3.1.1.- (Extracellular lipase LTL1) (Lithium-tolerant lipase 1, AtLTL1, Li-tolerant lipase 1)	3.1.1.-	Zhang et al., 2012	Nishiyama et al., 2012	↑	NR	NR	NR	NR	1.82841	0.240379	3.50443e-06	1.01666	0.188504	0.846795	1.06278	0.244958	0.576328	0.908183	0.214179	0.366634	0.916474	0.22475	0.430436	65	17	3456	17	0.00273225
HORVU7Hr1G119320	11S seed storage protein	AT1G07750	At1g07750/F24B9_13 (F24B9.13 protein) (Putative globulin protein) (RmlC-like cupins superfamily protein)				NR	NR	↓	NR	NR	0.783394	0.151086	0.0208526	0.896609	0.237859	0.370763	0.621495	0.161794	0.00167767	0.84324	0.147762	0.0631795	0.803862	0.185805	0.0586469	46	12	1359	2	0.00118916
HORVU7Hr1G119590	Clathrin light chain protein	AT2G20760	Clathrin light chain 1				NR	NR	↑	NR	NR	0.93032	0.519576	0.778456	0.854034	0.601162	0.618282	2.79661	1.55381	0.00638762	0.950244	0.607176	0.861019	1.00807	0.544313	0.974087	20	5	278	5	0.000288903
HORVU7Hr1G120490	4-hydroxy-4-methyl-2-oxoglutarate aldolase	AT3G02770	Putative 4-hydroxy-4-methyl-2-oxoglutarate aldolase 1, HMG aldolase 1, EC 4.1.3.17 (Oxaloacetate decarboxylase, OAA decarboxylase, EC 4.1.1.112) (Regulator of ribonuclease activity homolog 1) (RraA-like protein 1)	4.1.3.17			NR	NR	NR	↓	NR	0.940509	0.246369	0.60812	0.802614	0.187238	0.0582667	0.985304	0.239532	0.89417	0.675546	0.118554	0.00108804	0.827395	0.182198	0.0821691	26	7	599	7	0.000537414
HORVU7Hr1G121700	catalase 2	AT4G35090	Catalase-2, EC 1.11.1.6	1.11.1.6	Černý et al., 2014	Argyros et al. 2008	↑	NR	NR	NR	NR	1.34716	0.248386	0.00393814	1.05576	0.209608	0.553521	1.04068	0.266168	0.736251	0.992433	0.209167	0.937361	0.955571	0.171792	0.587744	42	15	1737	14	0.00153488

## Sheet: Table S2
														tZ-3	drought-2	drought-2	drought-1	drought-1	AX1-3	AX1-3	AX1-2	AX1-2	AX1-1	AX1-1	Cold-3	Cold-3	Cold-2	Cold-2	Cold-1	Cold-1	Heat-3	Heat-3	Heat-2	Heat-2	Heat-1	Heat-1	tZ-3	tZ-2	tZ-2	tZ-1	tZ-1	NaCl-3	NaCl-3	NaCl-2	NaCl-2	NaCl-1	NaCl-1	mock-3	mock-3
Checked	Protein FDR Confidence: Combined	Master	Accession	Description	Exp. q-value: Combined	Coverage [%]	# Peptides	# PSMs	# Unique Peptides	# Protein Groups	# AAs	MW [kDa]	calc. pI	Score Sequest HT: A Sequest HT	Score Sequest HT: AA Sequest HT	Score Sequest HT: AB Sequest HT	Score Sequest HT: AC Sequest HT	Score Sequest HT: AD Sequest HT	Score Sequest HT: AE Sequest HT	Score Sequest HT: AF Sequest HT	Score Sequest HT: AG Sequest HT	Score Sequest HT: AH Sequest HT	Score Sequest HT: AI Sequest HT	Score Sequest HT: AJ Sequest HT	Score Sequest HT: AK Sequest HT	Score Sequest HT: AL Sequest HT	Score Sequest HT: AM Sequest HT	Score Sequest HT: AN Sequest HT	Score Sequest HT: AO Sequest HT	Score Sequest HT: AP Sequest HT	Score Sequest HT: AQ Sequest HT	Score Sequest HT: AR Sequest HT	Score Sequest HT: AS Sequest HT	Score Sequest HT: AT Sequest HT	Score Sequest HT: AU Sequest HT	Score Sequest HT: AV Sequest HT	Score Sequest HT: B Sequest HT	Score Sequest HT: C Sequest HT	Score Sequest HT: D Sequest HT	Score Sequest HT: E Sequest HT	Score Sequest HT: F Sequest HT	Score Sequest HT: G Sequest HT	Score Sequest HT: H Sequest HT	Score Sequest HT: I Sequest HT	Score Sequest HT: J Sequest HT	Score Sequest HT: K Sequest HT	Score Sequest HT: L Sequest HT	Score Sequest HT: M Sequest HT	Score Sequest HT: N Sequest HT
TRUE	High	Master Protein	HORVU1Hr1G083840.2 HORVU1Hr1G083840	chr1H:532709144-532712811 HC_G|ATP synthase subunit beta|GO:0000275, GO:0005524, GO:0006754, GO:0015986, GO:0015991, GO:0015992, GO:0016820, GO:0016887, GO:0033178, GO:0046034, GO:0046933|PF00006, PF00306, PF02874, PF11421|IPR000194, IPR000793, IPR003593, IPR004100, IPR005722, IPR020003, IPR020971, IPR024034, IPR027417	0	78	34	13978	6	1	554	59.3	6.24	607.29	681.8	926.87	731.54	1047.81	708.3	927.25	719.01	904.31	786.64	955.36	469.49	658.21	631.14	783.52	651.02	820.68	768.03	994.97	744.84	921.8	651.55	830.46	865.42	652.67	894.19	707.35	906	763.93	964.52	820.23	1008.71	580.49	877.64	764.65	1138.37
	Confidence	PSM Ambiguity	Sequence	Modifications	Qvality PEP	Qvality q-value	# Proteins	# PSMs	Master Protein Accessions	Theo. MH+ [Da]	DeltaM [ppm] (by Search Engine): A Sequest HT	DeltaM [ppm] (by Search Engine): AA Sequest HT	DeltaM [ppm] (by Search Engine): AB Sequest HT	DeltaM [ppm] (by Search Engine): AC Sequest HT	DeltaM [ppm] (by Search Engine): AD Sequest HT	DeltaM [ppm] (by Search Engine): AE Sequest HT	DeltaM [ppm] (by Search Engine): AF Sequest HT	DeltaM [ppm] (by Search Engine): AG Sequest HT	DeltaM [ppm] (by Search Engine): AH Sequest HT	DeltaM [ppm] (by Search Engine): AI Sequest HT	DeltaM [ppm] (by Search Engine): AJ Sequest HT	DeltaM [ppm] (by Search Engine): AK Sequest HT	DeltaM [ppm] (by Search Engine): AL Sequest HT	DeltaM [ppm] (by Search Engine): AM Sequest HT	DeltaM [ppm] (by Search Engine): AN Sequest HT	DeltaM [ppm] (by Search Engine): AO Sequest HT	DeltaM [ppm] (by Search Engine): AP Sequest HT	DeltaM [ppm] (by Search Engine): AQ Sequest HT	DeltaM [ppm] (by Search Engine): AR Sequest HT	DeltaM [ppm] (by Search Engine): AS Sequest HT	DeltaM [ppm] (by Search Engine): AT Sequest HT	DeltaM [ppm] (by Search Engine): AU Sequest HT	DeltaM [ppm] (by Search Engine): AV Sequest HT	DeltaM [ppm] (by Search Engine): B Sequest HT	DeltaM [ppm] (by Search Engine): C Sequest HT	DeltaM [ppm] (by Search Engine): D Sequest HT	DeltaM [ppm] (by Search Engine): E Sequest HT	DeltaM [ppm] (by Search Engine): F Sequest HT	DeltaM [ppm] (by Search Engine): G Sequest HT	DeltaM [ppm] (by Search Engine): H Sequest HT	DeltaM [ppm] (by Search Engine): I Sequest HT	DeltaM [ppm] (by Search Engine): J Sequest HT	DeltaM [ppm] (by Search Engine): K Sequest HT	DeltaM [ppm] (by Search Engine): L Sequest HT	DeltaM [ppm] (by Search Engine): M Sequest HT	DeltaM [ppm] (by Search Engine): N Sequest HT	DeltaM [ppm] (by Search Engine): O Sequest HT	DeltaM [ppm] (by Search Engine): P Sequest HT	DeltaM [ppm] (by Search Engine): Q Sequest HT
	High	Unambiguous	IGLFGGAGVGK		5.47366e-07	0	7	413	HORVU3Hr1G063590.2 HORVU3Hr1G063590; HORVU1Hr1G083840.2 HORVU1Hr1G083840; HORVU6Hr1G049250.6 HORVU6Hr1G049250	975.562	0.13	-1.1	-1.71	0.95	1.57	0.95	0.75	0.95	-1.92	-0.07	-0.89	-1.1	-0.48	0.54	1.16	1.77	0.13	-1.51	-1.1	-0.69	2.39	0.75	-0.69	-1.1	-0.07	0.75	-0.69	-0.28	1.57	1.57	1.77	1.77	-0.07	2.39	0.34	0.13	1.16	1.36	0.13
	High	Unambiguous	IPSAVGYQPTLATDLGGLQER		3.41086e-18	0	2	620	HORVU3Hr1G063590.2 HORVU3Hr1G063590; HORVU1Hr1G083840.2 HORVU1Hr1G083840	2186.15	1.13	0.45	-1.48	2.64	1.27	-0.93	1.41	0.86	0.17	0.17	1.54	0.03	0.17	-0.65	0.31	0.45	-0.1	1.68	1.68	1.27	0.99	0.58	1.13	1.13	0.99	0.31	0.03	2.5	-1.89	1.13	0.31	0.99	0.99	1.41	1.41	1.54	0.99	1.13	0.86
	High	Unambiguous	TVLIMELINNVAK		7.9208e-09	0	2	678	HORVU3Hr1G063590.2 HORVU3Hr1G063590; HORVU1Hr1G083840.2 HORVU1Hr1G083840	1457.84	0.49	0.08	1.86	0.49	1.04	-3.63	1.04	-0.75	-0.88	-0.61	-0.34	-0.2	-0.06	-2.26	-1.98	-2.12	-1.84	-1.3	-1.3	-2.12	-1.43	-0.88	-0.61	-1.84	0.63	-0.75	-0.88	0.49	-1.02	-1.43	-1.16	0.08	-1.16	-0.2	0.9	-3.22	-4.18	0.08	0.49
	High	Unambiguous	CALVYGQMNEPPGAR		5.0927e-11	0	2	389	HORVU3Hr1G063590.2 HORVU3Hr1G063590; HORVU1Hr1G083840.2 HORVU1Hr1G083840	1605.75	1.44	-0.18	0.07	1.82	-2.05	0.45	-0.05	1.32	-0.05	2.19	0.69	3.93	0.45	2.31	0.57	0.69	1.69	-0.55	1.07	2.06	2.44	-0.68	-0.68	1.19	-3.42	1.94	-0.55	-0.8	0.45	0.82	1.94	-2.05	0.07	0.57	-0.3	1.57	1.82	-0.8	0.32
	High	Unambiguous	ITDEFTGAGSVGQVCQVIGAVVDVR		9.72892e-18	0	2	341	HORVU3Hr1G063590.2 HORVU3Hr1G063590; HORVU1Hr1G083840.2 HORVU1Hr1G083840	2520.28	0.47	0.35	-0.84	-0.01	1.06	0.59	0.23	0.11	-0.6	-0.36	0.23	0.71	-1.55	0.71	-0.6	-1.91	-0.72	-1.55	-0.13	1.06	-2.98	3.56	0.83	-0.84	-0.6	1.18	2.14	1.78	-0.36	-0.36	0.47	0.47	-0.6	-0.96	1.78	-0.48	1.3	-0.96	-0.48
	High	Unambiguous	DAEGQDVLLFIDNIFR		2.00963e-13	0	2	612	HORVU3Hr1G063590.2 HORVU3Hr1G063590; HORVU1Hr1G083840.2 HORVU1Hr1G083840	1864.94	0.31	-0.66	-2.05	-2.59	-0.55	-0.87	0.09	-0.55	0.2	-1.2	0.31	0.31	-1.2	0.31	-0.98	-1.3	-0.02	-0.34	-2.05	-1.73	-0.02	-1.95	1.06	-4.95	-2.05	-0.34	0.41	0.52	-1.2	-2.38	1.49	-1.41	0.09	-1.84	-2.7	-0.87	-0.12	-1.52	-1.2
	High	Unambiguous	VLNTGSPITVPVGR		2.44868e-11	0	2	362	HORVU3Hr1G063590.2 HORVU3Hr1G063590; HORVU1Hr1G083840.2 HORVU1Hr1G083840	1409.81	-0.4	-0.97	-1.25	-0.26	0.88	0.31	-0.54	-1.96	0.17	-0.12	-1.11	-2.1	-1.68	0.02	1.44	-0.54	0.02	0.17	-0.69	1.3	2.29	0.59	-0.97	-0.54	-1.39	0.45	-0.26	-0.83	0.31	0.59	0.59	1.02	-1.82	-1.25	-0.69	-0.26	0.31	1.44	-0.69
	High	Unambiguous	FDEGLPPILTALEVLDNSIR		1.96543e-21	0	1	1074	HORVU1Hr1G083840.2 HORVU1Hr1G083840	2212.19	-1.82	-0.6	1.16	1.03	1.98	1.3	1.71	2.65	1.71	1.98	1.3	1.03	0.21	1.57	-0.06	-1.55	3.6	0.35	-1.55	-1.41	2.52	-1.14	0.76	0.08	0.08	0.48	0.35	0.89	-0.6	1.3	1.3	0.35	-0.33	1.03	-0.19	0.21	2.79	-2.5	0.48
	High	Unambiguous	FTQANSEVSALLGRIPSAVGYQPTLATDLGGLQER		2.22971e-15	0	2	117	HORVU3Hr1G063590.2 HORVU3Hr1G063590; HORVU1Hr1G083840.2 HORVU1Hr1G083840	3659.9	-2.24	2.24	3.66					1.7	2.57									1.7	0.06	-1.58	-0.16			0.71	-2.13	1.59	2.13	3.12			2.35	0.17			1.14	0.49		0.93	-0.93
	High	Unambiguous	FTQANSEVSALLGR		1.67374e-11	0	2	355	HORVU3Hr1G063590.2 HORVU3Hr1G063590; HORVU1Hr1G083840.2 HORVU1Hr1G083840	1492.78	-0.88	-0.47	1.4	0.87	1.53	0.6	-0.74	0.46	1.67	0.87	-0.47	0.06	-0.07	0.2	0.46	0.6	-0.21	1.53	1.4	0.33	6.63	-0.47	1.13	0.06	1.13	-1.68	1.13	-0.47	-0.21	2.87	-0.61	0.46	2.47	2.07	-0.88	1	0.33	1.94	0.06
	High	Unambiguous	EGVQSFQGVLDGKYDDLSEQAFYMVGGIDEVMAK		3.82151e-11	0	1	374	HORVU1Hr1G083840.2 HORVU1Hr1G083840	3725.73	2.84	-0.46	-2.23	1.07	-0.54	0.83	-1.67	-0.38	-0.7	-1.51	-0.54	0.99	-0.21	0.02	2.04	-0.14	-1.1	-0.06	-3.32	3.33	-3.54	0.11	1.15	0.19	1.15	0.83	-0.7	1.88	0.59	-0.1	-1.42	-1.99	0.11	-2.39	1.88	-1.42	1.07	-1.34	0.43
	High	Unambiguous	EAPAFVEQATEQQILVTGIK		2.68727e-15	0	2	402	HORVU3Hr1G063590.2 HORVU3Hr1G063590; HORVU1Hr1G083840.2 HORVU1Hr1G083840	2172.15	0.59	-0.93	0.59	1.41	2.93	0.17	0.17	-1.07	-0.93	1	0.45	0.45	-1.07	0.17	0.72	1.28	-0.1	0.17	1	-0.52	-1.62	-0.24	-0.24	0.86	-1.49	-0.1	-0.24	-0.38	0.31	0.03	1.14	1.14	-0.66	0.17	-0.93	1.69	-0.1	3.21	-1.27
	High	Unambiguous	VGLTGLTVAEHFRDAEGQDVLLFIDNIFR		1.70696e-12	0	2	90	HORVU3Hr1G063590.2 HORVU3Hr1G063590; HORVU1Hr1G083840.2 HORVU1Hr1G083840	3245.7	-0.11	0.75	1.74						3.18	-0.73		1	-0.98	1.61	-1.59									-1.72	1.37		1.74	-0.11	-0.11	1.12	2.35		0.75	0.75			2.72	-2.33	0.13
	High	Unambiguous	KGSITSVQAIYVPADDLTDPAPATTFAHLDATTVLSR		4.046e-15	0	2	574	HORVU3Hr1G063590.2 HORVU3Hr1G063590; HORVU1Hr1G083840.2 HORVU1Hr1G083840	3842.98	1.12	-0.34	-0.23	-0.96	1.43	0.49	0.7	0.6	1.33	1.12	0.18	3.51	1.12	0.7	1.53	1.33	0.39	0.49	0.29	1.53	-0.96	0.91	-0.13	1.01	-0.86	-0.13	0.7	-0.13	2.16	0.91	-1.07	0.7	-0.03	1.43	-0.86	0.08	2.26	-0.55	1.01
	High	Unambiguous	VGLTGLTVAEHFR		7.65592e-08	0	2	184	HORVU3Hr1G063590.2 HORVU3Hr1G063590; HORVU1Hr1G083840.2 HORVU1Hr1G083840	1399.77	-2.27		-6.56	-0.34	0.52	-0.98	-0.77	1.8	0.73	0.3	-3.13	-1.84	-2.27	1.16	-2.06	-1.63	0.3	0.73	-0.13	-1.2	3.3	-1.84	-1.63	-0.56	1.16	-1.41	1.59	-0.98	-2.06	1.16	-1.41	-0.34	1.59	1.37	-1.63	-1.2	-4.84	1.16	-0.98
	High	Unambiguous	TIAMDGTEGLVR		1.293e-07	0	2	396	HORVU3Hr1G063590.2 HORVU3Hr1G063590; HORVU1Hr1G083840.2 HORVU1Hr1G083840	1262.64	1.28	-0.15	0.33	1.43	-0.47	1.59	0.96	0.64	0.01	3.49	0.64	0.8	-0.47	0.64	1.28	0.8	0.33	-0.47	1.91	2.07	1.43	-0.62	0.17	1.59	-1.1	0.33	-0.47	0.96	0.01	1.75	0.8	-0.47	-0.15	0.64	0.64	1.91	-0.47	1.75	0.01
	High	Unambiguous	NLQDIIAILGMDELSEDDKLTVAR		8.94582e-13	0	2	3589	HORVU3Hr1G063590.2 HORVU3Hr1G063590; HORVU1Hr1G083840.2 HORVU1Hr1G083840	2672.38	0.08	-1.04	0.98	0.42	1.14	1.77	-1.4	0.98	1.54	0.76	0.31	0.87	1.32	0.98	0.76	-2	0.69	-0.14	0.69	-0.14	-2.6	0.31	-0.03	0.24	-1.1	0.54	0.99	0.08	-0.59	0.39	-1.26	-1.55	0.76	-0.66	1.09	-0.66	-0.25	1.74	-0.48
	High	Unambiguous	LVLEVAQHLGENVVR		4.05504e-10	0	2	406	HORVU3Hr1G063590.2 HORVU3Hr1G063590; HORVU1Hr1G083840.2 HORVU1Hr1G083840	1675.95	1.47	2.55	0.22	-1.39	0.94	0.22	-0.14	3.8	1.29	0.94	2.01	-0.32	-0.14	0.4	-0.14	0.94	1.11	1.65	2.01	2.01	2.19	0.94	1.65	0.94	3.62	0.58	1.47	1.29	-0.14	2.19	1.11	3.26	2.19	1.11	0.94	1.29	0.22	2.9	2.73
	High	Unambiguous	SISELGIYPAVDPLDSTSR		3.5501e-12	0	1	809	HORVU1Hr1G083840.2 HORVU1Hr1G083840	2020.02	-0.93	-0.6	1.3	0.39	0.26	-2.08	-1.97	-2.58	-1.67	-0.1	-0.34	-1.08	-2.42	-0.99	0.55	0.26	-0.78	-1.39	-0.63	0.2	-3.16	-3.37	-1.52	-2.71	-6.43	-1.23	0.26	-2.56	-0.6	-1.08	0.2	-1.67	-0.89	-0.78	-0.4	0.41	-2.38	-0.19	-1.39
	High	Unambiguous	MLSPHVLGMDHYNTAR		5.10229e-10	0	1	367	HORVU1Hr1G083840.2 HORVU1Hr1G083840	1841.88	3.71	1.54	4.36	3.06	3.28	3.49	3.71	2.63	0.45	2.84	2.84	1.76	1.11	2.41	1.76	2.41	2.63	1.11	2.63	3.06	2.63	3.93	1.54	2.41	-0.63	2.41	3.06	2.63	0.89	2.84	3.71	1.97	2.19	1.76	3.06	1.11	1.11	2.63	1.32
	High	Unambiguous	TVLIMELINNVAK	1xDeamidated [N]	3.00054e-06	0.000341594	2	27	HORVU3Hr1G063590.2 HORVU3Hr1G063590; HORVU1Hr1G083840.2 HORVU1Hr1G083840	1458.82	-0.62	-6.24		2.53	5.82	3.9	7.47	0.48	-1.03	-1.17					-0.07	1.02	5.69	-2.54	-4.73	-2.4	4.59	1.98		-9.39			0.07		1.85		5.27				0.61	8.7	0.48	-1.72	11.17
	High	Unambiguous	NLQDIIAILGMDELSEDDKLTVAR	1xOxidation [M11]	3.20081e-06	0.000341594	2	81	HORVU3Hr1G063590.2 HORVU3Hr1G063590; HORVU1Hr1G083840.2 HORVU1Hr1G083840	2688.38			-0.29		-2.41		0.26	-0.07	-1.74	0.49	-2.08	1.94	-0.41	0.38	-3.2	-2.19	2.27	1.71	-1.41	0.71	-1.63		-2.75	-3.64	-0.52	-0.41	3.84		1.6	0.04	-2.19	-2.19	0.6	0.82	1.49	1.27		-0.07
	High	Unambiguous	AHGGFSVFAGVGER		1.67748e-06	0.000341594	2	479	HORVU3Hr1G063590.2 HORVU3Hr1G063590; HORVU1Hr1G083840.2 HORVU1Hr1G083840	1390.69	2.39	0.02	0.66	0.88	2.17	0.88	0.88	1.74	0.23	0.02	0.23	-1.49	-1.92	1.31	0.88	1.53	1.31	0.88	0.45	1.1	3.9	1.31	0.88	-0.41	0.45	1.31	2.17	1.96	1.96	0.66	0.88	2.39	1.1	1.74	0.45	1.53	1.53	1.31	-1.28
	High	Unambiguous	EAPAFVEQATEQQILVTGIK	1xDeamidated [Q]	8.48134e-07	0.000341594	2	83	HORVU3Hr1G063590.2 HORVU3Hr1G063590; HORVU1Hr1G083840.2 HORVU1Hr1G083840	2173.14	9.4	9.77	10.23	-0.11	-2.18	0.3	-1.63	-0.66	-4.94	-1.22	10.23				11.43	11.98	0.3	12.26	0.3	12.62	10.6	0.58	-2.74	11.52	9.59	8.39	10.6	9.49	11.15	5.54	0.03	-0.39	8.48	5.35	9.13	9.49	5.72	10.6
	High	Unambiguous	VVDLLAPYQR		6.28541e-06	0.000414347	2	382	HORVU3Hr1G063590.2 HORVU3Hr1G063590; HORVU1Hr1G083840.2 HORVU1Hr1G083840	1173.66	0.25	-2.65	-0.09	0.93	0.25	1.44	-1.29	-0.78	-2.82	1.1	-2.65	-3.33	-1.8	-4.87	-2.14	-1.8	0.25	0.42	-2.48	-1.97	4	-0.78	-1.12	-4.87	0.93	-3.16	-0.09	-2.65	-1.29	1.61	-1.29	-0.09	1.95	0.59	-0.78	-0.09	-1.46	0.76	-0.61
	High	Unambiguous	EAPAFVEQATEQQILVTGIKVVDLLAPYQR		9.60029e-06	0.000414347	2	12	HORVU3Hr1G063590.2 HORVU3Hr1G063590; HORVU1Hr1G083840.2 HORVU1Hr1G083840	3326.8	-6.92	-6.64	-3.16																	-4.58	-2.67			-4.24				-5.2			-9.29
	High	Unambiguous	LVLEVAQHLGENVVR	1xDeamidated [Q/N]	5.04079e-05	0.000414347	2	13	HORVU3Hr1G063590.2 HORVU3Hr1G063590; HORVU1Hr1G083840.2 HORVU1Hr1G083840	1676.93	3.43			3.25	-1.04	-2.12				-1.04	-5.52	1.82	1.64			-1.4		-1.4	-0.15		-1.4		8.26						-4.26	-1.94	0.39	6.29			0.39			1.28
	High	Unambiguous	TIAMDGTEGLVR	1xOxidation [M4]	1.21667e-05	0.000414347	2	78	HORVU3Hr1G063590.2 HORVU3Hr1G063590; HORVU1Hr1G083840.2 HORVU1Hr1G083840	1278.64	0.86	-5.54	1.01	-1.02	-1.18	1.64	-2.11	-1.33	-1.02	-0.55	-2.74	0.86	-0.24	1.48	-0.55	1.8	1.8	0.86	-0.24	1.17	-1.33	-1.65	0.7	-5.09	1.64	1.33	-0.71	0.39	-0.71	-1.96	0.86	-2.11	-0.86	1.01	1.8	-1.8	-1.65	-1.33	-1.8
	High	Unambiguous	IPSAVGYQPTLATDLGGLQER	1xDeamidated [Q]	0.000147969	0.000414347	2	16	HORVU3Hr1G063590.2 HORVU3Hr1G063590; HORVU1Hr1G083840.2 HORVU1Hr1G083840	2187.13	12.22			2.5	5.38	7.1		0.71				8.75	9.02	3.32	9.94	0.03	-2.17	8.66			4.14		0.03	10.67					0.03	9.48		9.75			4.55	3.32		7.71
	High	Selected	VLQNYKNLQDIIAILGMDELSEDDKLTVAR		6.11899e-05	0.000414347	2	140	HORVU3Hr1G063590.2 HORVU3Hr1G063590; HORVU1Hr1G083840.2 HORVU1Hr1G083840	3417.79	0.23	0.81	0.93					-0.01	-0.94									0.23	0.93	0.81	-0.59	-2.7	-1.41	0.69	0.34	1.63	1.75	2.45	-0.12	1.63	-1.53	-0.12	-2.23	-0.59	1.51	0.46	-2.23	-1.88	-1.29
	High	Unambiguous	FTQANSEVSALLGR	1xDeamidated [Q/N]	1.33568e-05	0.000414347	2	20	HORVU3Hr1G063590.2 HORVU3Hr1G063590; HORVU1Hr1G083840.2 HORVU1Hr1G083840	1493.76				8.35	-6.24	-9.05	-9.72	8.35			-6.64	-3.16	-7.85	-7.58		2.06	-7.72	-1.69	2.06	-3.43	2.46		-1.82	8.89	4.33	-5.97	-3.7	-5.97		-2.63		-2.76		-5.17	-5.17	-4.5		-2.63	6.74
	High	Unambiguous	FTQANSEVSALLGRIPSAVGYQPTLATDLGGLQER	1xDeamidated [Q/N]	9.9699e-05	0.000414347	2	11	HORVU3Hr1G063590.2 HORVU3Hr1G063590; HORVU1Hr1G083840.2 HORVU1Hr1G083840	3660.89		4.86	7.7					7.37	3.33						3			6.55	6.55		4.42	9.33		4.86	2.67	7.48	6.46	3.11	7.15			5.48				6.96	6.06	4.2	6.5
	High	Unambiguous	GSITSVQAIYVPADDLTDPAPATTFAHLDATTVLSR		5.7666e-06	0.000414347	2	180	HORVU3Hr1G063590.2 HORVU3Hr1G063590; HORVU1Hr1G083840.2 HORVU1Hr1G083840	3714.89	-2.41	3.64	0.33	-1.12	0.82	-4.03	-0.72	-0.23	1.3	-1.44	0.9	0.25	3.4	0.58	0.49	-1.36	-0.72	3.16	-1.04	0.74	-0.56	1.71	0.01	-1.12	-1.77	-0.39	0.98	0.74	0.74	-0.47	-1.12	1.87	1.22	0.74	0.41	0.74	1.14	-0.64	-0.07
	High	Unambiguous	TREGNDLYR		0.00107321	0.00127704	2	150	HORVU3Hr1G063590.2 HORVU3Hr1G063590; HORVU1Hr1G083840.2 HORVU1Hr1G083840	1123.55	-4.22	5.15	5.15	0.88	1.14	-1.26	0.08	-0.46	-0.46	0.34	0.34	-2.86	-0.99	-1.26	1.14	-0.19	2.48	-2.06	5.42	-0.72	0.08	1.41	-0.99	3.01	-3.66	1.68	-2.59	0.61	1.41	1.68	0.34	1.41	0.08	0.61	0.61	0.08	-0.72	3.28	-2.59
	High	Unambiguous	EGNDLYR		0.00282873	0.00137649	2	45	HORVU3Hr1G063590.2 HORVU3Hr1G063590; HORVU1Hr1G083840.2 HORVU1Hr1G083840	866.4				3.29	2.37	6.52	6.52	2.37		-0.63	5.6	-0.4		-0.4		1.21		0.75		7.68		1.68	7.91		8.37		3.75	3.06	2.14		-0.17	6.75	8.14	4.91	7.45		4.45		3.98
	High	Unambiguous	KGSITSVQAIYVPADDLTDPAPATTFAHLDATTVLSR	1xDeamidated [Q8]	0.00293211	0.00137649	2	7	HORVU3Hr1G063590.2 HORVU3Hr1G063590; HORVU1Hr1G083840.2 HORVU1Hr1G083840	3843.97			6		4.65	2.67			3.82	5.07	5.38			6.52	3.61				6.32											7.05	1.95			6.63	5.28			4.65
	High	Unambiguous	CALVYGQMNEPPGAR	1xDeamidated [Q/N]	0.00491657	0.00196055	2	4	HORVU3Hr1G063590.2 HORVU3Hr1G063590; HORVU1Hr1G083840.2 HORVU1Hr1G083840	1606.74	5.32	5.04		3.58	13.26	3.8			2.3	6.53					6.91		0.31		0.68				11.76	1.18			-0.31	6.16	-2.93									8.65
	High	Selected	ASAAAAEAPAPADKLPPTSDKYVGAK		0.004952	0.00196055	1	6	HORVU1Hr1G083840.2 HORVU1Hr1G083840	2497.29	0.51	0.19	0.99	-0.13	-0.61	0.35	-0.13	-0.45	2.27	1.31	0.99	-1.09	-0.77	-0.45	3.87	1.47	0.67	2.11	1.95	0.03	1.95	-0.45	0.03	1.47	2.43	-0.77	-0.93	1.15	1.47	1.63	0.83	-0.61	1.47	-0.29	1.79	0.83	0.83	-0.29	2.11
	High	Unambiguous	VVDLLAPYQR	1xDeamidated [Q9]	0.00641241	0.0025122	2	4	HORVU3Hr1G063590.2 HORVU3Hr1G063590; HORVU1Hr1G083840.2 HORVU1Hr1G083840	1174.65				-1.13		-1.98												-0.79
	High	Unambiguous	CALVYGQMNEPPGAR	1xOxidation [M8]	0.00688969	0.00300571	2	5	HORVU3Hr1G063590.2 HORVU3Hr1G063590; HORVU1Hr1G083840.2 HORVU1Hr1G083840	1621.75		-2.22	4.32				4.56	-3.95	2.71	30.58								20.23	28.98		18.25		7.48		7.4	-0.25			3.95	4.32	2.34	1.48			1.11	0		1.36	0.25
	High	Selected	ARVGLTGLTVAEHFRDAEGQDVLLFIDNIFR		0.00898584	0.00309659	2	6	HORVU3Hr1G063590.2 HORVU3Hr1G063590; HORVU1Hr1G083840.2 HORVU1Hr1G083840	3472.83	-5.81	-2.35	-4.37																					-4.51				-0.34
	High	Selected	EMIESGVIKLDDKQSESK		0.00873147	0.00309659	2	6	HORVU3Hr1G063590.2 HORVU3Hr1G063590; HORVU1Hr1G083840.2 HORVU1Hr1G083840	2036.02	0.61									2.63	1.45							1.45	-3.08										1.06
	High	Selected	SISELGIYPAVDPLDSTSR	1xAcetyl [N-Term]	0.00958559	0.0034131	1	13	HORVU1Hr1G083840.2 HORVU1Hr1G083840	2062.03			9.13				4.87		4.09	9.23		8.16	6.61			8.94					9.13	7	8.45		8.55	7.48				5.64	8.45	10.1				9.71		7.97
	High	Unambiguous	EGNDLYREMIESGVIK		0.0156182	0.00478307	2	9	HORVU3Hr1G063590.2 HORVU3Hr1G063590; HORVU1Hr1G083840.2 HORVU1Hr1G083840	1852.91				-2.1		0.33		-5.5			-1.45			-2.75	-4.21	-1.78							0.33						-3.4				-0.81
	High	Selected	DKQSESKCALVYGQMNEPPGAR		0.0205167	0.00608222	2	21	HORVU3Hr1G063590.2 HORVU3Hr1G063590; HORVU1Hr1G083840.2 HORVU1Hr1G083840	2408.13	-4.76	-2.89			-6	-2.14	-5.51			-0.9	-2.02			-0.4					-5.13	1.6			-4.88	-4.26	-7.62	-3.76	-4.13	-6.13	-4.88	-4.01	-1.02	-5.13	-3.64		-4.26	-4.88	-3.89	-4.51
	High	Unambiguous	LQDIIAILGMDELSEDDKLTVAR		0.021574	0.00625902	2	2	HORVU3Hr1G063590.2 HORVU3Hr1G063590; HORVU1Hr1G083840.2 HORVU1Hr1G083840	2558.34			-14.68																-13.74		-16.79															-18.55		-15.5
	High	Unambiguous	VLNTGSPITVPVGR	1xDeamidated [N3]	0.0238551	0.0067842	2	4	HORVU3Hr1G063590.2 HORVU3Hr1G063590; HORVU1Hr1G083840.2 HORVU1Hr1G083840	1410.8			-3.73	-0.27		0.72					8.8				7.81	-6.22	5.26		4.12			0.44		0.01		3.98		2.42	-3.11		-2.82			6.25		1.86	4.27		0.01
	High	Unambiguous	KTHDYLPIHR		0.0281378	0.00747639	1	7	HORVU1Hr1G083840.2 HORVU1Hr1G083840	1279.69			-1.28		-19.56												3.18							5.29				-3.86										18.42
	High	Unambiguous	FDEGLPPILTALEVLDNSIR	1xDeamidated [N17]	0.0298011	0.00783594	1	5	HORVU1Hr1G083840.2 HORVU1Hr1G083840	2213.17			8.61				-5.76			0.61							-6.57		-3.18	-1.01			4.68									-3.59				4
	High	Unambiguous	FTQANSEVSALLGR	2xDeamidated [Q3; N5]	0.0322499	0.00879394	2	9	HORVU3Hr1G063590.2 HORVU3Hr1G063590; HORVU1Hr1G083840.2 HORVU1Hr1G083840	1494.74	21.05		21.58						21.45													25.46	21.85	22.79		20.24	23.05	24.12		23.86		22.52
	High	Unambiguous	NLQDIIAILGMDELSEDDKLTVAR	1xDeamidated [Q3]	0.032952	0.00905898	2	1	HORVU3Hr1G063590.2 HORVU3Hr1G063590; HORVU1Hr1G083840.2 HORVU1Hr1G083840	2673.37		9.39	8.7	8.94	6.47	9.95		6.92		7.15				5.46		6.81		8.49			9.36	7.04	10.99	7.12	9.17	5.71	8.89	8.51	5.91	3.53	5.35		6.92
TRUE	High	Master Protein	HORVU6Hr1G054520.3 HORVU6Hr1G054520	chr6H:344797286-344800082 HC_G|glyceraldehyde-3-phosphate dehydrogenase C2|GO:0016620, GO:0055114|PF00044, PF02800|IPR016040, IPR020828, IPR020829, IPR020830, IPR020831	0	76	33	17038	26	1	364	39.8	8.19	1014.83	1007.06	1407.1	757	1127.44	830.44	924.8	1026.41	1208.32	916.18	1125.13	586.57	852.77	762.09	959.05	849.39	980.57	1006.22	1232.19	867.5	1047.7	817.33	1005.3	1186.38	957.81	1059.22	1034.54	1182.52	1111.43	1426.94	1029.52	1288.07	807.69	1099.38	875.03	1253.99
	Confidence	PSM Ambiguity	Sequence	Modifications	Qvality PEP	Qvality q-value	# Proteins	# PSMs	Master Protein Accessions	Theo. MH+ [Da]	DeltaM [ppm] (by Search Engine): A Sequest HT	DeltaM [ppm] (by Search Engine): AA Sequest HT	DeltaM [ppm] (by Search Engine): AB Sequest HT	DeltaM [ppm] (by Search Engine): AC Sequest HT	DeltaM [ppm] (by Search Engine): AD Sequest HT	DeltaM [ppm] (by Search Engine): AE Sequest HT	DeltaM [ppm] (by Search Engine): AF Sequest HT	DeltaM [ppm] (by Search Engine): AG Sequest HT	DeltaM [ppm] (by Search Engine): AH Sequest HT	DeltaM [ppm] (by Search Engine): AI Sequest HT	DeltaM [ppm] (by Search Engine): AJ Sequest HT	DeltaM [ppm] (by Search Engine): AK Sequest HT	DeltaM [ppm] (by Search Engine): AL Sequest HT	DeltaM [ppm] (by Search Engine): AM Sequest HT	DeltaM [ppm] (by Search Engine): AN Sequest HT	DeltaM [ppm] (by Search Engine): AO Sequest HT	DeltaM [ppm] (by Search Engine): AP Sequest HT	DeltaM [ppm] (by Search Engine): AQ Sequest HT	DeltaM [ppm] (by Search Engine): AR Sequest HT	DeltaM [ppm] (by Search Engine): AS Sequest HT	DeltaM [ppm] (by Search Engine): AT Sequest HT	DeltaM [ppm] (by Search Engine): AU Sequest HT	DeltaM [ppm] (by Search Engine): AV Sequest HT	DeltaM [ppm] (by Search Engine): B Sequest HT	DeltaM [ppm] (by Search Engine): C Sequest HT	DeltaM [ppm] (by Search Engine): D Sequest HT	DeltaM [ppm] (by Search Engine): E Sequest HT	DeltaM [ppm] (by Search Engine): F Sequest HT	DeltaM [ppm] (by Search Engine): G Sequest HT	DeltaM [ppm] (by Search Engine): H Sequest HT	DeltaM [ppm] (by Search Engine): I Sequest HT	DeltaM [ppm] (by Search Engine): J Sequest HT	DeltaM [ppm] (by Search Engine): K Sequest HT	DeltaM [ppm] (by Search Engine): L Sequest HT	DeltaM [ppm] (by Search Engine): M Sequest HT	DeltaM [ppm] (by Search Engine): N Sequest HT	DeltaM [ppm] (by Search Engine): O Sequest HT	DeltaM [ppm] (by Search Engine): P Sequest HT	DeltaM [ppm] (by Search Engine): Q Sequest HT
	High	Unambiguous	VALQCPDVELVAVNDPFITTDYMTYMFK		1.16583e-24	0	1	871	HORVU6Hr1G054520.3 HORVU6Hr1G054520	3223.54	-0.51	-2.66	-0.51	1.44	0.51	1.44	-0.05	0.14	1.16	0.6	0.6	0.23	-0.79	-0.33	0.6	0.32	1.07	-0.33	-2.1	-0.51	-1.82	0.79	-1.07	-0.05	-1.26	0.69	-0.89	-0.24	1.53	0.42	0.04	0.97	-0.7	-0.79	-0.33	1.44	-0.24	-0.33	-0.42
	High	Unambiguous	VALQCPDVELVAVNDPFITTDYMTYMFK	1xDeamidated [Q/N]	5.90118e-09	0	1	11	HORVU6Hr1G054520.3 HORVU6Hr1G054520	3224.52				7.57	4.6		18.55	6.18	8.5	17.53	17.9		5.25	-1.54				13.62	2.27		7.67		20.69	17.16		6.09	4.32	7.3		10.46				7.39		7.2		9.99
	High	Unambiguous	VALQCPDVELVAVNDPFITTDYMTYMFK	1xOxidation [M]	7.8226e-08	0	1	72	HORVU6Hr1G054520.3 HORVU6Hr1G054520	3239.53	10.66	7.32		12.97	8.62	1.3	2.97	-1.94	-0.46	4.92	-0.73	8.77	6.77		7.6	4.08	6.03		3.34		9.27	9.27	6.68			4.64		1.49	6.86	3.99	18.9	6.03	4.73	8.71		5.93	5.84	3.34	13.44
	High	Unambiguous	VALQCPDVELVAVNDPFITTDYMTYMFKYDTVHGQWK		1.29255e-11	0	1	107	HORVU6Hr1G054520.3 HORVU6Hr1G054520	4338.06	-0.7	0.5	8.94											2.25								3.54		6.29	3.82	12.29	4.56	9.52	-0.7	9.86	1.88	9.86	-4.11				7.23		1.88
	High	Unambiguous	TVDGPSSKDWR		3.85039e-07	0	2	524	HORVU7Hr1G074690.1 HORVU7Hr1G074690; HORVU6Hr1G054520.3 HORVU6Hr1G054520	1247.6	-1.88	1.25	1.97	-2.36	-1.64	-0.44	-0.68	0.05	0.29	-0.92	-2.84	1.49	-0.44	-0.2	0.05	-2.36	-1.64	-0.92	-0.44	-1.4	-0.44	0.53	-1.16	-0.2	1.25	-0.92	-0.2	-0.92	-1.88	-2.12	-0.68	-3.32	2.21	-1.88	0.77	-2.12	-4.76	0.05	0.29
	High	Unambiguous	LTGMAFRVPTVDVSVVDLTVR	1xOxidation [M4]	1.86469e-07	0	1	80	HORVU6Hr1G054520.3 HORVU6Hr1G054520	2291.24	4.7	9.22	-3.03	-3.55	-0.41	-3.81	0.64	-0.54	-3.55		-4.86	-1.19	-1.32	-1.59	-2.76			-4.07	-4.6	-6.04	-1.49	-4.99	-1.59	-1.84		0.26	-2.63		-1.19	-0.54	-3.29	0.64	-12.19	-0.93	-1.98	-0.93	-0.28	-0.54	-7.48
	High	Unambiguous	LTGMAFRVPTVDVSVVDLTVR		3.24867e-21	0	1	532	HORVU6Hr1G054520.3 HORVU6Hr1G054520	2275.25	0.04	1.62	1.49	-0.49	2.15	-0.75	-0.23	1.22	2.01	-0.36	0.43	0.3	-0.23	0.43	-0.36	-1.41	0.7	1.22	-0.75	1.49	-0.89	0.7	0.56	0.17	0.17	2.01	1.36	1.22	0.96	1.62	0.7	2.28	0.56	0.7	0.7	2.01	1.36	0.96	0.43
	High	Unambiguous	GILGYVDEDLVSTDFQGDSR		9.50705e-15	0	1	546	HORVU6Hr1G054520.3 HORVU6Hr1G054520	2186.02	-1.3	8.86	3.78	1.17	0.62	1.72	4.33	1.17	-0.75	-0.61	0.76	-0.06	2.55	-1.02	0.62	2.13	0.08	0.35	1.72	-0.06	-1.57	1.72	-0.06	1.45	2.55	1.17	0.76	2	0.21	0.21	0.08	0.21	-0.2	-1.16	-0.12	-1.3	-1.03	0.62	-2.5
	High	Unambiguous	VINDRFGIVEGLMTTVHAMTATQK		1.9915e-14	0	1	946	HORVU6Hr1G054520.3 HORVU6Hr1G054520	2632.36	1.68	2.59	2.29	0.61	-0.15	-0.3	2.29	0.31	0.46	2.13	1.22	3.05	0.31	1.07	-1.82	-1.21	0.61	0.16	-0.45	-1.06	-0.75	0.92	-0.15	0.61	0.92	1.68	2.59	1.37	1.83	0.31	1.53	0.92	0.46	1.68	2.13	2.89	2.13	1.22	3.05
	High	Unambiguous	VLPELNGKLTGMAFR		3.47567e-08	0	2	69	HORVU6Hr1G032070.2 HORVU6Hr1G032070; HORVU6Hr1G054520.3 HORVU6Hr1G054520	1645.91	-0.35	-0.35	0.74						-1.81					-34.8				-0.71	-1.44	0.93				1.11		-0.35	0.93	-1.08	-3.63	-1.81	-1.63		-29.51	-33.16	-0.17		-2.72	-2.17	-0.9
	High	Unambiguous	VLPELNGKLTGMAFR	1xDeamidated [N6]	4.04122e-08	0	2	320	HORVU6Hr1G032070.2 HORVU6Hr1G032070; HORVU6Hr1G054520.3 HORVU6Hr1G054520	1646.89	0.55	0	-1.27	2.55	0.37	-1.27	-3.64	0.19	-2.73	-1.45	-1.09	-2.18	-1.45	-0.18	-2.36	-0.36	-1.82	-0.18	1.28	0	-1.09	0.19	-0.18	0.37	0.55	-0.72	-0.54	0.19	-2.18	-3.82	-0.54	-0.36	-0.18	-0.36	0.73	0.19	-1.45	0.73	0.92
	High	Unambiguous	VPTVDVSVVDLTVR		1.99901e-12	0	2	1122	HORVU7Hr1G074690.1 HORVU7Hr1G074690; HORVU6Hr1G054520.3 HORVU6Hr1G054520	1498.85	0.93	-0.67	0.68	2.66	3.28	-0.67	2.08	-0.67	-0.13	1.19	-0.13	1.06	0.48	1.08	0.68	2.66	1.08	0.48	1.48	1.06	-0.53	-0.41	1.48	-0.54	0.93	0.28	-0.54	0.28	-0.33	2.08	1.48	1.48	-0.33	2.08	0.79	1.08	-0.14	2.48	0.39
	High	Unambiguous	FGIVEGLMTTVHAMTATQK		1.80786e-12	0	1	1266	HORVU6Hr1G054520.3 HORVU6Hr1G054520	2035.04	-0.66	-0.81	1.84	0.66	1.9	-0.07	1.84	0.08	-0.07	1.11	0.92	1.99	-0.51	-0.37	-0.51	0.08	0.52	0.22	0.08	-0.81	-0.45	0.52	0.52	-0.96	0.66	-0.37	1.25	1.4	0.96	0.22	-0.07	-1.1	-0.37	1.55	0.52	1.84	0.22	-0.66	1.4
	High	Unambiguous	AASFNIIPSSTGAAK		1.00571e-07	0	2	794	HORVU7Hr1G074690.1 HORVU7Hr1G074690; HORVU6Hr1G054520.3 HORVU6Hr1G054520	1434.76	-0.28	0	-1.95	1.26	0.98	0.98	1.95	1.12	0.56	-0.69	3.07	-0.83	0.84	0.98	2.79	3.63	1.68	0.98	2.79	3.35	5.44	1.81	1.12	2.09	-0.28	2.37	-0.14	0.56	2.09	-1.39	2.65	2.37	2.23	3.07	-0.14	0.84	0.56	-0.14	0.84
	High	Unambiguous	NPEEIPWAAAGAEYVVESTGVFTDKDK		4.31095e-08	0	1	786	HORVU6Hr1G054520.3 HORVU6Hr1G054520	2923.4	-1.9	-0.88	1.89	-0.88	1.18	-0.26	1.18	-0.57	0.36	0.25	-0.57	1.79	1.59	0.36	-0.98	0.15	0.15	-0.47	0.46	0.36	-0.06	-0.88	-0.67	-0.36	-0.67	-4.47	0.36	1.59	0.56	1.18	0.25	1.07	-0.88	1.89	-1.39	2	0.66	-0.16	-1.29
	High	Unambiguous	TLLFGEKEVAVFGCR		1.53035e-09	0	1	410	HORVU6Hr1G054520.3 HORVU6Hr1G054520	1668.88	0.87	0.33	0.87	1.23	1.05	-1.1	-1.1	-0.03	-1.1	0.69	-0.74	-0.56	-1.46	0.87	-1.46	1.23	-0.03	-1.46	0.87	0.51	-2.72	0.15	-0.2	-0.56	-0.56	-1.46	0.51	-1.28	0.87	-0.56	1.23	-0.03	-0.92	-1.82	-0.74	0.87	-1.28	2.31	-1.64
	High	Unambiguous	AGIALNDNFVKLVSWYDNEWGYSTR		2.03245e-07	0	1	6	HORVU6Hr1G054520.3 HORVU6Hr1G054520	2918.41	3.89	13.66	9.55																								3.89	-0.42
	High	Unambiguous	LVSWYDNEWGYSTR		2.82143e-12	0	1	1452	HORVU6Hr1G054520.3 HORVU6Hr1G054520	1775.8	1.1	1.44	-0.03	0.08	-0.93	-0.25	1.11	0.42	2.8	0.31	1.96	-0.82	0.77	0.42	0.42	2.22	2.46	0.6	1.55	0.65	2.79	0.87	1.11	2.45	3.01	0.94	0.87	1.45	-0.25	0.94	1.44	0.94	1.21	2.12	2.11	-0.07	1.32	3.14	0.76
	High	Unambiguous	GILGYVDEDLVSTDFQGDSR	1xDeamidated [Q16]	4.02744e-06	0.000341594	1	9	HORVU6Hr1G054520.3 HORVU6Hr1G054520	2187.01			10.94	8.93	5.09	9.57	6		12.4		16.06		6.64		6.28	6.09	8.47	4.63	9.57		9.48	7.46	4.26	7.46	3.72	9.2	8.47		14.14	8.38		7.01	7.83	8.01	4.63	7.01	9.38	7.92	8.1
	High	Unambiguous	VINDRFGIVEGLMTTVHAMTATQK	1xDeamidated [N/Q]	5.14085e-06	0.000341594	1	160	HORVU6Hr1G054520.3 HORVU6Hr1G054520	2633.34	-0.3	-1.52	1.67	0.46	-2.28	2.28	0.91	0.46	0.3	-0.91	-3.19	1.82	3.49	-2.13	3.65	0.15	4.41	-1.82	2.73	-3.19	-1.52	5.17	0.3	2.43	1.82	3.19	2.58	3.19	0.3	-0.61	3.49	1.37	-3.04	3.19	1.67	-0.3	0.91	1.67	0.3
	High	Unambiguous	VLPELNGKLTGMAFR	1xDeamidated [N6]; 1xOxidation [M12]	2.41916e-06	0.000341594	2	124	HORVU6Hr1G032070.2 HORVU6Hr1G032070; HORVU6Hr1G054520.3 HORVU6Hr1G054520	1662.89	0.3	2.28	1.38	1.74	-1.33	1.02	1.56	2.1	1.38	1.02	-0.61	-1.51	-0.06		-0.43	-1.15	-0.61	2.64	-1.15	0.3	0.12	0.48	-0.24	3.18	2.1	-2.77	0.3	1.2	-0.97	-0.06	-0.24	1.38	2.1	-1.51	1.02	-0.24	-0.24	1.2	1.2
	High	Unambiguous	VIISAPSKDAPMFVCGVNEK		2.21948e-06	0.000341594	1	86	HORVU6Hr1G054520.3 HORVU6Hr1G054520	2105.08		6.79	-2.9	-1.91	-1.19	-1.48	0.37	0.66	1.51	-2.48	1.09			-1.05	-2.9	0.37	0.52	-1.62	-1.48	0.8	2.23	-1.34	0.37	-5.75	0.09	0.09			-1.91	0.09	0.09	-1.48	0.09	1.66	-0.05	-2.05	1.37	1.23	-1.91
	High	Selected	AAIKEESEGNLKGILGYVDEDLVSTDFQGDSR		2.3121e-06	0.000341594	1	551	HORVU6Hr1G054520.3 HORVU6Hr1G054520	3455.68	2.46	1.54	2.23	1.07	2.46	1.19	2.23	3.04	2.46	1.42	1.07	2.35	2	-0.08	2.11	0.61	0.49	0.61	0.03	1.77	-0.89	2.35	1.88	2.11	0.26	1.77	2.58	0.38	1.88	1.07	1.19	1.3	-0.08	0.96	0.84	1.54	2.58	0.84	0.49
	High	Unambiguous	AAIKEESEGNLK		1.29543e-06	0.000341594	1	561	HORVU6Hr1G054520.3 HORVU6Hr1G054520	1288.67	1.34	2.97	1.34	1.8	3.43	3.67	2.97	2.04	0.87	0.18	0.87	2.74	1.8	2.5	1.34	3.43	0.64	3.2	1.8	3.9	0.64	4.83	1.8	4.13	2.5	1.11	2.74	1.11	3.9	3.43	0.64	0.41	2.5	3.2	3.43	2.27	1.57	1.57	2.27
	High	Selected	NPEEIPWAAAGAEYVVESTGVFTDKDKAAAHIK		7.30815e-06	0.000414347	1	944	HORVU6Hr1G054520.3 HORVU6Hr1G054520	3514.75	0.29	3.27	3.98	0.43	1	0	1.14	3.7	2.99	0.71	2.85	0.57	2.14	1.57	0.29	0.71	1.99	2.85	0.14	0.85	0	1.57	1.99	0.57	1.28	2.99	2.28	3.84	1.57	3.13	3.13	2.14	1.85	0.71	2.28	2.42	2.99	1.28	1.85
	High	Unambiguous	YDTVHGQWK		5.18764e-05	0.000414347	1	354	HORVU6Hr1G054520.3 HORVU6Hr1G054520	1133.54	-1.93	0.45	0.72	-0.98	0.45	1.14	-0.08	-2.19	-1.66	-2.46	-0.61	0.19	-0.61	1.31	-0.34	-1.14	-0.34	-0.27	-0.08	-0.1	-1.4	-0.34	-1.4	-1.4	-0.08	0.45	-2.46	-2.19	-0.08	-0.08	-0.61	-1.14	-0.34	1.25	-0.08	0.45	-5.11	3.63	-3.25
	High	Unambiguous	MAPIKIGINGFGR	1xMet-loss [N-Term]	1.34531e-05	0.000414347	1	74	HORVU6Hr1G054520.3 HORVU6Hr1G054520	1242.73	-2.95	-4.88	-2.95		-5.85			-5.61	-4.64	-7.54				-5.85	-7.06			-7.3	-2.23	-3.68	0.19		-5.37	-3.92	-5.61	-6.57	-1.75	-1.99	-3.44	-3.92	-2.23	-2.95	-4.64			-3.44	-3.19	-4.16
	High	Unambiguous	MAPIKIGINGFGR	1xDeamidated [N9]; 1xMet-loss [N-Term]	6.02042e-06	0.000414347	1	493	HORVU6Hr1G054520.3 HORVU6Hr1G054520	1243.72	-0.79	-4.65	-2	1.62	0.41	2.34	1.38	0.65	1.38	-0.55	-4.17	1.86	-1.03	0.9	1.14	0.9	1.86	5.48	6.69	0.9	4.51	1.14	0.65	-1.52	6.2	5.24	-2.24	4.27	-1.03	-0.55	2.58	-0.31	3.79	4.27	0.65	5.96	0.9	2.34	2.34
	High	Unambiguous	LAKPATYEQIK		4.42974e-05	0.000414347	1	245	HORVU6Hr1G054520.3 HORVU6Hr1G054520	1261.72	4.03	2.36	0.22	2.84	1.89	1.18	0.22	2.13	0.7	-0.49	2.84	0.94	-0.25	1.18	0.46	0.46	0.46	-0.73	1.89	-0.49	-0.01	0.22	1.41	0.94	0.94	0.94	0.94	0.46	1.41	0.7	2.6	1.41	2.13	2.13	0.94	-1.2	1.18	0.94	2.36
	High	Unambiguous	LNDNFVKLVSWYDNEWGYSTR	1xAcetyl [N-Term]	5.53389e-05	0.000414347	1	76	HORVU6Hr1G054520.3 HORVU6Hr1G054520	2648.24		-17.8	-23.13	-24.15	-21.2	-26.75	-21.43	-23.81	-24.94	-24.03	-25.28	-24.6	-22.9	-20.63	-23.81	-18.03		-18.94	-20.18	-23.92	-13.04	-24.15	-21.77	-17.12	-6.81	-20.07	-19.05	-16.33	-21.31	-21.54	-26.75	-19.28	-15.99	-26.07	-19.05	-25.85	-9.65	-12.93	-21.09
	High	Unambiguous	AGIALNDNFVK		1.3746e-05	0.000414347	1	519	HORVU6Hr1G054520.3 HORVU6Hr1G054520	1161.63	1.27	-1.49	-0.11	0.93	1.79	0.93	1.61	0.93	-0.8	0.93	1.27	1.27	0.41	1.44	2.47	2.99	1.27	0.75	1.96	1.27	4.02	0.93	-0.11	1.27	0.93	1.61	1.1	1.61	2.65	2.82	1.61	-0.11	1.96	0.06	0.93	0.58	1.44	1.79	0.06
	High	Unambiguous	IGINGFGR	1xDeamidated [N4]	0.000437482	0.000693743	2	515	HORVU7Hr1G074690.1 HORVU7Hr1G074690; HORVU6Hr1G054520.3 HORVU6Hr1G054520	834.447	-5.64	-2.28	-3	-0.13	-1.56	-1.56	-1.8	-1.08	2.03	-2.28	-2.76	-1.56	0.35	1.07	0.83	-0.13	2.51	-0.61	0.35	1.07	2.03	1.31	4.19	-1.8	-2.04	4.19	-1.32	3.95	2.51	-0.84	-3.48	-1.8	0.59	-2.04	0.11	-1.32	-1.56	2.75	0.35
	High	Unambiguous	VALQCPDVELVAVNDPFITTDYMTYMFK	1xDeamidated [N14]; 1xOxidation [M23]	0.000360395	0.000693743	1	3	HORVU6Hr1G054520.3 HORVU6Hr1G054520	3240.52																4.91			5.28	8.43						4.63	14.07	7.59								8.89
	High	Unambiguous	GYVDEDLVSTDFQGDSR		0.000355258	0.000693743	1	29	HORVU6Hr1G054520.3 HORVU6Hr1G054520	1902.84					-1.51			-1.82	-1.09	4.59	-0.14	0.7	-0.25	2.91	0.91	3.01	0.17	3.96	3.64	2.91	10.48	3.85				2.28		-1.82		-0.67		0.49	2.28	-0.46	1.33		3.01
	High	Selected	VLPELNGKLTGMAFR	1xOxidation [M12]	0.00074418	0.000852642	2	14	HORVU6Hr1G032070.2 HORVU6Hr1G032070; HORVU6Hr1G054520.3 HORVU6Hr1G054520	1661.9							-1.5	1.93	-1.86					-5.83					1.21		-2.04						-0.24		-1.32				1.93	-2.58	-0.6			-2.94	0.13
	High	Unambiguous	IGINGFGR		0.00080533	0.0010159	2	326	HORVU7Hr1G074690.1 HORVU7Hr1G074690; HORVU6Hr1G054520.3 HORVU6Hr1G054520	833.463	-4.19	-3.47	-2.51	-2.27	-2.51	-1.55	-3.95	-0.59	-0.83	-3.95	-3.23	-1.79	-2.51	-0.83	-1.55	-2.99	-0.11	-3.23	0.13	-2.03	0.13	-3.47	0.37	-2.51	-3.71	-1.79	-2.99	-2.75	-8.03	-1.31	-6.83	-4.43	-2.03	-1.55	-0.59	-1.07	-1.55	-0.35	1.57
	High	Selected	VLPELNGKLTGMAFRVPTVDVSVVDLTVR	1xDeamidated [N6]	0.00181254	0.00137649	1	184	HORVU6Hr1G054520.3 HORVU6Hr1G054520	3126.72	-0.82	1.23	2	-2.74	-2.35	-0.69	1.1	0.08	-0.82	-0.82	0.2	-0.05	-1.46	-0.95	-1.2	-0.82	0.2	-0.44	-1.2	-0.18	-0.95	0.08	-1.84	-0.18	-0.05	-0.44	1.74	1.87	0.97	0.46	-0.05	0.46	0.97	0.72	0.08	1.23	-0.69	-1.71	-0.69
	High	Selected	VLPELNGKLTGMAFRVPTVDVSVVDLTVR		0.00135038	0.00137649	1	40	HORVU6Hr1G054520.3 HORVU6Hr1G054520	3125.74	-1.2	2	3.02					-1.33	-0.43									0.59	2.77	-1.84	-0.43			0.34	0.08	0.21	0.34	1.74			0.85	-0.05				1.23	-0.05		-1.33
	High	Unambiguous	AGIALNDNFVK	1xDeamidated [N]	0.00141998	0.00137649	1	51	HORVU6Hr1G054520.3 HORVU6Hr1G054520	1162.61	1.94			0.22	1.08	1.6	0.05	-1.67	-1.15	1.43	-0.64			4.18		1.43	2.63	2.63		1.25		0.74	0.22		0.57			3.15	0.39	0.91	-0.98	1.6	1.6	2.63			2.63	1.77
	High	Unambiguous	VALQCPDVELVAVNDPFITTDYMTYMFKYDTVHGQWK	1xDeamidated [N/Q]	0.00193351	0.00137649	1	18	HORVU6Hr1G054520.3 HORVU6Hr1G054520	4339.04	4.46																	6.4	3.08	3.91	6.49	6.4	4.74		9.44	4.55		2.25	5.75	7.41	1.7	6.58	6.03	4.09			8.33
	High	Unambiguous	LTGMAFR		0.00405025	0.00185291	3	377	HORVU7Hr1G108580.2 HORVU7Hr1G108580; HORVU6Hr1G032070.2 HORVU6Hr1G032070; HORVU6Hr1G054520.3 HORVU6Hr1G054520	795.418	-6.09	-8.61	-4.84	-7.1	-5.34	-4.84	-5.34	-5.09	-5.84	-9.61	-6.09	-5.84	-6.09	-7.85	-7.1	-7.6	-4.33	-7.6	-5.59	-5.34	-6.09	-5.59	-4.59	-7.1	-4.84	-5.34	-7.1	-5.34	-8.36	-6.85	-8.61	-5.34	-7.35	-2.07	-6.09	-2.57	-6.85	-3.58	-0.81
	High	Unambiguous	VVDLIR		0.00688969	0.00300571	1	476	HORVU6Hr1G054520.3 HORVU6Hr1G054520	714.451	-1.58	-0.18	-0.74	-4.66	-1.58	-1.86	-1.86	-0.46	-3.54	-2.14	-4.1	-1.58	-1.3	-1.86	-2.98	-6.62	-1.02	-0.18	-3.82	0.38	-0.46	-2.98	-1.86	-1.02	0.38	-3.26	-2.7	-2.98	1.5	-0.46	-4.66	-0.74	-1.86	-0.74	1.78	0.94	-1.86	-2.14	-1.3
	High	Unambiguous	LAKPATYEQIK	1xAcetyl [N-Term]	0.00806847	0.00300571	1	4	HORVU6Hr1G054520.3 HORVU6Hr1G054520	1303.73																											4.54	-2.36
	High	Unambiguous	EVAVFGCR		0.00931424	0.0032106	1	43	HORVU6Hr1G054520.3 HORVU6Hr1G054520	880.435	3.15	2.7	0.43	-2.53	-2.98	-0.26	-2.53	-1.62	-2.53	-0.71	-2.75	-2.07	1.11	-2.3	-0.26	-3.21	0.2	2.02	-0.48	-2.53	-3.66	-2.75	-0.26	3.38	1.56	-4.34	2.47	3.38	-2.98	-2.07	1.79	-3.44	-3.89	3.61	-2.3	-4.12	-0.26	-2.07	6.33
	High	Unambiguous	LTGMAFR	1xOxidation [M4]	0.012502	0.00419684	3	82	HORVU7Hr1G108580.2 HORVU7Hr1G108580; HORVU6Hr1G032070.2 HORVU6Hr1G032070; HORVU6Hr1G054520.3 HORVU6Hr1G054520	811.413	-5.87		-2.66	-5.87	-3.65	-4.64	-22.38	-6.36	-4.14	-12.03	-9.07	-7.59	-3.9	-6.85	-4.88	-5.38	-4.14	-6.36	-5.13		-8.09	-7.1	-5.87	-4.64	-5.38	-7.84	-8.09	-4.88	-4.88	-7.59	-8.33	-4.88	-5.62	-2.42	-4.14	-4.14	-11.78	-4.64	-0.45
	High	Unambiguous	VLPELNGK	1xDeamidated [N6]	0.0129589	0.00436389	3	459	HORVU6Hr1G032070.2 HORVU6Hr1G032070; HORVU7Hr1G074690.1 HORVU7Hr1G074690; HORVU6Hr1G054520.3 HORVU6Hr1G054520	870.493	-1.13	1.39	1.39	0.25	0.48	2.54	0.48	1.16	-0.67	1.39	0.48	3	1.62	-0.9	0.93	5.3	-1.36	-0.21	1.85	0.7	-1.36	0.7	1.39	-0.67	1.39	3.46	1.62	-2.28	1.16	-0.67	2.77	0.02	-0.67	1.39	1.85	-0.21	4.15	0.25	3.23
	High	Unambiguous	VLPELNGK		0.0137249	0.00444017	3	273	HORVU6Hr1G032070.2 HORVU6Hr1G032070; HORVU7Hr1G074690.1 HORVU7Hr1G074690; HORVU6Hr1G054520.3 HORVU6Hr1G054520	869.509	2.1	-0.2	2.33	0.03	1.41	2.79	2.56	2.33	-0.2	1.87	1.87	2.79	0.26	1.18	0.26	-0.2	-2.5	0.72	3.02	0.72	-1.12	2.1	1.41	2.1	2.79	1.41	2.56	-1.35	1.64	0.72	0.49	0.49	0.72	-0.66	2.56	2.79	2.1	1.41	-1.35
	High	Selected	AAIKEESEGNLKGILGYVDEDLVSTDFQGDSR	1xDeamidated [N/Q]	0.0147465	0.00463689	1	4	HORVU6Hr1G054520.3 HORVU6Hr1G054520	3456.67			4.54																3.04					5.47					6.39	4.54	5	5.7		5				4.42
	High	Unambiguous	SSIFDAK	1xAcetyl [N-Term]	0.0155064	0.00478307	2	5	HORVU7Hr1G074690.1 HORVU7Hr1G074690; HORVU6Hr1G054520.3 HORVU6Hr1G054520	809.404					31.58		26.15	23.43		7.86	29.11	4.15	24.91	-7.21	29.11		27.63	14.78	28.86	-9.19	28.12	30.59	29.61		11.81	-5.23	22.93	19.47	28.62	21.7	29.36		28.37		-0.05		18.49	27.63
	High	Unambiguous	IKIGINGFGR	1xAcetyl [N-Term]; 1xDeamidated [N6]	0.0153955	0.00478307	2	1	HORVU7Hr1G074690.1 HORVU7Hr1G074690; HORVU6Hr1G054520.3 HORVU6Hr1G054520	1117.64	-4.54	-2.39		-3.47				6.47					-1.86				-1.86							-1.86	21.77			-4.38				-2.66
	High	Unambiguous	IGINGFGR	1xAcetyl [N-Term]	0.0159582	0.00478307	2	8	HORVU7Hr1G074690.1 HORVU7Hr1G074690; HORVU6Hr1G054520.3 HORVU6Hr1G054520	875.473	8.16	22.55	21.41	22.33				-2.12			20.27		18.44		8.16	-1.66				10.68	17.07	-17.42	-6.46	9.3			-0.75	23.47	-0.29	0.17	-6				-14.68		8.85
	High	Unambiguous	GMAFRVPTVDVSVVDLTVR		0.0258153	0.00709161	1	5	HORVU6Hr1G054520.3 HORVU6Hr1G054520	2061.12	0.98	-7.75																									0.55	-5.28			-4.69				-1.05			-1.78	0.98
	High	Unambiguous	AFRVPTVDVSVVDLTVR		0.0374976	0.00951311	1	12	HORVU6Hr1G054520.3 HORVU6Hr1G054520	1873.05																											0.47	-0.33
TRUE	High	Master Protein	HORVU3Hr1G063590.2 HORVU3Hr1G063590	chr3H:485712463-485716048 HC_G|ATP synthase subunit beta|GO:0000275, GO:0005524, GO:0006754, GO:0015986, GO:0015991, GO:0015992, GO:0016820, GO:0016887, GO:0033178, GO:0046034, GO:0046933|PF00006, PF00306, PF02874, PF11421|IPR000194, IPR000793, IPR003593, IPR004100, IPR005722, IPR020003, IPR020971, IPR024034, IPR027417	0	68	32	12066	4	1	551	58.9	6.24	521.86	586.93	793.4	630.44	869.05	602.6	785.3	626.97	814.81	665.52	803.35	405.63	567.8	544.78	649.62	558.09	685.29	646.78	856.88	645.24	770.94	543.83	675.07	718.68	559.23	761.2	603.63	767.94	652.73	828.91	698.99	874.31	491.08	739.92	668.67	1010.15
	Confidence	PSM Ambiguity	Sequence	Modifications	Qvality PEP	Qvality q-value	# Proteins	# PSMs	Master Protein Accessions	Theo. MH+ [Da]	DeltaM [ppm] (by Search Engine): A Sequest HT	DeltaM [ppm] (by Search Engine): AA Sequest HT	DeltaM [ppm] (by Search Engine): AB Sequest HT	DeltaM [ppm] (by Search Engine): AC Sequest HT	DeltaM [ppm] (by Search Engine): AD Sequest HT	DeltaM [ppm] (by Search Engine): AE Sequest HT	DeltaM [ppm] (by Search Engine): AF Sequest HT	DeltaM [ppm] (by Search Engine): AG Sequest HT	DeltaM [ppm] (by Search Engine): AH Sequest HT	DeltaM [ppm] (by Search Engine): AI Sequest HT	DeltaM [ppm] (by Search Engine): AJ Sequest HT	DeltaM [ppm] (by Search Engine): AK Sequest HT	DeltaM [ppm] (by Search Engine): AL Sequest HT	DeltaM [ppm] (by Search Engine): AM Sequest HT	DeltaM [ppm] (by Search Engine): AN Sequest HT	DeltaM [ppm] (by Search Engine): AO Sequest HT	DeltaM [ppm] (by Search Engine): AP Sequest HT	DeltaM [ppm] (by Search Engine): AQ Sequest HT	DeltaM [ppm] (by Search Engine): AR Sequest HT	DeltaM [ppm] (by Search Engine): AS Sequest HT	DeltaM [ppm] (by Search Engine): AT Sequest HT	DeltaM [ppm] (by Search Engine): AU Sequest HT	DeltaM [ppm] (by Search Engine): AV Sequest HT	DeltaM [ppm] (by Search Engine): B Sequest HT	DeltaM [ppm] (by Search Engine): C Sequest HT	DeltaM [ppm] (by Search Engine): D Sequest HT	DeltaM [ppm] (by Search Engine): E Sequest HT	DeltaM [ppm] (by Search Engine): F Sequest HT	DeltaM [ppm] (by Search Engine): G Sequest HT	DeltaM [ppm] (by Search Engine): H Sequest HT	DeltaM [ppm] (by Search Engine): I Sequest HT	DeltaM [ppm] (by Search Engine): J Sequest HT	DeltaM [ppm] (by Search Engine): K Sequest HT	DeltaM [ppm] (by Search Engine): L Sequest HT	DeltaM [ppm] (by Search Engine): M Sequest HT	DeltaM [ppm] (by Search Engine): N Sequest HT	DeltaM [ppm] (by Search Engine): O Sequest HT	DeltaM [ppm] (by Search Engine): P Sequest HT	DeltaM [ppm] (by Search Engine): Q Sequest HT
	High	Unambiguous	IGLFGGAGVGK		5.47366e-07	0	7	413	HORVU3Hr1G063590.2 HORVU3Hr1G063590; HORVU1Hr1G083840.2 HORVU1Hr1G083840; HORVU6Hr1G049250.6 HORVU6Hr1G049250	975.562	0.13	-1.1	-1.71	0.95	1.57	0.95	0.75	0.95	-1.92	-0.07	-0.89	-1.1	-0.48	0.54	1.16	1.77	0.13	-1.51	-1.1	-0.69	2.39	0.75	-0.69	-1.1	-0.07	0.75	-0.69	-0.28	1.57	1.57	1.77	1.77	-0.07	2.39	0.34	0.13	1.16	1.36	0.13
	High	Unambiguous	IPSAVGYQPTLATDLGGLQER		3.41086e-18	0	2	620	HORVU3Hr1G063590.2 HORVU3Hr1G063590; HORVU1Hr1G083840.2 HORVU1Hr1G083840	2186.15	1.13	0.45	-1.48	2.64	1.27	-0.93	1.41	0.86	0.17	0.17	1.54	0.03	0.17	-0.65	0.31	0.45	-0.1	1.68	1.68	1.27	0.99	0.58	1.13	1.13	0.99	0.31	0.03	2.5	-1.89	1.13	0.31	0.99	0.99	1.41	1.41	1.54	0.99	1.13	0.86
	High	Unambiguous	TVLIMELINNVAK		7.9208e-09	0	2	678	HORVU3Hr1G063590.2 HORVU3Hr1G063590; HORVU1Hr1G083840.2 HORVU1Hr1G083840	1457.84	0.49	0.08	1.86	0.49	1.04	-3.63	1.04	-0.75	-0.88	-0.61	-0.34	-0.2	-0.06	-2.26	-1.98	-2.12	-1.84	-1.3	-1.3	-2.12	-1.43	-0.88	-0.61	-1.84	0.63	-0.75	-0.88	0.49	-1.02	-1.43	-1.16	0.08	-1.16	-0.2	0.9	-3.22	-4.18	0.08	0.49
	High	Unambiguous	CALVYGQMNEPPGAR		5.0927e-11	0	2	389	HORVU3Hr1G063590.2 HORVU3Hr1G063590; HORVU1Hr1G083840.2 HORVU1Hr1G083840	1605.75	1.44	-0.18	0.07	1.82	-2.05	0.45	-0.05	1.32	-0.05	2.19	0.69	3.93	0.45	2.31	0.57	0.69	1.69	-0.55	1.07	2.06	2.44	-0.68	-0.68	1.19	-3.42	1.94	-0.55	-0.8	0.45	0.82	1.94	-2.05	0.07	0.57	-0.3	1.57	1.82	-0.8	0.32
	High	Unambiguous	ITDEFTGAGSVGQVCQVIGAVVDVR		9.72892e-18	0	2	341	HORVU3Hr1G063590.2 HORVU3Hr1G063590; HORVU1Hr1G083840.2 HORVU1Hr1G083840	2520.28	0.47	0.35	-0.84	-0.01	1.06	0.59	0.23	0.11	-0.6	-0.36	0.23	0.71	-1.55	0.71	-0.6	-1.91	-0.72	-1.55	-0.13	1.06	-2.98	3.56	0.83	-0.84	-0.6	1.18	2.14	1.78	-0.36	-0.36	0.47	0.47	-0.6	-0.96	1.78	-0.48	1.3	-0.96	-0.48
	High	Unambiguous	DAEGQDVLLFIDNIFR		2.00963e-13	0	2	612	HORVU3Hr1G063590.2 HORVU3Hr1G063590; HORVU1Hr1G083840.2 HORVU1Hr1G083840	1864.94	0.31	-0.66	-2.05	-2.59	-0.55	-0.87	0.09	-0.55	0.2	-1.2	0.31	0.31	-1.2	0.31	-0.98	-1.3	-0.02	-0.34	-2.05	-1.73	-0.02	-1.95	1.06	-4.95	-2.05	-0.34	0.41	0.52	-1.2	-2.38	1.49	-1.41	0.09	-1.84	-2.7	-0.87	-0.12	-1.52	-1.2
	High	Unambiguous	VLNTGSPITVPVGR		2.44868e-11	0	2	362	HORVU3Hr1G063590.2 HORVU3Hr1G063590; HORVU1Hr1G083840.2 HORVU1Hr1G083840	1409.81	-0.4	-0.97	-1.25	-0.26	0.88	0.31	-0.54	-1.96	0.17	-0.12	-1.11	-2.1	-1.68	0.02	1.44	-0.54	0.02	0.17	-0.69	1.3	2.29	0.59	-0.97	-0.54	-1.39	0.45	-0.26	-0.83	0.31	0.59	0.59	1.02	-1.82	-1.25	-0.69	-0.26	0.31	1.44	-0.69
	High	Unambiguous	FDDGLPPILTALEVLDNSIR		7.12059e-16	0	1	623	HORVU3Hr1G063590.2 HORVU3Hr1G063590	2198.17	-0.22	-3.36	1.28	0.74	0.46	0.46	-0.76	1.56	0.33	-0.76	-1.86	-0.35	-0.63	1.42	-1.86	-2.13	-0.9	-1.31	-1.45	-2.4	-0.63	-2.95	-1.31	-3.63	-1.45	-1.58	0.74	-0.35	-2.26	-0.76	-2.54	-1.17	-1.58	-1.31	-1.04	-0.9	0.46	-3.08	-2.13
	High	Unambiguous	FTQANSEVSALLGRIPSAVGYQPTLATDLGGLQER		2.22971e-15	0	2	117	HORVU3Hr1G063590.2 HORVU3Hr1G063590; HORVU1Hr1G083840.2 HORVU1Hr1G083840	3659.9	-2.24	2.24	3.66					1.7	2.57									1.7	0.06	-1.58	-0.16			0.71	-2.13	1.59	2.13	3.12			2.35	0.17			1.14	0.49		0.93	-0.93
	High	Unambiguous	FTQANSEVSALLGR		1.67374e-11	0	2	355	HORVU3Hr1G063590.2 HORVU3Hr1G063590; HORVU1Hr1G083840.2 HORVU1Hr1G083840	1492.78	-0.88	-0.47	1.4	0.87	1.53	0.6	-0.74	0.46	1.67	0.87	-0.47	0.06	-0.07	0.2	0.46	0.6	-0.21	1.53	1.4	0.33	6.63	-0.47	1.13	0.06	1.13	-1.68	1.13	-0.47	-0.21	2.87	-0.61	0.46	2.47	2.07	-0.88	1	0.33	1.94	0.06
	High	Unambiguous	EAPAFVEQATEQQILVTGIK		2.68727e-15	0	2	402	HORVU3Hr1G063590.2 HORVU3Hr1G063590; HORVU1Hr1G083840.2 HORVU1Hr1G083840	2172.15	0.59	-0.93	0.59	1.41	2.93	0.17	0.17	-1.07	-0.93	1	0.45	0.45	-1.07	0.17	0.72	1.28	-0.1	0.17	1	-0.52	-1.62	-0.24	-0.24	0.86	-1.49	-0.1	-0.24	-0.38	0.31	0.03	1.14	1.14	-0.66	0.17	-0.93	1.69	-0.1	3.21	-1.27
	High	Unambiguous	VGLTGLTVAEHFRDAEGQDVLLFIDNIFR		1.70696e-12	0	2	90	HORVU3Hr1G063590.2 HORVU3Hr1G063590; HORVU1Hr1G083840.2 HORVU1Hr1G083840	3245.7	-0.11	0.75	1.74						3.18	-0.73		1	-0.98	1.61	-1.59									-1.72	1.37		1.74	-0.11	-0.11	1.12	2.35		0.75	0.75			2.72	-2.33	0.13
	High	Unambiguous	KGSITSVQAIYVPADDLTDPAPATTFAHLDATTVLSR		4.046e-15	0	2	574	HORVU3Hr1G063590.2 HORVU3Hr1G063590; HORVU1Hr1G083840.2 HORVU1Hr1G083840	3842.98	1.12	-0.34	-0.23	-0.96	1.43	0.49	0.7	0.6	1.33	1.12	0.18	3.51	1.12	0.7	1.53	1.33	0.39	0.49	0.29	1.53	-0.96	0.91	-0.13	1.01	-0.86	-0.13	0.7	-0.13	2.16	0.91	-1.07	0.7	-0.03	1.43	-0.86	0.08	2.26	-0.55	1.01
	High	Unambiguous	VGLTGLTVAEHFR		7.65592e-08	0	2	184	HORVU3Hr1G063590.2 HORVU3Hr1G063590; HORVU1Hr1G083840.2 HORVU1Hr1G083840	1399.77	-2.27		-6.56	-0.34	0.52	-0.98	-0.77	1.8	0.73	0.3	-3.13	-1.84	-2.27	1.16	-2.06	-1.63	0.3	0.73	-0.13	-1.2	3.3	-1.84	-1.63	-0.56	1.16	-1.41	1.59	-0.98	-2.06	1.16	-1.41	-0.34	1.59	1.37	-1.63	-1.2	-4.84	1.16	-0.98
	High	Unambiguous	TIAMDGTEGLVR		1.293e-07	0	2	396	HORVU3Hr1G063590.2 HORVU3Hr1G063590; HORVU1Hr1G083840.2 HORVU1Hr1G083840	1262.64	1.28	-0.15	0.33	1.43	-0.47	1.59	0.96	0.64	0.01	3.49	0.64	0.8	-0.47	0.64	1.28	0.8	0.33	-0.47	1.91	2.07	1.43	-0.62	0.17	1.59	-1.1	0.33	-0.47	0.96	0.01	1.75	0.8	-0.47	-0.15	0.64	0.64	1.91	-0.47	1.75	0.01
	High	Unambiguous	NLQDIIAILGMDELSEDDKLTVAR		8.94582e-13	0	2	3589	HORVU3Hr1G063590.2 HORVU3Hr1G063590; HORVU1Hr1G083840.2 HORVU1Hr1G083840	2672.38	0.08	-1.04	0.98	0.42	1.14	1.77	-1.4	0.98	1.54	0.76	0.31	0.87	1.32	0.98	0.76	-2	0.69	-0.14	0.69	-0.14	-2.6	0.31	-0.03	0.24	-1.1	0.54	0.99	0.08	-0.59	0.39	-1.26	-1.55	0.76	-0.66	1.09	-0.66	-0.25	1.74	-0.48
	High	Unambiguous	QISELGIYPAVDPLDSTSR		5.05804e-07	0	1	94	HORVU3Hr1G063590.2 HORVU3Hr1G063590	2061.05	-1.43	0.41	0.61	-0.27	2.16	-1.72	-1.72	1.48	-2.21		-0.66		0.8	1.48	-0.56		-1.63	0.22	-0.17	0.12	-0.95	-1.43	-1.92	0.8		-2.11	-2.21	-1.43	-1.63	-1.34	-2.11	-1.04	-0.75	-2.31	-1.72	-0.36	-1.82	1.77	-2.79
	High	Unambiguous	LVLEVAQHLGENVVR		4.05504e-10	0	2	406	HORVU3Hr1G063590.2 HORVU3Hr1G063590; HORVU1Hr1G083840.2 HORVU1Hr1G083840	1675.95	1.47	2.55	0.22	-1.39	0.94	0.22	-0.14	3.8	1.29	0.94	2.01	-0.32	-0.14	0.4	-0.14	0.94	1.11	1.65	2.01	2.01	2.19	0.94	1.65	0.94	3.62	0.58	1.47	1.29	-0.14	2.19	1.11	3.26	2.19	1.11	0.94	1.29	0.22	2.9	2.73
	High	Unambiguous	TVLIMELINNVAK	1xDeamidated [N]	3.00054e-06	0.000341594	2	27	HORVU3Hr1G063590.2 HORVU3Hr1G063590; HORVU1Hr1G083840.2 HORVU1Hr1G083840	1458.82	-0.62	-6.24		2.53	5.82	3.9	7.47	0.48	-1.03	-1.17					-0.07	1.02	5.69	-2.54	-4.73	-2.4	4.59	1.98		-9.39			0.07		1.85		5.27				0.61	8.7	0.48	-1.72	11.17
	High	Unambiguous	NLQDIIAILGMDELSEDDKLTVAR	1xOxidation [M11]	3.20081e-06	0.000341594	2	81	HORVU3Hr1G063590.2 HORVU3Hr1G063590; HORVU1Hr1G083840.2 HORVU1Hr1G083840	2688.38			-0.29		-2.41		0.26	-0.07	-1.74	0.49	-2.08	1.94	-0.41	0.38	-3.2	-2.19	2.27	1.71	-1.41	0.71	-1.63		-2.75	-3.64	-0.52	-0.41	3.84		1.6	0.04	-2.19	-2.19	0.6	0.82	1.49	1.27		-0.07
	High	Unambiguous	AHGGFSVFAGVGER		1.67748e-06	0.000341594	2	479	HORVU3Hr1G063590.2 HORVU3Hr1G063590; HORVU1Hr1G083840.2 HORVU1Hr1G083840	1390.69	2.39	0.02	0.66	0.88	2.17	0.88	0.88	1.74	0.23	0.02	0.23	-1.49	-1.92	1.31	0.88	1.53	1.31	0.88	0.45	1.1	3.9	1.31	0.88	-0.41	0.45	1.31	2.17	1.96	1.96	0.66	0.88	2.39	1.1	1.74	0.45	1.53	1.53	1.31	-1.28
	High	Unambiguous	EAPAFVEQATEQQILVTGIK	1xDeamidated [Q]	8.48134e-07	0.000341594	2	83	HORVU3Hr1G063590.2 HORVU3Hr1G063590; HORVU1Hr1G083840.2 HORVU1Hr1G083840	2173.14	9.4	9.77	10.23	-0.11	-2.18	0.3	-1.63	-0.66	-4.94	-1.22	10.23				11.43	11.98	0.3	12.26	0.3	12.62	10.6	0.58	-2.74	11.52	9.59	8.39	10.6	9.49	11.15	5.54	0.03	-0.39	8.48	5.35	9.13	9.49	5.72	10.6
	High	Unambiguous	VVDLLAPYQR		6.28541e-06	0.000414347	2	382	HORVU3Hr1G063590.2 HORVU3Hr1G063590; HORVU1Hr1G083840.2 HORVU1Hr1G083840	1173.66	0.25	-2.65	-0.09	0.93	0.25	1.44	-1.29	-0.78	-2.82	1.1	-2.65	-3.33	-1.8	-4.87	-2.14	-1.8	0.25	0.42	-2.48	-1.97	4	-0.78	-1.12	-4.87	0.93	-3.16	-0.09	-2.65	-1.29	1.61	-1.29	-0.09	1.95	0.59	-0.78	-0.09	-1.46	0.76	-0.61
	High	Unambiguous	EAPAFVEQATEQQILVTGIKVVDLLAPYQR		9.60029e-06	0.000414347	2	12	HORVU3Hr1G063590.2 HORVU3Hr1G063590; HORVU1Hr1G083840.2 HORVU1Hr1G083840	3326.8	-6.92	-6.64	-3.16																	-4.58	-2.67			-4.24				-5.2			-9.29
	High	Unambiguous	LVLEVAQHLGENVVR	1xDeamidated [Q/N]	5.04079e-05	0.000414347	2	13	HORVU3Hr1G063590.2 HORVU3Hr1G063590; HORVU1Hr1G083840.2 HORVU1Hr1G083840	1676.93	3.43			3.25	-1.04	-2.12				-1.04	-5.52	1.82	1.64			-1.4		-1.4	-0.15		-1.4		8.26						-4.26	-1.94	0.39	6.29			0.39			1.28
	High	Unambiguous	TIAMDGTEGLVR	1xOxidation [M4]	1.21667e-05	0.000414347	2	78	HORVU3Hr1G063590.2 HORVU3Hr1G063590; HORVU1Hr1G083840.2 HORVU1Hr1G083840	1278.64	0.86	-5.54	1.01	-1.02	-1.18	1.64	-2.11	-1.33	-1.02	-0.55	-2.74	0.86	-0.24	1.48	-0.55	1.8	1.8	0.86	-0.24	1.17	-1.33	-1.65	0.7	-5.09	1.64	1.33	-0.71	0.39	-0.71	-1.96	0.86	-2.11	-0.86	1.01	1.8	-1.8	-1.65	-1.33	-1.8
	High	Unambiguous	IPSAVGYQPTLATDLGGLQER	1xDeamidated [Q]	0.000147969	0.000414347	2	16	HORVU3Hr1G063590.2 HORVU3Hr1G063590; HORVU1Hr1G083840.2 HORVU1Hr1G083840	2187.13	12.22			2.5	5.38	7.1		0.71				8.75	9.02	3.32	9.94	0.03	-2.17	8.66			4.14		0.03	10.67					0.03	9.48		9.75			4.55	3.32		7.71
	High	Selected	VLQNYKNLQDIIAILGMDELSEDDKLTVAR		6.11899e-05	0.000414347	2	140	HORVU3Hr1G063590.2 HORVU3Hr1G063590; HORVU1Hr1G083840.2 HORVU1Hr1G083840	3417.79	0.23	0.81	0.93					-0.01	-0.94									0.23	0.93	0.81	-0.59	-2.7	-1.41	0.69	0.34	1.63	1.75	2.45	-0.12	1.63	-1.53	-0.12	-2.23	-0.59	1.51	0.46	-2.23	-1.88	-1.29
	High	Unambiguous	FTQANSEVSALLGR	1xDeamidated [Q/N]	1.33568e-05	0.000414347	2	20	HORVU3Hr1G063590.2 HORVU3Hr1G063590; HORVU1Hr1G083840.2 HORVU1Hr1G083840	1493.76				8.35	-6.24	-9.05	-9.72	8.35			-6.64	-3.16	-7.85	-7.58		2.06	-7.72	-1.69	2.06	-3.43	2.46		-1.82	8.89	4.33	-5.97	-3.7	-5.97		-2.63		-2.76		-5.17	-5.17	-4.5		-2.63	6.74
	High	Unambiguous	FTQANSEVSALLGRIPSAVGYQPTLATDLGGLQER	1xDeamidated [Q/N]	9.9699e-05	0.000414347	2	11	HORVU3Hr1G063590.2 HORVU3Hr1G063590; HORVU1Hr1G083840.2 HORVU1Hr1G083840	3660.89		4.86	7.7					7.37	3.33						3			6.55	6.55		4.42	9.33		4.86	2.67	7.48	6.46	3.11	7.15			5.48				6.96	6.06	4.2	6.5
	High	Unambiguous	GSITSVQAIYVPADDLTDPAPATTFAHLDATTVLSR		5.7666e-06	0.000414347	2	180	HORVU3Hr1G063590.2 HORVU3Hr1G063590; HORVU1Hr1G083840.2 HORVU1Hr1G083840	3714.89	-2.41	3.64	0.33	-1.12	0.82	-4.03	-0.72	-0.23	1.3	-1.44	0.9	0.25	3.4	0.58	0.49	-1.36	-0.72	3.16	-1.04	0.74	-0.56	1.71	0.01	-1.12	-1.77	-0.39	0.98	0.74	0.74	-0.47	-1.12	1.87	1.22	0.74	0.41	0.74	1.14	-0.64	-0.07
	High	Unambiguous	TREGNDLYR		0.00107321	0.00127704	2	150	HORVU3Hr1G063590.2 HORVU3Hr1G063590; HORVU1Hr1G083840.2 HORVU1Hr1G083840	1123.55	-4.22	5.15	5.15	0.88	1.14	-1.26	0.08	-0.46	-0.46	0.34	0.34	-2.86	-0.99	-1.26	1.14	-0.19	2.48	-2.06	5.42	-0.72	0.08	1.41	-0.99	3.01	-3.66	1.68	-2.59	0.61	1.41	1.68	0.34	1.41	0.08	0.61	0.61	0.08	-0.72	3.28	-2.59
	High	Unambiguous	EGNDLYR		0.00282873	0.00137649	2	45	HORVU3Hr1G063590.2 HORVU3Hr1G063590; HORVU1Hr1G083840.2 HORVU1Hr1G083840	866.4				3.29	2.37	6.52	6.52	2.37		-0.63	5.6	-0.4		-0.4		1.21		0.75		7.68		1.68	7.91		8.37		3.75	3.06	2.14		-0.17	6.75	8.14	4.91	7.45		4.45		3.98
	High	Unambiguous	MLSPHVLGQEHYNTAR		0.00308322	0.00137649	1	9	HORVU3Hr1G063590.2 HORVU3Hr1G063590	1852.91	-5.09									-3.96				1.24		-7.52	-8.49		0.81										2.1	1.45				9.81	1.89	1.24	2.32		1.67
	High	Unambiguous	KGSITSVQAIYVPADDLTDPAPATTFAHLDATTVLSR	1xDeamidated [Q8]	0.00293211	0.00137649	2	7	HORVU3Hr1G063590.2 HORVU3Hr1G063590; HORVU1Hr1G083840.2 HORVU1Hr1G083840	3843.97			6		4.65	2.67			3.82	5.07	5.38			6.52	3.61				6.32											7.05	1.95			6.63	5.28			4.65
	High	Unambiguous	CALVYGQMNEPPGAR	1xDeamidated [Q/N]	0.00491657	0.00196055	2	4	HORVU3Hr1G063590.2 HORVU3Hr1G063590; HORVU1Hr1G083840.2 HORVU1Hr1G083840	1606.74	5.32	5.04		3.58	13.26	3.8			2.3	6.53					6.91		0.31		0.68				11.76	1.18			-0.31	6.16	-2.93									8.65
	High	Unambiguous	VVDLLAPYQR	1xDeamidated [Q9]	0.00641241	0.0025122	2	4	HORVU3Hr1G063590.2 HORVU3Hr1G063590; HORVU1Hr1G083840.2 HORVU1Hr1G083840	1174.65				-1.13		-1.98												-0.79
	High	Unambiguous	CALVYGQMNEPPGAR	1xOxidation [M8]	0.00688969	0.00300571	2	5	HORVU3Hr1G063590.2 HORVU3Hr1G063590; HORVU1Hr1G083840.2 HORVU1Hr1G083840	1621.75		-2.22	4.32				4.56	-3.95	2.71	30.58								20.23	28.98		18.25		7.48		7.4	-0.25			3.95	4.32	2.34	1.48			1.11	0		1.36	0.25
	High	Selected	ARVGLTGLTVAEHFRDAEGQDVLLFIDNIFR		0.00898584	0.00309659	2	6	HORVU3Hr1G063590.2 HORVU3Hr1G063590; HORVU1Hr1G083840.2 HORVU1Hr1G083840	3472.83	-5.81	-2.35	-4.37																					-4.51				-0.34
	High	Selected	EMIESGVIKLDDKQSESK		0.00873147	0.00309659	2	6	HORVU3Hr1G063590.2 HORVU3Hr1G063590; HORVU1Hr1G083840.2 HORVU1Hr1G083840	2036.02	0.61									2.63	1.45							1.45	-3.08										1.06
	High	Rejected	QISELGIYPAVDPLDSTSR	1xDeamidated [Q1]	0.00958559	0.0034131	1	13	HORVU3Hr1G063590.2 HORVU3Hr1G063590	2062.03			9.13				4.87		4.09	9.23		8.16	6.61			8.94					9.13	7	8.45		8.55	7.48				5.64	8.45	10.1				9.71		7.97
	High	Unambiguous	EGNDLYREMIESGVIK		0.0156182	0.00478307	2	9	HORVU3Hr1G063590.2 HORVU3Hr1G063590; HORVU1Hr1G083840.2 HORVU1Hr1G083840	1852.91				-2.1		0.33		-5.5			-1.45			-2.75	-4.21	-1.78							0.33						-3.4				-0.81
	High	Unambiguous	SDKHTGSKITDEFTGAGSVGQVCQVIGAVVDVR	1xDeamidated [Q]	0.0175192	0.0052397	1	4	HORVU3Hr1G063590.2 HORVU3Hr1G063590	3361.67
	High	Selected	DKQSESKCALVYGQMNEPPGAR		0.0205167	0.00608222	2	21	HORVU3Hr1G063590.2 HORVU3Hr1G063590; HORVU1Hr1G083840.2 HORVU1Hr1G083840	2408.13	-4.76	-2.89			-6	-2.14	-5.51			-0.9	-2.02			-0.4					-5.13	1.6			-4.88	-4.26	-7.62	-3.76	-4.13	-6.13	-4.88	-4.01	-1.02	-5.13	-3.64		-4.26	-4.88	-3.89	-4.51
	High	Unambiguous	LQDIIAILGMDELSEDDKLTVAR		0.021574	0.00625902	2	2	HORVU3Hr1G063590.2 HORVU3Hr1G063590; HORVU1Hr1G083840.2 HORVU1Hr1G083840	2558.34			-14.68																-13.74		-16.79															-18.55		-15.5
	High	Unambiguous	VLNTGSPITVPVGR	1xDeamidated [N3]	0.0238551	0.0067842	2	4	HORVU3Hr1G063590.2 HORVU3Hr1G063590; HORVU1Hr1G083840.2 HORVU1Hr1G083840	1410.8			-3.73	-0.27		0.72					8.8				7.81	-6.22	5.26		4.12			0.44		0.01		3.98		2.42	-3.11		-2.82			6.25		1.86	4.27		0.01
	High	Unambiguous	FTQANSEVSALLGR	2xDeamidated [Q3; N5]	0.0322499	0.00879394	2	9	HORVU3Hr1G063590.2 HORVU3Hr1G063590; HORVU1Hr1G083840.2 HORVU1Hr1G083840	1494.74	21.05		21.58						21.45													25.46	21.85	22.79		20.24	23.05	24.12		23.86		22.52
	High	Unambiguous	NLQDIIAILGMDELSEDDKLTVAR	1xDeamidated [Q3]	0.032952	0.00905898	2	1	HORVU3Hr1G063590.2 HORVU3Hr1G063590; HORVU1Hr1G083840.2 HORVU1Hr1G083840	2673.37		9.39	8.7	8.94	6.47	9.95		6.92		7.15				5.46		6.81		8.49			9.36	7.04	10.99	7.12	9.17	5.71	8.89	8.51	5.91	3.53	5.35		6.92
TRUE	High	Master Protein	HORVU5Hr1G093700.3 HORVU5Hr1G093700	chr5H:592504014-592510252 HC_G|lipoxygenase 1|GO:0005515, GO:0016491, GO:0016702, GO:0046872, GO:0055114|PF00305, PF01477|IPR001024, IPR001246, IPR013819, IPR020833, IPR020834, IPR027433	0	67	47	7819	44	1	864	96.6	6.73	402.63	298.63	486.25	460.85	707.16	440.59	576.2	366.47	513.68	312.35	402.23	244.51	436.61	342.21	466.03	382.26	504.61	488.29	638.66	437.05	602.38	304.11	370.69	585.62	375.14	558.2	362.5	506.97	397.25	460.62	419.41	556.56	223.71	322.87	468.98	691.35
	Confidence	PSM Ambiguity	Sequence	Modifications	Qvality PEP	Qvality q-value	# Proteins	# PSMs	Master Protein Accessions	Theo. MH+ [Da]	DeltaM [ppm] (by Search Engine): A Sequest HT	DeltaM [ppm] (by Search Engine): AA Sequest HT	DeltaM [ppm] (by Search Engine): AB Sequest HT	DeltaM [ppm] (by Search Engine): AC Sequest HT	DeltaM [ppm] (by Search Engine): AD Sequest HT	DeltaM [ppm] (by Search Engine): AE Sequest HT	DeltaM [ppm] (by Search Engine): AF Sequest HT	DeltaM [ppm] (by Search Engine): AG Sequest HT	DeltaM [ppm] (by Search Engine): AH Sequest HT	DeltaM [ppm] (by Search Engine): AI Sequest HT	DeltaM [ppm] (by Search Engine): AJ Sequest HT	DeltaM [ppm] (by Search Engine): AK Sequest HT	DeltaM [ppm] (by Search Engine): AL Sequest HT	DeltaM [ppm] (by Search Engine): AM Sequest HT	DeltaM [ppm] (by Search Engine): AN Sequest HT	DeltaM [ppm] (by Search Engine): AO Sequest HT	DeltaM [ppm] (by Search Engine): AP Sequest HT	DeltaM [ppm] (by Search Engine): AQ Sequest HT	DeltaM [ppm] (by Search Engine): AR Sequest HT	DeltaM [ppm] (by Search Engine): AS Sequest HT	DeltaM [ppm] (by Search Engine): AT Sequest HT	DeltaM [ppm] (by Search Engine): AU Sequest HT	DeltaM [ppm] (by Search Engine): AV Sequest HT	DeltaM [ppm] (by Search Engine): B Sequest HT	DeltaM [ppm] (by Search Engine): C Sequest HT	DeltaM [ppm] (by Search Engine): D Sequest HT	DeltaM [ppm] (by Search Engine): E Sequest HT	DeltaM [ppm] (by Search Engine): F Sequest HT	DeltaM [ppm] (by Search Engine): G Sequest HT	DeltaM [ppm] (by Search Engine): H Sequest HT	DeltaM [ppm] (by Search Engine): I Sequest HT	DeltaM [ppm] (by Search Engine): J Sequest HT	DeltaM [ppm] (by Search Engine): K Sequest HT	DeltaM [ppm] (by Search Engine): L Sequest HT	DeltaM [ppm] (by Search Engine): M Sequest HT	DeltaM [ppm] (by Search Engine): N Sequest HT	DeltaM [ppm] (by Search Engine): O Sequest HT	DeltaM [ppm] (by Search Engine): P Sequest HT	DeltaM [ppm] (by Search Engine): Q Sequest HT
	High	Unambiguous	AWMTDEEFAREMLAGVNPMMIK		3.3761e-12	0	1	190	HORVU5Hr1G093700.3 HORVU5Hr1G093700	2570.19	2.5	0.75	2.38	2.97	0.98	1.22	3.43	2.38	-0.3	3.67	3.2	5.65	2.85	7.75	1.33	4.14	1.68	1.33	-2.28	0.28	-1.7	2.5	4.25	0.75	2.85	1.8	4.37	0.98	4.49	2.5	1.1	2.62	1.57	4.14	0.87	1.8	3.08	0.87	1.92
	High	Unambiguous	TYVDLSPGEFDSFADILK		6.48838e-12	0	2	498	HORVU5Hr1G093700.3 HORVU5Hr1G093700; HORVU5Hr1G093770.1 HORVU5Hr1G093770	2016.98	-2.25	1.32	0.62	-1.36	-0.16	-0.66	-0.01	-1.36	-0.27	-0.66	-1.79	0.23	-0.66	0.03	-1.46	0.72	-0.76	0.03	0.14	-2.15	-1.64	-0.27	-0.75	-1.79	-0.57	-2.24	-2.15	1.03	-0.47	0.29	-0.17	-0.57	-0.17	-2.09	-1.06	1.03	0.43	-1.64	-0.96
	High	Unambiguous	GKVGAEANLEQWLLPTNLPFITTGENK		2.52001e-11	0	1	352	HORVU5Hr1G093700.3 HORVU5Hr1G093700	2940.55	-4.18	-1.73	1.78	0.1	1.84	0.82	-0.94	-2.55	-2.86	-0.92	-1.9	-3.26	-2.71	-2.85	-2.3	-1.62	-0.1	-1.35	-1.62	-0.61	-2.03	0.1	-0.4	-2.58	-1.08	1.1	-1.76	-1.62	1.12	0.14	-3.37	0.14	-1.33	-1.08	0.61	-0.94	0	-1.84	-0.61
	High	Unambiguous	FAVTFDWSVDKLGVPGAIIVK		6.57213e-09	0	1	200	HORVU5Hr1G093700.3 HORVU5Hr1G093700	2262.25	-0.72		2.86	-0.85	1.01	-0.98	0.61	-0.85	0.48	-0.45	-0.72	1.27	0.08	-0.32	-1.51	0.21	1.01	-0.05	-0.58	-0.98	-1.38	1.8	0.88	-0.05	-0.58	0.61	-1.91	1.27	-0.72	0.08	-0.32	-0.19	-0.72	0.08	-0.85	1.54	0.88	-0.45	-0.58
	High	Unambiguous	HSSDEVYLGQHDTPAWTSDAK		3.58366e-07	0	1	137	HORVU5Hr1G093700.3 HORVU5Hr1G093700	2344.05	1.25	0.74	-0.12	3.47	0.22	2.27	0.57	3.98	2.44	1.76	1.93	1.42	0.05	3.81	1.59	1.08	1.93	1.76	3.47	3.3	2.44	0.74	0.91	1.25	-1.14	2.27	0.05	1.93	-0.8	1.93	3.81	-0.12	1.59	0.4	1.42	0.74	0.57	2.44	1.25
	High	Unambiguous	VGAEANLEQWLLPTNLPFITTGENK		3.65479e-08	0	1	123	HORVU5Hr1G093700.3 HORVU5Hr1G093700	2755.43	-3.4			-4.27	-1.88	-0.46	-2.53	1.28	-4.6	-2.42	-2.1	1.39	0.19	0.19	-1.44	-4.38	-3.73	-2.64	-2.2	-2.75	-6.56	-2.75	-1.01	-4.93	-2.2	-5.58	-5.14	-4.49	-0.79	-2.64	-4.49	-3.73	-3.73	-1.99	-3.29	-2.2		-2.1	-5.14
	High	Unambiguous	KNALDFNDFGATVMDGVTELLGR		1.57087e-18	0	1	984	HORVU5Hr1G093700.3 HORVU5Hr1G093700	2483.22	-0.22	-1.55	1.23	-0.58	1.95	1.35	2.19	-0.22	2.44	0.5	2.19	1.71	-0.1	1.23	0.26	-0.46	1.59	0.62	-0.34	-0.95	0.02	-0.22	-0.34	0.26	-0.22	1.59	-0.71	0.26	2.07	-0.1	-0.22	1.11	-0.46	0.5	-0.1	2.56	0.74	0.38	-0.22
	High	Unambiguous	GVTCQLISSTNVDHNNGGR		2.55165e-12	0	1	150	HORVU5Hr1G093700.3 HORVU5Hr1G093700	1971.93	-0.39	-0.54	0.22	-1.76	-1.3	1.29	-1.3	1.59	1.29	-0.54	-1.3	-1.45	0.53	2.81	0.83	-1	0.53	0.22	2.2	0.98	2.5	-0.54	1.29	1.44	-0.84	0.83	-1.15	1.13	-0.24	-1.3	0.07	-0.24	0.07	-0.39	1.29	-0.08	0.07	1.13	-1.45
	High	Unambiguous	GTIVFVANSWVYPQAK		7.50429e-11	0	1	338	HORVU5Hr1G093700.3 HORVU5Hr1G093700	1779.94	-1.63	0.16	-0.85	0.61	-0.85	0.05	0.16	-0.4	-1.18	0.95	-2.2	-0.06	-0.51	-0.06	0.73	0.05	0.39	-0.73	0.95	-0.29	0.05	-1.07	-0.17	-0.62	0.28	0.05	0.28	-1.07	-0.62	-0.73	-0.85	-0.17	0.16	-1.41	0.16	0.28	-0.51	0.61	-1.63
	High	Unambiguous	NALDFNDFGATVMDGVTELLGR		2.12043e-15	0	1	499	HORVU5Hr1G093700.3 HORVU5Hr1G093700	2355.13	-0.72	2.8	0.3	-0.26	0.17	0.05	-0.34	1.96	0.17	-0.72	0.05	0.68	0.17	0.43	-0.34	-1.48	1.07	-0.21	-3.01	-1.19	1.32	-0.46	0.43	-0.34	0.68	-0.97	-0.72	-1.1	-0.46	-1.23	0.3	-0.72	0.33	-1.48	-0.01	0.17	1.61	-2.12	-0.26
	High	Unambiguous	SLEGLTVQQALAGNR		7.65592e-08	0	1	169	HORVU5Hr1G093700.3 HORVU5Hr1G093700	1556.84	-0.35	0.42	0.23	-0.74	1.77	2.35	-0.35	-0.93	-0.35	0.61	-5.55	1.38	-3.44	0.42	-2.28	0.8	-3.82	-2.47	0.23	-0.16	4.47	0.61	-0.74	-0.93	0.03	0.23	2.35	0.42	-0.93	-0.54	0.23	1	0.61	1.19	0.42	0.42	-0.16	1.57	-0.93
	High	Unambiguous	SAVYTPQHAGVEGWIWQLAK		1.71662e-09	0	1	192	HORVU5Hr1G093700.3 HORVU5Hr1G093700	2241.15	1.09	-0.65	0.15	-0.52	0.42	-1.46	0.82	1.62	0.15	0.28	-1.46	1.76	0.68	0.42	-0.52	-1.32	-1.46	-0.92	-0.92	-0.25	-2.53	0.68	0.55	0.42	-0.92	0.82	1.22	-1.59	-0.12	-1.99	-0.92	-0.65	-4.67	-0.12	-0.39	0.02	0.42	-0.92	-0.25
	High	Unambiguous	LYIVDQHDNLMPFLIDINNLDASFVYATR		3.86356e-09	0	1	89	HORVU5Hr1G093700.3 HORVU5Hr1G093700	3410.71		2.64	0.71		2.47	9.94						0.97	-0.58		-1.4						3.29		1.77	-0.93		-1.52	-0.34	0.24	-0.96	-0.69	5.02	1.65	3.17	-4.1			5.37	-0.93	0.27
	High	Unambiguous	LYEGGIKLPNIPALEEVR		5.78633e-08	0	1	157	HORVU5Hr1G093700.3 HORVU5Hr1G093700	2011.12	5.52			0.3	-2.09	1.49	-0.3	6.26	-0.45	-0.15	0.89	0.74	-0.3	1.04	-0.45	-0.3	-0.6	1.19	0.59	0.89	-1.64	-0.15	1.04	6.71	2.83	1.49	3.28	2.38	1.34	-1.79	0.89	0.74	-1.64	0.44	-1.2	1.64	0	-2.09	6.41
	High	Unambiguous	MFGVGGIVSDLTGGLR	1xAcetyl [N-Term]	4.05363e-14	0	1	1024	HORVU5Hr1G093700.3 HORVU5Hr1G093700	1620.84	-0.67	-1.78	0.2	0.07	2.42	0.32	2.42	0.2	2.3	0.81	0.94	-0.42	-0.05	0.81	0.57	-0.3	0.94	-0.54	-2.39	-1.28	-0.17	-1.04	1.18	-0.91	-0.05	2.05	-1.53	1.55	1.43	-0.42	-0.79	2.67	-0.3	0.81	0.69	2.67	0.07	0.94	0.44
	High	Unambiguous	TITLDNVPGRGTIVFVANSWVYPQAK		1.1235e-13	0	1	95	HORVU5Hr1G093700.3 HORVU5Hr1G093700	2846.52	-0.31	-1.68	0	-5.79	-6.22			1.06	-1.47					-0.42				-0.74	-3.48	2.95	-4.42	-2.53		0.74	-2	0.85	-0.1	0		-6.53	0.11	-0.63			0.85	-1.89	-1.47		-0.42
	High	Unambiguous	TITSQFHALVGISLMEILSK		1.27697e-06	0.000341594	1	132	HORVU5Hr1G093700.3 HORVU5Hr1G093700	2188.2	-0.89	-3.64		-2.68	-0.62	0.07	-2.95	-1.3	-3.36	-1.85	-1.3	1.57	2.12	-1.85	-1.03	-2.68	-1.17	-0.48	-0.21	-0.89	-3.09	-1.44	-0.48	-1.44	-3.22	-1.03	-1.58	-3.91	0.2	-0.48	-2.95	-0.48	-3.5	-3.22	-3.77	-4.46	-1.72	-3.77	-1.03
	High	Unambiguous	QVVAMNSDPQLK		1.73878e-06	0.000341594	1	146	HORVU5Hr1G093700.3 HORVU5Hr1G093700	1329.68	0.16	-2.7	0.31	1.51	-0.59	1.21	-0.74	-2.25	0.61	-0.74	-1.34	0.76	0.46	-3.75	0.01	0.31	-1.34	-1.34	-0.44	0.46	-1.5	-0.59	-1.65	1.21	0.16	0.31	0.16	-0.44	0.46	-2.4	-0.29	-0.59	-0.44	0.01	1.81	-1.19	1.81	-0.59	1.51
	High	Unambiguous	NLRGDDQQGPYLDHDR		3.85765e-06	0.000341594	1	49	HORVU5Hr1G093700.3 HORVU5Hr1G093700	1898.87	1.79			2.42	1.58	2.42	0.94	-0.53	1.37			4.31	3.26	2.84	1.16	-0.53	0.73	1.37	1.37			1.58			0.52		1.58				3.68	0.73				1.79	-1.58
	High	Unambiguous	TGPAKFPYMLLYPNTSDHTGQAEGLTAR		4.29625e-06	0.000341594	1	162	HORVU5Hr1G093700.3 HORVU5Hr1G093700	3036.49	-1.78	-2.18	-2.44	-0.2	-1.65	-2.7	-2.31	-2.44	-1.39	1.64		3.62	1.91	2.57	1.38	-1.12	-6	-2.84	-1.25	0.98	-3.1	-1.91	0.33	0.33	0.33	-1.65	-1.52	-0.86	-0.07	1.51	-0.73	-0.73	-8.06	-3.63	2.17	-0.6	-0.46	-1.52	0.33
	High	Unambiguous	VYRYDVYNDLGDSR		1.07486e-06	0.000341594	1	92	HORVU5Hr1G093700.3 HORVU5Hr1G093700	1734.81	3.26			0.49	-1.06	1.36	2.22	3.26	0.49		1.01	-0.2	1.19	2.05	1.36	0.32	0.67	1.01	2.74	2.05	1.88	-1.06	1.01	2.4	-0.2	1.01	0.15		1.36	1.01	4.13	-0.54	2.74		2.74	1.01	1.71	1.19	0.67
	High	Unambiguous	ALVDGIIPAIR		4.20471e-06	0.000341594	2	257	HORVU5Hr1G093700.3 HORVU5Hr1G093700; HORVU5Hr1G093770.1 HORVU5Hr1G093770	1137.7	-1.14	-0.79	-1.32	-0.08	-0.61	-2.19	-2.19	1.5	-2.9	0.44	-2.19	-1.14	-3.07	-0.44	-1.14	1.67	-1.67	-1.84	0.09	0.62	-2.72	-0.96	-0.79	-2.72	-0.96	-4.3	-0.26	0.27	-2.19	-2.02	-0.08	-2.02	-3.07	-3.07	-0.61	-1.32	-1.14	0.44	-0.96
	High	Unambiguous	YDVYNDLGDSR		8.30063e-07	0.000341594	1	84	HORVU5Hr1G093700.3 HORVU5Hr1G093700	1316.58				0.14	-0.46	0.14	-0.77	-1.22	2.57	-0.46	-0.31	-3.05	1.51	-0.77	0.45	-0.62	-0.92	0.29	-0.46						0.29	-0.31			1.51	-1.53	0.14	-0.92			2.42	-0.62	2.27	-0.62
	High	Unambiguous	TITLDNVPGR		3.37211e-05	0.000414347	1	195	HORVU5Hr1G093700.3 HORVU5Hr1G093700	1085.59	-1.5	-0.21	-0.94	0.71	-2.6	-0.39	0.16	-0.39	0.16	-0.39	-0.76	-1.13	0.9	1.27	-0.02	0.71	2.37	1.27	-0.39	-0.21	0.53	-1.87	0.53	0.9	1.08	4.58	-0.94	0.9	1.45	0.16	0.71	-0.39	-0.21	0.9	0.9	-1.31	1.63	-0.39	0.9
	High	Unambiguous	GDDQQGPYLDHDR		3.83727e-05	0.000414347	1	34	HORVU5Hr1G093700.3 HORVU5Hr1G093700	1515.65				-1.8	-1.8	0.97	0.97	2.16	-2.2	-0.02	-0.81	2.55	1.37	-1.01	0.18	-1.21	-0.41	0.97	-1.01	1.76	-0.61	2.16	0.38	2.75	-0.61	-0.22			1.37	0.38	0.38	0.18	0.97		-0.81	0.18	-1.6	-2.59
	High	Unambiguous	SLEGLTVQQALAGNR	1xDeamidated [Q/N]	0.000130969	0.000414347	1	4	HORVU5Hr1G093700.3 HORVU5Hr1G093700	1557.82				-27.59	-9.36					8.61	-6.92			1.42		-9.24				-3.72				2.73
	High	Unambiguous	FPYMLLYPNTSDHTGQAEGLTAR		0.00012455	0.000414347	1	87	HORVU5Hr1G093700.3 HORVU5Hr1G093700	2582.23	0.33	0.44	1.14	1.03	-0.48	-2.58	-1.07	-0.37	-1.99	1.84	-1.65	0.56	-0.14	2.42	1.03	0.68	-0.02	-1.99	1.37	0.44	-3.16	-0.02	-0.83	1.26	0.44	-0.83	-2.34	-0.14	-0.25	-1.07	2.3	1.26		-0.83	-1.76	-0.72	0.91	1.14	-1.53
	High	Unambiguous	AWMTDEEFAR		3.57144e-05	0.000414347	1	203	HORVU5Hr1G093700.3 HORVU5Hr1G093700	1255.54	1.06	0.26	1.06	0.74	1.06	0.74	-0.22	1.06	-0.06	0.58	-0.22	-1.17	-0.06	0.26	0.74	0.58	1.37	-0.7	0.1	1.53	0.74	0.58	-0.86	-0.7	-1.33	-0.54	-0.06	-1.81	0.26	0.58	1.37	-1.65	-1.81	-0.06	1.53	-1.65	-0.86	0.74	0.42
	High	Unambiguous	GTIVFVANSWVYPQAK	1xDeamidated [N/Q]	0.000186183	0.000414347	1	28	HORVU5Hr1G093700.3 HORVU5Hr1G093700	1780.93	9.36	6.22	10.15							9.59		10.82		11.38	11.27		-4.34	9.14	9.93		9.7		9.81	11.61	5.9	7.23	8.83	9.14	9.03	6.78	11.38	-0.97		6.33	3.97		11.05
	High	Unambiguous	GVTCQLISSTNVDHNNGGR	1xDeamidated [Q/N]	6.5274e-05	0.000414347	1	16	HORVU5Hr1G093700.3 HORVU5Hr1G093700	1972.91		-0.09		9.34	4.47	9.18	7.66		7.97	8.88								0.52	18.31						7.51		8.12	8.58	9.34	9.34	2.19					8.73		4.32
	High	Unambiguous	GLLINAGGVIEMTVFPHK		3.20684e-05	0.000414347	1	38	HORVU5Hr1G093700.3 HORVU5Hr1G093700	1896.04			0.25	-0.54	-0.85	-1.64	-2.28	-2.12	-3.07		-4.81	-4.65				-2.12		-0.22	-1.96	-0.54	-4.33	-1.64		-2.44					-1.64	-2.75		-1.33			0.1	0.41	-1.01	-1.17	0.89
	High	Unambiguous	EMLAGVNPMMIK		1.10033e-05	0.000414347	1	116	HORVU5Hr1G093700.3 HORVU5Hr1G093700	1333.67	1.25	2.6	0.05	-1.75	-0.4	0.65	0.05	2.3	1.25	-1.45	1.7	-0.7	0.2	-0.25	1.4	0.05	3.95	1.55	2.3	0.5	0.65	-1.45	1.7	0.65	2.15	0.95	2.75	-8.8	0.95	2.45	1.7	2.15	-0.1	-0.25	0.5	0.05	0.2	0.5	1.1
	High	Unambiguous	EMLAGVNPMMIKR		8.95208e-05	0.000414347	1	27	HORVU5Hr1G093700.3 HORVU5Hr1G093700	1489.77	0.99	2.2		2.6	1.39	0.59	1.39	-0.42	0.39			3.41	-5.05	2.79	9.77	-2.64		2.8	1.8		3.61	0.39	0.99	-1.43				-0.82						-6.88	0.59				3.81
	High	Unambiguous	AYASVNDYGWHQLISHWLNTHAVMEPFVIATNR		0.000219609	0.00060347	1	48	HORVU5Hr1G093700.3 HORVU5Hr1G093700	3840.87	3	2.22	3	2.48		7.3			8.08			3	5.22	1.05	1.05			1.05		2.87	3	2.87	3	-1.42		4.44	7.56	1.7		2.87		1.83	2.35	6.13			2.22	1.44	1.83
	High	Unambiguous	HWNFTEQALPADLIK		0.000221191	0.00060347	1	8	HORVU5Hr1G093700.3 HORVU5Hr1G093700	1782.92		9.59			30.29	20.53		9.26	9.59			13.63	7.91	32.98			21.54	13.29	16.32	7.07	7.91	15.99		7.57			17					27.76				20.87	22.21		9.59
	High	Unambiguous	NALDFNDFGATVMDGVTELLGR	1xDeamidated [N]	0.000401371	0.000693743	1	4	HORVU5Hr1G093700.3 HORVU5Hr1G093700	2356.11							13.15					15.95			9.49						9.92		16.03		8.14				5.84			15.61
	High	Unambiguous	YDVYNDLGDSRDVLGGSK		0.000534883	0.000693743	1	109	HORVU5Hr1G093700.3 HORVU5Hr1G093700	1972.92				3.23	2.47	2.93	1.1	5.05	5.05	4.29	5.05	-0.27	1.41	2.32	4.9	3.84	3.23	6.27	5.51	4.75	8.86	5.66	4.45	9.77	8.55	2.93		9.62	3.69	2.32	4.45	4.75	4.45	1.86	4.45	2.01	4.14	4.29	3.69
	High	Unambiguous	MFGVGGIVSDLTGGLRGAHLK	1xAcetyl [N-Term]	0.000566502	0.000693743	1	14	HORVU5Hr1G093700.3 HORVU5Hr1G093700	2127.14	0.15	-1.82	1.71																					-2.1			-0.69	-2.38				17.77
	High	Unambiguous	TITLDNVPGRGTIVFVANSWVYPQAK	1xDeamidated [N/Q]	0.00100607	0.00115556	1	3	HORVU5Hr1G093700.3 HORVU5Hr1G093700	2847.5	-6.53				5.05			-2.32	-4.11				-5.48					-4.74																		-32.86
	High	Unambiguous	HWNFTEQALPADLIKR		0.00124784	0.00127704	1	28	HORVU5Hr1G093700.3 HORVU5Hr1G093700	1939.02				-0.77	1.3	-0.56				-1.59	-1.18	1.3	0.06	0.27	-1.18		1.3	1.09		1.5	0.88	-0.35		2.12							-0.35	-0.77	-0.97	0.06		-0.56	0.47
	High	Unambiguous	FAVTFDWSVDK		0.00179957	0.00137649	1	5	HORVU5Hr1G093700.3 HORVU5Hr1G093700	1314.64						0.95	-1.64																											2.77
	High	Unambiguous	QSDFLGYTLK		0.00179957	0.00137649	1	17	HORVU5Hr1G093700.3 HORVU5Hr1G093700	1171.6				-0.89		2.52	-2.08			6.96						3.04									1.33	7.58								7.65	-1.4	0.99			-1.23
	High	Unambiguous	QLSVTHPVYK		0.00321893	0.00137649	1	10	HORVU5Hr1G093700.3 HORVU5Hr1G093700	1171.65	-8.48		-6.43		-6.69							-9.51												-7.2				-7.46				-7.97				-6.18
	High	Selected	RPMPVQGSEEYAELERDPEKAFIR		0.00238102	0.00137649	1	95	HORVU5Hr1G093700.3 HORVU5Hr1G093700	2847.41	5.44	2.28	3.16	3.86	3.68	2.98	0.17	2.46	-0.71	2.28		1.58	0.52	0.52	1.23	2.81	-0.35	0.87	0.35	1.58	7.9	4.21	0.52	1.75	3.33	-0.18	1.4	0.87		3.16	1.93	4.39	6.67	2.46	-0.35	0.35	2.63	1.4	0
	High	Unambiguous	DTMNINAR		0.00238102	0.00137649	1	177	HORVU5Hr1G093700.3 HORVU5Hr1G093700	934.441	1.32	7.1	4.32	-2.96	-1.68	-0.18	0.46	-0.39	-2.53	-1.25	-0.39	-0.39	-0.61	-1.46	-3.18	-1.68	-2.53	0.04	0.46	0.89	-0.18	-0.39	-2.53	-0.82	-1.04	-1.46	3.03	0.25	1.53	-3.18	-0.82	-2.53	0.46	-4.03	-0.18	-1.25	-3.39	-3.18	1.75
	High	Unambiguous	DVLGGSKDLPYPR		0.00229707	0.00137649	1	5	HORVU5Hr1G093700.3 HORVU5Hr1G093700	1416.75										0.84	1.05	-4.96							2.96		-0.01			5.08					-0.22						-4.26
	High	Unambiguous	LLPLVQNVYVPR		0.00149316	0.00137649	1	16	HORVU5Hr1G093700.3 HORVU5Hr1G093700	1410.85				2.39	2.54		14.96						5.65		0.69	1.68	0.83	-0.3	1.54	-0.44		-1.29	1.83			-0.58					0.41	-1.15	1.83		2.54		0.98
	High	Unambiguous	VGAEANLEQWLLPTNLPFITTGENK	1xDeamidated [N/Q]	0.0084843	0.00300571	1	16	HORVU5Hr1G093700.3 HORVU5Hr1G093700	2756.41			4.57			8.34			-7	-6.56	-3.52	6.93		-4.93	3.45	-3.84	-28.22	-0.79	-6.56	-2.75			-5.15		-1.56		-21.47	-1.23	2.14	-6.02		-9.5					1.38	8.86	6.61
	High	Unambiguous	LYIVDQHDNLMPFLIDINNLDASFVYATR	3xDeamidated [N18; N19; N/Q]	0.0084843	0.00300571	1	2	HORVU5Hr1G093700.3 HORVU5Hr1G093700	3413.66											16.25	6.23		6.84	8.78			8.6						8.25					9.57	1.39						-0.54	7.02
	High	Unambiguous	LLPLVQNVYVPRDELFGHLK		0.00854543	0.00300571	1	18	HORVU5Hr1G093700.3 HORVU5Hr1G093700	2350.33	-1.19	-2.55	-3.91	-0.17	-2.04	-1.7	1.36	0.68		0.34	-7.14	-0.68	-2.38	-1.19	-4.25	-0.68	-2.38	-1.87	-1.7	-1.02	-5.78		-2.72	0.17	-1.02	-0.85	-2.72	-1.7	-0.51	-2.72	-2.04	-2.04		-4.25	-2.38	-0.17	-2.89	-2.55	-1.36
	High	Unambiguous	NNHASEFFLK		0.0100075	0.00351765	2	22	HORVU5Hr1G093700.3 HORVU5Hr1G093700; HORVU5Hr1G093770.1 HORVU5Hr1G093770	1206.59	-5.84	-6.59	-4.35		-4.35	-4.85	-4.35	-2.36	-4.1	-6.09	-7.58	-6.59		-6.34		-7.34	-3.36	-4.6	-4.1	-2.36	-4.1	-5.59	-2.36	-4.35	0.93		-5.84	-4.85		-3.36	-4.85	-4.6				-2.86	-4.85	-0.62
	High	Unambiguous	TLLFLR		0.0122356	0.00419684	1	148	HORVU5Hr1G093700.3 HORVU5Hr1G093700	762.487	-8.02	-6.71	-6.18	-8.02	-4.87	-6.97	-5.39	-5.92	-6.71	-8.28	-4.87	-9.33	-8.8	-9.07	-6.97	-7.23	-3.3	-6.44	-8.54	-8.54	-2.51	-8.28	-5.66	-6.71	-5.66	-7.23	-4.87	-7.75	-9.07	-6.18	-8.02	-7.23	-7.23	-5.66	-6.71	-4.61	-7.23	-1.98	-6.44
	High	Unambiguous	GSVVLMR		0.0283406	0.00747639	1	204	HORVU5Hr1G093700.3 HORVU5Hr1G093700	761.434	-4.86	-5.38	-5.12	-3.28	-3.28	-8.8	-5.64	-5.12	-5.64	-6.17	-5.91	-6.96	-8.01	-5.64	-8.01	-4.86	-5.64	-6.96	-4.33	-8.53	-6.43	-6.17	-4.86	-4.59	-4.59	-6.43	-5.64	-6.96	-6.43	-5.91	-6.17	-7.22	-5.38	-4.33	-5.64	-2.75	-7.74	-2.23	-5.91
	High	Unambiguous	STLDPSKYGDHTSTMTEEHVAK		0.0320192	0.00861145	1	3	HORVU5Hr1G093700.3 HORVU5Hr1G093700	2434.12	0.94					4.55								-2.35		0.11									3.4		4.22												0.94
TRUE	High	Master Protein	HORVU3Hr1G088540.1 HORVU3Hr1G088540	chr3H:625238590-625240962 HC_G|fructose-bisphosphate aldolase 2|GO:0003824, GO:0004332, GO:0006096|PF00274|IPR000741, IPR013785, IPR029768	0	81	36	11509	10	1	387	42	8.05	475.27	613.18	953.85	601.62	868.09	631.67	773	596.95	805.44	819.56	979.05	483.51	649.4	503.99	687.57	600.52	789.9	589.42	834.38	634.54	816.65	710.42	898.33	681.71	576.29	685.44	506.43	641.36	726.51	921.49	661.48	913.45	585.77	842.34	457.88	820.49
	Confidence	PSM Ambiguity	Sequence	Modifications	Qvality PEP	Qvality q-value	# Proteins	# PSMs	Master Protein Accessions	Theo. MH+ [Da]	DeltaM [ppm] (by Search Engine): A Sequest HT	DeltaM [ppm] (by Search Engine): AA Sequest HT	DeltaM [ppm] (by Search Engine): AB Sequest HT	DeltaM [ppm] (by Search Engine): AC Sequest HT	DeltaM [ppm] (by Search Engine): AD Sequest HT	DeltaM [ppm] (by Search Engine): AE Sequest HT	DeltaM [ppm] (by Search Engine): AF Sequest HT	DeltaM [ppm] (by Search Engine): AG Sequest HT	DeltaM [ppm] (by Search Engine): AH Sequest HT	DeltaM [ppm] (by Search Engine): AI Sequest HT	DeltaM [ppm] (by Search Engine): AJ Sequest HT	DeltaM [ppm] (by Search Engine): AK Sequest HT	DeltaM [ppm] (by Search Engine): AL Sequest HT	DeltaM [ppm] (by Search Engine): AM Sequest HT	DeltaM [ppm] (by Search Engine): AN Sequest HT	DeltaM [ppm] (by Search Engine): AO Sequest HT	DeltaM [ppm] (by Search Engine): AP Sequest HT	DeltaM [ppm] (by Search Engine): AQ Sequest HT	DeltaM [ppm] (by Search Engine): AR Sequest HT	DeltaM [ppm] (by Search Engine): AS Sequest HT	DeltaM [ppm] (by Search Engine): AT Sequest HT	DeltaM [ppm] (by Search Engine): AU Sequest HT	DeltaM [ppm] (by Search Engine): AV Sequest HT	DeltaM [ppm] (by Search Engine): B Sequest HT	DeltaM [ppm] (by Search Engine): C Sequest HT	DeltaM [ppm] (by Search Engine): D Sequest HT	DeltaM [ppm] (by Search Engine): E Sequest HT	DeltaM [ppm] (by Search Engine): F Sequest HT	DeltaM [ppm] (by Search Engine): G Sequest HT	DeltaM [ppm] (by Search Engine): H Sequest HT	DeltaM [ppm] (by Search Engine): I Sequest HT	DeltaM [ppm] (by Search Engine): J Sequest HT	DeltaM [ppm] (by Search Engine): K Sequest HT	DeltaM [ppm] (by Search Engine): L Sequest HT	DeltaM [ppm] (by Search Engine): M Sequest HT	DeltaM [ppm] (by Search Engine): N Sequest HT	DeltaM [ppm] (by Search Engine): O Sequest HT	DeltaM [ppm] (by Search Engine): P Sequest HT	DeltaM [ppm] (by Search Engine): Q Sequest HT
	High	Unambiguous	IGATEPSQLSIDQNAQGLAR	1xDeamidated [Q/N]	7.80789e-09	0	2	153	HORVU3Hr1G088540.1 HORVU3Hr1G088540	2070.05	2.88	11.27	1.72	0.85	0.85	2.3	0.71	2.44	0.85	1.28	0.85		-6.99		3.89	2.59	0.56	0.71	0.71	3.31	3.46	1.57	7.12	3.6	4.47	2.59	2.3	2.73	2.44	8.18	2.44	1.14	-5.96	11.27	2.3		9.92	-0.6	2.3
	High	Unambiguous	IGATEPSQLSIDQNAQGLAR		3.15671e-21	0	2	971	HORVU3Hr1G088540.1 HORVU3Hr1G088540	2069.06	1.15	0.71	3.03	1.44	1.44	1.44	1.73	-0.01	1.29	0.13	1.29	-0.3	1.29	1	2.6	1.29	1.58	1.29	0.86	1.29	2.31	2.74	1.44	1.58	-0.45	1.15	-0.45	0.71	1.29	1.58	2.6	0.71	2.02	3.03	0.71	1.15	0.28	1.29	0.13
	High	Unambiguous	KPWNLSFSFGR		3.53257e-07	0	3	506	HORVU3Hr1G088570.1 HORVU3Hr1G088570; HORVU3Hr1G088540.1 HORVU3Hr1G088540	1338.7	2.25	3.37	0.68	3.82	1.58	-1.56	1.58	2.92	0.46	2.25	0.68	2.25	1.13	0.68	0.24	0.91	2.48	2.25	1.13	3.37	0.91	0.68	2.48	2.48	2.25	0.24	2.48	2.25	0.01	0.91	2.25	1.58	2.25	1.36	2.03	1.36	0.46	2.48	2.03
	High	Unambiguous	KVTPEVIAEYTVR		6.26179e-08	0	3	478	HORVU3Hr1G088570.1 HORVU3Hr1G088570; HORVU3Hr1G088540.1 HORVU3Hr1G088540	1504.84	0.92	-0.88	0.72	1.51	1.71	0.12	0.52	-0.48	-1.48	0.72	0.52	-0.28	-0.48	-1.08	-0.88	1.11	0.72	0.92	-1.28	1.71	1.71	1.71	-0.08	-3.07	-0.88	1.11	-1.08	-1.68	1.31	-0.88	2.11	1.91	-2.08	-1.28	0.32	1.11	-0.28	-0.48	0.92
	High	Unambiguous	AVLKIGATEPSQLSIDQNAQGLAR		3.4496e-12	0	2	3	HORVU3Hr1G088540.1 HORVU3Hr1G088540	2480.35		-1.16	-0.68																								-3.22
	High	Unambiguous	TVPAAVPAIVFLSGGQSEEEATLNLNAMNK		1.67572e-18	0	3	2044	HORVU3Hr1G088570.1 HORVU3Hr1G088570; HORVU3Hr1G088540.1 HORVU3Hr1G088540	3071.57	-3.98	-0.17	1.59	-5.06	-1.44	-0.86	-0.95	-1.34	-0.56	-1.64	-0.76	-1.05	-2.13	0.61	-3.2	-1.83	-1.15	-1.64	-1.93	-2.32	0.52	0.12	-0.95	-1.44	-1.54	-1.05	-2.52	-1.73	-2.22	-0.56	-0.95	-0.95	-0.95	-0.66	-0.37	0.22	-1.54	-1.64	-2.32
	High	Unambiguous	TVPAAVPAIVFLSGGQSEEEATLNLNAMNKLQTK		6.59461e-11	0	3	23	HORVU3Hr1G088570.1 HORVU3Hr1G088570; HORVU3Hr1G088540.1 HORVU3Hr1G088540	3541.86	0.43	1.33	2.8					0.65	2.12									0.43	-0.25	-2.17	-0.14			1.44	0.54	2.23	0.77	1.56	2.35		1.89	0.88				-1.49			-0.7
	High	Unambiguous	GILAADESTGTIGKR		1.36895e-11	0	4	669	HORVU3Hr1G088570.1 HORVU3Hr1G088570; HORVU3Hr1G088540.1 HORVU3Hr1G088540	1488.8	2.35	1.34	3.56	2.35	1.54	4.57	2.35	1.14	2.75	2.55	2.35	3.36	3.56	2.15	3.16	3.16	-1.28	2.75	2.15	1.34	1.54	3.36	1.54	3.76	-0.07	3.56	2.15	2.96	3.36	2.35	1.95	2.75	1.54	3.76	5.17	2.35	2.75	2.35	2.96
	High	Unambiguous	GILAADESTGTIGK		8.52638e-08	0	4	109	HORVU3Hr1G088570.1 HORVU3Hr1G088570; HORVU3Hr1G088540.1 HORVU3Hr1G088540	1332.7	-0.76	-1.66	-1.21		-2.26	1.34	-1.36	-0.46	1.49	0.44	0.29	-1.81	0.44	0.14	1.79		0.59		0.74	0.44	-0.01	-0.31	1.49	0.59	0.44	-1.06	-1.66	-3.31	0.44		-1.51	-0.61	-1.81	0.29	0.59	-0.61	0.89	0.29	1.19
	High	Unambiguous	FASINVENVEDNRR		1.34737e-08	0	3	533	HORVU3Hr1G088570.1 HORVU3Hr1G088570; HORVU3Hr1G088540.1 HORVU3Hr1G088540	1662.82	2.6	-0.29	0.98	2.24	-0.11	2.24	-0.65	3.68	0.44	1.7	1.52	1.7	1.34	3.68	1.7	1.16	5.31	2.24	2.06	3.5	1.16	3.14	1.88	2.06	1.88	2.42	2.24	0.62	0.98	2.42	5.85	0.08	0.44	-0.65	2.42	0.98	3.5	2.24	3.5
	High	Unambiguous	VTPEVIAEYTVR		3.32914e-08	0	3	263	HORVU3Hr1G088570.1 HORVU3Hr1G088570; HORVU3Hr1G088540.1 HORVU3Hr1G088540	1376.74	0.67	-0.21	-0.64	-2.38	-3.26	0.96	-2.24	-0.93	-0.06	1.54	-0.5	-0.35	-1.8	0.67	0.08	-1.37	-0.79	1.25	2.12	0.38	6.19	-0.64	-0.64	-1.08	1.54	-1.51	-0.5	0.08	0.08	0.96	0.81	0.52	-0.35	2.26	0.52	0.38	-0.5	2.55	-1.08
	High	Unambiguous	ELLFCTPGALQYLSGVILFEETLYQSTK		2.87303e-10	0	3	42	HORVU3Hr1G088570.1 HORVU3Hr1G088570; HORVU3Hr1G088540.1 HORVU3Hr1G088540	3163.63		-1.62	1.8							-1.71	-2			3.03	-0.57							-4.94	1.99			1.23		-0.1	0.28	-1.14	-0.86								-1.52
	High	Unambiguous	GTIELAGTNGETTTQGFDDLGKR		2.46632e-11	0	2	453	HORVU3Hr1G088540.1 HORVU3Hr1G088540	2381.16	-1.54	-5.58	-2.68	-3.81	-1.04	-1.42	-0.03	-1.67	-1.92	-0.41	0.72	-1.29	-0.41	-1.29	-0.28	2.36	-0.79	-0.54	-0.16	1.1	3.24	0.6	-1.92	-1.67	-0.91	-0.16	-3.56	-0.03	0.22	0.35	0.6	0.09	-4.57	0.85	-0.54	-0.79	-0.54	-2.68	-2.3
	High	Unambiguous	GTIELAGTNGETTTQGFDDLGKR	1xDeamidated [N/Q]	1.05755e-07	0	2	37	HORVU3Hr1G088540.1 HORVU3Hr1G088540	2382.14	4.24	3.24	2.1			3.87		2.61	1.47	3.24	0.59	5.13	0.21	1.22	3.61	3.11	5.25	3.61			6.76	2.1	2.35	0.97	1.85	1.72				1.85									0.75
	High	Unambiguous	ALRELLFCTPGALQYLSGVILFEETLYQSTK		1.53323e-08	0	3	12	HORVU3Hr1G088570.1 HORVU3Hr1G088570; HORVU3Hr1G088540.1 HORVU3Hr1G088540	3503.85		-3.88	-0.72																								-1.4	-0.12		-7.65									4.16
	High	Unambiguous	ALNDQHVLLEGTLLKPNMVTPGSDAK		2.24499e-19	0	2	528	HORVU3Hr1G088570.1 HORVU3Hr1G088570; HORVU3Hr1G088540.1 HORVU3Hr1G088540	2761.46	2.49	1.91	1.91	2.78	1.91	0.32	0.9	1.48	1.48	0.9	1.33	1.19	1.48	0.61	0.32	1.62	2.93	2.78	1.33	3.51	2.2	1.48	1.77	2.35	2.06	0.32	0.46	3.8	0.75	2.93	2.06	2.2	1.04	1.19	2.49	2.78	1.62	1.91	2.78
	High	Unambiguous	ALNDQHVLLEGTLLKPNMVTPGSDAKK		3.00975e-12	0	2	377	HORVU3Hr1G088570.1 HORVU3Hr1G088570; HORVU3Hr1G088540.1 HORVU3Hr1G088540	2889.55	3.34	3.68	1.95	-0.3	2.47	0.91	2.99	3.86	2.3	2.99	3.16	2.13	2.47	1.43	2.13	2.82	4.72	3.68	2.99	2.13	4.03	1.95	1.78	4.03	4.37	2.64	3.51	2.3	0.91	3.16	2.82	1.09	2.64	1.78	3.34	0.39	2.64	3.51	4.2
	High	Unambiguous	YAIICQENGLVPIVEPEILVDGPHDIDR		1.16059e-11	0	3	340	HORVU3Hr1G088570.1 HORVU3Hr1G088570; HORVU3Hr1G088540.1 HORVU3Hr1G088540	3117.59	-0.89	-8.3	1.43	-1.37	0.79	-1.14	0.94	-0.24	0.02	0.4	-0.88	0.15	-3.57	1.94	-1.78	0.66	0.02	0.66	0.15	-2.03	-1.14	0.53	0.79	-0.62	-2.42	1.56	3.35	0.4	-0.6	1.94	1.05	1.05	0.17	-0.75	-1.27	0.66	-22.25	-0.88	-0.69
	High	Unambiguous	ANSEATLGTYKGDATLGEGASESLHVK		3.82871e-10	0	3	238	HORVU3Hr1G088570.1 HORVU3Hr1G088570; HORVU3Hr1G088540.1 HORVU3Hr1G088540	2706.32	3.43	0.77	0.92	1.65	2.54	2.39	2.39	1.51	1.36	3.72	3.72	1.21	1.06	1.8	1.95	1.65	3.43	2.39	2.84	2.69	2.54	2.25	1.8	1.8	0.18	2.54	1.36	1.8	0.92	2.39	3.58	2.1	1.65	4.02	3.13	1.21	1.8	0.92	0.92
	High	Selected	VDKGTIELAGTNGETTTQGFDDLGKR		3.72163e-06	0.000341594	2	351	HORVU3Hr1G088540.1 HORVU3Hr1G088540	2723.35	2.03	1.74	0.86	2.32	2.76	1.59	1.59	1	1.44	1.44	3.06	0.27	1.88	1.15	1.74	2.76	0.41	0.41	2.03	2.32	3.35	2.91	0.41	1.15	-0.47	0.71	-0.47	0.41	1.15	2.76	2.03	1.3	1.44	2.76	1.74	0.12	1.88	0.71	-0.17
	High	Unambiguous	TVPAAVPAIVFLSGGQSEEEATLNLNAMNK	1xDeamidated [Q/N]	5.56328e-06	0.000341594	3	76	HORVU3Hr1G088570.1 HORVU3Hr1G088570; HORVU3Hr1G088540.1 HORVU3Hr1G088540	3072.56			4.9	5.32	4.9		6.55	7.79	4.7		4.31		5.29		3.14		5.1	8.44	-0.28	4.31	8.5	5.38	2.99	9.94	8.22	4.31		7.54		6.07		5.29	1.58	7.63	9.03	5.1	5.78	5.78
	High	Unambiguous	AWSGKTENEEK		3.43904e-06	0.000341594	1	423	HORVU3Hr1G088540.1 HORVU3Hr1G088540	1278.6	1.39	1.15	-0.02	0.92	2.09	1.86	2.8	0.69	0.92	-0.72	1.39	3.03	0.45	0.92	2.8	0.69	-0.02	0.92	-1.66	1.86	-0.72	-0.49	1.15	1.15	2.09	-1.9	1.39	1.62	0.45	1.86	1.15	0.92	1.86	1.86	0.45	0.22	1.86	1.15	0.69
	High	Unambiguous	YAIICQENGLVPIVEPEILVDGPHDIDR	1xDeamidated [N/Q]	2.33826e-05	0.000414347	3	59	HORVU3Hr1G088570.1 HORVU3Hr1G088570; HORVU3Hr1G088540.1 HORVU3Hr1G088540	3118.58					-9.74	-1.37	-3.97		-2.24	-1.85	-0.12		-3.2		-2.24	-1.57	-2.33	-0.12	-6.28	-8.3			-1.28	5.27		-1.85			-3.87	-3.97	-0.51	-0.6	-4.26				2.28	4.37	-1.76
	High	Unambiguous	NAAYIGTPGKGILAADESTGTIGK		0.00015119	0.000414347	3	3	HORVU3Hr1G088570.1 HORVU3Hr1G088570; HORVU3Hr1G088540.1 HORVU3Hr1G088540	2305.2			-1.24										-2.03	-2.94											-3.07			-0.33								-2.47
	High	Selected	NAAYIGTPGKGILAADESTGTIGKR		8.01355e-06	0.000414347	3	147	HORVU3Hr1G088570.1 HORVU3Hr1G088570; HORVU3Hr1G088540.1 HORVU3Hr1G088540	2461.3	1.97	1.97	3.59	1.16	0.83	1.81	0.34	0.51	1.81	-1.12	0.99	-1.61	0.67	-0.63	1.32	1.81	3.11	0.67	0.18	3.27	3.59	3.27	1.16	2.29	-0.31	0.67	0.99	0.18	2.13	1.48	1.81	1.48	1.32	-0.14	0.51	0.99	2.13	1.16	-0.47
	High	Unambiguous	NAAYIGTPGK		1.18223e-05	0.000414347	3	598	HORVU3Hr1G088570.1 HORVU3Hr1G088570; HORVU3Hr1G088540.1 HORVU3Hr1G088540	991.521	0.2	3.23	0.2	0.41	0.41	1.01	0.81	0.61	0.61	0.81	-0.8	1.82	1.41	3.23	-0.2	1.62	1.21	1.21	-0.6	0.41	1.82	1.82	0.2	0.81	2.83	1.62	-1.61	0.81	1.21	0.81	0.81	-0.2	3.43	1.41	0.61	1.21	0.61	2.42	1.21
	High	Unambiguous	ANSEATLGTYK		4.39805e-05	0.000414347	3	65	HORVU3Hr1G088570.1 HORVU3Hr1G088570; HORVU3Hr1G088540.1 HORVU3Hr1G088540	1154.57	-1.45			-1.27	-1.97	0.81	-1.79		2.02	1.33	-0.93	0.46	-0.93	-0.23	0.29	-0.58	-1.1		-1.62		-1.27	1.15	-0.23						0.11	-0.23		-0.58	2.36	-1.97	3.58	-0.41	-1.45	-1.1
	High	Unambiguous	VDKGTIELAGTNGETTTQGFDDLGKR	1xDeamidated [Q/N]	7.48132e-05	0.000414347	2	220	HORVU3Hr1G088540.1 HORVU3Hr1G088540	2724.33	5.11	1.58	2.32	4.67	3.79	3.2	3.79	3.64	2.02	4.08	2.61	2.32	2.46	2.61	4.52	1.29	3.05	2.61	2.61	4.67	5.55	3.93	1.44	3.93	1.73	4.67	2.46	3.05	2.9	2.02	4.08	3.79	4.37	3.34	2.02	2.02	3.49	2.9	2.76
	High	Unambiguous	EGNVLPGIK		0.000531057	0.000693743	3	150	HORVU3Hr1G088570.1 HORVU3Hr1G088570; HORVU3Hr1G088540.1 HORVU3Hr1G088540	926.531	-1.98			-0.9	-1.55	1.69	-0.9	-0.25	1.04	0.83	-0.47	-1.33	-0.04	-0.25	0.83	-0.25	2.12	2.34	-0.68	0.18	0.39	-0.9	0.83	-1.55	1.04	-1.55	-1.55	-2.2	0.18	-0.25	0.39	0.39	-0.04	0.39	1.26	-0.47	1.26	-0.04	2.12
	High	Unambiguous	VDKGTIELAGTNGETTTQGFDDLGK	1xDeamidated [N/Q]	0.000508668	0.000693743	2	13	HORVU3Hr1G088540.1 HORVU3Hr1G088540	2568.23				7.4	5.53		7.16	4.43		6.46	8.1	-0.78		10.79	10.2		7.05	9.73	7.05	5.06	11.83	8.45	7.63						7.75	6.81	-3.05	8.57		7.63	10.08	4.36		7.75	-3.05
	High	Unambiguous	TVPAAVPAIVFLSGGQSEEEATLNLNAMNK	1xAcetyl [N-Term]; 1xDeamidated [Q16]	0.000658681	0.000693743	3	8	HORVU3Hr1G088570.1 HORVU3Hr1G088570; HORVU3Hr1G088540.1 HORVU3Hr1G088540	3114.57		9.44									5.33								8.42				9.19				6.26							10.6
	High	Unambiguous	LQTKKPWNLSFSFGR		0.00153666	0.00137649	3	56	HORVU3Hr1G088570.1 HORVU3Hr1G088570; HORVU3Hr1G088540.1 HORVU3Hr1G088540	1808.98	1.3	1.97	1.52					3.07	-0.02		-0.91							-0.02	0.64	0.64	0.2			1.3	1.08	0.64	1.97	0.86	-0.69	1.3	-4.67							0.42	1.97
	High	Unambiguous	IGATEPSQLSIDQNAQGLAR	1xAcetyl [N-Term]	0.00297451	0.00137649	2	1	HORVU3Hr1G088540.1 HORVU3Hr1G088540	2111.07	4.93	8.91		-8.57		4.93	1.24		-4.59			-6.01	-2.46			5.36		9.48			4.51				-2.88	1.95	2.94			4.79					-6.72		-5.44	-6.01
	High	Unambiguous	ALRELLFCTPGALQYLSGVILFEETLYQSTK	1xDeamidated [Q]	0.00212265	0.00137649	3	4	HORVU3Hr1G088570.1 HORVU3Hr1G088570; HORVU3Hr1G088540.1 HORVU3Hr1G088540	3504.83																												-8.15		7.67	3.39						8.95		8.52
	High	Unambiguous	ALQQSTLK		0.00189232	0.00137649	4	970	HORVU3Hr1G088570.1 HORVU3Hr1G088570; HORVU3Hr1G088540.1 HORVU3Hr1G088540	888.515	0.92	2.49	1.82	1.14	-0.43	0.69	3.17	1.14	1.59	-0.43	-2.46	1.59	-0.21	1.37	1.82	1.37	-0.88	0.47	0.69	2.27	1.59	-4.71	1.82	3.17	0.69	2.49	-0.43	0.24	0.69	2.72	-1.11	0.92	1.82	2.04	3.39	-0.21	-2.23	2.04	3.17
	High	Selected	AWSGKTENEEKAR		0.00390744	0.00185291	1	65	HORVU3Hr1G088540.1 HORVU3Hr1G088540	1505.73	-1.68	-2.74	-0.08	-1.89		-7.26		-2.49				-1.41		-8.32		-4.33	-5.66	-5.13	-1.49	-5.4	-0.7	-7.52		-0.35	-3.8		-1.68	-0.88	-5.66	0.98	1.69	-0.3			-12.04		-5.93		-4.07
	High	Unambiguous	EGNVLPGIKVDK		0.00396395	0.00185291	3	41	HORVU3Hr1G088570.1 HORVU3Hr1G088570; HORVU3Hr1G088540.1 HORVU3Hr1G088540	1268.72				0.05	-0.18	1	-0.89		1.71	-0.89	-1.6	-1.6	0.05	1.95	1	-0.65	1.71	0.76	1.71		1	0.76	2.42			1.47		1.71	1.24	1.71	-0.42	-1.84	-2.07	1	3.84	2.18	0.76	1.24	1.95
	High	Unambiguous	TENEEKAR		0.00441464	0.00185291	1	22	HORVU3Hr1G088540.1 HORVU3Hr1G088540	976.469						0.11	-0.71	-0.09		1.14		-1.73	-3.76	1.55		0.11					5.77	-1.32	-2.14				-2.76		1.96	-1.12				0.32					6.87
	High	Unambiguous	ALNDQHVLLEGTLLKPNMVTPGSDAK	1xDeamidated [N/Q]	0.004952	0.00196055	2	22	HORVU3Hr1G088570.1 HORVU3Hr1G088570; HORVU3Hr1G088540.1 HORVU3Hr1G088540	2762.44		-6.64		6.1		7.84	8.13	5.82	7.41	6.83	8.86	-5.99			9.87	6.93	9.44	8.86	7.84	9.72	8.42	9.87	2.92	2.63	7.99	9.15		0.46		2.77	7.41		9.29	9.87	6.39	11.46		11.03
	High	Unambiguous	YYEAGAR		0.00509626	0.0020757	4	571	HORVU3Hr1G088570.1 HORVU3Hr1G088570; HORVU3Hr1G088540.1 HORVU3Hr1G088540	829.384	-0.93	-1.89	-0.45	-2.62	1.24	0.52	-0.93	-2.13	-0.69	-4.55	-0.69	-2.62	-1.17	-3.82	-2.38	-3.58	-0.93	-2.62	-0.93	0.04	-1.89	-3.1	0.04	-1.89	-5.27	-2.38	-1.41	-0.69	-3.82	-1.89	-2.38	-2.62	-0.45	0.04	-5.03	-1.89	-1.41	-4.3	0.28
	High	Unambiguous	ELLFCTPGALQYLSGVILFEETLYQSTK	1xDeamidated [Q]	0.00761814	0.00300571	3	8	HORVU3Hr1G088570.1 HORVU3Hr1G088570; HORVU3Hr1G088540.1 HORVU3Hr1G088540	3164.61	3.5	-8.92	-7.78								8.65		2.55				8.78								6.06	1.88	5.87	-7.41						8.9			8.14	0.84
	High	Unambiguous	ALQQSTIK	1xDeamidated [Q]	0.0109079	0.0038095	4	102	HORVU3Hr1G088570.1 HORVU3Hr1G088570; HORVU3Hr1G088540.1 HORVU3Hr1G088540	889.499	-1.12	1.35	-3.37	-3.82	-1.8	-0.45	-0.22	1.35	-3.15	-2.25	-2.02				-5.17	-4.5	-3.82	-1.8	-2.02	0	-4.72	-1.12	-5.17	-0.45			-0.67	-5.17	-0.45	-1.12	-2.7	-3.37	-3.37	-2.02	-1.8	-2.25	-2.7		-0.9
	High	Unambiguous	GGKPFVDILKEGNVLPGIK		0.011388	0.00391291	3	4	HORVU3Hr1G088570.1 HORVU3Hr1G088570; HORVU3Hr1G088540.1 HORVU3Hr1G088540	1981.15	-2.28	1.06	2.88			0.65	0.25	2.27	-1.77	2.47	-0.15	3.08		2.07		2.27		0.65	1.66	1.26	-0.56	1.66	0.65		1.05	-0.35	2.27	-0.76		0.65	3.08	1.26	0.25	-0.76	0.65	1.26	-0.56	4.29	-1.36
	High	Unambiguous	ALNDQHVLLEGTLLKPNMVTPGSDAK	1xOxidation [M18]	0.0185549	0.00543749	2	4	HORVU3Hr1G088570.1 HORVU3Hr1G088570; HORVU3Hr1G088540.1 HORVU3Hr1G088540	2777.45		3.29	-0.3			-0.01				1		-3.18		1.86								-0.01
	High	Unambiguous	AAFLVR		0.0261886	0.00709161	1	264	HORVU3Hr1G088540.1 HORVU3Hr1G088540	676.414	-7.91	-6.13	-3.18	-3.47	-0.81	-3.18	-1.11	-7.02	-5.25	-3.77	-4.65	-2.58	-3.47	-6.43	-5.84	-3.77	-2.88	-3.77	-2.58	-6.13	-8.79	-5.54	-6.72	-5.54	-3.18	-3.77	-2.88	-2.58	-5.84	-4.06	-6.13	-4.36	-7.32	-1.99	-2.58	-1.99	-2.29	-2.29	-4.65
	High	Unambiguous	GGKPFVDILK		0.0300159	0.00792226	3	9	HORVU3Hr1G088570.1 HORVU3Hr1G088570; HORVU3Hr1G088540.1 HORVU3Hr1G088540	1073.64	-1.15		2.39	-4.5	0.36	-2.43	-0.75	-2.71		-1.52	-2.45	6.67	7.23	6.67	8.91	0.16	-0.96	-1.89	-2.64		9.84	-0.96	-3.01		-2.27			8.91	-3.94	0.08	-2.64	7.61	-2.45	-0.48	-1.31	6.49		1.48	-2.64
	High	Selected	DKGTIELAGTNGETTTQGFDDLGKR	1xAcetyl [N-Term]	0.0346503	0.00919146	2	2	HORVU3Hr1G088540.1 HORVU3Hr1G088540	2666.29		9.07	0.67																											2.17
	High	Unambiguous	CKANSEATLGTYK		0.0344024	0.00919146	3	8	HORVU3Hr1G088570.1 HORVU3Hr1G088570; HORVU3Hr1G088540.1 HORVU3Hr1G088540	1385.67				1.72					-0.65		-1.08					-1.73		1.09	-0.65		-1.08	0.22					1.52		-1.29	-0.86	-1.73				-0.21	3.45			-0.21
TRUE	High	Master Protein	HORVU5Hr1G021300.3 HORVU5Hr1G021300	chr5H:102721679-102730011 HC_G|Heat shock 70 kDa protein 3|none|PF00012|IPR013126, IPR018181, IPR029047, IPR029048	0	67	37	7230	4	1	647	71.1	5.19	306.81	425.12	635.78	428.75	576.14	381.04	470.63	334.5	433.84	434	553.43	216.53	363.11	327.95	495.8	418.22	498.15	370.03	514.47	399.65	480.67	399.96	515.88	483.76	309.63	419.73	366.1	483.28	432.89	552.51	349.38	442.77	295.98	483.21	349.36	506.29
	Confidence	PSM Ambiguity	Sequence	Modifications	Qvality PEP	Qvality q-value	# Proteins	# PSMs	Master Protein Accessions	Theo. MH+ [Da]	DeltaM [ppm] (by Search Engine): A Sequest HT	DeltaM [ppm] (by Search Engine): AA Sequest HT	DeltaM [ppm] (by Search Engine): AB Sequest HT	DeltaM [ppm] (by Search Engine): AC Sequest HT	DeltaM [ppm] (by Search Engine): AD Sequest HT	DeltaM [ppm] (by Search Engine): AE Sequest HT	DeltaM [ppm] (by Search Engine): AF Sequest HT	DeltaM [ppm] (by Search Engine): AG Sequest HT	DeltaM [ppm] (by Search Engine): AH Sequest HT	DeltaM [ppm] (by Search Engine): AI Sequest HT	DeltaM [ppm] (by Search Engine): AJ Sequest HT	DeltaM [ppm] (by Search Engine): AK Sequest HT	DeltaM [ppm] (by Search Engine): AL Sequest HT	DeltaM [ppm] (by Search Engine): AM Sequest HT	DeltaM [ppm] (by Search Engine): AN Sequest HT	DeltaM [ppm] (by Search Engine): AO Sequest HT	DeltaM [ppm] (by Search Engine): AP Sequest HT	DeltaM [ppm] (by Search Engine): AQ Sequest HT	DeltaM [ppm] (by Search Engine): AR Sequest HT	DeltaM [ppm] (by Search Engine): AS Sequest HT	DeltaM [ppm] (by Search Engine): AT Sequest HT	DeltaM [ppm] (by Search Engine): AU Sequest HT	DeltaM [ppm] (by Search Engine): AV Sequest HT	DeltaM [ppm] (by Search Engine): B Sequest HT	DeltaM [ppm] (by Search Engine): C Sequest HT	DeltaM [ppm] (by Search Engine): D Sequest HT	DeltaM [ppm] (by Search Engine): E Sequest HT	DeltaM [ppm] (by Search Engine): F Sequest HT	DeltaM [ppm] (by Search Engine): G Sequest HT	DeltaM [ppm] (by Search Engine): H Sequest HT	DeltaM [ppm] (by Search Engine): I Sequest HT	DeltaM [ppm] (by Search Engine): J Sequest HT	DeltaM [ppm] (by Search Engine): K Sequest HT	DeltaM [ppm] (by Search Engine): L Sequest HT	DeltaM [ppm] (by Search Engine): M Sequest HT	DeltaM [ppm] (by Search Engine): N Sequest HT	DeltaM [ppm] (by Search Engine): O Sequest HT	DeltaM [ppm] (by Search Engine): P Sequest HT	DeltaM [ppm] (by Search Engine): Q Sequest HT
	High	Unambiguous	TTPSYVAFTDSER		3.45081e-08	0	3	382	HORVU5Hr1G113180.1 HORVU5Hr1G113180; HORVU5Hr1G021300.3 HORVU5Hr1G021300; HORVU6Hr1G081460.2 HORVU6Hr1G081460	1473.69	0.89	-0.88	1.57	1.84	-1.42	1.3	1.02	0.75	0.62	2.38	2.25	0.35	0.07	2.25	0.89	0.07	-0.74	-0.2	3.33	1.16	2.92	-0.06	0.89	-0.6	-0.06	-1.69	-2.5	-1.69	-0.2	1.43	1.3	0.07	0.62	0.21	2.65	1.16	1.3	1.97	-0.6
	High	Unambiguous	IINEPTAAAIAYGLDKK		1.0437e-14	0	7	333	HORVU4Hr1G059260.3 HORVU4Hr1G059260; HORVU5Hr1G113180.1 HORVU5Hr1G113180; HORVU4Hr1G059390.1 HORVU4Hr1G059390; HORVU3Hr1G086500.1 HORVU3Hr1G086500; HORVU5Hr1G021300.3 HORVU5Hr1G021300; HORVU6Hr1G081460.2 HORVU6Hr1G081460; HORVU1Hr1G072220.4 HORVU1Hr1G072220	1787.99	2.95	1.77	3.45	0.43	1.1	3.28	0.77	0.6	0.1	2.28	1.77	0.6	1.77	2.61	1.44	2.95	1.94	2.78	2.44	0.77	7.31	1.77	2.28	2.28	3.95	1.27	4.12	-0.58	1.94	3.12	-0.41	1.94	2.28	2.61	-0.58	-0.91	0.93	-0.58	0.43
	High	Unambiguous	LINEPTAAAIAYGLDK		6.29505e-09	0	11	438	HORVU4Hr1G059260.3 HORVU4Hr1G059260; HORVU5Hr1G113180.1 HORVU5Hr1G113180; HORVU4Hr1G059390.1 HORVU4Hr1G059390; HORVU2Hr1G122780.2 HORVU2Hr1G122780; HORVU3Hr1G086500.1 HORVU3Hr1G086500; HORVU6Hr1G008880.1 HORVU6Hr1G008880; HORVU5Hr1G021300.3 HORVU5Hr1G021300; HORVU6Hr1G081460.2 HORVU6Hr1G081460; HORVU1Hr1G072220.4 HORVU1Hr1G072220	1659.9	-0.78	0.43	-3.91	-3.31	-1.5	-1.38	-0.9	-0.9	-0.05	-0.66	1.63	-3.19	-2.46	-1.02	0.43	0.07	0.19	-0.05	-0.05	-0.9	1.39	1.15	-0.9	-0.17	-0.42	-1.02	-0.29	-1.26	-0.17	-0.42	-0.54	-2.46	-0.66	-0.66	-0.17	-1.98	-1.14	0.07	-0.17
	High	Unambiguous	VQQLLQDFFNGKELCK		8.86823e-10	0	8	215	HORVU4Hr1G059260.3 HORVU4Hr1G059260; HORVU5Hr1G113180.1 HORVU5Hr1G113180; HORVU4Hr1G059390.1 HORVU4Hr1G059390; HORVU3Hr1G086500.1 HORVU3Hr1G086500; HORVU5Hr1G021300.3 HORVU5Hr1G021300; HORVU6Hr1G081460.2 HORVU6Hr1G081460; HORVU1Hr1G072220.4 HORVU1Hr1G072220	1909.98	-2.46	0.21	-0.1	0.52	-1.05	-0.1	-0.1	-0.1	-2.15	-1.67	-1.52	-2.77	0.52	-3.72	0.37	0.84	-0.57	-0.57	0.21	-1.05	-2.62	3.19	-0.73	-0.42	0.37	-2.15	-1.05	0.84	-0.42	-0.73	0.21	-2.77	-2.77	-2.3	-1.52	0.21	1	-1.05	-3.09
	High	Unambiguous	VQDLLLLDVTPLSLGLETAGGVMTVLIPR		2.04638e-11	0	4	329	HORVU3Hr1G086500.1 HORVU3Hr1G086500; HORVU5Hr1G021300.3 HORVU5Hr1G021300; HORVU6Hr1G081460.2 HORVU6Hr1G081460	3033.73	-0.49	-3.55	0.01	-1.57	-2.27	-1.18	0.4	0.01	0.9	0.4	-0.88	3.07	-0.88	0.21	-1.77	-2.96	2.78	-0.98	1	1	1	-1.97	0.9	-5.03	-1.67	-2.56	1.2	2.09	-5.03	-1.47	3.17	0.7	-2.17	-2.27	1.79	0.7	1.79	-2.66	4.98
	High	Unambiguous	FTDSTVQSDIKLWPFK		1.161e-07	0	2	299	HORVU5Hr1G021300.3 HORVU5Hr1G021300; HORVU6Hr1G081460.2 HORVU6Hr1G081460	1911.99	-5.62	-1.7	1.44	1.28	-0.91	-1.07	0.97	-1.23	-7.34	-1.7	-1.38	-2.48	-1.23	-0.28	-4.36	0.5	-2.95	-1.23	-0.44	-1.23	-2.79	0.66	-0.28	-1.07	-0.28	-0.75	-6.87	-0.13	-1.23	-0.91	-1.07	-1.7	-1.23	-3.27	-1.85	0.03	-1.38	-3.58	-2.79
	High	Unambiguous	EQVFSTYSDNQPGVLIQVYEGER		4.48752e-21	0	6	648	HORVU4Hr1G059260.3 HORVU4Hr1G059260; HORVU4Hr1G059390.1 HORVU4Hr1G059390; HORVU5Hr1G021300.3 HORVU5Hr1G021300; HORVU6Hr1G081460.2 HORVU6Hr1G081460; HORVU1Hr1G072220.4 HORVU1Hr1G072220	2658.27	0.09	0.43	0.77	2.35	0.66	-2.95	-0.7	0.21	-1.71	1.22	-0.13	-0.47	-1.15	1.22	1.79	1.56	-1.37	-0.13	1.11	-0.02	-2.62	-0.7	1.11	0.43	-0.7	-2.05	0.32	-0.36	0.21	0.66	0.77	0.32	-1.15	-0.81	0.09	0.54	-1.37	1.22	-1.26
	High	Unambiguous	EQVFSTYSDNQPGVLIQVYEGER	1xDeamidated [Q/N]	9.09547e-08	0	6	142	HORVU4Hr1G059260.3 HORVU4Hr1G059260; HORVU4Hr1G059390.1 HORVU4Hr1G059390; HORVU5Hr1G021300.3 HORVU5Hr1G021300; HORVU6Hr1G081460.2 HORVU6Hr1G081460; HORVU1Hr1G072220.4 HORVU1Hr1G072220	2659.25		9.52	8.99	1.78	3.13	3.47	2.23	4.15		2.23	2.23		2.79		3.7	2.79	0.88	1.67	6.63	1.78	3.7	2.57	2.91		6.96	7.11	10.12	8.24	4.15	1.78	0.31	0.76	-0.14	10.27	1.33	2.57	1.21	2	6.73
	High	Unambiguous	VVAGPGDKPMINVQYKGEEK		2.47562e-09	0	2	58	HORVU5Hr1G021300.3 HORVU5Hr1G021300; HORVU6Hr1G081460.2 HORVU6Hr1G081460	2159.12	-8.37	7.19		2.06	-0.9	0.4	2.06	1.88	0.77	0.21	0.58	-0.53	1.32	3.17	3.17	1.14	2.99		0.58	2.06	0.77	0.4	1.69	-9.9	1.69	1.51	-1.28	-0.53	3.17	1.51	0.03	-1.09	0.95	0.58	1.51	-8.51		-0.53	5.94
	High	Unambiguous	NALENYSYNMR		8.34471e-08	0	3	384	HORVU5Hr1G021300.3 HORVU5Hr1G021300; HORVU6Hr1G081460.2 HORVU6Hr1G081460	1374.61	-1.27	1.2	-0.11	0.62	-0.84	1.34	-2.44	-0.11	1.05	1.34	-0.26	-0.84	-0.4	1.49	0.76	0.18	-0.4	0.47	1.78	1.2	4.25	-0.98	0.76	1.64	0.18	0.18	-1.57	-0.11	1.05	0.18	0.47	-0.98	-0.4	-0.11	2.07	1.64	0.76	0.33	1.34
	High	Unambiguous	MYQGAGADMEGGMDDDTPAASGGPGPKIEEVD		1.50004e-12	0	2	43	HORVU5Hr1G021300.3 HORVU5Hr1G021300	3168.31		1.11	-0.12		-0.41		-0.6	0.92	-2.39		0.92			4.52			-1.83		2.53	3.85	3.95		1.11	0.73		1.11	0.16	0.16	2.91	0.54	3.38	0.82		1.77	1.11	-0.97		0.07	0.35
	High	Unambiguous	NAVVTVPAYFNDSQR		9.61502e-09	0	7	816	HORVU4Hr1G059260.3 HORVU4Hr1G059260; HORVU5Hr1G113180.1 HORVU5Hr1G113180; HORVU4Hr1G059390.1 HORVU4Hr1G059390; HORVU3Hr1G086500.1 HORVU3Hr1G086500; HORVU5Hr1G021300.3 HORVU5Hr1G021300; HORVU6Hr1G081460.2 HORVU6Hr1G081460; HORVU1Hr1G072220.4 HORVU1Hr1G072220	1680.83	1.75	0.14	1.39	0.5	2.1	3.18	0.14	-0.04	0.32	2.64	0.14	1.03	-1.11	2.46	0.5	1.21	0.5	0.32	2.64	1.21	6.92	0.5	1.75	-0.57	1.21	0.32	3.53	1.57	0.68	2.1	0.5	3	1.03	1.75	0.86	1.57	1.39	1.39	-0.75
	High	Unambiguous	NQVAMNPINTVFDAK		4.26403e-10	0	4	341	HORVU5Hr1G113180.1 HORVU5Hr1G113180; HORVU4Hr1G059390.1 HORVU4Hr1G059390; HORVU5Hr1G021300.3 HORVU5Hr1G021300; HORVU6Hr1G081460.2 HORVU6Hr1G081460	1661.83	0.82	1.42	-0.63	1.06	0.21	-0.03	-0.51	-0.63	0.46	0.34	0.21	0.21	-0.03	-3.03	0.21	-0.63	0.09	0.82	1.78	2.02	0.7	0.21	-0.15	2.5	-0.03	-0.15	-0.63	0.94	-1.59	0.46	0.46	0.58	0.21	-0.27	0.34	-0.27	-0.39	1.3	1.9
	High	Unambiguous	NQVAMNPINTVFDAKR		6.82277e-12	0	4	203	HORVU5Hr1G113180.1 HORVU5Hr1G113180; HORVU4Hr1G059390.1 HORVU4Hr1G059390; HORVU5Hr1G021300.3 HORVU5Hr1G021300; HORVU6Hr1G081460.2 HORVU6Hr1G081460	1817.93	1.85	1.36	1.36	2.02	1.36	0.37	0.2	2.35	2.18	1.19	1.52	0.04	0.04	0.86	0.04	1.03	2.84	1.69	0.86	1.19	2.18	2.02	1.69	2.35	2.18	0.86	1.36	0.2	-1.61	1.19	1.19	2.51	1.69	1.52	-0.46	0.04	0.2	2.02	2.02
	High	Unambiguous	ATAGDTHLGGEDFDNR		5.78633e-08	0	6	417	HORVU5Hr1G113180.1 HORVU5Hr1G113180; HORVU4Hr1G059390.1 HORVU4Hr1G059390; HORVU3Hr1G086500.1 HORVU3Hr1G086500; HORVU5Hr1G021300.3 HORVU5Hr1G021300; HORVU6Hr1G081460.2 HORVU6Hr1G081460; HORVU1Hr1G072220.4 HORVU1Hr1G072220	1675.73	3.93	3.03	0.35	2.49	0.88	1.24	1.24	2.49	2.49	-0.01	2.67	1.24	0.7	0.53	1.06	2.49	-0.01	0.17	2.32	1.06	3.03	1.6	1.96	0.88	1.96	1.96	0.7	1.78	2.67	0.88	2.14	-0.37	1.96	1.42	1.6	-0.55	1.6	-0.37	1.96
	High	Unambiguous	MREIAEAFLGSTVK		1.04998e-07	0	1	259	HORVU5Hr1G021300.3 HORVU5Hr1G021300	1551.82	-0.64	1.29	0.71	0.52	0.71	0.33	-0.64	2.26	1.1	-0.06	0.13	2.84	-1.8	2.65	-1.61	-0.06	-0.45	2.07	1.29	0.91	2.84	0.13	-0.06	1.49	2.45	-1.22	2.26	0.52	-0.64	1.49	-0.45	2.65	2.65	-0.64	-0.83	-1.8	-0.25	1.87	1.49
	High	Unambiguous	TLSSTAQTTIEIDSLFEGIDFYSTITR		9.5429e-13	0	3	128	HORVU5Hr1G021300.3 HORVU5Hr1G021300; HORVU6Hr1G081460.2 HORVU6Hr1G081460	3009.49		-0.86	0.65		-1.65		4.04			-0.15	-1.45	-1.55	-1.55	1.94	-1.75		4.63		-2.24		-1.35	-1.25	0.25	-4.04		0.15	1.14	0.35	2.14	0.05		1.64	1.14	-0.75				-1.95	0.65
	High	Selected	SINPDEAVAYGAAVQAAILSGEGNEK		9.03794e-19	0	6	128	HORVU5Hr1G113180.1 HORVU5Hr1G113180; HORVU3Hr1G086500.1 HORVU3Hr1G086500; HORVU5Hr1G021300.3 HORVU5Hr1G021300; HORVU6Hr1G081460.2 HORVU6Hr1G081460; HORVU1Hr1G072220.4 HORVU1Hr1G072220	2574.27	3.48			-0.02	1.96	-0.14	0.91	1.06	1.38	1.03	0.21	4.71	0.21	0.33	1.26	1.26	0.91	0.21	0.91	1.21	-1.42	1.49	1.26	0.91	0.33	1.84	1.38	1.73	1.49	-0.49	0.56	0.21		2.08	-0.25	1.14	-0.11	0.21	-3.29
	High	Unambiguous	FTDSTVQSDIK		3.41444e-06	0.000341594	2	82	HORVU5Hr1G021300.3 HORVU5Hr1G021300; HORVU6Hr1G081460.2 HORVU6Hr1G081460	1240.61				1.09	-0.85	-0.52	-1.17	0.93	-0.85	1.25	0.93			1.57	2.22	1.25	-1.17	-1.01	1.25	-0.04	1.09	-1.01	-0.52		2.22	-1.01			-0.36	-0.36	0.61	-1.17	-1.17	-0.85	-0.68	0.12	-0.68	-2.3
	High	Unambiguous	MYQGAGADMEGGMDDDTPAASGGPGPK		8.48134e-07	0.000341594	2	25	HORVU5Hr1G021300.3 HORVU5Hr1G021300	2583.04						0.43	-2.7		1.71		-0.84	1.71		3.45			-0.5		0.55		2.87	-2.93	0.2					-3.4						0.08		1.25		-2.01	0.32
	High	Unambiguous	MYQGAGADMEGGMDDDTPAASGGPGPKIEEVD	1xDeamidated [Q3]	3.20081e-06	0.000341594	2	20	HORVU5Hr1G021300.3 HORVU5Hr1G021300	3169.29	6.12	7.16	5.65	11.99	4.79		7.54			9.91	5.65		6.97		8.01	10.66		7.82	6.4		10.66	7.26	9.43	8.2	6.59	9.43	5.74	6.69		7.16		8.3		8.87		4.23		5.74
	High	Unambiguous	DAGVIAGINVLR		1.1466e-06	0.000341594	5	477	HORVU5Hr1G021300.3 HORVU5Hr1G021300; HORVU6Hr1G081460.2 HORVU6Hr1G081460; HORVU2Hr1G112630.2 HORVU2Hr1G112630; HORVU5Hr1G078400.1 HORVU5Hr1G078400	1197.69	-1.9	0.27	-0.56	-2.73	-0.06	-0.9	0.77	1.61	0.27	-0.9	-1.06	-2.07	-0.9	-2.07	-0.9	-2.57	1.61	0.77	-0.73	-0.06	1.44	-0.06	-0.56	-1.06	2.94	-1.23			-1.9	-0.4	0.61	-1.4	0.11	-1.56	-0.4	-3.07	-0.56	1.61	0.77
	High	Unambiguous	VQQLLQDFFNGK		2.50757e-06	0.000341594	9	58	HORVU4Hr1G059260.3 HORVU4Hr1G059260; HORVU5Hr1G113180.1 HORVU5Hr1G113180; HORVU4Hr1G059390.1 HORVU4Hr1G059390; HORVU3Hr1G086500.1 HORVU3Hr1G086500; HORVU5Hr1G021300.3 HORVU5Hr1G021300; HORVU6Hr1G081460.2 HORVU6Hr1G081460; HORVU1Hr1G072220.4 HORVU1Hr1G072220	1436.75				-0.92	-0.5	-2.17	-1.75			-1.89	-2.17		-1.89	-0.22	-1.89	0.06	-1.75	-0.92	-1.06			-1.47	-2.45		-1.75	-2.45	-3		-2.45	-2.31			-2.45	-2.45	-2.87	-2.45	-2.45	-2.31
	High	Unambiguous	EIAEAFLGSTVK		0.000104087	0.000414347	1	50	HORVU5Hr1G021300.3 HORVU5Hr1G021300	1264.68	-3.18		-1.76	-2.55		-5.23	-6.5	-2.55	-5.39	-0.81	-2.55			-3.81	-3.97	-2.55	-6.5	0.14	-2.07	0.3	-2.55	-1.91	-3.34	-3.34	-1.6	-4.44	-1.76	-3.65		-2.23	-2.86	-2.86	-3.02	-1.6	-5.08	-1.76		-2.07	-3.65
	High	Unambiguous	VEIIANDQGNR		3.00619e-05	0.000414347	12	112	HORVU5Hr1G113180.1 HORVU5Hr1G113180; HORVU4Hr1G059390.1 HORVU4Hr1G059390; HORVU2Hr1G122780.2 HORVU2Hr1G122780; HORVU3Hr1G086500.1 HORVU3Hr1G086500; HORVU6Hr1G008880.1 HORVU6Hr1G008880; HORVU5Hr1G021300.3 HORVU5Hr1G021300; HORVU6Hr1G081460.2 HORVU6Hr1G081460; HORVU1Hr1G072220.4 HORVU1Hr1G072220; HORVU5Hr1G078400.1 HORVU5Hr1G078400	1228.63	1.37	2.35	-4	-0.09	-3.02	0.07	-1.56	-0.75	0.23	0.72	-1.72	1.7	-0.09	-0.91	-0.75	-0.09	-1.72	-4.65	-3.02	-0.58	-0.42	-0.09	1.86		0.39	-0.26	-5.63	-2.37	0.56	-2.21	1.53	-3.19	0.88	-0.26	4.14	-1.07	-0.75	-3.84	2.51
	High	Unambiguous	MDKSTVHDVVLVGGSTR		7.10128e-06	0.000414347	6	110	HORVU4Hr1G059390.1 HORVU4Hr1G059390; HORVU3Hr1G086500.1 HORVU3Hr1G086500; HORVU5Hr1G021300.3 HORVU5Hr1G021300; HORVU6Hr1G081460.2 HORVU6Hr1G081460; HORVU1Hr1G072220.4 HORVU1Hr1G072220	1800.93	0.51	1.84	2.28	1.17	1.4	1.16	2.06	1.62	2.73	1.4	1.17	-0.83		0.51	2.28	1.17	2.28	3.39	-0.16	1.4	2.51	0.51	0.95	2.06	1.17		1.62	0.73	2.73	0.51	0.95	0.95		2.73	3.62	0.95	2.51	1.84	3.62
	High	Unambiguous	MVNHFVQEFK		9.95116e-06	0.000414347	8	264	HORVU4Hr1G059260.3 HORVU4Hr1G059260; HORVU5Hr1G113180.1 HORVU5Hr1G113180; HORVU4Hr1G059390.1 HORVU4Hr1G059390; HORVU3Hr1G086500.1 HORVU3Hr1G086500; HORVU5Hr1G021300.3 HORVU5Hr1G021300; HORVU6Hr1G081460.2 HORVU6Hr1G081460; HORVU1Hr1G072220.4 HORVU1Hr1G072220	1278.63	0.23	-0.01	1.17	2.34	1.64	0.93	1.87	4.22	0.93	0.46	0.46	0.93	0.46	2.11	2.11	-0.24	2.34	0.7	2.81	3.75	1.4	0.23	2.81	1.17	-1.18	1.17	0.23	-0.01	0.7	3.28	3.51	-0.01	0.46	1.17	1.87	1.17	1.4	2.81	1.64
	High	Unambiguous	STVHDVVLVGGSTR		1.09246e-05	0.000414347	6	207	HORVU4Hr1G059390.1 HORVU4Hr1G059390; HORVU3Hr1G086500.1 HORVU3Hr1G086500; HORVU5Hr1G021300.3 HORVU5Hr1G021300; HORVU6Hr1G081460.2 HORVU6Hr1G081460; HORVU1Hr1G072220.4 HORVU1Hr1G072220	1426.76	-1.49	-0.43	0.41	-0.86	-0.43	0.41	0.2	-0.86	-0.65	0.62	-0.43	-2.33	-2.54	-1.49	2.51	1.46	-0.22	-0.22	0.83	-0.43	-0.86	1.25	0.41	0.41	1.46	0.2	0.41	-0.43	3.35	-0.22	-1.7	-2.12	-2.12	-1.07	-0.01	-2.96	0.41	-0.65	0.83
	High	Unambiguous	VQQLLQDFFNGKELCK	1xDeamidated [Q/N]	9.60029e-06	0.000414347	8	81	HORVU4Hr1G059260.3 HORVU4Hr1G059260; HORVU5Hr1G113180.1 HORVU5Hr1G113180; HORVU4Hr1G059390.1 HORVU4Hr1G059390; HORVU3Hr1G086500.1 HORVU3Hr1G086500; HORVU5Hr1G021300.3 HORVU5Hr1G021300; HORVU6Hr1G081460.2 HORVU6Hr1G081460; HORVU1Hr1G072220.4 HORVU1Hr1G072220	1910.97	0.52	-1.84	-0.74	-2.47	-4.04	1.14	0.99	-2.15	-4.35	-1.21	-3.72	-0.11	-0.74	-0.9	-1.37	0.83	-0.9	-2	0.2	-1.05	-2.62	1.14	-0.27	-2.47	-0.11	-1.84	-0.9	-1.37	-0.58	-2.47	-2.62	-0.11	-4.98	-4.19	-2.62	-3.09	0.52	-2.94	-1.21
	High	Unambiguous	VQDLLLLDVTPLSLGLETAGGVMTVLIPR	1xDeamidated [Q2]	0.000131912	0.000414347	4	14	HORVU3Hr1G086500.1 HORVU3Hr1G086500; HORVU5Hr1G021300.3 HORVU5Hr1G021300; HORVU6Hr1G081460.2 HORVU6Hr1G081460	3034.71		11.36	6.43	8.13		10.57	4.65	16.02	8.53		3.86	0.7	2.08	9.59	5.74	7.02	5.14	5.63	5.54	5.89	5.43	3.46	8.21	13.15			8.9	6.92	7.32		16.22	4.25			2.77	6.42	8.13	1.88
	High	Selected	SINPDEAVAYGAAVQAAILSGEGNEK	1xDeamidated [Q15]	1.49827e-05	0.000414347	6	4	HORVU5Hr1G113180.1 HORVU5Hr1G113180; HORVU3Hr1G086500.1 HORVU3Hr1G086500; HORVU5Hr1G021300.3 HORVU5Hr1G021300; HORVU6Hr1G081460.2 HORVU6Hr1G081460; HORVU1Hr1G072220.4 HORVU1Hr1G072220	2575.25				1.69	-1.89	3.24	1.72				-2.01	2.47				2.19	4.49		4.62	4.18	7.19						8.89		8.83			8.58	7.28	6.04		8.27		4.95
	High	Unambiguous	ITITNDKGR		9.08154e-05	0.000414347	8	327	HORVU4Hr1G059260.3 HORVU4Hr1G059260; HORVU5Hr1G113180.1 HORVU5Hr1G113180; HORVU4Hr1G059390.1 HORVU4Hr1G059390; HORVU3Hr1G086500.1 HORVU3Hr1G086500; HORVU5Hr1G021300.3 HORVU5Hr1G021300; HORVU6Hr1G081460.2 HORVU6Hr1G081460; HORVU1Hr1G072220.4 HORVU1Hr1G072220	1017.57	-7.95	-0.87	-3.53	-7.95	-1.17	-4.11	-4.41	-4.7	-3.82	-4.41	-4.11	-1.76	-2.94	-2.35	-4.41	-0.58	-3.82	-8.54	-3.82	-4.7	-3.23	-4.7	-6.18	-1.46	-9.72	-5.29	-4.7	-3.53	-1.76	-7.06	-8.54	-5.59	-3.82	-5	-2.05	-3.23	-3.23	-1.46	-4.7
	High	Unambiguous	EQVFSTYSDNQPGVLIQVYEGERTR		3.57144e-05	0.000414347	4	5	HORVU4Hr1G059260.3 HORVU4Hr1G059260; HORVU5Hr1G021300.3 HORVU5Hr1G021300; HORVU6Hr1G081460.2 HORVU6Hr1G081460	2915.42	-11.2	-3.99	-1.01																		-2.96						1.46	-5.02							-4.3
	High	Unambiguous	TLSSTAQTTIEIDSLFEGIDFYSTITR	1xDeamidated [Q7]	0.000276325	0.000693743	3	4	HORVU5Hr1G021300.3 HORVU5Hr1G021300; HORVU6Hr1G081460.2 HORVU6Hr1G081460	3010.48									5.71	-1.15			-3.15	-4.44	9.91	5.12	-2.95						-2.45					-1.05									-1.95
	High	Unambiguous	ATAGDTHLGGEDFDNRMVNHFVQEFK		0.00034028	0.000693743	6	3	HORVU5Hr1G113180.1 HORVU5Hr1G113180; HORVU4Hr1G059390.1 HORVU4Hr1G059390; HORVU3Hr1G086500.1 HORVU3Hr1G086500; HORVU5Hr1G021300.3 HORVU5Hr1G021300; HORVU6Hr1G081460.2 HORVU6Hr1G081460; HORVU1Hr1G072220.4 HORVU1Hr1G072220	2935.34	1.06	2.08	1.23	9.88															7.7					1.74				2.93			9.33
	High	Unambiguous	NVLIFDLGGGTFDVSLLTIEEGIFEVK		0.000583005	0.000693743	7	4	HORVU4Hr1G059260.3 HORVU4Hr1G059260; HORVU5Hr1G113180.1 HORVU5Hr1G113180; HORVU4Hr1G059390.1 HORVU4Hr1G059390; HORVU3Hr1G086500.1 HORVU3Hr1G086500; HORVU5Hr1G021300.3 HORVU5Hr1G021300; HORVU6Hr1G081460.2 HORVU6Hr1G081460; HORVU1Hr1G072220.4 HORVU1Hr1G072220	2925.55
	High	Unambiguous	NAVVTVPAYFNDSQR	1xDeamidated [Q/N]	0.000890478	0.00115556	7	30	HORVU4Hr1G059260.3 HORVU4Hr1G059260; HORVU5Hr1G113180.1 HORVU5Hr1G113180; HORVU4Hr1G059390.1 HORVU4Hr1G059390; HORVU3Hr1G086500.1 HORVU3Hr1G086500; HORVU5Hr1G021300.3 HORVU5Hr1G021300; HORVU6Hr1G081460.2 HORVU6Hr1G081460; HORVU1Hr1G072220.4 HORVU1Hr1G072220	1681.82		1.6	0.65	-1.01	0.89	3.39		1.49		1.01	-7.9					-9.5	1.13	-6.11	0.18	0.18	9.33	34.92	-8.97			-8.79	5.41		0.41	-7.9	2.2	-9.86					-9.86		-0.42
	High	Unambiguous	QATKDAGVIAGINVLR		0.00146134	0.00137649	4	33	HORVU5Hr1G021300.3 HORVU5Hr1G021300; HORVU6Hr1G081460.2 HORVU6Hr1G081460; HORVU5Hr1G078400.1 HORVU5Hr1G078400	1625.93		-0.73	1.12																					-2.02			-0.91	0.38				-0.73
	High	Selected	NTTIPTKKEQVFSTYSDNQPGVLIQVYEGER		0.00221608	0.00137649	6	9	HORVU4Hr1G059260.3 HORVU4Hr1G059260; HORVU4Hr1G059390.1 HORVU4Hr1G059390; HORVU5Hr1G021300.3 HORVU5Hr1G021300; HORVU6Hr1G081460.2 HORVU6Hr1G081460; HORVU1Hr1G072220.4 HORVU1Hr1G072220	3541.78		1.03	-0.21
	High	Unambiguous	EQVFSTYSDNQPGVLIQVYEGER	2xDeamidated [Q/N]	0.00212265	0.00137649	6	9	HORVU4Hr1G059260.3 HORVU4Hr1G059260; HORVU4Hr1G059390.1 HORVU4Hr1G059390; HORVU5Hr1G021300.3 HORVU5Hr1G021300; HORVU6Hr1G081460.2 HORVU6Hr1G081460; HORVU1Hr1G072220.4 HORVU1Hr1G072220	2660.24		11.92	13.16						-2.4		-3.19																	7.97					-2.74
	High	Unambiguous	EQVFSTYSDNQPGVLIQVYEGERTR	1xDeamidated [Q/N]	0.00303927	0.00137649	4	4	HORVU4Hr1G059260.3 HORVU4Hr1G059260; HORVU5Hr1G021300.3 HORVU5Hr1G021300; HORVU6Hr1G081460.2 HORVU6Hr1G081460	2916.4			4.13																					10.71
	High	Unambiguous	QFAAEEISSMVLIK		0.00422852	0.00185291	3	11	HORVU3Hr1G086500.1 HORVU3Hr1G086500; HORVU5Hr1G021300.3 HORVU5Hr1G021300; HORVU6Hr1G081460.2 HORVU6Hr1G081460	1565.82							-7.3		-8.32		-15.22	-3.47	-7.68		-9.73		-10.62					-8.07	-9.22							-17.39			-5	-8.45		-9.47	-6.28
	High	Unambiguous	TTPSYVAFTDSERLIGDAAK		0.00812661	0.00300571	3	3	HORVU5Hr1G113180.1 HORVU5Hr1G113180; HORVU5Hr1G021300.3 HORVU5Hr1G021300; HORVU6Hr1G081460.2 HORVU6Hr1G081460	2142.07		-0.14	0.28																				-2.8										-3.22	6.34
	High	Unambiguous	NTTIPTKK		0.00750954	0.00300571	14	130	HORVU4Hr1G059260.3 HORVU4Hr1G059260; HORVU5Hr1G113180.1 HORVU5Hr1G113180; HORVU4Hr1G059390.1 HORVU4Hr1G059390; HORVU3Hr1G086500.1 HORVU3Hr1G086500; HORVU3Hr1G073230.1 HORVU3Hr1G073230; HORVU5Hr1G021300.3 HORVU5Hr1G021300; HORVU4Hr1G012460.1 HORVU4Hr1G012460; HORVU4Hr1G089090.2 HORVU4Hr1G089090; HORVU6Hr1G081460.2 HORVU6Hr1G081460; HORVU1Hr1G072220.4 HORVU1Hr1G072220	902.531	1.29	-1.15	-2.48	-1.37	-2.48	-0.26	-0.92	-2.92	-1.81	-2.48	-4.69	-2.92	-5.36	-2.7	-4.25	-1.59	-2.03	-0.7	-1.37	0.63	-2.7	-1.59	-2.25	-2.25	0.18	-3.81	-0.92	-2.7	-1.59	-3.81	-0.26	0.18	-3.14	-2.7	-1.12	-4.47	-0.92	-3.14	1.29
	High	Unambiguous	MYQGAGADMEGGMDDDTPAASGGPGPK	1xDeamidated [Q3]	0.00729696	0.00300571	2	11	HORVU5Hr1G021300.3 HORVU5Hr1G021300	2584.03		9.4	6.81	7.39	5.54	7.74		7.04	9.13	5.77	7.39	7.16	6.12		8.9	8.67	7.97	10.99	6.23	9.71	10.18		7.74	11.57	9.13	7.28		5.54	7.51	6.35	7.62	5.06		4.61			4.72	5.54
	High	Unambiguous	NQVAMNPINTVFDAKR	1xOxidation [M5]	0.010299	0.00361969	4	8	HORVU5Hr1G113180.1 HORVU5Hr1G113180; HORVU4Hr1G059390.1 HORVU4Hr1G059390; HORVU5Hr1G021300.3 HORVU5Hr1G021300; HORVU6Hr1G081460.2 HORVU6Hr1G081460	1833.93		-0.35	-0.52	1.77	3.08	-0.02	0.14		-3.13				0.63		-0.35	7.01		4.56	-0.84		2.59				2.43		3.9		2.59	2.27						0.14	0.3	0.63
	High	Unambiguous	ARFEEMNMDLFR		0.0142265	0.00444017	3	4	HORVU5Hr1G021300.3 HORVU5Hr1G021300; HORVU6Hr1G081460.2 HORVU6Hr1G081460	1558.71											-9.97							-6.14					-0.93	-9.73		-8.05		-8.82									0.8
	High	Unambiguous	DISGNPR		0.0261886	0.00709161	8	129	HORVU4Hr1G059260.3 HORVU4Hr1G059260; HORVU5Hr1G113180.1 HORVU5Hr1G113180; HORVU4Hr1G059390.1 HORVU4Hr1G059390; HORVU3Hr1G086500.1 HORVU3Hr1G086500; HORVU5Hr1G021300.3 HORVU5Hr1G021300; HORVU6Hr1G081460.2 HORVU6Hr1G081460; HORVU1Hr1G072220.4 HORVU1Hr1G072220	758.379	-5.83	-1.61	-1.34	-3.72	-2.13	-5.04	-2.66	-4.77	-3.45	-5.56	-6.09	-3.19	-5.83	-6.62	-4.51	-4.77	-4.77	-4.51	-6.35	-2.13	-4.77	-5.83	-6.88	-3.98	-3.45	-5.04	-6.62	-3.98	-3.72	-2.66	-4.51	-2.66	-6.62	-2.93	-3.45	-3.98	-5.04	-2.13	-3.45
TRUE	High	Master Protein	HORVU6Hr1G081460.2 HORVU6Hr1G081460	chr6H:545779445-545783459 HC_G|Heat shock 70 kDa protein 3|none|PF00012|IPR013126, IPR018181, IPR029047, IPR029048	0	67	36	6898	3	1	647	71.1	5.19	287.85	402.21	600.33	406.59	548.48	360.75	452.09	316.63	404.28	413.51	526.69	202.69	353.43	315.37	476.04	397.49	479.38	352.52	476.82	361.8	457.42	380.42	488.58	458.04	290.13	394.29	342.52	455.69	408.66	511.01	322.39	424.28	276.57	454.33	316.5	476.89
	Confidence	PSM Ambiguity	Sequence	Modifications	Qvality PEP	Qvality q-value	# Proteins	# PSMs	Master Protein Accessions	Theo. MH+ [Da]	DeltaM [ppm] (by Search Engine): A Sequest HT	DeltaM [ppm] (by Search Engine): AA Sequest HT	DeltaM [ppm] (by Search Engine): AB Sequest HT	DeltaM [ppm] (by Search Engine): AC Sequest HT	DeltaM [ppm] (by Search Engine): AD Sequest HT	DeltaM [ppm] (by Search Engine): AE Sequest HT	DeltaM [ppm] (by Search Engine): AF Sequest HT	DeltaM [ppm] (by Search Engine): AG Sequest HT	DeltaM [ppm] (by Search Engine): AH Sequest HT	DeltaM [ppm] (by Search Engine): AI Sequest HT	DeltaM [ppm] (by Search Engine): AJ Sequest HT	DeltaM [ppm] (by Search Engine): AK Sequest HT	DeltaM [ppm] (by Search Engine): AL Sequest HT	DeltaM [ppm] (by Search Engine): AM Sequest HT	DeltaM [ppm] (by Search Engine): AN Sequest HT	DeltaM [ppm] (by Search Engine): AO Sequest HT	DeltaM [ppm] (by Search Engine): AP Sequest HT	DeltaM [ppm] (by Search Engine): AQ Sequest HT	DeltaM [ppm] (by Search Engine): AR Sequest HT	DeltaM [ppm] (by Search Engine): AS Sequest HT	DeltaM [ppm] (by Search Engine): AT Sequest HT	DeltaM [ppm] (by Search Engine): AU Sequest HT	DeltaM [ppm] (by Search Engine): AV Sequest HT	DeltaM [ppm] (by Search Engine): B Sequest HT	DeltaM [ppm] (by Search Engine): C Sequest HT	DeltaM [ppm] (by Search Engine): D Sequest HT	DeltaM [ppm] (by Search Engine): E Sequest HT	DeltaM [ppm] (by Search Engine): F Sequest HT	DeltaM [ppm] (by Search Engine): G Sequest HT	DeltaM [ppm] (by Search Engine): H Sequest HT	DeltaM [ppm] (by Search Engine): I Sequest HT	DeltaM [ppm] (by Search Engine): J Sequest HT	DeltaM [ppm] (by Search Engine): K Sequest HT	DeltaM [ppm] (by Search Engine): L Sequest HT	DeltaM [ppm] (by Search Engine): M Sequest HT	DeltaM [ppm] (by Search Engine): N Sequest HT	DeltaM [ppm] (by Search Engine): O Sequest HT	DeltaM [ppm] (by Search Engine): P Sequest HT	DeltaM [ppm] (by Search Engine): Q Sequest HT
	High	Unambiguous	TTPSYVAFTDSER		3.45081e-08	0	3	382	HORVU5Hr1G113180.1 HORVU5Hr1G113180; HORVU5Hr1G021300.3 HORVU5Hr1G021300; HORVU6Hr1G081460.2 HORVU6Hr1G081460	1473.69	0.89	-0.88	1.57	1.84	-1.42	1.3	1.02	0.75	0.62	2.38	2.25	0.35	0.07	2.25	0.89	0.07	-0.74	-0.2	3.33	1.16	2.92	-0.06	0.89	-0.6	-0.06	-1.69	-2.5	-1.69	-0.2	1.43	1.3	0.07	0.62	0.21	2.65	1.16	1.3	1.97	-0.6
	High	Unambiguous	IINEPTAAAIAYGLDKK		1.0437e-14	0	7	333	HORVU4Hr1G059260.3 HORVU4Hr1G059260; HORVU5Hr1G113180.1 HORVU5Hr1G113180; HORVU4Hr1G059390.1 HORVU4Hr1G059390; HORVU3Hr1G086500.1 HORVU3Hr1G086500; HORVU5Hr1G021300.3 HORVU5Hr1G021300; HORVU6Hr1G081460.2 HORVU6Hr1G081460; HORVU1Hr1G072220.4 HORVU1Hr1G072220	1787.99	2.95	1.77	3.45	0.43	1.1	3.28	0.77	0.6	0.1	2.28	1.77	0.6	1.77	2.61	1.44	2.95	1.94	2.78	2.44	0.77	7.31	1.77	2.28	2.28	3.95	1.27	4.12	-0.58	1.94	3.12	-0.41	1.94	2.28	2.61	-0.58	-0.91	0.93	-0.58	0.43
	High	Unambiguous	LINEPTAAAIAYGLDK		6.29505e-09	0	11	438	HORVU4Hr1G059260.3 HORVU4Hr1G059260; HORVU5Hr1G113180.1 HORVU5Hr1G113180; HORVU4Hr1G059390.1 HORVU4Hr1G059390; HORVU2Hr1G122780.2 HORVU2Hr1G122780; HORVU3Hr1G086500.1 HORVU3Hr1G086500; HORVU6Hr1G008880.1 HORVU6Hr1G008880; HORVU5Hr1G021300.3 HORVU5Hr1G021300; HORVU6Hr1G081460.2 HORVU6Hr1G081460; HORVU1Hr1G072220.4 HORVU1Hr1G072220	1659.9	-0.78	0.43	-3.91	-3.31	-1.5	-1.38	-0.9	-0.9	-0.05	-0.66	1.63	-3.19	-2.46	-1.02	0.43	0.07	0.19	-0.05	-0.05	-0.9	1.39	1.15	-0.9	-0.17	-0.42	-1.02	-0.29	-1.26	-0.17	-0.42	-0.54	-2.46	-0.66	-0.66	-0.17	-1.98	-1.14	0.07	-0.17
	High	Unambiguous	VQQLLQDFFNGKELCK		8.86823e-10	0	8	215	HORVU4Hr1G059260.3 HORVU4Hr1G059260; HORVU5Hr1G113180.1 HORVU5Hr1G113180; HORVU4Hr1G059390.1 HORVU4Hr1G059390; HORVU3Hr1G086500.1 HORVU3Hr1G086500; HORVU5Hr1G021300.3 HORVU5Hr1G021300; HORVU6Hr1G081460.2 HORVU6Hr1G081460; HORVU1Hr1G072220.4 HORVU1Hr1G072220	1909.98	-2.46	0.21	-0.1	0.52	-1.05	-0.1	-0.1	-0.1	-2.15	-1.67	-1.52	-2.77	0.52	-3.72	0.37	0.84	-0.57	-0.57	0.21	-1.05	-2.62	3.19	-0.73	-0.42	0.37	-2.15	-1.05	0.84	-0.42	-0.73	0.21	-2.77	-2.77	-2.3	-1.52	0.21	1	-1.05	-3.09
	High	Unambiguous	VQDLLLLDVTPLSLGLETAGGVMTVLIPR		2.04638e-11	0	4	329	HORVU3Hr1G086500.1 HORVU3Hr1G086500; HORVU5Hr1G021300.3 HORVU5Hr1G021300; HORVU6Hr1G081460.2 HORVU6Hr1G081460	3033.73	-0.49	-3.55	0.01	-1.57	-2.27	-1.18	0.4	0.01	0.9	0.4	-0.88	3.07	-0.88	0.21	-1.77	-2.96	2.78	-0.98	1	1	1	-1.97	0.9	-5.03	-1.67	-2.56	1.2	2.09	-5.03	-1.47	3.17	0.7	-2.17	-2.27	1.79	0.7	1.79	-2.66	4.98
	High	Unambiguous	FTDSTVQSDIKLWPFK		1.161e-07	0	2	299	HORVU5Hr1G021300.3 HORVU5Hr1G021300; HORVU6Hr1G081460.2 HORVU6Hr1G081460	1911.99	-5.62	-1.7	1.44	1.28	-0.91	-1.07	0.97	-1.23	-7.34	-1.7	-1.38	-2.48	-1.23	-0.28	-4.36	0.5	-2.95	-1.23	-0.44	-1.23	-2.79	0.66	-0.28	-1.07	-0.28	-0.75	-6.87	-0.13	-1.23	-0.91	-1.07	-1.7	-1.23	-3.27	-1.85	0.03	-1.38	-3.58	-2.79
	High	Unambiguous	EQVFSTYSDNQPGVLIQVYEGER		4.48752e-21	0	6	648	HORVU4Hr1G059260.3 HORVU4Hr1G059260; HORVU4Hr1G059390.1 HORVU4Hr1G059390; HORVU5Hr1G021300.3 HORVU5Hr1G021300; HORVU6Hr1G081460.2 HORVU6Hr1G081460; HORVU1Hr1G072220.4 HORVU1Hr1G072220	2658.27	0.09	0.43	0.77	2.35	0.66	-2.95	-0.7	0.21	-1.71	1.22	-0.13	-0.47	-1.15	1.22	1.79	1.56	-1.37	-0.13	1.11	-0.02	-2.62	-0.7	1.11	0.43	-0.7	-2.05	0.32	-0.36	0.21	0.66	0.77	0.32	-1.15	-0.81	0.09	0.54	-1.37	1.22	-1.26
	High	Unambiguous	EQVFSTYSDNQPGVLIQVYEGER	1xDeamidated [Q/N]	9.09547e-08	0	6	142	HORVU4Hr1G059260.3 HORVU4Hr1G059260; HORVU4Hr1G059390.1 HORVU4Hr1G059390; HORVU5Hr1G021300.3 HORVU5Hr1G021300; HORVU6Hr1G081460.2 HORVU6Hr1G081460; HORVU1Hr1G072220.4 HORVU1Hr1G072220	2659.25		9.52	8.99	1.78	3.13	3.47	2.23	4.15		2.23	2.23		2.79		3.7	2.79	0.88	1.67	6.63	1.78	3.7	2.57	2.91		6.96	7.11	10.12	8.24	4.15	1.78	0.31	0.76	-0.14	10.27	1.33	2.57	1.21	2	6.73
	High	Unambiguous	VVAGPGDKPMINVQYKGEEK		2.47562e-09	0	2	58	HORVU5Hr1G021300.3 HORVU5Hr1G021300; HORVU6Hr1G081460.2 HORVU6Hr1G081460	2159.12	-8.37	7.19		2.06	-0.9	0.4	2.06	1.88	0.77	0.21	0.58	-0.53	1.32	3.17	3.17	1.14	2.99		0.58	2.06	0.77	0.4	1.69	-9.9	1.69	1.51	-1.28	-0.53	3.17	1.51	0.03	-1.09	0.95	0.58	1.51	-8.51		-0.53	5.94
	High	Unambiguous	NALENYSYNMR		8.34471e-08	0	3	384	HORVU5Hr1G021300.3 HORVU5Hr1G021300; HORVU6Hr1G081460.2 HORVU6Hr1G081460	1374.61	-1.27	1.2	-0.11	0.62	-0.84	1.34	-2.44	-0.11	1.05	1.34	-0.26	-0.84	-0.4	1.49	0.76	0.18	-0.4	0.47	1.78	1.2	4.25	-0.98	0.76	1.64	0.18	0.18	-1.57	-0.11	1.05	0.18	0.47	-0.98	-0.4	-0.11	2.07	1.64	0.76	0.33	1.34
	High	Unambiguous	NAVVTVPAYFNDSQR		9.61502e-09	0	7	816	HORVU4Hr1G059260.3 HORVU4Hr1G059260; HORVU5Hr1G113180.1 HORVU5Hr1G113180; HORVU4Hr1G059390.1 HORVU4Hr1G059390; HORVU3Hr1G086500.1 HORVU3Hr1G086500; HORVU5Hr1G021300.3 HORVU5Hr1G021300; HORVU6Hr1G081460.2 HORVU6Hr1G081460; HORVU1Hr1G072220.4 HORVU1Hr1G072220	1680.83	1.75	0.14	1.39	0.5	2.1	3.18	0.14	-0.04	0.32	2.64	0.14	1.03	-1.11	2.46	0.5	1.21	0.5	0.32	2.64	1.21	6.92	0.5	1.75	-0.57	1.21	0.32	3.53	1.57	0.68	2.1	0.5	3	1.03	1.75	0.86	1.57	1.39	1.39	-0.75
	High	Unambiguous	NQVAMNPINTVFDAK		4.26403e-10	0	4	341	HORVU5Hr1G113180.1 HORVU5Hr1G113180; HORVU4Hr1G059390.1 HORVU4Hr1G059390; HORVU5Hr1G021300.3 HORVU5Hr1G021300; HORVU6Hr1G081460.2 HORVU6Hr1G081460	1661.83	0.82	1.42	-0.63	1.06	0.21	-0.03	-0.51	-0.63	0.46	0.34	0.21	0.21	-0.03	-3.03	0.21	-0.63	0.09	0.82	1.78	2.02	0.7	0.21	-0.15	2.5	-0.03	-0.15	-0.63	0.94	-1.59	0.46	0.46	0.58	0.21	-0.27	0.34	-0.27	-0.39	1.3	1.9
	High	Unambiguous	NQVAMNPINTVFDAKR		6.82277e-12	0	4	203	HORVU5Hr1G113180.1 HORVU5Hr1G113180; HORVU4Hr1G059390.1 HORVU4Hr1G059390; HORVU5Hr1G021300.3 HORVU5Hr1G021300; HORVU6Hr1G081460.2 HORVU6Hr1G081460	1817.93	1.85	1.36	1.36	2.02	1.36	0.37	0.2	2.35	2.18	1.19	1.52	0.04	0.04	0.86	0.04	1.03	2.84	1.69	0.86	1.19	2.18	2.02	1.69	2.35	2.18	0.86	1.36	0.2	-1.61	1.19	1.19	2.51	1.69	1.52	-0.46	0.04	0.2	2.02	2.02
	High	Unambiguous	MYQGAGADMEGGMDDDTPAASGGAGPK		4.91485e-07	0	1	15	HORVU6Hr1G081460.2 HORVU6Hr1G081460	2557.03							0.65				1.47						1.71		0.3		3.59	0.42	0.3			0.89				0.77						-2.75		-3.1
	High	Unambiguous	MYQGAGADMEGGMDDDTPAASGGAGPKIEEVD		1.08631e-08	0	1	6	HORVU6Hr1G081460.2 HORVU6Hr1G081460	3142.29			-0.71						4.06															4.16				5.59
	High	Unambiguous	ATAGDTHLGGEDFDNR		5.78633e-08	0	6	417	HORVU5Hr1G113180.1 HORVU5Hr1G113180; HORVU4Hr1G059390.1 HORVU4Hr1G059390; HORVU3Hr1G086500.1 HORVU3Hr1G086500; HORVU5Hr1G021300.3 HORVU5Hr1G021300; HORVU6Hr1G081460.2 HORVU6Hr1G081460; HORVU1Hr1G072220.4 HORVU1Hr1G072220	1675.73	3.93	3.03	0.35	2.49	0.88	1.24	1.24	2.49	2.49	-0.01	2.67	1.24	0.7	0.53	1.06	2.49	-0.01	0.17	2.32	1.06	3.03	1.6	1.96	0.88	1.96	1.96	0.7	1.78	2.67	0.88	2.14	-0.37	1.96	1.42	1.6	-0.55	1.6	-0.37	1.96
	High	Unambiguous	TLSSTAQTTIEIDSLFEGIDFYSTITR		9.5429e-13	0	3	128	HORVU5Hr1G021300.3 HORVU5Hr1G021300; HORVU6Hr1G081460.2 HORVU6Hr1G081460	3009.49		-0.86	0.65		-1.65		4.04			-0.15	-1.45	-1.55	-1.55	1.94	-1.75		4.63		-2.24		-1.35	-1.25	0.25	-4.04		0.15	1.14	0.35	2.14	0.05		1.64	1.14	-0.75				-1.95	0.65
	High	Selected	SINPDEAVAYGAAVQAAILSGEGNEK		9.03794e-19	0	6	128	HORVU5Hr1G113180.1 HORVU5Hr1G113180; HORVU3Hr1G086500.1 HORVU3Hr1G086500; HORVU5Hr1G021300.3 HORVU5Hr1G021300; HORVU6Hr1G081460.2 HORVU6Hr1G081460; HORVU1Hr1G072220.4 HORVU1Hr1G072220	2574.27	3.48			-0.02	1.96	-0.14	0.91	1.06	1.38	1.03	0.21	4.71	0.21	0.33	1.26	1.26	0.91	0.21	0.91	1.21	-1.42	1.49	1.26	0.91	0.33	1.84	1.38	1.73	1.49	-0.49	0.56	0.21		2.08	-0.25	1.14	-0.11	0.21	-3.29
	High	Unambiguous	FTDSTVQSDIK		3.41444e-06	0.000341594	2	82	HORVU5Hr1G021300.3 HORVU5Hr1G021300; HORVU6Hr1G081460.2 HORVU6Hr1G081460	1240.61				1.09	-0.85	-0.52	-1.17	0.93	-0.85	1.25	0.93			1.57	2.22	1.25	-1.17	-1.01	1.25	-0.04	1.09	-1.01	-0.52		2.22	-1.01			-0.36	-0.36	0.61	-1.17	-1.17	-0.85	-0.68	0.12	-0.68	-2.3
	High	Unambiguous	DAGVIAGINVLR		1.1466e-06	0.000341594	5	477	HORVU5Hr1G021300.3 HORVU5Hr1G021300; HORVU6Hr1G081460.2 HORVU6Hr1G081460; HORVU2Hr1G112630.2 HORVU2Hr1G112630; HORVU5Hr1G078400.1 HORVU5Hr1G078400	1197.69	-1.9	0.27	-0.56	-2.73	-0.06	-0.9	0.77	1.61	0.27	-0.9	-1.06	-2.07	-0.9	-2.07	-0.9	-2.57	1.61	0.77	-0.73	-0.06	1.44	-0.06	-0.56	-1.06	2.94	-1.23			-1.9	-0.4	0.61	-1.4	0.11	-1.56	-0.4	-3.07	-0.56	1.61	0.77
	High	Unambiguous	VQQLLQDFFNGK		2.50757e-06	0.000341594	9	58	HORVU4Hr1G059260.3 HORVU4Hr1G059260; HORVU5Hr1G113180.1 HORVU5Hr1G113180; HORVU4Hr1G059390.1 HORVU4Hr1G059390; HORVU3Hr1G086500.1 HORVU3Hr1G086500; HORVU5Hr1G021300.3 HORVU5Hr1G021300; HORVU6Hr1G081460.2 HORVU6Hr1G081460; HORVU1Hr1G072220.4 HORVU1Hr1G072220	1436.75				-0.92	-0.5	-2.17	-1.75			-1.89	-2.17		-1.89	-0.22	-1.89	0.06	-1.75	-0.92	-1.06			-1.47	-2.45		-1.75	-2.45	-3		-2.45	-2.31			-2.45	-2.45	-2.87	-2.45	-2.45	-2.31
	High	Unambiguous	VEIIANDQGNR		3.00619e-05	0.000414347	12	112	HORVU5Hr1G113180.1 HORVU5Hr1G113180; HORVU4Hr1G059390.1 HORVU4Hr1G059390; HORVU2Hr1G122780.2 HORVU2Hr1G122780; HORVU3Hr1G086500.1 HORVU3Hr1G086500; HORVU6Hr1G008880.1 HORVU6Hr1G008880; HORVU5Hr1G021300.3 HORVU5Hr1G021300; HORVU6Hr1G081460.2 HORVU6Hr1G081460; HORVU1Hr1G072220.4 HORVU1Hr1G072220; HORVU5Hr1G078400.1 HORVU5Hr1G078400	1228.63	1.37	2.35	-4	-0.09	-3.02	0.07	-1.56	-0.75	0.23	0.72	-1.72	1.7	-0.09	-0.91	-0.75	-0.09	-1.72	-4.65	-3.02	-0.58	-0.42	-0.09	1.86		0.39	-0.26	-5.63	-2.37	0.56	-2.21	1.53	-3.19	0.88	-0.26	4.14	-1.07	-0.75	-3.84	2.51
	High	Unambiguous	MDKSTVHDVVLVGGSTR		7.10128e-06	0.000414347	6	110	HORVU4Hr1G059390.1 HORVU4Hr1G059390; HORVU3Hr1G086500.1 HORVU3Hr1G086500; HORVU5Hr1G021300.3 HORVU5Hr1G021300; HORVU6Hr1G081460.2 HORVU6Hr1G081460; HORVU1Hr1G072220.4 HORVU1Hr1G072220	1800.93	0.51	1.84	2.28	1.17	1.4	1.16	2.06	1.62	2.73	1.4	1.17	-0.83		0.51	2.28	1.17	2.28	3.39	-0.16	1.4	2.51	0.51	0.95	2.06	1.17		1.62	0.73	2.73	0.51	0.95	0.95		2.73	3.62	0.95	2.51	1.84	3.62
	High	Unambiguous	MVNHFVQEFK		9.95116e-06	0.000414347	8	264	HORVU4Hr1G059260.3 HORVU4Hr1G059260; HORVU5Hr1G113180.1 HORVU5Hr1G113180; HORVU4Hr1G059390.1 HORVU4Hr1G059390; HORVU3Hr1G086500.1 HORVU3Hr1G086500; HORVU5Hr1G021300.3 HORVU5Hr1G021300; HORVU6Hr1G081460.2 HORVU6Hr1G081460; HORVU1Hr1G072220.4 HORVU1Hr1G072220	1278.63	0.23	-0.01	1.17	2.34	1.64	0.93	1.87	4.22	0.93	0.46	0.46	0.93	0.46	2.11	2.11	-0.24	2.34	0.7	2.81	3.75	1.4	0.23	2.81	1.17	-1.18	1.17	0.23	-0.01	0.7	3.28	3.51	-0.01	0.46	1.17	1.87	1.17	1.4	2.81	1.64
	High	Unambiguous	STVHDVVLVGGSTR		1.09246e-05	0.000414347	6	207	HORVU4Hr1G059390.1 HORVU4Hr1G059390; HORVU3Hr1G086500.1 HORVU3Hr1G086500; HORVU5Hr1G021300.3 HORVU5Hr1G021300; HORVU6Hr1G081460.2 HORVU6Hr1G081460; HORVU1Hr1G072220.4 HORVU1Hr1G072220	1426.76	-1.49	-0.43	0.41	-0.86	-0.43	0.41	0.2	-0.86	-0.65	0.62	-0.43	-2.33	-2.54	-1.49	2.51	1.46	-0.22	-0.22	0.83	-0.43	-0.86	1.25	0.41	0.41	1.46	0.2	0.41	-0.43	3.35	-0.22	-1.7	-2.12	-2.12	-1.07	-0.01	-2.96	0.41	-0.65	0.83
	High	Unambiguous	VQQLLQDFFNGKELCK	1xDeamidated [Q/N]	9.60029e-06	0.000414347	8	81	HORVU4Hr1G059260.3 HORVU4Hr1G059260; HORVU5Hr1G113180.1 HORVU5Hr1G113180; HORVU4Hr1G059390.1 HORVU4Hr1G059390; HORVU3Hr1G086500.1 HORVU3Hr1G086500; HORVU5Hr1G021300.3 HORVU5Hr1G021300; HORVU6Hr1G081460.2 HORVU6Hr1G081460; HORVU1Hr1G072220.4 HORVU1Hr1G072220	1910.97	0.52	-1.84	-0.74	-2.47	-4.04	1.14	0.99	-2.15	-4.35	-1.21	-3.72	-0.11	-0.74	-0.9	-1.37	0.83	-0.9	-2	0.2	-1.05	-2.62	1.14	-0.27	-2.47	-0.11	-1.84	-0.9	-1.37	-0.58	-2.47	-2.62	-0.11	-4.98	-4.19	-2.62	-3.09	0.52	-2.94	-1.21
	High	Unambiguous	VQDLLLLDVTPLSLGLETAGGVMTVLIPR	1xDeamidated [Q2]	0.000131912	0.000414347	4	14	HORVU3Hr1G086500.1 HORVU3Hr1G086500; HORVU5Hr1G021300.3 HORVU5Hr1G021300; HORVU6Hr1G081460.2 HORVU6Hr1G081460	3034.71		11.36	6.43	8.13		10.57	4.65	16.02	8.53		3.86	0.7	2.08	9.59	5.74	7.02	5.14	5.63	5.54	5.89	5.43	3.46	8.21	13.15			8.9	6.92	7.32		16.22	4.25			2.77	6.42	8.13	1.88
	High	Selected	SINPDEAVAYGAAVQAAILSGEGNEK	1xDeamidated [Q15]	1.49827e-05	0.000414347	6	4	HORVU5Hr1G113180.1 HORVU5Hr1G113180; HORVU3Hr1G086500.1 HORVU3Hr1G086500; HORVU5Hr1G021300.3 HORVU5Hr1G021300; HORVU6Hr1G081460.2 HORVU6Hr1G081460; HORVU1Hr1G072220.4 HORVU1Hr1G072220	2575.25				1.69	-1.89	3.24	1.72				-2.01	2.47				2.19	4.49		4.62	4.18	7.19						8.89		8.83			8.58	7.28	6.04		8.27		4.95
	High	Unambiguous	ITITNDKGR		9.08154e-05	0.000414347	8	327	HORVU4Hr1G059260.3 HORVU4Hr1G059260; HORVU5Hr1G113180.1 HORVU5Hr1G113180; HORVU4Hr1G059390.1 HORVU4Hr1G059390; HORVU3Hr1G086500.1 HORVU3Hr1G086500; HORVU5Hr1G021300.3 HORVU5Hr1G021300; HORVU6Hr1G081460.2 HORVU6Hr1G081460; HORVU1Hr1G072220.4 HORVU1Hr1G072220	1017.57	-7.95	-0.87	-3.53	-7.95	-1.17	-4.11	-4.41	-4.7	-3.82	-4.41	-4.11	-1.76	-2.94	-2.35	-4.41	-0.58	-3.82	-8.54	-3.82	-4.7	-3.23	-4.7	-6.18	-1.46	-9.72	-5.29	-4.7	-3.53	-1.76	-7.06	-8.54	-5.59	-3.82	-5	-2.05	-3.23	-3.23	-1.46	-4.7
	High	Unambiguous	EQVFSTYSDNQPGVLIQVYEGERTR		3.57144e-05	0.000414347	4	5	HORVU4Hr1G059260.3 HORVU4Hr1G059260; HORVU5Hr1G021300.3 HORVU5Hr1G021300; HORVU6Hr1G081460.2 HORVU6Hr1G081460	2915.42	-11.2	-3.99	-1.01																		-2.96						1.46	-5.02							-4.3
	High	Unambiguous	TLSSTAQTTIEIDSLFEGIDFYSTITR	1xDeamidated [Q7]	0.000276325	0.000693743	3	4	HORVU5Hr1G021300.3 HORVU5Hr1G021300; HORVU6Hr1G081460.2 HORVU6Hr1G081460	3010.48									5.71	-1.15			-3.15	-4.44	9.91	5.12	-2.95						-2.45					-1.05									-1.95
	High	Unambiguous	ATAGDTHLGGEDFDNRMVNHFVQEFK		0.00034028	0.000693743	6	3	HORVU5Hr1G113180.1 HORVU5Hr1G113180; HORVU4Hr1G059390.1 HORVU4Hr1G059390; HORVU3Hr1G086500.1 HORVU3Hr1G086500; HORVU5Hr1G021300.3 HORVU5Hr1G021300; HORVU6Hr1G081460.2 HORVU6Hr1G081460; HORVU1Hr1G072220.4 HORVU1Hr1G072220	2935.34	1.06	2.08	1.23	9.88															7.7					1.74				2.93			9.33
	High	Unambiguous	NVLIFDLGGGTFDVSLLTIEEGIFEVK		0.000583005	0.000693743	7	4	HORVU4Hr1G059260.3 HORVU4Hr1G059260; HORVU5Hr1G113180.1 HORVU5Hr1G113180; HORVU4Hr1G059390.1 HORVU4Hr1G059390; HORVU3Hr1G086500.1 HORVU3Hr1G086500; HORVU5Hr1G021300.3 HORVU5Hr1G021300; HORVU6Hr1G081460.2 HORVU6Hr1G081460; HORVU1Hr1G072220.4 HORVU1Hr1G072220	2925.55
	High	Unambiguous	NAVVTVPAYFNDSQR	1xDeamidated [Q/N]	0.000890478	0.00115556	7	30	HORVU4Hr1G059260.3 HORVU4Hr1G059260; HORVU5Hr1G113180.1 HORVU5Hr1G113180; HORVU4Hr1G059390.1 HORVU4Hr1G059390; HORVU3Hr1G086500.1 HORVU3Hr1G086500; HORVU5Hr1G021300.3 HORVU5Hr1G021300; HORVU6Hr1G081460.2 HORVU6Hr1G081460; HORVU1Hr1G072220.4 HORVU1Hr1G072220	1681.82		1.6	0.65	-1.01	0.89	3.39		1.49		1.01	-7.9					-9.5	1.13	-6.11	0.18	0.18	9.33	34.92	-8.97			-8.79	5.41		0.41	-7.9	2.2	-9.86					-9.86		-0.42
	High	Unambiguous	QATKDAGVIAGINVLR		0.00146134	0.00137649	4	33	HORVU5Hr1G021300.3 HORVU5Hr1G021300; HORVU6Hr1G081460.2 HORVU6Hr1G081460; HORVU5Hr1G078400.1 HORVU5Hr1G078400	1625.93		-0.73	1.12																					-2.02			-0.91	0.38				-0.73
	High	Selected	NTTIPTKKEQVFSTYSDNQPGVLIQVYEGER		0.00221608	0.00137649	6	9	HORVU4Hr1G059260.3 HORVU4Hr1G059260; HORVU4Hr1G059390.1 HORVU4Hr1G059390; HORVU5Hr1G021300.3 HORVU5Hr1G021300; HORVU6Hr1G081460.2 HORVU6Hr1G081460; HORVU1Hr1G072220.4 HORVU1Hr1G072220	3541.78		1.03	-0.21
	High	Unambiguous	EQVFSTYSDNQPGVLIQVYEGER	2xDeamidated [Q/N]	0.00212265	0.00137649	6	9	HORVU4Hr1G059260.3 HORVU4Hr1G059260; HORVU4Hr1G059390.1 HORVU4Hr1G059390; HORVU5Hr1G021300.3 HORVU5Hr1G021300; HORVU6Hr1G081460.2 HORVU6Hr1G081460; HORVU1Hr1G072220.4 HORVU1Hr1G072220	2660.24		11.92	13.16						-2.4		-3.19																	7.97					-2.74
	High	Unambiguous	EQVFSTYSDNQPGVLIQVYEGERTR	1xDeamidated [Q/N]	0.00303927	0.00137649	4	4	HORVU4Hr1G059260.3 HORVU4Hr1G059260; HORVU5Hr1G021300.3 HORVU5Hr1G021300; HORVU6Hr1G081460.2 HORVU6Hr1G081460	2916.4			4.13																					10.71
	High	Unambiguous	MREIAEAFLGTTVK		0.00317304	0.00137649	1	15	HORVU6Hr1G081460.2 HORVU6Hr1G081460	1565.84	-2.13		-2.13								-2.9							-0.41	-1.37					-2.13			-2.13	-1.37
	High	Unambiguous	MYQGAGADMEGGMDDDTPAASGGAGPKIEEVD	1xDeamidated [Q3]	0.00315034	0.00137649	1	19	HORVU6Hr1G081460.2 HORVU6Hr1G081460	3143.28	10.55	9.59	6.35	11.21	9.78	8.92	4.63	8.92	6.25	7.59	6.92	8.92	6.73		-7.11	-3.29	5.77		10.64	9.97	14.65	9.5		11.69	9.21	9.3		-6.16	9.97	12.36		7.59	9.3	6.15	6.44	3.39		6.73
	High	Unambiguous	MYQGAGADMEGGMDDDTPAASGGAGPK	1xDeamidated [Q3]	0.00243286	0.00137649	1	21	HORVU6Hr1G081460.2 HORVU6Hr1G081460	2558.01			7.57	10.61	5.22	8.74		7.92	12.37	9.44		10.5		5.22	7.68	10.61	6.98	10.38	6.63	8.27	6.98	7.21	9.09	11.79	8.97	8.86	9.32	6.04	7.92	7.45	7.68	8.5		8.97	9.09	7.92	10.38	5.69
	High	Unambiguous	QFAAEEISSMVLIK		0.00422852	0.00185291	3	11	HORVU3Hr1G086500.1 HORVU3Hr1G086500; HORVU5Hr1G021300.3 HORVU5Hr1G021300; HORVU6Hr1G081460.2 HORVU6Hr1G081460	1565.82							-7.3		-8.32		-15.22	-3.47	-7.68		-9.73		-10.62					-8.07	-9.22							-17.39			-5	-8.45		-9.47	-6.28
	High	Unambiguous	TTPSYVAFTDSERLIGDAAK		0.00812661	0.00300571	3	3	HORVU5Hr1G113180.1 HORVU5Hr1G113180; HORVU5Hr1G021300.3 HORVU5Hr1G021300; HORVU6Hr1G081460.2 HORVU6Hr1G081460	2142.07		-0.14	0.28																				-2.8										-3.22	6.34
	High	Unambiguous	NTTIPTKK		0.00750954	0.00300571	14	130	HORVU4Hr1G059260.3 HORVU4Hr1G059260; HORVU5Hr1G113180.1 HORVU5Hr1G113180; HORVU4Hr1G059390.1 HORVU4Hr1G059390; HORVU3Hr1G086500.1 HORVU3Hr1G086500; HORVU3Hr1G073230.1 HORVU3Hr1G073230; HORVU5Hr1G021300.3 HORVU5Hr1G021300; HORVU4Hr1G012460.1 HORVU4Hr1G012460; HORVU4Hr1G089090.2 HORVU4Hr1G089090; HORVU6Hr1G081460.2 HORVU6Hr1G081460; HORVU1Hr1G072220.4 HORVU1Hr1G072220	902.531	1.29	-1.15	-2.48	-1.37	-2.48	-0.26	-0.92	-2.92	-1.81	-2.48	-4.69	-2.92	-5.36	-2.7	-4.25	-1.59	-2.03	-0.7	-1.37	0.63	-2.7	-1.59	-2.25	-2.25	0.18	-3.81	-0.92	-2.7	-1.59	-3.81	-0.26	0.18	-3.14	-2.7	-1.12	-4.47	-0.92	-3.14	1.29
	High	Unambiguous	NQVAMNPINTVFDAKR	1xOxidation [M5]	0.010299	0.00361969	4	8	HORVU5Hr1G113180.1 HORVU5Hr1G113180; HORVU4Hr1G059390.1 HORVU4Hr1G059390; HORVU5Hr1G021300.3 HORVU5Hr1G021300; HORVU6Hr1G081460.2 HORVU6Hr1G081460	1833.93		-0.35	-0.52	1.77	3.08	-0.02	0.14		-3.13				0.63		-0.35	7.01		4.56	-0.84		2.59				2.43		3.9		2.59	2.27						0.14	0.3	0.63
	High	Unambiguous	ARFEEMNMDLFR		0.0142265	0.00444017	3	4	HORVU5Hr1G021300.3 HORVU5Hr1G021300; HORVU6Hr1G081460.2 HORVU6Hr1G081460	1558.71											-9.97							-6.14					-0.93	-9.73		-8.05		-8.82									0.8
	High	Unambiguous	DISGNPR		0.0261886	0.00709161	8	129	HORVU4Hr1G059260.3 HORVU4Hr1G059260; HORVU5Hr1G113180.1 HORVU5Hr1G113180; HORVU4Hr1G059390.1 HORVU4Hr1G059390; HORVU3Hr1G086500.1 HORVU3Hr1G086500; HORVU5Hr1G021300.3 HORVU5Hr1G021300; HORVU6Hr1G081460.2 HORVU6Hr1G081460; HORVU1Hr1G072220.4 HORVU1Hr1G072220	758.379	-5.83	-1.61	-1.34	-3.72	-2.13	-5.04	-2.66	-4.77	-3.45	-5.56	-6.09	-3.19	-5.83	-6.62	-4.51	-4.77	-4.77	-4.51	-6.35	-2.13	-4.77	-5.83	-6.88	-3.98	-3.45	-5.04	-6.62	-3.98	-3.72	-2.66	-4.51	-2.66	-6.62	-2.93	-3.45	-3.98	-5.04	-2.13	-3.45
TRUE	High	Master Protein	HORVU3Hr1G080530.5 HORVU3Hr1G080530	chr3H:589362811-589366548 HC_G|Phosphoglycerate mutase, 2,3-bisphosphoglycerate-independent|GO:0003824, GO:0004619, GO:0005737, GO:0006007, GO:0008152, GO:0030145, GO:0046872|PF01676, PF06415|IPR005995, IPR006124, IPR011258, IPR017849, IPR017850	0	85	41	8716	39	1	564	61.5	5.78	353.71	341.92	563.54	429.52	675.32	459.16	584.97	415.91	645.68	529.81	707.88	301.1	517.37	390.31	587.32	414.59	479.19	461.55	667.91	468.76	595.73	398.15	556.85	506.3	405.01	549.91	364.5	543.97	502.84	758.82	607.64	810.44	438.79	615.44	443.37	722.11
	Confidence	PSM Ambiguity	Sequence	Modifications	Qvality PEP	Qvality q-value	# Proteins	# PSMs	Master Protein Accessions	Theo. MH+ [Da]	DeltaM [ppm] (by Search Engine): A Sequest HT	DeltaM [ppm] (by Search Engine): AA Sequest HT	DeltaM [ppm] (by Search Engine): AB Sequest HT	DeltaM [ppm] (by Search Engine): AC Sequest HT	DeltaM [ppm] (by Search Engine): AD Sequest HT	DeltaM [ppm] (by Search Engine): AE Sequest HT	DeltaM [ppm] (by Search Engine): AF Sequest HT	DeltaM [ppm] (by Search Engine): AG Sequest HT	DeltaM [ppm] (by Search Engine): AH Sequest HT	DeltaM [ppm] (by Search Engine): AI Sequest HT	DeltaM [ppm] (by Search Engine): AJ Sequest HT	DeltaM [ppm] (by Search Engine): AK Sequest HT	DeltaM [ppm] (by Search Engine): AL Sequest HT	DeltaM [ppm] (by Search Engine): AM Sequest HT	DeltaM [ppm] (by Search Engine): AN Sequest HT	DeltaM [ppm] (by Search Engine): AO Sequest HT	DeltaM [ppm] (by Search Engine): AP Sequest HT	DeltaM [ppm] (by Search Engine): AQ Sequest HT	DeltaM [ppm] (by Search Engine): AR Sequest HT	DeltaM [ppm] (by Search Engine): AS Sequest HT	DeltaM [ppm] (by Search Engine): AT Sequest HT	DeltaM [ppm] (by Search Engine): AU Sequest HT	DeltaM [ppm] (by Search Engine): AV Sequest HT	DeltaM [ppm] (by Search Engine): B Sequest HT	DeltaM [ppm] (by Search Engine): C Sequest HT	DeltaM [ppm] (by Search Engine): D Sequest HT	DeltaM [ppm] (by Search Engine): E Sequest HT	DeltaM [ppm] (by Search Engine): F Sequest HT	DeltaM [ppm] (by Search Engine): G Sequest HT	DeltaM [ppm] (by Search Engine): H Sequest HT	DeltaM [ppm] (by Search Engine): I Sequest HT	DeltaM [ppm] (by Search Engine): J Sequest HT	DeltaM [ppm] (by Search Engine): K Sequest HT	DeltaM [ppm] (by Search Engine): L Sequest HT	DeltaM [ppm] (by Search Engine): M Sequest HT	DeltaM [ppm] (by Search Engine): N Sequest HT	DeltaM [ppm] (by Search Engine): O Sequest HT	DeltaM [ppm] (by Search Engine): P Sequest HT	DeltaM [ppm] (by Search Engine): Q Sequest HT
	High	Unambiguous	YAGMLQYDGELKLPSK		3.19479e-07	0	1	264	HORVU3Hr1G080530.5 HORVU3Hr1G080530	1812.92	0.5	1.32	-0.17	0.17	1.32	0	0.66	2.81	0.99	0.66	0.5	0.99	-0.33	0.17	-0.5	0.17	-0.17	1.49	0.66	1.32	2.98	1.49	0.33	0.99	3.31	-1.16	2.65	-0.17	0	1.65	-0.17	2.48	1.99	0.66	0.17	-0.99	0.17	1.82	1.16
	High	Unambiguous	FRSDIQTPGLANVAATVMNLHGFQAPADYETTLIEVVDK	1xDeamidated [Q/N]	5.65239e-09	0	1	461	HORVU3Hr1G080530.5 HORVU3Hr1G080530	4233.12	4.19	4.38	4.47	0.15	3.71	3.62	2.86	3.15	4.56	2.77	2.39	5.7	3.05	6.45	6.93	2.39	5.41	4.38	0.5	3.81	6.53	2.01	2.77	5.23	8.63	3.34	2.58	5.6	4.29	6.64	2.39	4.47	2.58	2.87	1.69	3.22	2.11	1.92	5.41
	High	Unambiguous	FRSDIQTPGLANVAATVMNLHGFQAPADYETTLIEVVDK		7.56442e-25	0	1	1219	HORVU3Hr1G080530.5 HORVU3Hr1G080530	4232.13	0.6	-0.72	2.21	-0.25	0.6	1.83	0.5	0.79	0.41	0.13	-0.06	1.54	0.03	0.22	2.11	-1.2	-0.35	0.32	-0.91	0.79	0.88	1.26	0.13	-0.35	0.41	0.41	0.22	0.22	-1.67	0.32	-0.82	0.32	0.69	0.6	0.41	0.03	0.22	-2.14	0.98
	High	Unambiguous	AHGTAVGLPSDDDMGNSEVGHNALGAGR		1.60866e-13	0	1	359	HORVU3Hr1G080530.5 HORVU3Hr1G080530	2705.23	1.68	-0.69	1.68	1.38	0.94	3.01	1.97	1.83	1.53	2.71	3.31	1.68	1.24	2.42	1.97	1.53	1.24	0.2	4.49	2.57	2.42	-0.24	2.42	1.97	-0.69	0.94	-0.24	1.53	0.79	3.01	3.01	1.24	1.24	1.38	2.12	1.53	1.97	2.12	0.79
	High	Unambiguous	SGYFDETKEEYVEIPSDSGITFNEQPK		1.12601e-08	0	1	27	HORVU3Hr1G080530.5 HORVU3Hr1G080530	3109.42						1.42	0.35					3.44	3.73				8.94						3.54				12.41					5.18	5.18	10.72		1.42		7.01	9.33
	High	Unambiguous	ALEFPDFDKFDR		2.21531e-07	0	1	181	HORVU3Hr1G080530.5 HORVU3Hr1G080530	1499.72	1.55	0.15	0.15	2.35	2.55	-0.45	0.75	0.95	-0.85	2.75	0.15	1.15	-0.25	-0.65	0.95	2.15	0.55	0.15	3.35	1.95	-1.05	-0.25	0.95	0.75	0.75	-0.25	2.15	0.15	-1.05	0.95	1.15	0.55	0.55	-0.45	0.75	1.55	0.15	0.55	1.15
	High	Unambiguous	SVGPIVDGDAVVTFNFR		2.1681e-07	0	1	265	HORVU3Hr1G080530.5 HORVU3Hr1G080530	1792.92	-6.12	-1.44	-2.27	1.91	-0.1	2.08	0.74	-0.6	-3.28	0.4	-1.77	0.4	-0.77	-0.1	-0.94	1.07	-1.1	-1.27	1.07	0.4	-1.94	-2.27	-0.6	-1.1	-0.1	-0.43	-0.28	0.57	-1.27	-1.1	-0.94	-0.94	-0.17	-2.44	-0.28	-1.6	0.5	-1.1	-1.28
	High	Unambiguous	SGSIQILTSHTLQPVPVAIGGPGLHPGVR		1.06605e-18	0	1	357	HORVU3Hr1G080530.5 HORVU3Hr1G080530	2888.61	1.28	-1.36	1.28	1.41	1.28	1.28	-0.25	1	-0.11	1.97	-0.52	1.69	2.11	0.17	2.38	3.08	1.28	-0.52	0.72	0.17	-1.49	0.58	0.58	-1.49	-1.22	1	1.97	-0.52	1.28	0.31	2.11	0.31	0.17	-1.22	1.97	1.41	0.03	1.83	-0.94
	High	Unambiguous	SDIQTPGLANVAATVMNLHGFQAPADYETTLIEVVDK		3.98972e-11	0	1	197	HORVU3Hr1G080530.5 HORVU3Hr1G080530	3928.96	-0.8		0.42	-3.14	2.15	0.22	0.63	3.78	2.26	4.09	-2.12	0.73	-0.39	-0.49	-0.8	0.83	0.73	3.17	-0.7	-3.04	1.75	-0.39	-1.41	1.24	5	0.22	-2.63	-0.9	0.22	1.34	-0.8	-1.21	-1.92	0.63	2.36	1.24	-0.37	-1.1	2.3
	High	Unambiguous	ANDQYLPPFVIVDESGKSVGPIVDGDAVVTFNFR		4.20177e-14	0	1	317	HORVU3Hr1G080530.5 HORVU3Hr1G080530	3665.85	-0.23	0.54	1.3		0.75	-0.88	-0.01	1.52	1.41	1.63	0.86	2.5	0.65	1.85	-0.01	7.3	0.32	-4.16	0.54	0.21	1.08	2.17	0.65	0.65	-0.01	-0.23	2.61	2.17	2.28	-0.23	-2.95	1.41	-2.63	0.43	-1.32	2.06	-4.59	0.1	-1.75
	High	Unambiguous	ANDQYLPPFVIVDESGK		5.45309e-09	0	1	336	HORVU3Hr1G080530.5 HORVU3Hr1G080530	1891.94	1.53	1.32	-1	0.69	-1.11	-0.05	-0.79	0.48	-1.32	0.16	-0.37	0.79	0.27	0.9	2.06	1.32	-1.42	-1.64	0.58	-0.16	-0.79	-0.37	0.33	0.81	-0.16	-1.74	-0.47	-0.37	-0.16	-2.05	-0.79	0.27	-1.11	0.37	-1.32	-0.05	0.16	-1	-1.64
	High	Unambiguous	MVLDAVEQVGGIYLVTADHGNAEDMVKR		8.42769e-18	0	1	463	HORVU3Hr1G080530.5 HORVU3Hr1G080530	3030.5	1.54	-0.05	1.54	0.48	-0.97	0.08	0.61	2.86	0.88	0.22	-0.97	3.78	2.2	-1.1	-0.05	0.88	-0.97	-0.84	0.61	0.35	-1.1	-0.05	0.74	0.48	1.01	0.48	1.4	-0.71	0.48	-1.5	0.88	0.48	-1.37	1.4	0.48	-1.1	0.74	-1.76	-0.71
	High	Unambiguous	LDQVQLIVK		3.48878e-06	0.000341594	1	249	HORVU3Hr1G080530.5 HORVU3Hr1G080530	1055.65	0.38	-1.89	-3.03	1.14	0.95	1.14	-2.27	-0.19	-2.08	-0.57	0.38	-1.51	-0.95	-2.46	0.19	-3.6	0.38	-0.57	-1.7	-2.84	0.19	1.33	-4.92	-0.38	-1.7	-1.89	-0.95	-1.14	-9.66	-0.57	1.52	-16.67	-1.14	0.38	-2.84	-1.32	-3.79	-1.14	-5.49
	High	Unambiguous	AGQPMLDKSGSIQILTSHTLQPVPVAIGGPGLHPGVR		1.88166e-06	0.000341594	1	70	HORVU3Hr1G080530.5 HORVU3Hr1G080530	3729.03	2.83	1.08	3.9	0.68		1.89		3.09	4.84	1.89		4.3				7.25		1.48	1.75	2.02	0.41	2.56		-3.98	-5.75	-25.07	-5.59	-4.46	4.97	4.17	-0.12	2.96	1.75		2.15	3.5	2.42	0.55	0.14
	High	Unambiguous	DVLDGSSVGFVETIEKDLAQLR		1.3622e-06	0.000341594	1	167	HORVU3Hr1G080530.5 HORVU3Hr1G080530	2391.24				0.02	1.15	-1.86	-1.36	-1.73	-2.24	0.15	0.15	-4.24	-3.87	2.53	-2.24	-0.98	0.02	-3.74	-4.12	-2.11	-4.24	-4.49	-2.49	-9.14	-5.12	-1.48	0.9		0.27	-2.61	-1.73	-0.48	-1.23	0.4	-1.23	0.27	-0.73	-2.86	-0.61
	High	Unambiguous	MYVTMDRYENDWSVVK		8.55854e-06	0.000414347	1	202	HORVU3Hr1G080530.5 HORVU3Hr1G080530	2035.93	0.95	2.57	0.51	0.8	0.66	-0.37	-1.26	4.49	0.8	0.22	0.51	1.1	0.22	0.95	0.95	-0.52	0.51	1.25	1.54	-0.08	3.75	1.98	-0.67	3.6	1.98	0.07	3.6	0.36	-0.08	2.13	-0.52	1.54	0.95	0.51	-0.96	-0.23	-0.23	1.54	1.25
	High	Selected	IWEDEGFNYIKESFDKGTLHLIGLLSDGGVHSR		3.89276e-05	0.000414347	1	283	HORVU3Hr1G080530.5 HORVU3Hr1G080530	3732.87	2.13	1.17	4.06	0.37	2.13	2.46	1.97	2.3	-1.24	2.78	0.53	5.03	1.97	1.49	2.62	1.17	3.42	1.49	1.01	1.01	-0.44	1.65	1.97	-0.6	1.33	0.37	0.21	1.97	1.17	1.81	0.53	1.65	0.21	1.33	1.65	2.13	1.17	-0.44	1.33
	High	Unambiguous	IWEDEGFNYIK		7.81062e-05	0.000414347	1	83	HORVU3Hr1G080530.5 HORVU3Hr1G080530	1413.67	4.4			-0.7	1.14	0.15	-0.98			0.44	-0.55	-1.54	-1.69	0.01	-1.97	-0.55	-2.39	1.57	1	-0.7	2.98	0.44	-1.12			-0.98		0.72	-0.7	-0.7	-2.54	0.44	1.71	-0.27		-1.26	-0.55	0.15	-0.7
	High	Unambiguous	YLVSPPLIER		2.92109e-05	0.000414347	1	296	HORVU3Hr1G080530.5 HORVU3Hr1G080530	1186.68	0.07	-0.26	2.1	-0.26	1.25	1.93	-0.26	-0.77	-0.26	0.07	-0.43	-0.09	-0.6	0.24	-1.44	-0.09	-0.43	0.24	-0.6	-0.6	6.31	-0.43	0.24	0.75	0.92	-1.44	0.24	0.07	1.09	1.25	-0.09	0.92	0.58	0.41	-0.09	0.58	0.58	1.42	0.07
	High	Unambiguous	MVLDAVEQVGGIYLVTADHGNAEDMVK		0.000140717	0.000414347	1	27	HORVU3Hr1G080530.5 HORVU3Hr1G080530	2874.4		-8.29		-1.73	-4.02	-0.89	-4.23	0.88	0.78	1.09	-2.25	-1.41	-0.68	-2.46		-2.46					-4.86	-3.92	-1.62		-0.47				-1.83	0.68	-3.29	-1.41	-3.08	-3.81	0.26	-3.19	-1.41	-1.73	-0.68
	High	Unambiguous	TVAVVVLDGWGEASPDQYNCIHVAQTPVMDSLK		1.39447e-05	0.000414347	2	68	HORVU3Hr1G080530.5 HORVU3Hr1G080530	3542.73		5.18			-5.27	8.12	3.6	7.78	4.62	1.12	2.36	2.25	2.7	5.29	4.28	10.9	1.46		2.92		5.41	11.24	-4.42		-6.46	3.37		0.78	1.91	5.97		2.81	2.58	-4.08	-6.71	3.37	-3.91	2.7	-3.15
	High	Unambiguous	DAILSGKFDQVR		2.42372e-05	0.000414347	1	123	HORVU3Hr1G080530.5 HORVU3Hr1G080530	1348.72	0.45	-2.09		0.67	1.56	3.12	2.01	1.12	-0.44	2.45	1.34	0.23	-0.88	1.56	0.67	-0.88	1.12	0.89	2.01	2.67	0.67	0.45	1.78	0.89	-0.66	0.89	1.56	1.12	0.01	2.67	1.56	0.23	0.01	1.78	0.89	2.01	1.34	1.34	0.45
	High	Unambiguous	AHGTAVGLPSDDDMGNSEVGHNALGAGR	1xOxidation [M14]	6.24045e-06	0.000414347	1	12	HORVU3Hr1G080530.5 HORVU3Hr1G080530	2721.23								-0.28	4.57			0.89	0.6	3.54												2.07	-1.17			-0.14		1.92		1.33					5.89
	High	Unambiguous	LVDAALASGK		2.14526e-05	0.000414347	1	241	HORVU3Hr1G080530.5 HORVU3Hr1G080530	944.541	1.7	-0.21	-2.33	-1.9	-0.42	1.06	-0.42	1.48	-0.85	-2.12	1.48	0.21	0	-0.21	0	0.42	-1.9	-1.69	-0.63	-0.63	0.42	0	0.85	-0.21	0.64	-0.21	-1.69	-0.63	-2.96	-0.85	0	0.64	0.21	-0.42	-4.45	-0.42	-0.21	1.27	-0.42
	High	Unambiguous	ESFDKGTLHLIGLLSDGGVHSR		1.9541e-05	0.000414347	1	133	HORVU3Hr1G080530.5 HORVU3Hr1G080530	2338.21				3.6	4.02	-0.89	1.67	2.74	-0.04	1.24	-1.32	-1.11	0.82	2.1	1.24	3.81	0.18	1.46	2.31	1.46	-1.75	0.18	1.03	3.6	1.46	-0.04	2.31		1.67	0.82	1.67	1.89	-0.47	1.67	1.89	1.89	-0.04	4.24	0.39
	High	Unambiguous	INLPNGDMVGHTGDIEATVVACK		3.89276e-05	0.000414347	1	127	HORVU3Hr1G080530.5 HORVU3Hr1G080530	2354.15	0.79	1.17	-1.12	-0.36	-1.12	-0.23	0.41	0.02	1.43	-1.25	-0.74	-19.73	-0.36	-0.49	0.02	0.53	1.17	1.17	1.68	-0.23	-0.36	0.66	0.28	1.04	3.21	0.15	0.66	2.57	-0.49	0.02	1.04	0.66	2.19	-1.25	1.17	-1.51	-0.49	0.02	0.41
	High	Unambiguous	SDIQTPGLANVAATVMNLHGFQAPADYETTLIEVVDK	1xDeamidated [N/Q]	4.1825e-05	0.000414347	1	13	HORVU3Hr1G080530.5 HORVU3Hr1G080530	3929.95	3.47	-9.15	5.81	2.33				7.33	2.86	32.61	1.07		6.32		4.05			4.89	-0.72		3.82	1.23	5.04	2.56	6.42	3.14			9.59	-0.29		4.28		-3.89		4.43	4.08	1.64	1.69
	High	Unambiguous	GTLHLIGLLSDGGVHSR		0.000211866	0.00060347	2	37	HORVU4Hr1G051010.4 HORVU4Hr1G051010; HORVU3Hr1G080530.5 HORVU3Hr1G080530	1731.95				-2.24	1	-1.54	1	4	0.3	0.54	0.3			0.07	-2.93	-1.08	1.46		1.46			-1.31	-1.54		3.31	-0.85						1.23	1	0.07	0.77	-2.47	-0.62	1
	High	Unambiguous	TVAVVVLDGWGEASPDQYNCIHVAQTPVMDSLK	1xDeamidated [Q/N]	0.000401371	0.000693743	2	4	HORVU3Hr1G080530.5 HORVU3Hr1G080530	3543.71																																7.93			6.58
	High	Unambiguous	LVDAALASGKIWEDEGFNYIK		0.000440634	0.000693743	1	19	HORVU3Hr1G080530.5 HORVU3Hr1G080530	2339.19	4.73				1.26	9.73		0.62	-3.48	0.5	0.37		3.96	-9.89		-0.79	-0.27	0.24	1.26	-0.79			-0.53	0.88	9.34	3.06	2.55	0.37	0.88		-16.18	1.01	1.52	-0.27	-0.4	-0.66	1.91	-0.53
	High	Selected	LHILTDGRDVLDGSSVGFVETIEKDLAQLR		0.000270437	0.000693743	1	513	HORVU3Hr1G080530.5 HORVU3Hr1G080530	3296.75	0.42	-1.85	2.4	0.58	1.79	1.33	2.4	1.64	1.64	-0.79	0.12	4.37	0.88	-0.49	1.64	0.42	2.24	1.33	-1.4	0.27	-0.94	1.03	-1.55	0.58	0.27	0.12	0.12	0.42	1.18	0.88	-0.18	1.64	-0.94	-1.7	-2	1.03	1.18	-0.33	0.58
	High	Unambiguous	FGHVTFFWNGNR	1xDeamidated [N]	0.000437482	0.000693743	2	169	HORVU4Hr1G051010.4 HORVU4Hr1G051010; HORVU3Hr1G080530.5 HORVU3Hr1G080530	1482.69	0.9	0.7	-0.72	0.3	-0.11	-1.53	2.32	1.1	-1.12	0.09	-0.72	-0.72	-1.73	-0.72	-0.72	-0.72	1.71	0.5	0.9	0.5	-0.72	0.3	0.5	2.52	2.72	1.1	1.31	1.51	-2.54	0.5	0.09	-0.11	0.9	-0.11	2.12	-0.51	-0.31	0.9	1.71
	High	Unambiguous	FGHVTFFWNGNR		0.000253517	0.000693743	2	218	HORVU4Hr1G051010.4 HORVU4Hr1G051010; HORVU3Hr1G080530.5 HORVU3Hr1G080530	1481.71	-0.1	1.12	-0.5	-2.12	-0.71	-1.52	0.71	2.33	-0.1	-0.1	1.32	-0.71	-1.52	-0.3	-1.11	-0.71	2.74	-0.3	1.32	0.31	0.71	0.51	0.31	0.31	2.13	-0.1	0.91	0.91	0.31	-0.71	-0.1	-0.1	1.72	0.31	1.72	-0.91	-1.31	1.93	1.52
	High	Unambiguous	SGSIQILTSHTLQPVPVAIGGPGLHPGVR	1xDeamidated [Q13]	0.000733571	0.000852642	1	1	HORVU3Hr1G080530.5 HORVU3Hr1G080530	2889.59										8.94								9.36							8.11				8.74	6.11
	High	Unambiguous	ATSDWTLPDHPTLPK	1xAcetyl [N-Term]	0.000816977	0.0010159	2	241	HORVU3Hr1G080530.5 HORVU3Hr1G080530	1720.85	1.07	0.96	0.49	-1.72	1.31	-1.37	0.49	2	0.84	0.49	1.19	-0.55	1.42	0.14	0.14	0.49	1.77	0.38	1.07	0.84	1.77	0.38	-0.32	1.65	1.42	0.96	0.84	0.38	0.14	1.65	0.49	1.89	1.31	1.07	0.49	0.03	0.61	0.14	1.65
	High	Selected	AADEAVKMVLDAVEQVGGIYLVTADHGNAEDMVKR		0.00136011	0.00137649	1	40	HORVU3Hr1G080530.5 HORVU3Hr1G080530	3714.85	-0.99	0.36	0.76						-0.86									1.57	-1.66	-3.01	-1.26			-1.39		0.63	0.49	-1.53			2.51	0.89				-1.93			0.36
	High	Unambiguous	TFACSETVK		0.00396395	0.00185291	1	128	HORVU3Hr1G080530.5 HORVU3Hr1G080530	985.466	-0.8	-0.19	-0.8	-3.84	-2.62	-1.41	-1.61	-1.81	-2.83	-5.46	-2.83	-3.43	-3.23	-2.22	-2.22	-3.43	-5.87	-3.84	-2.01	-4.45	-2.22	-2.42	-3.23	-4.86	-3.84	-2.62	-4.45	-2.42	-1	-3.23	-1.61	0.42	-3.03	-2.62	-2.01	-3.43	-2.62	-0.8	-1
	High	Unambiguous	ALEIAER		0.00470929	0.00196055	1	262	HORVU3Hr1G080530.5 HORVU3Hr1G080530	801.446	-6.2	-5.2	-5.45	-4.21	-5.2	-6.2	-5.45	-5.95	-4.21	-6.95	-6.7	-6.45	-5.2	-5.7	-5.7	-7.7	-6.7	-7.95	-5.7	-7.45	-5.7	-6.7	-3.71	-6.95	-6.7	-6.2	-7.7	-6.2	-6.2	-4.21	-5.95	-4.95	-5.7	-3.96	-7.2	-4.7	-6.7	-3.46	-5.2
	High	Unambiguous	GSSVGFVETIEKDLAQLR	1xAcetyl [N-Term]	0.0060112	0.00239212	1	14	HORVU3Hr1G080530.5 HORVU3Hr1G080530	1991.04	13.74	5.75		-34.18	2.74		-11.73	-25.44			2.44				-14.44	-14.89							-21.22					-1.33		-21.22		6.5		-27.1				-14.59
	High	Unambiguous	FQNALEAVK		0.00579925	0.00239212	1	46	HORVU3Hr1G080530.5 HORVU3Hr1G080530	1019.55			-8.92			-5.39	-5.59	-6.18	-4.22	-6.57	-7.94	-7.16	-6.96		-5.39				-6.96		-6.57	-5.78	-5.59				-8.33	-25.99			-7.75	-9.9	-5.2	-5.2	-2.65	-4.61	-3.04	-7.35	-8.33
	High	Selected	MYVTMDRYENDWSVVKR		0.0100796	0.00351765	1	34	HORVU3Hr1G080530.5 HORVU3Hr1G080530	2192.03	2.67	2.3	2.67	0.84		3.4		2.49		3.4		3.4	0.66	2.49		3.95		2.85		0.11				0.84	3.03	1.57	4.13	1.03	2.12	3.4	0.3	3.76	1.21		2.49	2.12	2.49	1.57	1.03
	High	Unambiguous	ANVAATVMNLHGFQAPADYETTLIEVVDK	1xAcetyl [N-Term]; 2xDeamidated [N9; N/Q]	0.0127741	0.00436389	1	20	HORVU3Hr1G080530.5 HORVU3Hr1G080530	3161.53				23.03	19.9				21.52											9.28	-2.78									12.5	23.13							-7.24	27.59
	High	Unambiguous	TSGEYLVK		0.013241	0.00436389	1	154	HORVU3Hr1G080530.5 HORVU3Hr1G080530	896.472	1.06	1.51	-0.06	-1.62	0.61	-0.95	-0.28	-0.5	-0.06	0.61	0.61	2.84	-0.5	0.84	0.84	-0.95	-0.73	0.39	1.51	-0.73	-0.28	1.95	1.51	0.84	1.06	-0.28	-1.17	0.39	1.95	0.17	0.61	-0.28	1.28	0.17	0.61	0.61	-0.06	2.4	1.51
	High	Unambiguous	SGYFDETKEEYVEIPSDSGITFNEQPK	1xDeamidated [Q/N]	0.0144323	0.00454189	1	6	HORVU3Hr1G080530.5 HORVU3Hr1G080530	3110.4			9.42		11.54		6.04	9.51				8.35	7.68	12.5	7.39		3.72						9.7											6.33	9.32	4.01
	High	Unambiguous	IASGGGR		0.0144323	0.00454189	2	14	HORVU4Hr1G051010.4 HORVU4Hr1G051010; HORVU3Hr1G080530.5 HORVU3Hr1G080530	617.337	23.61	-13	1.58	6.44	0.28	-3.93	-1.34	6.76	-1.99	15.51	-1.01	-0.04	9.03	8.06	10	4.17	20.37	0.61	2.55	7.73	-15.27	6.11	-0.69	1.58	3.85	-1.34	-7.82	-3.28	31.71	5.79	-7.49	-8.79	0.61	0.61	1.25	24.9	0.28	-6.2	-2.63
	High	Unambiguous	LHILTDGRDVLDGSSVGFVETIEK		0.0223625	0.00675248	1	3	HORVU3Hr1G080530.5 HORVU3Hr1G080530	2600.36																															-9.56
	High	Selected	TRDAILSGKFDQVR		0.0254473	0.00682521	1	4	HORVU3Hr1G080530.5 HORVU3Hr1G080530	1605.87	-2.09	-4.08	-0.6															-3.34													-2.09						0.9
	High	Unambiguous	ANDQYLPPFVIVDESGKSVGPIVDGDAVVTFNFR	1xDeamidated [N/Q]	0.0281378	0.00747639	1	14	HORVU3Hr1G080530.5 HORVU3Hr1G080530	3666.83			2.39	3.8	6.74					2.28	5.35	5.43	1.3	4.13	4.21		2.71		-0.01	7.07	0.2	4.57	2.06	6.1	6.66	5.11	7.64	2.5		1.19	4.62		1.95	2.28	5.77	4.79	4.46	6.17	5.11
	High	Unambiguous	IFAQGAK		0.0354047	0.00934146	1	235	HORVU3Hr1G080530.5 HORVU3Hr1G080530	734.42	-5.48	-3.31	-0.04	-3.03	-4.39	-3.03	-5.21	-3.31	-5.21	-2.76	-6.57	-3.03	-3.58	-4.67	-4.39	-3.58	-4.94	-7.93	-2.76	-6.85	-4.67	-4.12	-4.67	-1.13	-4.67	-2.49	-6.3	-4.12	-1.67	-3.58	-4.94	-1.94	-4.39	-1.94	-1.67	-3.58	-3.85	-2.22	-6.03
TRUE	High	Master Protein	HORVU4Hr1G059390.1 HORVU4Hr1G059390	chr4H:496746552-496749035 HC_G|Heat shock 70 kDa protein 3|none|PF00012|IPR013126, IPR018181, IPR029047, IPR029048	0	62	35	6377	11	1	651	71.2	5.21	273.7	383.85	543.79	379.84	515.31	362.72	450.38	312.21	422.89	393.18	505.21	209.65	320.54	303.67	465.3	384.45	467.96	323.34	424.53	334.32	408.74	361.17	422.61	417.19	280.43	343.46	302.96	407.36	384.51	453.05	309.93	389.31	279.43	430.97	299.71	414.1
	Confidence	PSM Ambiguity	Sequence	Modifications	Qvality PEP	Qvality q-value	# Proteins	# PSMs	Master Protein Accessions	Theo. MH+ [Da]	DeltaM [ppm] (by Search Engine): A Sequest HT	DeltaM [ppm] (by Search Engine): AA Sequest HT	DeltaM [ppm] (by Search Engine): AB Sequest HT	DeltaM [ppm] (by Search Engine): AC Sequest HT	DeltaM [ppm] (by Search Engine): AD Sequest HT	DeltaM [ppm] (by Search Engine): AE Sequest HT	DeltaM [ppm] (by Search Engine): AF Sequest HT	DeltaM [ppm] (by Search Engine): AG Sequest HT	DeltaM [ppm] (by Search Engine): AH Sequest HT	DeltaM [ppm] (by Search Engine): AI Sequest HT	DeltaM [ppm] (by Search Engine): AJ Sequest HT	DeltaM [ppm] (by Search Engine): AK Sequest HT	DeltaM [ppm] (by Search Engine): AL Sequest HT	DeltaM [ppm] (by Search Engine): AM Sequest HT	DeltaM [ppm] (by Search Engine): AN Sequest HT	DeltaM [ppm] (by Search Engine): AO Sequest HT	DeltaM [ppm] (by Search Engine): AP Sequest HT	DeltaM [ppm] (by Search Engine): AQ Sequest HT	DeltaM [ppm] (by Search Engine): AR Sequest HT	DeltaM [ppm] (by Search Engine): AS Sequest HT	DeltaM [ppm] (by Search Engine): AT Sequest HT	DeltaM [ppm] (by Search Engine): AU Sequest HT	DeltaM [ppm] (by Search Engine): AV Sequest HT	DeltaM [ppm] (by Search Engine): B Sequest HT	DeltaM [ppm] (by Search Engine): C Sequest HT	DeltaM [ppm] (by Search Engine): D Sequest HT	DeltaM [ppm] (by Search Engine): E Sequest HT	DeltaM [ppm] (by Search Engine): F Sequest HT	DeltaM [ppm] (by Search Engine): G Sequest HT	DeltaM [ppm] (by Search Engine): H Sequest HT	DeltaM [ppm] (by Search Engine): I Sequest HT	DeltaM [ppm] (by Search Engine): J Sequest HT	DeltaM [ppm] (by Search Engine): K Sequest HT	DeltaM [ppm] (by Search Engine): L Sequest HT	DeltaM [ppm] (by Search Engine): M Sequest HT	DeltaM [ppm] (by Search Engine): N Sequest HT	DeltaM [ppm] (by Search Engine): O Sequest HT	DeltaM [ppm] (by Search Engine): P Sequest HT	DeltaM [ppm] (by Search Engine): Q Sequest HT
	High	Unambiguous	TTPSYVAFTDTER		2.78219e-08	0	3	343	HORVU4Hr1G059260.3 HORVU4Hr1G059260; HORVU4Hr1G059390.1 HORVU4Hr1G059390; HORVU1Hr1G072220.4 HORVU1Hr1G072220	1487.7	0.31	-1.3	0.58	1.25	-0.5	3	-0.23	-0.23	0.58	1.12	1.12	0.58	-0.09	0.31	0.85	0.71	-1.17	1.79	1.65	2.73	2.19	0.04	0.58	0.58	-2.65	-1.84	-1.3	-0.23	-0.23	0.04	2.46	-1.04	0.85	-1.71	0.44	1.38	-0.09	2.06	-0.09
	High	Unambiguous	IINEPTAAAIAYGLDKK		1.0437e-14	0	7	333	HORVU4Hr1G059260.3 HORVU4Hr1G059260; HORVU5Hr1G113180.1 HORVU5Hr1G113180; HORVU4Hr1G059390.1 HORVU4Hr1G059390; HORVU3Hr1G086500.1 HORVU3Hr1G086500; HORVU5Hr1G021300.3 HORVU5Hr1G021300; HORVU6Hr1G081460.2 HORVU6Hr1G081460; HORVU1Hr1G072220.4 HORVU1Hr1G072220	1787.99	2.95	1.77	3.45	0.43	1.1	3.28	0.77	0.6	0.1	2.28	1.77	0.6	1.77	2.61	1.44	2.95	1.94	2.78	2.44	0.77	7.31	1.77	2.28	2.28	3.95	1.27	4.12	-0.58	1.94	3.12	-0.41	1.94	2.28	2.61	-0.58	-0.91	0.93	-0.58	0.43
	High	Unambiguous	LINEPTAAAIAYGLDK		6.29505e-09	0	11	438	HORVU4Hr1G059260.3 HORVU4Hr1G059260; HORVU5Hr1G113180.1 HORVU5Hr1G113180; HORVU4Hr1G059390.1 HORVU4Hr1G059390; HORVU2Hr1G122780.2 HORVU2Hr1G122780; HORVU3Hr1G086500.1 HORVU3Hr1G086500; HORVU6Hr1G008880.1 HORVU6Hr1G008880; HORVU5Hr1G021300.3 HORVU5Hr1G021300; HORVU6Hr1G081460.2 HORVU6Hr1G081460; HORVU1Hr1G072220.4 HORVU1Hr1G072220	1659.9	-0.78	0.43	-3.91	-3.31	-1.5	-1.38	-0.9	-0.9	-0.05	-0.66	1.63	-3.19	-2.46	-1.02	0.43	0.07	0.19	-0.05	-0.05	-0.9	1.39	1.15	-0.9	-0.17	-0.42	-1.02	-0.29	-1.26	-0.17	-0.42	-0.54	-2.46	-0.66	-0.66	-0.17	-1.98	-1.14	0.07	-0.17
	High	Unambiguous	VQQLLQDFFNGKELCK		8.86823e-10	0	8	215	HORVU4Hr1G059260.3 HORVU4Hr1G059260; HORVU5Hr1G113180.1 HORVU5Hr1G113180; HORVU4Hr1G059390.1 HORVU4Hr1G059390; HORVU3Hr1G086500.1 HORVU3Hr1G086500; HORVU5Hr1G021300.3 HORVU5Hr1G021300; HORVU6Hr1G081460.2 HORVU6Hr1G081460; HORVU1Hr1G072220.4 HORVU1Hr1G072220	1909.98	-2.46	0.21	-0.1	0.52	-1.05	-0.1	-0.1	-0.1	-2.15	-1.67	-1.52	-2.77	0.52	-3.72	0.37	0.84	-0.57	-0.57	0.21	-1.05	-2.62	3.19	-0.73	-0.42	0.37	-2.15	-1.05	0.84	-0.42	-0.73	0.21	-2.77	-2.77	-2.3	-1.52	0.21	1	-1.05	-3.09
	High	Unambiguous	VQDLLLLDVTPLSQGLETAGGVMTVLIPR		7.79321e-10	0	1	120	HORVU4Hr1G059390.1 HORVU4Hr1G059390	3048.7				1.09	-0.19	-0.29	0.01	-1.96	-4.84	1.87	-2.48	-3.93	-2.09	2.27	-3.01	-0.78	1.58	2.37	0.14	-5.63	-5.1	-2.22	-0.91			-3.66			0.1		-1.43	-3.92	-0.88	-1.67		-5.63	0.99	-3.27	-2.46
	High	Unambiguous	EQVFSTYSDNQPGVLIQVYEGER		4.48752e-21	0	6	648	HORVU4Hr1G059260.3 HORVU4Hr1G059260; HORVU4Hr1G059390.1 HORVU4Hr1G059390; HORVU5Hr1G021300.3 HORVU5Hr1G021300; HORVU6Hr1G081460.2 HORVU6Hr1G081460; HORVU1Hr1G072220.4 HORVU1Hr1G072220	2658.27	0.09	0.43	0.77	2.35	0.66	-2.95	-0.7	0.21	-1.71	1.22	-0.13	-0.47	-1.15	1.22	1.79	1.56	-1.37	-0.13	1.11	-0.02	-2.62	-0.7	1.11	0.43	-0.7	-2.05	0.32	-0.36	0.21	0.66	0.77	0.32	-1.15	-0.81	0.09	0.54	-1.37	1.22	-1.26
	High	Unambiguous	EQVFSTYSDNQPGVLIQVYEGER	1xDeamidated [Q/N]	9.09547e-08	0	6	142	HORVU4Hr1G059260.3 HORVU4Hr1G059260; HORVU4Hr1G059390.1 HORVU4Hr1G059390; HORVU5Hr1G021300.3 HORVU5Hr1G021300; HORVU6Hr1G081460.2 HORVU6Hr1G081460; HORVU1Hr1G072220.4 HORVU1Hr1G072220	2659.25		9.52	8.99	1.78	3.13	3.47	2.23	4.15		2.23	2.23		2.79		3.7	2.79	0.88	1.67	6.63	1.78	3.7	2.57	2.91		6.96	7.11	10.12	8.24	4.15	1.78	0.31	0.76	-0.14	10.27	1.33	2.57	1.21	2	6.73
	High	Unambiguous	NALENYAYNMR		3.76835e-07	0	4	346	HORVU4Hr1G059260.3 HORVU4Hr1G059260; HORVU4Hr1G059390.1 HORVU4Hr1G059390; HORVU3Hr1G086500.1 HORVU3Hr1G086500; HORVU1Hr1G072220.4 HORVU1Hr1G072220	1358.62	0.71	-1.2	-0.53	1.44	1.59	1.89	-0.17	0.12	0.14	1.3	1.3	-0.32	-0.47	0.71	-0.53	0.56	0.14	-0.62	0.12	1	-0.75	0.71	0.41	0.14	-1.63	0.14	-0.62	-1.35	-0.76	2.03	0.86	-1.63	-0.62	0.56	-0.03	0.56	-0.32	0.56	0.27
	High	Unambiguous	MYQGAGAEMPGGMDEDAPASAAGGSSGPGPK		2.98364e-09	0	1	31	HORVU4Hr1G059390.1 HORVU4Hr1G059390	2851.2					0.27	-0.67	0.27		-0.67	3.64	2.59	0.48	3.22	1.33	2.69	1.85	0.59		1.54	4.9	2.38	1.33	1.54									0.59		-0.78		-2.04		-0.04
	High	Unambiguous	MYQGAGAEMPGGMDEDAPASAAGGSSGPGPKIEEVD		2.25503e-09	0	1	39	HORVU4Hr1G059390.1 HORVU4Hr1G059390	3436.46		-0.12	-1.96		0.4			-0.12	-0.82		2.67		1.71		0.31				3.45		5.9		0.84	1.62		1.01		0.4	1.45	0.75	2.84	1.45	1.71	0.22		-0.21			1.97
	High	Unambiguous	NAVVTVPAYFNDSQR		9.61502e-09	0	7	816	HORVU4Hr1G059260.3 HORVU4Hr1G059260; HORVU5Hr1G113180.1 HORVU5Hr1G113180; HORVU4Hr1G059390.1 HORVU4Hr1G059390; HORVU3Hr1G086500.1 HORVU3Hr1G086500; HORVU5Hr1G021300.3 HORVU5Hr1G021300; HORVU6Hr1G081460.2 HORVU6Hr1G081460; HORVU1Hr1G072220.4 HORVU1Hr1G072220	1680.83	1.75	0.14	1.39	0.5	2.1	3.18	0.14	-0.04	0.32	2.64	0.14	1.03	-1.11	2.46	0.5	1.21	0.5	0.32	2.64	1.21	6.92	0.5	1.75	-0.57	1.21	0.32	3.53	1.57	0.68	2.1	0.5	3	1.03	1.75	0.86	1.57	1.39	1.39	-0.75
	High	Unambiguous	NQVAMNPINTVFDAK		4.26403e-10	0	4	341	HORVU5Hr1G113180.1 HORVU5Hr1G113180; HORVU4Hr1G059390.1 HORVU4Hr1G059390; HORVU5Hr1G021300.3 HORVU5Hr1G021300; HORVU6Hr1G081460.2 HORVU6Hr1G081460	1661.83	0.82	1.42	-0.63	1.06	0.21	-0.03	-0.51	-0.63	0.46	0.34	0.21	0.21	-0.03	-3.03	0.21	-0.63	0.09	0.82	1.78	2.02	0.7	0.21	-0.15	2.5	-0.03	-0.15	-0.63	0.94	-1.59	0.46	0.46	0.58	0.21	-0.27	0.34	-0.27	-0.39	1.3	1.9
	High	Unambiguous	NQVAMNPINTVFDAKR		6.82277e-12	0	4	203	HORVU5Hr1G113180.1 HORVU5Hr1G113180; HORVU4Hr1G059390.1 HORVU4Hr1G059390; HORVU5Hr1G021300.3 HORVU5Hr1G021300; HORVU6Hr1G081460.2 HORVU6Hr1G081460	1817.93	1.85	1.36	1.36	2.02	1.36	0.37	0.2	2.35	2.18	1.19	1.52	0.04	0.04	0.86	0.04	1.03	2.84	1.69	0.86	1.19	2.18	2.02	1.69	2.35	2.18	0.86	1.36	0.2	-1.61	1.19	1.19	2.51	1.69	1.52	-0.46	0.04	0.2	2.02	2.02
	High	Unambiguous	ATAGDTHLGGEDFDNR		5.78633e-08	0	6	417	HORVU5Hr1G113180.1 HORVU5Hr1G113180; HORVU4Hr1G059390.1 HORVU4Hr1G059390; HORVU3Hr1G086500.1 HORVU3Hr1G086500; HORVU5Hr1G021300.3 HORVU5Hr1G021300; HORVU6Hr1G081460.2 HORVU6Hr1G081460; HORVU1Hr1G072220.4 HORVU1Hr1G072220	1675.73	3.93	3.03	0.35	2.49	0.88	1.24	1.24	2.49	2.49	-0.01	2.67	1.24	0.7	0.53	1.06	2.49	-0.01	0.17	2.32	1.06	3.03	1.6	1.96	0.88	1.96	1.96	0.7	1.78	2.67	0.88	2.14	-0.37	1.96	1.42	1.6	-0.55	1.6	-0.37	1.96
	High	Unambiguous	SINPDEAVAYGAAVQAAILTGEGNEK		2.17143e-10	0	1	55	HORVU4Hr1G059390.1 HORVU4Hr1G059390	2588.28				-6.61	2.08	3.71	1.16	5.45	6.14	0.35	-0.47			-5.1	-3.83	-2.9	-1.86	0.23	5.68	3.48	1.97	-0.81	-3.13	3.01					-0.12	-1.39		0.81	-0.81	-0.7			3.82	-1.39
	High	Unambiguous	TLSSTAQTTIEIDSLFEGIDFYTTITR		4.91485e-07	0	1	47	HORVU4Hr1G059390.1 HORVU4Hr1G059390	3023.51			0.46								-2.12		0.36		0.36								2.35	0.86		0.76		3.34		1.55		0.36	-0.13	-2.02	-7.18
	High	Unambiguous	FSDASVQSDAK		9.58224e-07	0.000341594	1	177	HORVU4Hr1G059390.1 HORVU4Hr1G059390	1154.53	2.35	0.62	-3.54	-2.15	-0.77	0.27	0.1	0.1	-0.25	-1.11	1.49	1.14	-1.29	-1.11	0.1	-1.11	-0.42	2.53	-0.25	-0.07	-0.59	2.53	-1.63	1.49	0.27	-0.07	0.62	1.14	0.62	1.31	-0.42	-3.02	-1.11	-0.42	-0.07	-0.42	-1.29	-1.63	1.31
	High	Unambiguous	MYQGAGAEMPGGMDEDAPASAAGGSSGPGPKIEEVD	1xDeamidated [Q3]	2.45415e-06	0.000341594	1	28	HORVU4Hr1G059390.1 HORVU4Hr1G059390	3437.45	8.51			4.23	7.9	8.42	3.62		4.76	7.03	3.01	3.97	4.06	6.68	8.6	9.38	5.02	7.46		8.25		8.6		8.07	7.03	8.6	8.16	7.55	6.85	7.46	6.5	9.56	7.29	7.46		6.24	8.07	5.46
	High	Unambiguous	VQQLLQDFFNGK		2.50757e-06	0.000341594	9	58	HORVU4Hr1G059260.3 HORVU4Hr1G059260; HORVU5Hr1G113180.1 HORVU5Hr1G113180; HORVU4Hr1G059390.1 HORVU4Hr1G059390; HORVU3Hr1G086500.1 HORVU3Hr1G086500; HORVU5Hr1G021300.3 HORVU5Hr1G021300; HORVU6Hr1G081460.2 HORVU6Hr1G081460; HORVU1Hr1G072220.4 HORVU1Hr1G072220	1436.75				-0.92	-0.5	-2.17	-1.75			-1.89	-2.17		-1.89	-0.22	-1.89	0.06	-1.75	-0.92	-1.06			-1.47	-2.45		-1.75	-2.45	-3		-2.45	-2.31			-2.45	-2.45	-2.87	-2.45	-2.45	-2.31
	High	Unambiguous	VEIIANDQGNR		3.00619e-05	0.000414347	12	112	HORVU5Hr1G113180.1 HORVU5Hr1G113180; HORVU4Hr1G059390.1 HORVU4Hr1G059390; HORVU2Hr1G122780.2 HORVU2Hr1G122780; HORVU3Hr1G086500.1 HORVU3Hr1G086500; HORVU6Hr1G008880.1 HORVU6Hr1G008880; HORVU5Hr1G021300.3 HORVU5Hr1G021300; HORVU6Hr1G081460.2 HORVU6Hr1G081460; HORVU1Hr1G072220.4 HORVU1Hr1G072220; HORVU5Hr1G078400.1 HORVU5Hr1G078400	1228.63	1.37	2.35	-4	-0.09	-3.02	0.07	-1.56	-0.75	0.23	0.72	-1.72	1.7	-0.09	-0.91	-0.75	-0.09	-1.72	-4.65	-3.02	-0.58	-0.42	-0.09	1.86		0.39	-0.26	-5.63	-2.37	0.56	-2.21	1.53	-3.19	0.88	-0.26	4.14	-1.07	-0.75	-3.84	2.51
	High	Unambiguous	ARFEELNMDLFR		8.39196e-05	0.000414347	7	125	HORVU4Hr1G059260.3 HORVU4Hr1G059260; HORVU5Hr1G113180.1 HORVU5Hr1G113180; HORVU4Hr1G059390.1 HORVU4Hr1G059390; HORVU3Hr1G086500.1 HORVU3Hr1G086500; HORVU2Hr1G112630.2 HORVU2Hr1G112630; HORVU1Hr1G072220.4 HORVU1Hr1G072220	1540.76	2.9	7.38	0.96	3.29	4.46	5.24	2.51	2.32	0.96	2.71	-0.21	1.74	-0.8	1.35	0.96	9.52	0.76	1.54	1.74	2.71	-0.41	3.49	2.12	2.32	1.54	-0.41	4.46	2.71	-0.6	3.1	1.15	1.54	-0.41	-0.02		1.15	10.69	6.6	1.15
	High	Unambiguous	MDKSTVHDVVLVGGSTR		7.10128e-06	0.000414347	6	110	HORVU4Hr1G059390.1 HORVU4Hr1G059390; HORVU3Hr1G086500.1 HORVU3Hr1G086500; HORVU5Hr1G021300.3 HORVU5Hr1G021300; HORVU6Hr1G081460.2 HORVU6Hr1G081460; HORVU1Hr1G072220.4 HORVU1Hr1G072220	1800.93	0.51	1.84	2.28	1.17	1.4	1.16	2.06	1.62	2.73	1.4	1.17	-0.83		0.51	2.28	1.17	2.28	3.39	-0.16	1.4	2.51	0.51	0.95	2.06	1.17		1.62	0.73	2.73	0.51	0.95	0.95		2.73	3.62	0.95	2.51	1.84	3.62
	High	Unambiguous	MVNHFVQEFK		9.95116e-06	0.000414347	8	264	HORVU4Hr1G059260.3 HORVU4Hr1G059260; HORVU5Hr1G113180.1 HORVU5Hr1G113180; HORVU4Hr1G059390.1 HORVU4Hr1G059390; HORVU3Hr1G086500.1 HORVU3Hr1G086500; HORVU5Hr1G021300.3 HORVU5Hr1G021300; HORVU6Hr1G081460.2 HORVU6Hr1G081460; HORVU1Hr1G072220.4 HORVU1Hr1G072220	1278.63	0.23	-0.01	1.17	2.34	1.64	0.93	1.87	4.22	0.93	0.46	0.46	0.93	0.46	2.11	2.11	-0.24	2.34	0.7	2.81	3.75	1.4	0.23	2.81	1.17	-1.18	1.17	0.23	-0.01	0.7	3.28	3.51	-0.01	0.46	1.17	1.87	1.17	1.4	2.81	1.64
	High	Unambiguous	MYQGAGAEMPGGMDEDAPASAAGGSSGPGPK	1xDeamidated [Q3]	1.96818e-05	0.000414347	1	57	HORVU4Hr1G059390.1 HORVU4Hr1G059390	2852.18	6.26	5.95	4.9	8.89	6.05	9.94	7.31	8.26	8.05	10.58	8.47	6.05	7.42	7.1	8.04	12.05	4.9	8.16	6.26	10.58	6.37	6.47	7.84	7.74	7.1	8.47	3.95	8.16	7.21	8.26	9	5.63	6.58	7.31	9.31	8.05	9.1	7.21	8.58
	High	Unambiguous	STVHDVVLVGGSTR		1.09246e-05	0.000414347	6	207	HORVU4Hr1G059390.1 HORVU4Hr1G059390; HORVU3Hr1G086500.1 HORVU3Hr1G086500; HORVU5Hr1G021300.3 HORVU5Hr1G021300; HORVU6Hr1G081460.2 HORVU6Hr1G081460; HORVU1Hr1G072220.4 HORVU1Hr1G072220	1426.76	-1.49	-0.43	0.41	-0.86	-0.43	0.41	0.2	-0.86	-0.65	0.62	-0.43	-2.33	-2.54	-1.49	2.51	1.46	-0.22	-0.22	0.83	-0.43	-0.86	1.25	0.41	0.41	1.46	0.2	0.41	-0.43	3.35	-0.22	-1.7	-2.12	-2.12	-1.07	-0.01	-2.96	0.41	-0.65	0.83
	High	Unambiguous	VQQLLQDFFNGKELCK	1xDeamidated [Q/N]	9.60029e-06	0.000414347	8	81	HORVU4Hr1G059260.3 HORVU4Hr1G059260; HORVU5Hr1G113180.1 HORVU5Hr1G113180; HORVU4Hr1G059390.1 HORVU4Hr1G059390; HORVU3Hr1G086500.1 HORVU3Hr1G086500; HORVU5Hr1G021300.3 HORVU5Hr1G021300; HORVU6Hr1G081460.2 HORVU6Hr1G081460; HORVU1Hr1G072220.4 HORVU1Hr1G072220	1910.97	0.52	-1.84	-0.74	-2.47	-4.04	1.14	0.99	-2.15	-4.35	-1.21	-3.72	-0.11	-0.74	-0.9	-1.37	0.83	-0.9	-2	0.2	-1.05	-2.62	1.14	-0.27	-2.47	-0.11	-1.84	-0.9	-1.37	-0.58	-2.47	-2.62	-0.11	-4.98	-4.19	-2.62	-3.09	0.52	-2.94	-1.21
	High	Unambiguous	VQDLLLLDVTPLSQGLETAGGVMTVLIPR	1xDeamidated [Q]	5.33877e-05	0.000414347	1	10	HORVU4Hr1G059390.1 HORVU4Hr1G059390	3049.69							0.88	3.93										6.39									4.43				6.1
	High	Unambiguous	FEELNMDLFR		0.000134784	0.000414347	7	14	HORVU4Hr1G059260.3 HORVU4Hr1G059260; HORVU5Hr1G113180.1 HORVU5Hr1G113180; HORVU4Hr1G059390.1 HORVU4Hr1G059390; HORVU3Hr1G086500.1 HORVU3Hr1G086500; HORVU2Hr1G112630.2 HORVU2Hr1G112630; HORVU1Hr1G072220.4 HORVU1Hr1G072220	1313.62						2.19	0.21		-0.25	2.95				2.49	1.73	3.1							8.13							4.32	4.17		5.99		4.47		3.1
	High	Unambiguous	DAGVISGLNVMR		2.77793e-05	0.000414347	1	89	HORVU4Hr1G059390.1 HORVU4Hr1G059390	1231.65		-9.91	-2.12	-0.33	-0.01	2.59	-1.47	-0.33	-0.66	0.97	-0.66	0.97	-1.96	0.16	-1.14	-0.17	-0.17	-0.33	-2.44	-4.07	-8.29	-0.17	-1.31	-5.04	-1.14	0.5		-7.31	-1.47	0.64	0.16	-1.47	1.13	0.16	0.64	-0.66	-0.17	2.27	-0.33
	High	Unambiguous	ITITNDKGR		9.08154e-05	0.000414347	8	327	HORVU4Hr1G059260.3 HORVU4Hr1G059260; HORVU5Hr1G113180.1 HORVU5Hr1G113180; HORVU4Hr1G059390.1 HORVU4Hr1G059390; HORVU3Hr1G086500.1 HORVU3Hr1G086500; HORVU5Hr1G021300.3 HORVU5Hr1G021300; HORVU6Hr1G081460.2 HORVU6Hr1G081460; HORVU1Hr1G072220.4 HORVU1Hr1G072220	1017.57	-7.95	-0.87	-3.53	-7.95	-1.17	-4.11	-4.41	-4.7	-3.82	-4.41	-4.11	-1.76	-2.94	-2.35	-4.41	-0.58	-3.82	-8.54	-3.82	-4.7	-3.23	-4.7	-6.18	-1.46	-9.72	-5.29	-4.7	-3.53	-1.76	-7.06	-8.54	-5.59	-3.82	-5	-2.05	-3.23	-3.23	-1.46	-4.7
	High	Unambiguous	ATAGDTHLGGEDFDNRMVNHFVQEFK		0.00034028	0.000693743	6	3	HORVU5Hr1G113180.1 HORVU5Hr1G113180; HORVU4Hr1G059390.1 HORVU4Hr1G059390; HORVU3Hr1G086500.1 HORVU3Hr1G086500; HORVU5Hr1G021300.3 HORVU5Hr1G021300; HORVU6Hr1G081460.2 HORVU6Hr1G081460; HORVU1Hr1G072220.4 HORVU1Hr1G072220	2935.34	1.06	2.08	1.23	9.88															7.7					1.74				2.93			9.33
	High	Unambiguous	NDQGNRTTPSYVAFTDTER	1xAcetyl [N-Term]; 2xDeamidated [Q3; N5]	0.000494268	0.000693743	3	38	HORVU4Hr1G059260.3 HORVU4Hr1G059260; HORVU4Hr1G059390.1 HORVU4Hr1G059390; HORVU1Hr1G072220.4 HORVU1Hr1G072220	2215.97		16.04	16.85		14.82		20.5			19.96	18.07			18.47	19.96	18.34			16.58		18.47		17.12	16.98	15.49	15.22		18.34		17.66				16.71	16.85	16.31		18.61
	High	Unambiguous	NALENYAYNMR	1xOxidation [M10]	0.000264675	0.000693743	4	11	HORVU4Hr1G059260.3 HORVU4Hr1G059260; HORVU4Hr1G059390.1 HORVU4Hr1G059390; HORVU3Hr1G086500.1 HORVU3Hr1G086500; HORVU1Hr1G072220.4 HORVU1Hr1G072220	1374.61	1.2	-1.42	2.8			-0.69		1.49				-1.27		5.85		0.33	4.55		1.93		-5.78			-0.69								6.15	-1.57	-0.26	1.64				0.76
	High	Unambiguous	NVLIFDLGGGTFDVSLLTIEEGIFEVK		0.000583005	0.000693743	7	4	HORVU4Hr1G059260.3 HORVU4Hr1G059260; HORVU5Hr1G113180.1 HORVU5Hr1G113180; HORVU4Hr1G059390.1 HORVU4Hr1G059390; HORVU3Hr1G086500.1 HORVU3Hr1G086500; HORVU5Hr1G021300.3 HORVU5Hr1G021300; HORVU6Hr1G081460.2 HORVU6Hr1G081460; HORVU1Hr1G072220.4 HORVU1Hr1G072220	2925.55
	High	Unambiguous	QATKDAGVISGLNVMR		0.000260902	0.000693743	1	2	HORVU4Hr1G059390.1 HORVU4Hr1G059390	1659.88			-0.19																					-2.36					-21.7										0.71
	High	Unambiguous	VIPGPADKPMIGVQYR		0.000702644	0.000693743	1	18	HORVU4Hr1G059390.1 HORVU4Hr1G059390	1740.95					0.98	0.64	2.36			2.19	-1.09					1.33	-0.57					0.81	0.81			-0.4			0.47			-0.91					0.12	0.81
	High	Unambiguous	NAVVTVPAYFNDSQR	1xDeamidated [Q/N]	0.000890478	0.00115556	7	30	HORVU4Hr1G059260.3 HORVU4Hr1G059260; HORVU5Hr1G113180.1 HORVU5Hr1G113180; HORVU4Hr1G059390.1 HORVU4Hr1G059390; HORVU3Hr1G086500.1 HORVU3Hr1G086500; HORVU5Hr1G021300.3 HORVU5Hr1G021300; HORVU6Hr1G081460.2 HORVU6Hr1G081460; HORVU1Hr1G072220.4 HORVU1Hr1G072220	1681.82		1.6	0.65	-1.01	0.89	3.39		1.49		1.01	-7.9					-9.5	1.13	-6.11	0.18	0.18	9.33	34.92	-8.97			-8.79	5.41		0.41	-7.9	2.2	-9.86					-9.86		-0.42
	High	Selected	NTTIPTKKEQVFSTYSDNQPGVLIQVYEGER		0.00221608	0.00137649	6	9	HORVU4Hr1G059260.3 HORVU4Hr1G059260; HORVU4Hr1G059390.1 HORVU4Hr1G059390; HORVU5Hr1G021300.3 HORVU5Hr1G021300; HORVU6Hr1G081460.2 HORVU6Hr1G081460; HORVU1Hr1G072220.4 HORVU1Hr1G072220	3541.78		1.03	-0.21
	High	Unambiguous	EQVFSTYSDNQPGVLIQVYEGER	2xDeamidated [Q/N]	0.00212265	0.00137649	6	9	HORVU4Hr1G059260.3 HORVU4Hr1G059260; HORVU4Hr1G059390.1 HORVU4Hr1G059390; HORVU5Hr1G021300.3 HORVU5Hr1G021300; HORVU6Hr1G081460.2 HORVU6Hr1G081460; HORVU1Hr1G072220.4 HORVU1Hr1G072220	2660.24		11.92	13.16						-2.4		-3.19																	7.97					-2.74
	High	Unambiguous	NTTIPTKK		0.00750954	0.00300571	14	130	HORVU4Hr1G059260.3 HORVU4Hr1G059260; HORVU5Hr1G113180.1 HORVU5Hr1G113180; HORVU4Hr1G059390.1 HORVU4Hr1G059390; HORVU3Hr1G086500.1 HORVU3Hr1G086500; HORVU3Hr1G073230.1 HORVU3Hr1G073230; HORVU5Hr1G021300.3 HORVU5Hr1G021300; HORVU4Hr1G012460.1 HORVU4Hr1G012460; HORVU4Hr1G089090.2 HORVU4Hr1G089090; HORVU6Hr1G081460.2 HORVU6Hr1G081460; HORVU1Hr1G072220.4 HORVU1Hr1G072220	902.531	1.29	-1.15	-2.48	-1.37	-2.48	-0.26	-0.92	-2.92	-1.81	-2.48	-4.69	-2.92	-5.36	-2.7	-4.25	-1.59	-2.03	-0.7	-1.37	0.63	-2.7	-1.59	-2.25	-2.25	0.18	-3.81	-0.92	-2.7	-1.59	-3.81	-0.26	0.18	-3.14	-2.7	-1.12	-4.47	-0.92	-3.14	1.29
	High	Unambiguous	NQVAMNPINTVFDAKR	1xOxidation [M5]	0.010299	0.00361969	4	8	HORVU5Hr1G113180.1 HORVU5Hr1G113180; HORVU4Hr1G059390.1 HORVU4Hr1G059390; HORVU5Hr1G021300.3 HORVU5Hr1G021300; HORVU6Hr1G081460.2 HORVU6Hr1G081460	1833.93		-0.35	-0.52	1.77	3.08	-0.02	0.14		-3.13				0.63		-0.35	7.01		4.56	-0.84		2.59				2.43		3.9		2.59	2.27						0.14	0.3	0.63
	High	Unambiguous	VQDLLLLDVTPLSQGLETAGGVMTVLIPR	2xDeamidated [Q2; Q14]	0.0173939	0.0052397	1	3	HORVU4Hr1G059390.1 HORVU4Hr1G059390	3050.67														7.76						9.24
	High	Unambiguous	MKETAEAYLGTTIK		0.023515	0.0067842	1	6	HORVU4Hr1G059390.1 HORVU4Hr1G059390	1555.8	1.5		1.3		2.46	4.19	4.58	8.94	2.84	1.88	2.46					-0.05		1.88	5.16	3.42		5.47	4.19	-0.05	1.11	-0.82	0.15		-1.2	2.07		-0.82		0.34	4.58	2.84	3.04		3.42
	High	Unambiguous	MYQGAGAEMPGGMDEDAPASAAGGSSGPGPKIE		0.0256306	0.00702089	1	5	HORVU4Hr1G059390.1 HORVU4Hr1G059390	3093.32					-0.22	6.67	-1.87				2.01				1.33								-0.61									2.01				-1
	High	Unambiguous	DISGNPR		0.0261886	0.00709161	8	129	HORVU4Hr1G059260.3 HORVU4Hr1G059260; HORVU5Hr1G113180.1 HORVU5Hr1G113180; HORVU4Hr1G059390.1 HORVU4Hr1G059390; HORVU3Hr1G086500.1 HORVU3Hr1G086500; HORVU5Hr1G021300.3 HORVU5Hr1G021300; HORVU6Hr1G081460.2 HORVU6Hr1G081460; HORVU1Hr1G072220.4 HORVU1Hr1G072220	758.379	-5.83	-1.61	-1.34	-3.72	-2.13	-5.04	-2.66	-4.77	-3.45	-5.56	-6.09	-3.19	-5.83	-6.62	-4.51	-4.77	-4.77	-4.51	-6.35	-2.13	-4.77	-5.83	-6.88	-3.98	-3.45	-5.04	-6.62	-3.98	-3.72	-2.66	-4.51	-2.66	-6.62	-2.93	-3.45	-3.98	-5.04	-2.13	-3.45
TRUE	High	Master Protein	HORVU7Hr1G074690.1 HORVU7Hr1G074690	chr7H:428679230-428682627 HC_G|glyceraldehyde-3-phosphate dehydrogenase C2|GO:0006006, GO:0016620, GO:0050661, GO:0051287, GO:0055114|PF00044, PF02800|IPR006424, IPR016040, IPR020828, IPR020829, IPR020830, IPR020831	0	85	26	14302	19	1	325	35.1	6.81	707.6	713.54	1003.79	651.96	1018.96	680.36	873.42	816.1	993.03	797.94	1022.85	565.6	852.46	686.69	972.24	570.35	882.49	725.5	993.43	628.17	833.18	606.95	883.68	1027.73	678.4	921.55	638.14	877.38	785.39	1095.18	751.47	1029.44	806.25	1118.99	717.58	1137.09
	Confidence	PSM Ambiguity	Sequence	Modifications	Qvality PEP	Qvality q-value	# Proteins	# PSMs	Master Protein Accessions	Theo. MH+ [Da]	DeltaM [ppm] (by Search Engine): A Sequest HT	DeltaM [ppm] (by Search Engine): AA Sequest HT	DeltaM [ppm] (by Search Engine): AB Sequest HT	DeltaM [ppm] (by Search Engine): AC Sequest HT	DeltaM [ppm] (by Search Engine): AD Sequest HT	DeltaM [ppm] (by Search Engine): AE Sequest HT	DeltaM [ppm] (by Search Engine): AF Sequest HT	DeltaM [ppm] (by Search Engine): AG Sequest HT	DeltaM [ppm] (by Search Engine): AH Sequest HT	DeltaM [ppm] (by Search Engine): AI Sequest HT	DeltaM [ppm] (by Search Engine): AJ Sequest HT	DeltaM [ppm] (by Search Engine): AK Sequest HT	DeltaM [ppm] (by Search Engine): AL Sequest HT	DeltaM [ppm] (by Search Engine): AM Sequest HT	DeltaM [ppm] (by Search Engine): AN Sequest HT	DeltaM [ppm] (by Search Engine): AO Sequest HT	DeltaM [ppm] (by Search Engine): AP Sequest HT	DeltaM [ppm] (by Search Engine): AQ Sequest HT	DeltaM [ppm] (by Search Engine): AR Sequest HT	DeltaM [ppm] (by Search Engine): AS Sequest HT	DeltaM [ppm] (by Search Engine): AT Sequest HT	DeltaM [ppm] (by Search Engine): AU Sequest HT	DeltaM [ppm] (by Search Engine): AV Sequest HT	DeltaM [ppm] (by Search Engine): B Sequest HT	DeltaM [ppm] (by Search Engine): C Sequest HT	DeltaM [ppm] (by Search Engine): D Sequest HT	DeltaM [ppm] (by Search Engine): E Sequest HT	DeltaM [ppm] (by Search Engine): F Sequest HT	DeltaM [ppm] (by Search Engine): G Sequest HT	DeltaM [ppm] (by Search Engine): H Sequest HT	DeltaM [ppm] (by Search Engine): I Sequest HT	DeltaM [ppm] (by Search Engine): J Sequest HT	DeltaM [ppm] (by Search Engine): K Sequest HT	DeltaM [ppm] (by Search Engine): L Sequest HT	DeltaM [ppm] (by Search Engine): M Sequest HT	DeltaM [ppm] (by Search Engine): N Sequest HT	DeltaM [ppm] (by Search Engine): O Sequest HT	DeltaM [ppm] (by Search Engine): P Sequest HT	DeltaM [ppm] (by Search Engine): Q Sequest HT
	High	Unambiguous	VALQSDDVELVAVNDPFITTEYMTYMFK		7.88233e-22	0	1	1633	HORVU7Hr1G074690.1 HORVU7Hr1G074690	3239.55	0.64	0.08	3.32	-0.75	1.38	0.92	1.01	1.66	0.08	1.1	-0.66	0.73	1.29	0.08	0.82	2.3	0.36	1.29	-0.66	0.45	1.01	0.17	1.1	-1.95	-0.57	-0.47	0.08	-0.2	-0.01	1.29	-0.94	1.47	-0.2	0.45	0.36	0.45	-0.29	-1.4	-0.29
	High	Unambiguous	VALQSDDVELVAVNDPFITTEYMTYMFK	1xOxidation [M]	7.22609e-12	0	1	40	HORVU7Hr1G074690.1 HORVU7Hr1G074690	3255.55											-1.06	1.8	-0.6		-3.09							0.69	0.69										0.23	1.52
	High	Unambiguous	LKGIMGYVEEDLVSTDFVGDSR		1.84375e-13	0	1	635	HORVU7Hr1G074690.1 HORVU7Hr1G074690	2430.19	-0.03	0.71	-0.15	-0.28	2.32	-1.02	1.21	1.21	0.96	0.09	1.21	-0.89	0.84	-0.77	-0.15	-1.51	0.22	0.96	-0.15	1.45	-2	0.84	0.47	-0.4	-1.39	1.08	1.95	-0.52	0.34	1.45	-0.03	1.08	-0.65	0.84	-0.28	-1.26	0.84	-0.4	-1.63
	High	Unambiguous	VALQSDDVELVAVNDPFITTEYMTYMFK	1xDeamidated [N/Q]; 1xOxidation [M]	4.4048e-08	0	1	25	HORVU7Hr1G074690.1 HORVU7Hr1G074690	3256.53							10.82	7.41	5.85		4.83			8.15			8.06																3.73	7.41		6.95
	High	Unambiguous	VALQSDDVELVAVNDPFITTEYMTYMFKYDTVHGHWK		1.70055e-14	0	1	358	HORVU7Hr1G074690.1 HORVU7Hr1G074690	4363.07	0.64	1.78	1.7			6.02		4.31	-2.56	4.54		0.98	0.32	4.76	3.49			2.82	2.01	2.82	-0.51	3.39	3.49	0.75	1.67	2.24	2.47	2.7	4.42	1.78	1.9	-0.36	1.44	0.64	3.96		4.08	1.1	0.41
	High	Unambiguous	TVDGPSSKDWR		3.85039e-07	0	2	524	HORVU7Hr1G074690.1 HORVU7Hr1G074690; HORVU6Hr1G054520.3 HORVU6Hr1G054520	1247.6	-1.88	1.25	1.97	-2.36	-1.64	-0.44	-0.68	0.05	0.29	-0.92	-2.84	1.49	-0.44	-0.2	0.05	-2.36	-1.64	-0.92	-0.44	-1.4	-0.44	0.53	-1.16	-0.2	1.25	-0.92	-0.2	-0.92	-1.88	-2.12	-0.68	-3.32	2.21	-1.88	0.77	-2.12	-4.76	0.05	0.29
	High	Unambiguous	LTGMSFRVPTVDVSVVDLTVR		1.15663e-09	0	1	103	HORVU7Hr1G074690.1 HORVU7Hr1G074690	2291.24		-0.01	-3.03	-3.55	-0.41	-3.81	0.64	-0.54	-0.67	-2.11	-4.86	-1.19	-1.32	-1.58	-2.76	-3.29	-3.03	-4.07	-1.58	-0.93	-5.77	-4.99	-1.58	-1.84	-1.98	0.26	-2.63		-0.54	-0.54	-1.45	0.64	-1.19	-0.41	-0.8	-0.93	-0.28	-0.54	-7.48
	High	Unambiguous	GIMGYVEEDLVSTDFVGDSR		8.14586e-17	0	1	934	HORVU7Hr1G074690.1 HORVU7Hr1G074690	2189.01	-1.26	0.2	2.03	-1.17	1.2	-0.81	0.84	-0.35	0.38	-0.35	-0.26	0.56	1.75	-0.72	0.38	1.39	-0.35	-0.35	-0.72	0.29	-1.54	-0.44	0.02	0.11	-0.44	0.2	0.56	-1.72	0.47	-0.17	-0.99	0.47	-1.81	0.56	0.47	0.11	-0.08	0.93	-1.08
	High	Unambiguous	VINDNFGIIEGLMTTVHAITATQK	1xDeamidated [Q/N]	1.7231e-07	0	1	58	HORVU7Hr1G074690.1 HORVU7Hr1G074690	2587.34		0.52	5.93	2.22	1.17	-5.21	2.22	2.8	1.52	1.98	2.45				5.35	-0.22	1.75	2.1	0.48	0.24	0.82	9.17	3.14	-2.54			0.94	1.4				1.52			3.62	1.29
	High	Unambiguous	VLPELNGKLTGMSFR	1xDeamidated [N6]	3.31155e-07	0	1	211	HORVU7Hr1G074690.1 HORVU7Hr1G074690	1662.89	1.38	2.28	-0.43	-1.15	0.3	1.02	1.56	2.1	1.38	-0.06	-0.06	-0.06	-0.24	-0.79	-0.43	-1.15	1.92	2.64	-1.15	1.92	-0.97	0.48	-0.24	3.18	3.9	-2.77	0.3	3.36	-0.97	-0.06	-0.24	1.38	0.66	-1.51	1.02	-0.24	0.12	1.2	1.2
	High	Unambiguous	VPTVDVSVVDLTVRTEK		8.25101e-14	0	1	290	HORVU7Hr1G074690.1 HORVU7Hr1G074690	1857.03	0.42	0.26	-2.33	-0.07	1.23	-1.36	0.58	2.84	0.58	-2.65	0.1	-0.23	0.1	-0.39	-0.07	-1.84	0.58	-0.87	1.55	0.42	1.55	-0.39	-0.23	0.1	1.39	0.58	0.26	0.58	-0.07	-0.87	-1.2	0.9	1.39	1.87	0.9	-1.36	-2.33	0.74	1.71
	High	Unambiguous	VPTVDVSVVDLTVR		1.99901e-12	0	2	1122	HORVU7Hr1G074690.1 HORVU7Hr1G074690; HORVU6Hr1G054520.3 HORVU6Hr1G054520	1498.85	0.93	-0.67	0.68	2.66	3.28	-0.67	2.08	-0.67	-0.13	1.19	-0.13	1.06	0.48	1.08	0.68	2.66	1.08	0.48	1.48	1.06	-0.53	-0.41	1.48	-0.54	0.93	0.28	-0.54	0.28	-0.33	2.08	1.48	1.48	-0.33	2.08	0.79	1.08	-0.14	2.48	0.39
	High	Unambiguous	VINDNFGIIEGLMTTVHAITATQK		4.97308e-16	0	1	3197	HORVU7Hr1G074690.1 HORVU7Hr1G074690	2586.36	1.46	-0.55	2.39	-0.86	4.55	1.3	3.31	2.39	2.85	0.22	0.38	1.77	1.15	1.77	0.99	-0.4	2.08	1.61	1.3	-0.4	-0.55	0.53	1.77	0.53	-0.86	2.54	-0.4	2.08	2.39	0.68	0.84	3	1.15	3.47	-0.09	2.54	1.3	1.15	-0.71
	High	Unambiguous	AASFNIIPSSTGAAK		1.00571e-07	0	2	794	HORVU7Hr1G074690.1 HORVU7Hr1G074690; HORVU6Hr1G054520.3 HORVU6Hr1G054520	1434.76	-0.28	0	-1.95	1.26	0.98	0.98	1.95	1.12	0.56	-0.69	3.07	-0.83	0.84	0.98	2.79	3.63	1.68	0.98	2.79	3.35	5.44	1.81	1.12	2.09	-0.28	2.37	-0.14	0.56	2.09	-1.39	2.65	2.37	2.23	3.07	-0.14	0.84	0.56	-0.14	0.84
	High	Unambiguous	NPEEIPWGEAGADYVVESTGVFTDKDK		7.29186e-11	0	2	322	HORVU7Hr1G074690.1 HORVU7Hr1G074690	2953.37	1.17	-0.15	0.97	0.36	0.16	0.76	2.8	-0.25	0.26	0.56	-0.15	2.49	1.58	-0.25	1.58	0.76	-0.96	0.46	1.88	1.68	-0.05	-0.35	1.37	1.88	3	0.97	3.3	-1.37	1.17	-1.57	0.05	0.46	-2.38	1.48	0.66	1.78	0.56	-1.98	-0.76
	High	Unambiguous	TLLFGEKPVTVFGVR		1.87459e-08	0	1	369	HORVU7Hr1G074690.1 HORVU7Hr1G074690	1662.96	-1.75	-3.91		0.78	1.32	-0.3	0.6	0.96	-1.75	0.24	-1.03	-0.49	-1.39	-0.67	-0.85	1.5	1.68	-1.75	-0.67	-1.75	-1.93	-0.3	0.06	-1.21	0.06	-0.67	1.5	-1.75	0.24	-0.49	-0.49	0.6	0.96	-0.85	-0.67	-0.49	0.42	1.68	-1.21
	High	Unambiguous	LVSWYDNEWGYSNR		4.56419e-12	0	2	975	HORVU7Hr1G108580.2 HORVU7Hr1G108580; HORVU7Hr1G074690.1 HORVU7Hr1G074690	1788.8	2.03	1.35	-0.15	1.02	2.03	1.19	0.28	3.7	1.52	1.19	2.19	-0.15	0.18	0.52	1.35	2.53	3.03	0.68	1.35	0.68	2.36	1.02	0.68	1.02	2.86	2.19	1.52	1.52	0.28	2.36	1.02	0.35	2.36	1.86	1.52	-0.17	0.01	1.69	2.7
	High	Selected	NPEEIPWGEAGADYVVESTGVFTDKDKAAAHLK		4.09338e-05	0.000414347	2	301	HORVU7Hr1G074690.1 HORVU7Hr1G074690	3544.72	1.36	1.5	1.08	2.77	2.07	1.78	1.78	2.07	0.37	1.36	0.09	1.5	1.36	0.94	1.5	2.21	1.93	0.09	2.35	0.37	0.37	4.32	1.5	1.5	1.22	1.36	0.23	1.22	1.93	-0.19	2.35	1.22	0.66	-0.33	1.22	2.63	1.93	1.36	-0.9
	High	Unambiguous	VALQSDDVELVAVNDPFITTEYMTYMFK	1xDeamidated [N14]	6.91325e-05	0.000414347	1	7	HORVU7Hr1G074690.1 HORVU7Hr1G074690	3240.54			4.61		6.65	9.08	1.56		3.5		6.74		9.15		7.39	4.61		9.2			8.69		2.85				8.59	2.11						4.02				5.35
	High	Unambiguous	VLPELNGKLTGMSFR		0.000131912	0.000414347	1	27	HORVU7Hr1G074690.1 HORVU7Hr1G074690	1661.9	-1.32	-0.42					-1.5	0.31	0.13			-2.04		-5.83	-4.21				1.21	0.13	-2.04		-1.86		2.83		-0.24		-1.32	-4.39		-5.11	1.93	-2.58	-0.6	-0.78		-2.94	0.13
	High	Unambiguous	VINDNFGIIEGLMTTVHAITATQK	1xOxidation [M13]	4.15258e-05	0.000414347	1	39	HORVU7Hr1G074690.1 HORVU7Hr1G074690	2602.35			0.02		-1.52			0.02	-2.74	-11.51	-2.44	0.67	-2.28	-3.05	-6.43			-4.44	-3.67							-0.9			-4.28	-3.36		-4.18		-1.21	-4.13	-1.21	-6.25	-2.74	-2.45
	High	Unambiguous	AGIALNDHFVK		0.00049783	0.000693743	1	163	HORVU7Hr1G074690.1 HORVU7Hr1G074690	1184.64	-3.7	-6.74	-2.44	-4.21	-1.42	-2.69	-2.94	-2.18	-4.72	-3.7	-3.2	-3.7	-3.45	-3.96	-3.96	-6.49	-2.44	-5.48	-1.42	-3.2	-4.21	-4.21	-2.44	-4.21	-6.99	-4.97	-4.97	-3.45	-4.97	-1.17	-3.96	-5.48	-4.97	-1.42	-4.21	-0.92	-4.21	0.35	-5.48
	High	Unambiguous	IGINGFGR	1xDeamidated [N4]	0.000437482	0.000693743	2	515	HORVU7Hr1G074690.1 HORVU7Hr1G074690; HORVU6Hr1G054520.3 HORVU6Hr1G054520	834.447	-5.64	-2.28	-3	-0.13	-1.56	-1.56	-1.8	-1.08	2.03	-2.28	-2.76	-1.56	0.35	1.07	0.83	-0.13	2.51	-0.61	0.35	1.07	2.03	1.31	4.19	-1.8	-2.04	4.19	-1.32	3.95	2.51	-0.84	-3.48	-1.8	0.59	-2.04	0.11	-1.32	-1.56	2.75	0.35
	High	Unambiguous	IGINGFGR		0.00080533	0.0010159	2	326	HORVU7Hr1G074690.1 HORVU7Hr1G074690; HORVU6Hr1G054520.3 HORVU6Hr1G054520	833.463	-4.19	-3.47	-2.51	-2.27	-2.51	-1.55	-3.95	-0.59	-0.83	-3.95	-3.23	-1.79	-2.51	-0.83	-1.55	-2.99	-0.11	-3.23	0.13	-2.03	0.13	-3.47	0.37	-2.51	-3.71	-1.79	-2.99	-2.75	-8.03	-1.31	-6.83	-4.43	-2.03	-1.55	-0.59	-1.07	-1.55	-0.35	1.57
	High	Selected	LTGMSFRVPTVDVSVVDLTVRTEK		0.00274865	0.00137649	1	51	HORVU7Hr1G074690.1 HORVU7Hr1G074690	2649.43	0.51	-0.7	-0.24	-2.51		-2.21	0.51	0.66	-1.75			-0.09	-1	-1.45	-3.41			-2.51	-1.45	-2.21	-5.07	0.81		0.21	-2.81	-0.7	-0.54	-0.7	0.21	-2.21	-0.54	-1.15	-4.32	-0.24	-2.21	-1.3	-0.24	-2.05	0.66
	High	Unambiguous	LTGMSFR		0.0018256	0.00137649	1	304	HORVU7Hr1G074690.1 HORVU7Hr1G074690	811.413	-5.87	-7.35	-3.9	-5.87	-2.91	-5.13	-5.13	-6.85	-7.35	-7.35	-6.61	-5.87	-3.9	-5.38	-5.38	-8.09	-4.14	-5.13	-5.62	-9.32	-6.11	-6.11	-6.11	-4.88	-2.42	-5.13	-5.87	-4.88	-4.88	-5.13	-7.84	-4.88	-4.88	-2.66	-1.92	-3.4	-8.83	-3.4	-0.45
	High	Unambiguous	IMGYVEEDLVSTDFVGDSR	1xAcetyl [N-Term]; 1xOxidation [M2]	0.00451075	0.00185291	1	26	HORVU7Hr1G074690.1 HORVU7Hr1G074690	2189.99		13.98	9.78	14.07	10.33	11.51	9.32	8.14	12.34	11.7	10.51	8.32	15.81	7.68	11.97	8.41	10.78	7.5	11.15		5.58	7.77	7.31	9.87	12.7	12.52	11.15	7.04	10.78	8.32		13.43	13.71	11.33		8.87		14.16
	High	Unambiguous	VALQSDDVELVAVNDPFITTEYMTYMFK	2xDeamidated [Q4; N14]; 1xOxidation [M]	0.00481182	0.00196055	1	4	HORVU7Hr1G074690.1 HORVU7Hr1G074690	3257.52			14.04		7.77			-0.06	8.23		12.56		10.72		8.6								12.84			7.13		8.69	10.54	10.44		4.18			18.82			8.05
	High	Unambiguous	AASYDDIKK		0.0068404	0.00298926	1	140	HORVU7Hr1G074690.1 HORVU7Hr1G074690	1010.52	-1.17	-0.75	1.33	0.42	-4.13	1.61	-1.04	-1.56	-0.75	-1.17	-0.57	-0.77	-0.77	-1.36	0.22	0.42	-3.14	-3.72	0.14	-1.34	-0.18	-1.56	-1.56	1.33	-1.76	-1.36	-2.35	-1.36	1.8	0.42	-0.77	-1.76	-0.18	-0.57	-0.97	-1.96	-3.42	-1.56	0.22
	High	Unambiguous	DAPMFVVGVNEDKYTSDVNIVSNASCTTNCLAPLAK		0.0109864	0.0038095	1	15	HORVU7Hr1G074690.1 HORVU7Hr1G074690	3786.8	1.3	-1.95	-1.31		-1.31	4.71	0.11	0.59	-3.37	-2.98			5.88		1.7	0.67	-3.85	-3.77	1.54	-1.71	-3.14		-3.29			-5.51	-0.28	-2.26			0.83		-3.37	1.7	-2.42	-0.28	-3.29
	High	Selected	TLLFGEKPVTVFGVRNPEEIPWGEAGADYVVESTGVFTDKDK		0.011388	0.00391291	1	39	HORVU7Hr1G074690.1 HORVU7Hr1G074690	4597.31					1.24	-0.07	2.11	0.15	0.91	-1.05	0.48		-1.59	-1.81	0.91	-0.18	0.48	0.04	-2.35	1.35	0.8	-3	3.96		-3.44	2.65			-1.81	2.65	2.76	0.48	1.89	1.13	-0.83	1.89	0.26	-2.89	-2.79
	High	Unambiguous	VLPELNGK	1xDeamidated [N6]	0.0129589	0.00436389	3	459	HORVU6Hr1G032070.2 HORVU6Hr1G032070; HORVU7Hr1G074690.1 HORVU7Hr1G074690; HORVU6Hr1G054520.3 HORVU6Hr1G054520	870.493	-1.13	1.39	1.39	0.25	0.48	2.54	0.48	1.16	-0.67	1.39	0.48	3	1.62	-0.9	0.93	5.3	-1.36	-0.21	1.85	0.7	-1.36	0.7	1.39	-0.67	1.39	3.46	1.62	-2.28	1.16	-0.67	2.77	0.02	-0.67	1.39	1.85	-0.21	4.15	0.25	3.23
	High	Unambiguous	VLPELNGK		0.0137249	0.00444017	3	273	HORVU6Hr1G032070.2 HORVU6Hr1G032070; HORVU7Hr1G074690.1 HORVU7Hr1G074690; HORVU6Hr1G054520.3 HORVU6Hr1G054520	869.509	2.1	-0.2	2.33	0.03	1.41	2.79	2.56	2.33	-0.2	1.87	1.87	2.79	0.26	1.18	0.26	-0.2	-2.5	0.72	3.02	0.72	-1.12	2.1	1.41	2.1	2.79	1.41	2.56	-1.35	1.64	0.72	0.49	0.49	0.72	-0.66	2.56	2.79	2.1	1.41	-1.35
	High	Unambiguous	SSIFDAK	1xAcetyl [N-Term]	0.0155064	0.00478307	2	5	HORVU7Hr1G074690.1 HORVU7Hr1G074690; HORVU6Hr1G054520.3 HORVU6Hr1G054520	809.404					31.58		26.15	23.43		7.86	29.11	4.15	24.91	-7.21	29.11		27.63	14.78	28.86	-9.19	28.12	30.59	29.61		11.81	-5.23	22.93	19.47	28.62	21.7	29.36		28.37		-0.05		18.49	27.63
	High	Unambiguous	IKIGINGFGR	1xAcetyl [N-Term]; 1xDeamidated [N6]	0.0153955	0.00478307	2	1	HORVU7Hr1G074690.1 HORVU7Hr1G074690; HORVU6Hr1G054520.3 HORVU6Hr1G054520	1117.64	-4.54	-2.39		-3.47				6.47					-1.86				-1.86							-1.86	21.77			-4.38				-2.66
	High	Unambiguous	IGINGFGR	1xAcetyl [N-Term]	0.0159582	0.00478307	2	8	HORVU7Hr1G074690.1 HORVU7Hr1G074690; HORVU6Hr1G054520.3 HORVU6Hr1G054520	875.473	8.16	22.55	21.41	22.33				-2.12			20.27		18.44		8.16	-1.66				10.68	17.07	-17.42	-6.46	9.3			-0.75	23.47	-0.29	0.17	-6				-14.68		8.85
	High	Unambiguous	LTGMSFR	1xAcetyl [N-Term]	0.0308903	0.00817953	1	9	HORVU7Hr1G074690.1 HORVU7Hr1G074690	853.424			2.66	-1.32	-9.52						-1.55	6.88			3.13				-3.66		-6.01	-5.54								1.73			4.3	1.96		-0.85		-3.2
TRUE	High	Master Protein	HORVU5Hr1G113180.1 HORVU5Hr1G113180	chr5H:641062369-641066702 HC_G|Heat shock 70 kDa protein 3|none|PF00012|IPR013126, IPR018181, IPR029047, IPR029048	0	59	35	5797	13	1	648	71.2	5.21	256.7	385.52	552	358.83	464.02	287.95	406.72	260.02	361.19	346.62	410.02	175.48	287.44	242.13	347.17	324.7	382.59	303.16	409.96	323.14	394.8	366.13	474.92	390.19	241.89	335.32	301.96	390.99	358.91	461.49	276.08	343.7	266.76	399.12	283.5	427.41
	Confidence	PSM Ambiguity	Sequence	Modifications	Qvality PEP	Qvality q-value	# Proteins	# PSMs	Master Protein Accessions	Theo. MH+ [Da]	DeltaM [ppm] (by Search Engine): A Sequest HT	DeltaM [ppm] (by Search Engine): AA Sequest HT	DeltaM [ppm] (by Search Engine): AB Sequest HT	DeltaM [ppm] (by Search Engine): AC Sequest HT	DeltaM [ppm] (by Search Engine): AD Sequest HT	DeltaM [ppm] (by Search Engine): AE Sequest HT	DeltaM [ppm] (by Search Engine): AF Sequest HT	DeltaM [ppm] (by Search Engine): AG Sequest HT	DeltaM [ppm] (by Search Engine): AH Sequest HT	DeltaM [ppm] (by Search Engine): AI Sequest HT	DeltaM [ppm] (by Search Engine): AJ Sequest HT	DeltaM [ppm] (by Search Engine): AK Sequest HT	DeltaM [ppm] (by Search Engine): AL Sequest HT	DeltaM [ppm] (by Search Engine): AM Sequest HT	DeltaM [ppm] (by Search Engine): AN Sequest HT	DeltaM [ppm] (by Search Engine): AO Sequest HT	DeltaM [ppm] (by Search Engine): AP Sequest HT	DeltaM [ppm] (by Search Engine): AQ Sequest HT	DeltaM [ppm] (by Search Engine): AR Sequest HT	DeltaM [ppm] (by Search Engine): AS Sequest HT	DeltaM [ppm] (by Search Engine): AT Sequest HT	DeltaM [ppm] (by Search Engine): AU Sequest HT	DeltaM [ppm] (by Search Engine): AV Sequest HT	DeltaM [ppm] (by Search Engine): B Sequest HT	DeltaM [ppm] (by Search Engine): C Sequest HT	DeltaM [ppm] (by Search Engine): D Sequest HT	DeltaM [ppm] (by Search Engine): E Sequest HT	DeltaM [ppm] (by Search Engine): F Sequest HT	DeltaM [ppm] (by Search Engine): G Sequest HT	DeltaM [ppm] (by Search Engine): H Sequest HT	DeltaM [ppm] (by Search Engine): I Sequest HT	DeltaM [ppm] (by Search Engine): J Sequest HT	DeltaM [ppm] (by Search Engine): K Sequest HT	DeltaM [ppm] (by Search Engine): L Sequest HT	DeltaM [ppm] (by Search Engine): M Sequest HT	DeltaM [ppm] (by Search Engine): N Sequest HT	DeltaM [ppm] (by Search Engine): O Sequest HT	DeltaM [ppm] (by Search Engine): P Sequest HT	DeltaM [ppm] (by Search Engine): Q Sequest HT
	High	Unambiguous	TTPSYVAFTDSER		3.45081e-08	0	3	382	HORVU5Hr1G113180.1 HORVU5Hr1G113180; HORVU5Hr1G021300.3 HORVU5Hr1G021300; HORVU6Hr1G081460.2 HORVU6Hr1G081460	1473.69	0.89	-0.88	1.57	1.84	-1.42	1.3	1.02	0.75	0.62	2.38	2.25	0.35	0.07	2.25	0.89	0.07	-0.74	-0.2	3.33	1.16	2.92	-0.06	0.89	-0.6	-0.06	-1.69	-2.5	-1.69	-0.2	1.43	1.3	0.07	0.62	0.21	2.65	1.16	1.3	1.97	-0.6
	High	Unambiguous	IINEPTAAAIAYGLDKK		1.0437e-14	0	7	333	HORVU4Hr1G059260.3 HORVU4Hr1G059260; HORVU5Hr1G113180.1 HORVU5Hr1G113180; HORVU4Hr1G059390.1 HORVU4Hr1G059390; HORVU3Hr1G086500.1 HORVU3Hr1G086500; HORVU5Hr1G021300.3 HORVU5Hr1G021300; HORVU6Hr1G081460.2 HORVU6Hr1G081460; HORVU1Hr1G072220.4 HORVU1Hr1G072220	1787.99	2.95	1.77	3.45	0.43	1.1	3.28	0.77	0.6	0.1	2.28	1.77	0.6	1.77	2.61	1.44	2.95	1.94	2.78	2.44	0.77	7.31	1.77	2.28	2.28	3.95	1.27	4.12	-0.58	1.94	3.12	-0.41	1.94	2.28	2.61	-0.58	-0.91	0.93	-0.58	0.43
	High	Unambiguous	LINEPTAAAIAYGLDK		6.29505e-09	0	11	438	HORVU4Hr1G059260.3 HORVU4Hr1G059260; HORVU5Hr1G113180.1 HORVU5Hr1G113180; HORVU4Hr1G059390.1 HORVU4Hr1G059390; HORVU2Hr1G122780.2 HORVU2Hr1G122780; HORVU3Hr1G086500.1 HORVU3Hr1G086500; HORVU6Hr1G008880.1 HORVU6Hr1G008880; HORVU5Hr1G021300.3 HORVU5Hr1G021300; HORVU6Hr1G081460.2 HORVU6Hr1G081460; HORVU1Hr1G072220.4 HORVU1Hr1G072220	1659.9	-0.78	0.43	-3.91	-3.31	-1.5	-1.38	-0.9	-0.9	-0.05	-0.66	1.63	-3.19	-2.46	-1.02	0.43	0.07	0.19	-0.05	-0.05	-0.9	1.39	1.15	-0.9	-0.17	-0.42	-1.02	-0.29	-1.26	-0.17	-0.42	-0.54	-2.46	-0.66	-0.66	-0.17	-1.98	-1.14	0.07	-0.17
	High	Unambiguous	VQQLLQDFFNGKELCK		8.86823e-10	0	8	215	HORVU4Hr1G059260.3 HORVU4Hr1G059260; HORVU5Hr1G113180.1 HORVU5Hr1G113180; HORVU4Hr1G059390.1 HORVU4Hr1G059390; HORVU3Hr1G086500.1 HORVU3Hr1G086500; HORVU5Hr1G021300.3 HORVU5Hr1G021300; HORVU6Hr1G081460.2 HORVU6Hr1G081460; HORVU1Hr1G072220.4 HORVU1Hr1G072220	1909.98	-2.46	0.21	-0.1	0.52	-1.05	-0.1	-0.1	-0.1	-2.15	-1.67	-1.52	-2.77	0.52	-3.72	0.37	0.84	-0.57	-0.57	0.21	-1.05	-2.62	3.19	-0.73	-0.42	0.37	-2.15	-1.05	0.84	-0.42	-0.73	0.21	-2.77	-2.77	-2.3	-1.52	0.21	1	-1.05	-3.09
	High	Unambiguous	EQVFSTYSDNQPGVLIQVFEGER		2.06356e-18	0	1	503	HORVU5Hr1G113180.1 HORVU5Hr1G113180	2642.27	1.61	0.7	0.25	0.7	1.16	-0.2	0.36	1.84	1.61	0.82	0.7	1.5	2.18	0.14	2.18	0.25	0.7	0.82	-2.59	1.16	-1.23	0.93	1.73	1.04	0.02	0.7	2.41	1.16	1.16	0.82	0.82	1.39	0.25	1.5	0.59	-0.54	0.59	0.25	0.7
	High	Unambiguous	MYQGAGADMPGGMDDDVPAASGGAGPKIEEVD		7.94512e-15	0	1	200	HORVU5Hr1G113180.1 HORVU5Hr1G113180	3108.32	2.3	0.47	0.85	2.11	-0.88	3.94	0.18	0.56	-0.4	0.56	0.28		-0.79	-0.01	0.85	4.23	-2.04	1.05	1.43	0.66	8.09	0.47	0.56	0.76	3.75	-0.01	2.4	1.24	0.37	1.53	0.28	-0.11	1.53	0.66	0.95	0.18	0.85	0.85	0.18
	High	Unambiguous	NAVVTVPAYFNDSQR		9.61502e-09	0	7	816	HORVU4Hr1G059260.3 HORVU4Hr1G059260; HORVU5Hr1G113180.1 HORVU5Hr1G113180; HORVU4Hr1G059390.1 HORVU4Hr1G059390; HORVU3Hr1G086500.1 HORVU3Hr1G086500; HORVU5Hr1G021300.3 HORVU5Hr1G021300; HORVU6Hr1G081460.2 HORVU6Hr1G081460; HORVU1Hr1G072220.4 HORVU1Hr1G072220	1680.83	1.75	0.14	1.39	0.5	2.1	3.18	0.14	-0.04	0.32	2.64	0.14	1.03	-1.11	2.46	0.5	1.21	0.5	0.32	2.64	1.21	6.92	0.5	1.75	-0.57	1.21	0.32	3.53	1.57	0.68	2.1	0.5	3	1.03	1.75	0.86	1.57	1.39	1.39	-0.75
	High	Unambiguous	NSLENYAYNMR		3.2349e-08	0	1	258	HORVU5Hr1G113180.1 HORVU5Hr1G113180	1374.61	2.8	-0.55	1.78	1.2	0.33	1.93	0.33	0.91	-0.26	1.64	1.78	1.49	2.36	-0.69	2.36	0.91	-0.69	-0.26	1.2	2.22	2.22	0.18	0.62	0.76	-0.4	-0.69	-1.57	1.05	-0.55	1.78	0.91	-1.57	0.47	-0.98	1.2	0.33	0.18	0.04	1.34
	High	Unambiguous	NQVAMNPINTVFDAK		4.26403e-10	0	4	341	HORVU5Hr1G113180.1 HORVU5Hr1G113180; HORVU4Hr1G059390.1 HORVU4Hr1G059390; HORVU5Hr1G021300.3 HORVU5Hr1G021300; HORVU6Hr1G081460.2 HORVU6Hr1G081460	1661.83	0.82	1.42	-0.63	1.06	0.21	-0.03	-0.51	-0.63	0.46	0.34	0.21	0.21	-0.03	-3.03	0.21	-0.63	0.09	0.82	1.78	2.02	0.7	0.21	-0.15	2.5	-0.03	-0.15	-0.63	0.94	-1.59	0.46	0.46	0.58	0.21	-0.27	0.34	-0.27	-0.39	1.3	1.9
	High	Unambiguous	NQVAMNPINTVFDAKR		6.82277e-12	0	4	203	HORVU5Hr1G113180.1 HORVU5Hr1G113180; HORVU4Hr1G059390.1 HORVU4Hr1G059390; HORVU5Hr1G021300.3 HORVU5Hr1G021300; HORVU6Hr1G081460.2 HORVU6Hr1G081460	1817.93	1.85	1.36	1.36	2.02	1.36	0.37	0.2	2.35	2.18	1.19	1.52	0.04	0.04	0.86	0.04	1.03	2.84	1.69	0.86	1.19	2.18	2.02	1.69	2.35	2.18	0.86	1.36	0.2	-1.61	1.19	1.19	2.51	1.69	1.52	-0.46	0.04	0.2	2.02	2.02
	High	Unambiguous	ATAGDTHLGGEDFDNR		5.78633e-08	0	6	417	HORVU5Hr1G113180.1 HORVU5Hr1G113180; HORVU4Hr1G059390.1 HORVU4Hr1G059390; HORVU3Hr1G086500.1 HORVU3Hr1G086500; HORVU5Hr1G021300.3 HORVU5Hr1G021300; HORVU6Hr1G081460.2 HORVU6Hr1G081460; HORVU1Hr1G072220.4 HORVU1Hr1G072220	1675.73	3.93	3.03	0.35	2.49	0.88	1.24	1.24	2.49	2.49	-0.01	2.67	1.24	0.7	0.53	1.06	2.49	-0.01	0.17	2.32	1.06	3.03	1.6	1.96	0.88	1.96	1.96	0.7	1.78	2.67	0.88	2.14	-0.37	1.96	1.42	1.6	-0.55	1.6	-0.37	1.96
	High	Unambiguous	TLSSTAQTTIEIDSLFEGVDFYSTITR	1xDeamidated [Q7]	4.43653e-08	0	1	66	HORVU5Hr1G113180.1 HORVU5Hr1G113180	2996.46	-0.98		8.54	-6.88	10.84			0.13		-3.48	7.94		7.13	1.43	8.04		9.24		9.23		-1.78	7.84	6.83	10.24			4.63	7.33		9.14	4.03	11.24	3.43	8.74			31.66	8.64
	High	Unambiguous	TLSSTAQTTIEIDSLFEGVDFYSTITR		1.38662e-08	0	1	11	HORVU5Hr1G113180.1 HORVU5Hr1G113180	2995.48			3.04		-9.08										7.54		-9.08		8.04				0.43			-1.17												-8.68
	High	Selected	SINPDEAVAYGAAVQAAILSGEGNEK		9.03794e-19	0	6	128	HORVU5Hr1G113180.1 HORVU5Hr1G113180; HORVU3Hr1G086500.1 HORVU3Hr1G086500; HORVU5Hr1G021300.3 HORVU5Hr1G021300; HORVU6Hr1G081460.2 HORVU6Hr1G081460; HORVU1Hr1G072220.4 HORVU1Hr1G072220	2574.27	3.48			-0.02	1.96	-0.14	0.91	1.06	1.38	1.03	0.21	4.71	0.21	0.33	1.26	1.26	0.91	0.21	0.91	1.21	-1.42	1.49	1.26	0.91	0.33	1.84	1.38	1.73	1.49	-0.49	0.56	0.21		2.08	-0.25	1.14	-0.11	0.21	-3.29
	High	Unambiguous	NSLENYAYNMR	1xOxidation [M10]	4.55022e-06	0.000341594	1	10	HORVU5Hr1G113180.1 HORVU5Hr1G113180	1390.61		-2.35		0.24	0.38			-1.77		-0.48	2.54		9.25		4.55	-3.64		3.98		-2.49	-3.5		0.24	-3.21	2.25		-3.36		0.96				1.26	0.82	3.69	-2.64			2.25
	High	Unambiguous	FADAPVQSDIK		2.15665e-06	0.000341594	1	164	HORVU5Hr1G113180.1 HORVU5Hr1G113180	1190.61	-1.05	-1.39	0.79	1.47	0.12	0.46	0.63	-0.89	-0.55	-1.39	-0.21	0.63	1.13	-1.39	-0.05	1.47	-1.73	0.63	1.3	0.29	-1.39	-0.38	-0.55	0.29	1.3	0.96	-1.56	-0.05	0.46	-1.56	-0.21	-0.72	-0.05	-0.38	0.79	-1.89	1.8	0.12	2.31
	High	Unambiguous	DAGVIAGLNVMR		2.95776e-06	0.000341594	3	72	HORVU4Hr1G059260.3 HORVU4Hr1G059260; HORVU5Hr1G113180.1 HORVU5Hr1G113180; HORVU3Hr1G086500.1 HORVU3Hr1G086500	1215.65		9.98	-12.09	-9.13	7.33	1.73		7	2.88	2.72	-8.3	-1.56	-1.23	0.75	0.09	-1.06		-2.71	-0.08	-2.87	6.01	-0.24	8.5	5.85	-9.46	2.23			-0.41	-12.91	-1.56	-1.06	0.25	0.42	0.25	-0.24	1.07	1.4	2.88
	High	Unambiguous	VQQLLQDFFNGK		2.50757e-06	0.000341594	9	58	HORVU4Hr1G059260.3 HORVU4Hr1G059260; HORVU5Hr1G113180.1 HORVU5Hr1G113180; HORVU4Hr1G059390.1 HORVU4Hr1G059390; HORVU3Hr1G086500.1 HORVU3Hr1G086500; HORVU5Hr1G021300.3 HORVU5Hr1G021300; HORVU6Hr1G081460.2 HORVU6Hr1G081460; HORVU1Hr1G072220.4 HORVU1Hr1G072220	1436.75				-0.92	-0.5	-2.17	-1.75			-1.89	-2.17		-1.89	-0.22	-1.89	0.06	-1.75	-0.92	-1.06			-1.47	-2.45		-1.75	-2.45	-3		-2.45	-2.31			-2.45	-2.45	-2.87	-2.45	-2.45	-2.31
	High	Unambiguous	VEIIANDQGNR		3.00619e-05	0.000414347	12	112	HORVU5Hr1G113180.1 HORVU5Hr1G113180; HORVU4Hr1G059390.1 HORVU4Hr1G059390; HORVU2Hr1G122780.2 HORVU2Hr1G122780; HORVU3Hr1G086500.1 HORVU3Hr1G086500; HORVU6Hr1G008880.1 HORVU6Hr1G008880; HORVU5Hr1G021300.3 HORVU5Hr1G021300; HORVU6Hr1G081460.2 HORVU6Hr1G081460; HORVU1Hr1G072220.4 HORVU1Hr1G072220; HORVU5Hr1G078400.1 HORVU5Hr1G078400	1228.63	1.37	2.35	-4	-0.09	-3.02	0.07	-1.56	-0.75	0.23	0.72	-1.72	1.7	-0.09	-0.91	-0.75	-0.09	-1.72	-4.65	-3.02	-0.58	-0.42	-0.09	1.86		0.39	-0.26	-5.63	-2.37	0.56	-2.21	1.53	-3.19	0.88	-0.26	4.14	-1.07	-0.75	-3.84	2.51
	High	Unambiguous	ARFEELNMDLFR		8.39196e-05	0.000414347	7	125	HORVU4Hr1G059260.3 HORVU4Hr1G059260; HORVU5Hr1G113180.1 HORVU5Hr1G113180; HORVU4Hr1G059390.1 HORVU4Hr1G059390; HORVU3Hr1G086500.1 HORVU3Hr1G086500; HORVU2Hr1G112630.2 HORVU2Hr1G112630; HORVU1Hr1G072220.4 HORVU1Hr1G072220	1540.76	2.9	7.38	0.96	3.29	4.46	5.24	2.51	2.32	0.96	2.71	-0.21	1.74	-0.8	1.35	0.96	9.52	0.76	1.54	1.74	2.71	-0.41	3.49	2.12	2.32	1.54	-0.41	4.46	2.71	-0.6	3.1	1.15	1.54	-0.41	-0.02		1.15	10.69	6.6	1.15
	High	Unambiguous	MVNHFVQEFK		9.95116e-06	0.000414347	8	264	HORVU4Hr1G059260.3 HORVU4Hr1G059260; HORVU5Hr1G113180.1 HORVU5Hr1G113180; HORVU4Hr1G059390.1 HORVU4Hr1G059390; HORVU3Hr1G086500.1 HORVU3Hr1G086500; HORVU5Hr1G021300.3 HORVU5Hr1G021300; HORVU6Hr1G081460.2 HORVU6Hr1G081460; HORVU1Hr1G072220.4 HORVU1Hr1G072220	1278.63	0.23	-0.01	1.17	2.34	1.64	0.93	1.87	4.22	0.93	0.46	0.46	0.93	0.46	2.11	2.11	-0.24	2.34	0.7	2.81	3.75	1.4	0.23	2.81	1.17	-1.18	1.17	0.23	-0.01	0.7	3.28	3.51	-0.01	0.46	1.17	1.87	1.17	1.4	2.81	1.64
	High	Unambiguous	MYQGAGADMPGGMDDDVPAASGGAGPK		2.98469e-05	0.000414347	1	4	HORVU5Hr1G113180.1 HORVU5Hr1G113180	2523.06						4.77	3.43	3.31	0.22									0.89					-0.62
	High	Unambiguous	MYQGAGADMPGGMDDDVPAASGGAGPKIEEVD	1xDeamidated [Q3]	3.25321e-05	0.000414347	1	8	HORVU5Hr1G113180.1 HORVU5Hr1G113180	3109.31	9.44	5.09	6.64		2.97					10.4	6.25		6.54		7.02	9.24		10.4			13.68	6.54		8.47				3.74		4.03	8.95		5.09		8.57			7.31	8.95
	High	Unambiguous	FADAPVQSDIKMWPYK		2.56699e-05	0.000414347	1	5	HORVU5Hr1G113180.1 HORVU5Hr1G113180	1895.94		0.32	0.48			8.38																		-5.65				-2.68					-5.02						-0.06
	High	Unambiguous	VQQLLQDFFNGKELCK	1xDeamidated [Q/N]	9.60029e-06	0.000414347	8	81	HORVU4Hr1G059260.3 HORVU4Hr1G059260; HORVU5Hr1G113180.1 HORVU5Hr1G113180; HORVU4Hr1G059390.1 HORVU4Hr1G059390; HORVU3Hr1G086500.1 HORVU3Hr1G086500; HORVU5Hr1G021300.3 HORVU5Hr1G021300; HORVU6Hr1G081460.2 HORVU6Hr1G081460; HORVU1Hr1G072220.4 HORVU1Hr1G072220	1910.97	0.52	-1.84	-0.74	-2.47	-4.04	1.14	0.99	-2.15	-4.35	-1.21	-3.72	-0.11	-0.74	-0.9	-1.37	0.83	-0.9	-2	0.2	-1.05	-2.62	1.14	-0.27	-2.47	-0.11	-1.84	-0.9	-1.37	-0.58	-2.47	-2.62	-0.11	-4.98	-4.19	-2.62	-3.09	0.52	-2.94	-1.21
	High	Selected	SINPDEAVAYGAAVQAAILSGEGNEK	1xDeamidated [Q15]	1.49827e-05	0.000414347	6	4	HORVU5Hr1G113180.1 HORVU5Hr1G113180; HORVU3Hr1G086500.1 HORVU3Hr1G086500; HORVU5Hr1G021300.3 HORVU5Hr1G021300; HORVU6Hr1G081460.2 HORVU6Hr1G081460; HORVU1Hr1G072220.4 HORVU1Hr1G072220	2575.25				1.69	-1.89	3.24	1.72				-2.01	2.47				2.19	4.49		4.62	4.18	7.19						8.89		8.83			8.58	7.28	6.04		8.27		4.95
	High	Unambiguous	STIHDVVLVGGSTR		6.34262e-05	0.000414347	1	42	HORVU5Hr1G113180.1 HORVU5Hr1G113180	1440.78	-2.69			-0.19	-1.65	0.44	-2.48	-4.35		-2.27	-3.52					-1.65	0.44	-1.44	-0.81	0.44	-1.65	-1.23	-0.4						0.23	-2.48	-1.23		-0.19	-2.06		0.44		-1.44	-3.73
	High	Unambiguous	FEELNMDLFR		0.000134784	0.000414347	7	14	HORVU4Hr1G059260.3 HORVU4Hr1G059260; HORVU5Hr1G113180.1 HORVU5Hr1G113180; HORVU4Hr1G059390.1 HORVU4Hr1G059390; HORVU3Hr1G086500.1 HORVU3Hr1G086500; HORVU2Hr1G112630.2 HORVU2Hr1G112630; HORVU1Hr1G072220.4 HORVU1Hr1G072220	1313.62						2.19	0.21		-0.25	2.95				2.49	1.73	3.1							8.13							4.32	4.17		5.99		4.47		3.1
	High	Unambiguous	QATKDAGVIAGLNVMR		6.90026e-06	0.000414347	3	18	HORVU4Hr1G059260.3 HORVU4Hr1G059260; HORVU5Hr1G113180.1 HORVU5Hr1G113180; HORVU3Hr1G086500.1 HORVU3Hr1G086500	1643.89		0.24	-0.49			2.43	-1.04									1.7	-1.04		0.61		2.8	1.15		0.24				0.24	-0.67	-1.22							2.07	-2.13	-0.85
	High	Unambiguous	ITITNDKGR		9.08154e-05	0.000414347	8	327	HORVU4Hr1G059260.3 HORVU4Hr1G059260; HORVU5Hr1G113180.1 HORVU5Hr1G113180; HORVU4Hr1G059390.1 HORVU4Hr1G059390; HORVU3Hr1G086500.1 HORVU3Hr1G086500; HORVU5Hr1G021300.3 HORVU5Hr1G021300; HORVU6Hr1G081460.2 HORVU6Hr1G081460; HORVU1Hr1G072220.4 HORVU1Hr1G072220	1017.57	-7.95	-0.87	-3.53	-7.95	-1.17	-4.11	-4.41	-4.7	-3.82	-4.41	-4.11	-1.76	-2.94	-2.35	-4.41	-0.58	-3.82	-8.54	-3.82	-4.7	-3.23	-4.7	-6.18	-1.46	-9.72	-5.29	-4.7	-3.53	-1.76	-7.06	-8.54	-5.59	-3.82	-5	-2.05	-3.23	-3.23	-1.46	-4.7
	High	Unambiguous	ATAGDTHLGGEDFDNRMVNHFVQEFK		0.00034028	0.000693743	6	3	HORVU5Hr1G113180.1 HORVU5Hr1G113180; HORVU4Hr1G059390.1 HORVU4Hr1G059390; HORVU3Hr1G086500.1 HORVU3Hr1G086500; HORVU5Hr1G021300.3 HORVU5Hr1G021300; HORVU6Hr1G081460.2 HORVU6Hr1G081460; HORVU1Hr1G072220.4 HORVU1Hr1G072220	2935.34	1.06	2.08	1.23	9.88															7.7					1.74				2.93			9.33
	High	Unambiguous	NVLIFDLGGGTFDVSLLTIEEGIFEVK		0.000583005	0.000693743	7	4	HORVU4Hr1G059260.3 HORVU4Hr1G059260; HORVU5Hr1G113180.1 HORVU5Hr1G113180; HORVU4Hr1G059390.1 HORVU4Hr1G059390; HORVU3Hr1G086500.1 HORVU3Hr1G086500; HORVU5Hr1G021300.3 HORVU5Hr1G021300; HORVU6Hr1G081460.2 HORVU6Hr1G081460; HORVU1Hr1G072220.4 HORVU1Hr1G072220	2925.55
	High	Unambiguous	EQVFSTYSDNQPGVLIQVFEGER	1xDeamidated [Q/N]	0.000653969	0.000693743	1	7	HORVU5Hr1G113180.1 HORVU5Hr1G113180	2643.26				16.43	1.04	0.24	2.06					9.31							8.86		4.17	4.33	0.02					6.21				8.63	7.65
	High	Unambiguous	NAVVTVPAYFNDSQR	1xDeamidated [Q/N]	0.000890478	0.00115556	7	30	HORVU4Hr1G059260.3 HORVU4Hr1G059260; HORVU5Hr1G113180.1 HORVU5Hr1G113180; HORVU4Hr1G059390.1 HORVU4Hr1G059390; HORVU3Hr1G086500.1 HORVU3Hr1G086500; HORVU5Hr1G021300.3 HORVU5Hr1G021300; HORVU6Hr1G081460.2 HORVU6Hr1G081460; HORVU1Hr1G072220.4 HORVU1Hr1G072220	1681.82		1.6	0.65	-1.01	0.89	3.39		1.49		1.01	-7.9					-9.5	1.13	-6.11	0.18	0.18	9.33	34.92	-8.97			-8.79	5.41		0.41	-7.9	2.2	-9.86					-9.86		-0.42
	High	Unambiguous	MDKSTIHDVVLVGGSTR		0.00143021	0.00137649	1	22	HORVU5Hr1G113180.1 HORVU5Hr1G113180	1814.94	0.92	0.48	-1.07	0.7		0.92	-0.19	2.68		1.36	0.25			0.7	0.48	0.48		1.14	2.02	4		0.25		1.14		0.92	0.48	0.7	0.48				1.14	0.03			-0.41	0.92
	High	Unambiguous	DAGVIAGLNVMR	1xOxidation [M11]	0.00405025	0.00185291	3	8	HORVU4Hr1G059260.3 HORVU4Hr1G059260; HORVU5Hr1G113180.1 HORVU5Hr1G113180; HORVU3Hr1G086500.1 HORVU3Hr1G086500	1231.65	3.24		-3.58	-1.63	-0.01		4.7			-9.1	2.45		-4.86	0.15			-6.32	-0.33	-4.86	-4.07		-6.57		-9.24	8.92	5.51		-7.15	-0.66			-4.86		1.94	-5.2	0.32	-0.33	2.1	7.62
	High	Unambiguous	TTPSYVAFTDSERLIGDAAK		0.00812661	0.00300571	3	3	HORVU5Hr1G113180.1 HORVU5Hr1G113180; HORVU5Hr1G021300.3 HORVU5Hr1G021300; HORVU6Hr1G081460.2 HORVU6Hr1G081460	2142.07		-0.14	0.28																				-2.8										-3.22	6.34
	High	Unambiguous	NTTIPTKK		0.00750954	0.00300571	14	130	HORVU4Hr1G059260.3 HORVU4Hr1G059260; HORVU5Hr1G113180.1 HORVU5Hr1G113180; HORVU4Hr1G059390.1 HORVU4Hr1G059390; HORVU3Hr1G086500.1 HORVU3Hr1G086500; HORVU3Hr1G073230.1 HORVU3Hr1G073230; HORVU5Hr1G021300.3 HORVU5Hr1G021300; HORVU4Hr1G012460.1 HORVU4Hr1G012460; HORVU4Hr1G089090.2 HORVU4Hr1G089090; HORVU6Hr1G081460.2 HORVU6Hr1G081460; HORVU1Hr1G072220.4 HORVU1Hr1G072220	902.531	1.29	-1.15	-2.48	-1.37	-2.48	-0.26	-0.92	-2.92	-1.81	-2.48	-4.69	-2.92	-5.36	-2.7	-4.25	-1.59	-2.03	-0.7	-1.37	0.63	-2.7	-1.59	-2.25	-2.25	0.18	-3.81	-0.92	-2.7	-1.59	-3.81	-0.26	0.18	-3.14	-2.7	-1.12	-4.47	-0.92	-3.14	1.29
	High	Selected	NTTIPTKKEQVFSTYSDNQPGVLIQVFEGER		0.00911579	0.00309659	1	4	HORVU5Hr1G113180.1 HORVU5Hr1G113180	3525.79		0.5	1.64
	High	Unambiguous	NQVAMNPINTVFDAKR	1xOxidation [M5]	0.010299	0.00361969	4	8	HORVU5Hr1G113180.1 HORVU5Hr1G113180; HORVU4Hr1G059390.1 HORVU4Hr1G059390; HORVU5Hr1G021300.3 HORVU5Hr1G021300; HORVU6Hr1G081460.2 HORVU6Hr1G081460	1833.93		-0.35	-0.52	1.77	3.08	-0.02	0.14		-3.13				0.63		-0.35	7.01		4.56	-0.84		2.59				2.43		3.9		2.59	2.27						0.14	0.3	0.63
	High	Unambiguous	MYQGAGADMPGGMDDDVPAASGGAGPKIE		0.0111453	0.0038095	1	29	HORVU5Hr1G113180.1 HORVU5Hr1G113180	2765.19			0.44		2.06	2.61	-1.63		-1.41	0.54	0.54		-0.32		4.45	1.74	0.76	0.76	2.82	2.61	6.73	2.06	0.11	-0.65	1.74	0.87	2.06	0.76		-0.21	0.87	0.33	1.09	0.44	-0.54	0.44	1.2	-0.76	-3.25
	High	Unambiguous	VQDLLLLDVTPLSLGLETAGGVMTVLITR		0.0136267	0.00436389	1	6	HORVU5Hr1G113180.1 HORVU5Hr1G113180	3037.72													-1.12				-1.02												4.81	0.98		4.8		-5.56
	High	Unambiguous	EQVFSTYSDNQPGVLIQVFEGER	1xAcetyl [N-Term]	0.0157307	0.00478307	1	10	HORVU5Hr1G113180.1 HORVU5Hr1G113180	2684.28			18.66		-2.35	2.57	3.46			-6.6	1.67				5.36			4.69			3.8		-10.28	6.59	5.47			5.7		6.37			-3.8	0.89				-3.02	-1.23
	High	Unambiguous	MYQGAGADMPGGMDDDVPAASGGAGPKIEEVD	1xDeamidated [Q3]; 1xOxidation [M]	0.0148527	0.00478307	1	2	HORVU5Hr1G113180.1 HORVU5Hr1G113180	3125.3			1.29						3.02				10.5		9.45					13.19				5.7						12.71		7.72	-4.18	7.82				7.53
	High	Unambiguous	RTLSSTAQTTIEIDSLFEGVDFYSTITR	1xDeamidated [Q8]	0.0200795	0.00590674	1	2	HORVU5Hr1G113180.1 HORVU5Hr1G113180	3152.56			1.07	-3.88	7.54					2.69			4.21	-4.26							0.33	-0.36	5.83	0.9			0.69	3.56	0.52	6.78
	High	Unambiguous	MYQGAGADMPGGMDDDVPAASGGAGPKIE	1xDeamidated [Q3]	0.0203699	0.00608222	1	2	HORVU5Hr1G113180.1 HORVU5Hr1G113180	2766.17		5.2				7.8		0.32									6.83	10.41	8.67	9.65	15.53				7.48	8.89			8.46
	High	Unambiguous	DISGNPR		0.0261886	0.00709161	8	129	HORVU4Hr1G059260.3 HORVU4Hr1G059260; HORVU5Hr1G113180.1 HORVU5Hr1G113180; HORVU4Hr1G059390.1 HORVU4Hr1G059390; HORVU3Hr1G086500.1 HORVU3Hr1G086500; HORVU5Hr1G021300.3 HORVU5Hr1G021300; HORVU6Hr1G081460.2 HORVU6Hr1G081460; HORVU1Hr1G072220.4 HORVU1Hr1G072220	758.379	-5.83	-1.61	-1.34	-3.72	-2.13	-5.04	-2.66	-4.77	-3.45	-5.56	-6.09	-3.19	-5.83	-6.62	-4.51	-4.77	-4.77	-4.51	-6.35	-2.13	-4.77	-5.83	-6.88	-3.98	-3.45	-5.04	-6.62	-3.98	-3.72	-2.66	-4.51	-2.66	-6.62	-2.93	-3.45	-3.98	-5.04	-2.13	-3.45
TRUE	High	Master Protein	HORVU4Hr1G059260.3 HORVU4Hr1G059260	chr4H:495853476-495855920 HC_G|Heat shock 70 kDa protein 3|none|PF00012|IPR013126, IPR018181, IPR029047, IPR029048	0	55	31	4700	10	1	657	71.8	5.29	178.37	279.78	386.74	250.71	354.9	253.5	332.84	227.45	306.77	265.81	340.28	138.6	232.29	220.99	349.85	309.01	403.27	225.96	284.53	216.34	305.71	246.34	308.34	271.61	190.91	226.06	181.51	250.54	252.82	295.64	195.96	284.73	169.76	317.5	205.17	308.6
	Confidence	PSM Ambiguity	Sequence	Modifications	Qvality PEP	Qvality q-value	# Proteins	# PSMs	Master Protein Accessions	Theo. MH+ [Da]	DeltaM [ppm] (by Search Engine): A Sequest HT	DeltaM [ppm] (by Search Engine): AA Sequest HT	DeltaM [ppm] (by Search Engine): AB Sequest HT	DeltaM [ppm] (by Search Engine): AC Sequest HT	DeltaM [ppm] (by Search Engine): AD Sequest HT	DeltaM [ppm] (by Search Engine): AE Sequest HT	DeltaM [ppm] (by Search Engine): AF Sequest HT	DeltaM [ppm] (by Search Engine): AG Sequest HT	DeltaM [ppm] (by Search Engine): AH Sequest HT	DeltaM [ppm] (by Search Engine): AI Sequest HT	DeltaM [ppm] (by Search Engine): AJ Sequest HT	DeltaM [ppm] (by Search Engine): AK Sequest HT	DeltaM [ppm] (by Search Engine): AL Sequest HT	DeltaM [ppm] (by Search Engine): AM Sequest HT	DeltaM [ppm] (by Search Engine): AN Sequest HT	DeltaM [ppm] (by Search Engine): AO Sequest HT	DeltaM [ppm] (by Search Engine): AP Sequest HT	DeltaM [ppm] (by Search Engine): AQ Sequest HT	DeltaM [ppm] (by Search Engine): AR Sequest HT	DeltaM [ppm] (by Search Engine): AS Sequest HT	DeltaM [ppm] (by Search Engine): AT Sequest HT	DeltaM [ppm] (by Search Engine): AU Sequest HT	DeltaM [ppm] (by Search Engine): AV Sequest HT	DeltaM [ppm] (by Search Engine): B Sequest HT	DeltaM [ppm] (by Search Engine): C Sequest HT	DeltaM [ppm] (by Search Engine): D Sequest HT	DeltaM [ppm] (by Search Engine): E Sequest HT	DeltaM [ppm] (by Search Engine): F Sequest HT	DeltaM [ppm] (by Search Engine): G Sequest HT	DeltaM [ppm] (by Search Engine): H Sequest HT	DeltaM [ppm] (by Search Engine): I Sequest HT	DeltaM [ppm] (by Search Engine): J Sequest HT	DeltaM [ppm] (by Search Engine): K Sequest HT	DeltaM [ppm] (by Search Engine): L Sequest HT	DeltaM [ppm] (by Search Engine): M Sequest HT	DeltaM [ppm] (by Search Engine): N Sequest HT	DeltaM [ppm] (by Search Engine): O Sequest HT	DeltaM [ppm] (by Search Engine): P Sequest HT	DeltaM [ppm] (by Search Engine): Q Sequest HT
	High	Unambiguous	TTPSYVAFTDTER		2.78219e-08	0	3	343	HORVU4Hr1G059260.3 HORVU4Hr1G059260; HORVU4Hr1G059390.1 HORVU4Hr1G059390; HORVU1Hr1G072220.4 HORVU1Hr1G072220	1487.7	0.31	-1.3	0.58	1.25	-0.5	3	-0.23	-0.23	0.58	1.12	1.12	0.58	-0.09	0.31	0.85	0.71	-1.17	1.79	1.65	2.73	2.19	0.04	0.58	0.58	-2.65	-1.84	-1.3	-0.23	-0.23	0.04	2.46	-1.04	0.85	-1.71	0.44	1.38	-0.09	2.06	-0.09
	High	Unambiguous	IINEPTAAAIAYGLDKK		1.0437e-14	0	7	333	HORVU4Hr1G059260.3 HORVU4Hr1G059260; HORVU5Hr1G113180.1 HORVU5Hr1G113180; HORVU4Hr1G059390.1 HORVU4Hr1G059390; HORVU3Hr1G086500.1 HORVU3Hr1G086500; HORVU5Hr1G021300.3 HORVU5Hr1G021300; HORVU6Hr1G081460.2 HORVU6Hr1G081460; HORVU1Hr1G072220.4 HORVU1Hr1G072220	1787.99	2.95	1.77	3.45	0.43	1.1	3.28	0.77	0.6	0.1	2.28	1.77	0.6	1.77	2.61	1.44	2.95	1.94	2.78	2.44	0.77	7.31	1.77	2.28	2.28	3.95	1.27	4.12	-0.58	1.94	3.12	-0.41	1.94	2.28	2.61	-0.58	-0.91	0.93	-0.58	0.43
	High	Unambiguous	LINEPTAAAIAYGLDK		6.29505e-09	0	11	438	HORVU4Hr1G059260.3 HORVU4Hr1G059260; HORVU5Hr1G113180.1 HORVU5Hr1G113180; HORVU4Hr1G059390.1 HORVU4Hr1G059390; HORVU2Hr1G122780.2 HORVU2Hr1G122780; HORVU3Hr1G086500.1 HORVU3Hr1G086500; HORVU6Hr1G008880.1 HORVU6Hr1G008880; HORVU5Hr1G021300.3 HORVU5Hr1G021300; HORVU6Hr1G081460.2 HORVU6Hr1G081460; HORVU1Hr1G072220.4 HORVU1Hr1G072220	1659.9	-0.78	0.43	-3.91	-3.31	-1.5	-1.38	-0.9	-0.9	-0.05	-0.66	1.63	-3.19	-2.46	-1.02	0.43	0.07	0.19	-0.05	-0.05	-0.9	1.39	1.15	-0.9	-0.17	-0.42	-1.02	-0.29	-1.26	-0.17	-0.42	-0.54	-2.46	-0.66	-0.66	-0.17	-1.98	-1.14	0.07	-0.17
	High	Unambiguous	VQQLLQDFFNGKELCK		8.86823e-10	0	8	215	HORVU4Hr1G059260.3 HORVU4Hr1G059260; HORVU5Hr1G113180.1 HORVU5Hr1G113180; HORVU4Hr1G059390.1 HORVU4Hr1G059390; HORVU3Hr1G086500.1 HORVU3Hr1G086500; HORVU5Hr1G021300.3 HORVU5Hr1G021300; HORVU6Hr1G081460.2 HORVU6Hr1G081460; HORVU1Hr1G072220.4 HORVU1Hr1G072220	1909.98	-2.46	0.21	-0.1	0.52	-1.05	-0.1	-0.1	-0.1	-2.15	-1.67	-1.52	-2.77	0.52	-3.72	0.37	0.84	-0.57	-0.57	0.21	-1.05	-2.62	3.19	-0.73	-0.42	0.37	-2.15	-1.05	0.84	-0.42	-0.73	0.21	-2.77	-2.77	-2.3	-1.52	0.21	1	-1.05	-3.09
	High	Unambiguous	VQDLLLLDVTPLSLGLETAGGVMTTLIPR		2.42118e-17	0	2	239	HORVU4Hr1G059260.3 HORVU4Hr1G059260; HORVU1Hr1G072220.4 HORVU1Hr1G072220	3035.71	-3.9	-5.78	-1.13	-2.12	-1.13	1.54	-0.54	-0.84	-0.24	1.14	-1.13	3.22	-0.34	-0.44	-2.02	0.25	-0.05	-1.23	-1.73	-2.91	-1.53	-0.44	-2.22	-6.67	0.35	-1.73	-2.22	1.93	-3.6	0.35	-3.01	-1.03	0.25	-1.82	-2.02	-3.5	-0.93	-3.41	3.31
	High	Unambiguous	EQVFSTYSDNQPGVLIQVYEGER		4.48752e-21	0	6	648	HORVU4Hr1G059260.3 HORVU4Hr1G059260; HORVU4Hr1G059390.1 HORVU4Hr1G059390; HORVU5Hr1G021300.3 HORVU5Hr1G021300; HORVU6Hr1G081460.2 HORVU6Hr1G081460; HORVU1Hr1G072220.4 HORVU1Hr1G072220	2658.27	0.09	0.43	0.77	2.35	0.66	-2.95	-0.7	0.21	-1.71	1.22	-0.13	-0.47	-1.15	1.22	1.79	1.56	-1.37	-0.13	1.11	-0.02	-2.62	-0.7	1.11	0.43	-0.7	-2.05	0.32	-0.36	0.21	0.66	0.77	0.32	-1.15	-0.81	0.09	0.54	-1.37	1.22	-1.26
	High	Unambiguous	EQVFSTYSDNQPGVLIQVYEGER	1xDeamidated [Q/N]	9.09547e-08	0	6	142	HORVU4Hr1G059260.3 HORVU4Hr1G059260; HORVU4Hr1G059390.1 HORVU4Hr1G059390; HORVU5Hr1G021300.3 HORVU5Hr1G021300; HORVU6Hr1G081460.2 HORVU6Hr1G081460; HORVU1Hr1G072220.4 HORVU1Hr1G072220	2659.25		9.52	8.99	1.78	3.13	3.47	2.23	4.15		2.23	2.23		2.79		3.7	2.79	0.88	1.67	6.63	1.78	3.7	2.57	2.91		6.96	7.11	10.12	8.24	4.15	1.78	0.31	0.76	-0.14	10.27	1.33	2.57	1.21	2	6.73
	High	Unambiguous	NALENYAYNMR		3.76835e-07	0	4	346	HORVU4Hr1G059260.3 HORVU4Hr1G059260; HORVU4Hr1G059390.1 HORVU4Hr1G059390; HORVU3Hr1G086500.1 HORVU3Hr1G086500; HORVU1Hr1G072220.4 HORVU1Hr1G072220	1358.62	0.71	-1.2	-0.53	1.44	1.59	1.89	-0.17	0.12	0.14	1.3	1.3	-0.32	-0.47	0.71	-0.53	0.56	0.14	-0.62	0.12	1	-0.75	0.71	0.41	0.14	-1.63	0.14	-0.62	-1.35	-0.76	2.03	0.86	-1.63	-0.62	0.56	-0.03	0.56	-0.32	0.56	0.27
	High	Unambiguous	MYQGAGPGGAAGMDEDMPSGGAGAGGGSGAGPKIEEVD		1.4373e-08	0	1	8	HORVU4Hr1G059260.3 HORVU4Hr1G059260	3408.44		0.07	1.39						0.07						0.33		-1.25							3.5										0.25
	High	Unambiguous	MYQGAGPGGAAGMDEDMPSGGAGAGGGSGAGPK		5.47175e-11	0	1	42	HORVU4Hr1G059260.3 HORVU4Hr1G059260	2823.18				-0.66	1.04	0.19	-1.19	0.19	1.04		0.09		2.96	1.15	3.91	1.26	0.83		3.17	-3.1			2.53	4.66					-1.08	3.17			0.51	-0.98	0.41	0.94	3.17	0.83
	High	Unambiguous	NAVVTVPAYFNDSQR		9.61502e-09	0	7	816	HORVU4Hr1G059260.3 HORVU4Hr1G059260; HORVU5Hr1G113180.1 HORVU5Hr1G113180; HORVU4Hr1G059390.1 HORVU4Hr1G059390; HORVU3Hr1G086500.1 HORVU3Hr1G086500; HORVU5Hr1G021300.3 HORVU5Hr1G021300; HORVU6Hr1G081460.2 HORVU6Hr1G081460; HORVU1Hr1G072220.4 HORVU1Hr1G072220	1680.83	1.75	0.14	1.39	0.5	2.1	3.18	0.14	-0.04	0.32	2.64	0.14	1.03	-1.11	2.46	0.5	1.21	0.5	0.32	2.64	1.21	6.92	0.5	1.75	-0.57	1.21	0.32	3.53	1.57	0.68	2.1	0.5	3	1.03	1.75	0.86	1.57	1.39	1.39	-0.75
	High	Unambiguous	TFSAEEISSMVLTK		7.76664e-08	0	1	121	HORVU4Hr1G059260.3 HORVU4Hr1G059260	1542.77	-1.86	2.42	-0.17	2.68	0.48	-2.24		-0.95	-1.86	1.39	-0.82	1.9	-0.17	2.42	-0.04	0.87	-0.82	-0.56	1.13	0.35	-2.11	0.61	1.13	-1.08	-1.73	-3.15	-1.73	-1.08	-0.56	-0.95		-0.3	-1.6	-2.11	-0.56	1.52	-1.34	1.39	-0.3
	High	Rejected	SINPDEAVAYGAAVQAAILSGEGNQK	1xDeamidated [Q/N]	9.03794e-19	0	1	253	HORVU4Hr1G059260.3 HORVU4Hr1G059260	2574.27	3.48			-0.02	1.96	-0.14	0.91	1.06	1.38	1.03	0.21	4.71	0.21	0.33	1.26	1.26	0.91	0.21	0.91	1.21	-1.42	1.49	1.26	0.91	0.33	1.84	1.38	1.73	1.49	-0.49	0.56	0.21	-0.96	2.08	-0.25	1.14	-0.11	0.21	-3.29
	High	Unambiguous	FSDASVQSDMK		3.17791e-06	0.000341594	1	180	HORVU4Hr1G059260.3 HORVU4Hr1G059260	1214.54	4.89	2.75	2.1	1.44	0.12	2.92	-0.05	0.94	0.12	0.12	2.26	-0.87	0.12	1.11	2.1	1.77	-0.37	0.45	3.41	2.42	2.1	0.61	1.6	1.11	-0.05	0.28	2.92	2.1	3.25	-0.05	0.78	-1.53	0.94	-0.05	1.93	1.27	1.27	-0.7	1.6
	High	Unambiguous	MYQGAGPGGAAGMDEDMPSGGAGAGGGSGAGPK	1xDeamidated [Q3]	4.29625e-06	0.000341594	1	39	HORVU4Hr1G059260.3 HORVU4Hr1G059260	2824.16		7.62	9.64	6.67	4.54	9	4.01	8.26	7.41	7.84	7.73	9.64	7.3	8.47		7.2	9	8.47	9.75	9.64	9.75	5.39	7.62	5.39	5.39	9.22	3.27	8.26	11.02	7.84	7.84	6.03		6.99		4.01	8.47	6.03	8.15
	High	Unambiguous	DAGVIAGLNVMR		2.95776e-06	0.000341594	3	72	HORVU4Hr1G059260.3 HORVU4Hr1G059260; HORVU5Hr1G113180.1 HORVU5Hr1G113180; HORVU3Hr1G086500.1 HORVU3Hr1G086500	1215.65		9.98	-12.09	-9.13	7.33	1.73		7	2.88	2.72	-8.3	-1.56	-1.23	0.75	0.09	-1.06		-2.71	-0.08	-2.87	6.01	-0.24	8.5	5.85	-9.46	2.23			-0.41	-12.91	-1.56	-1.06	0.25	0.42	0.25	-0.24	1.07	1.4	2.88
	High	Unambiguous	VQQLLQDFFNGK		2.50757e-06	0.000341594	9	58	HORVU4Hr1G059260.3 HORVU4Hr1G059260; HORVU5Hr1G113180.1 HORVU5Hr1G113180; HORVU4Hr1G059390.1 HORVU4Hr1G059390; HORVU3Hr1G086500.1 HORVU3Hr1G086500; HORVU5Hr1G021300.3 HORVU5Hr1G021300; HORVU6Hr1G081460.2 HORVU6Hr1G081460; HORVU1Hr1G072220.4 HORVU1Hr1G072220	1436.75				-0.92	-0.5	-2.17	-1.75			-1.89	-2.17		-1.89	-0.22	-1.89	0.06	-1.75	-0.92	-1.06			-1.47	-2.45		-1.75	-2.45	-3		-2.45	-2.31			-2.45	-2.45	-2.87	-2.45	-2.45	-2.31
	High	Unambiguous	ARFEELNMDLFR		8.39196e-05	0.000414347	7	125	HORVU4Hr1G059260.3 HORVU4Hr1G059260; HORVU5Hr1G113180.1 HORVU5Hr1G113180; HORVU4Hr1G059390.1 HORVU4Hr1G059390; HORVU3Hr1G086500.1 HORVU3Hr1G086500; HORVU2Hr1G112630.2 HORVU2Hr1G112630; HORVU1Hr1G072220.4 HORVU1Hr1G072220	1540.76	2.9	7.38	0.96	3.29	4.46	5.24	2.51	2.32	0.96	2.71	-0.21	1.74	-0.8	1.35	0.96	9.52	0.76	1.54	1.74	2.71	-0.41	3.49	2.12	2.32	1.54	-0.41	4.46	2.71	-0.6	3.1	1.15	1.54	-0.41	-0.02		1.15	10.69	6.6	1.15
	High	Unambiguous	MVNHFVQEFK		9.95116e-06	0.000414347	8	264	HORVU4Hr1G059260.3 HORVU4Hr1G059260; HORVU5Hr1G113180.1 HORVU5Hr1G113180; HORVU4Hr1G059390.1 HORVU4Hr1G059390; HORVU3Hr1G086500.1 HORVU3Hr1G086500; HORVU5Hr1G021300.3 HORVU5Hr1G021300; HORVU6Hr1G081460.2 HORVU6Hr1G081460; HORVU1Hr1G072220.4 HORVU1Hr1G072220	1278.63	0.23	-0.01	1.17	2.34	1.64	0.93	1.87	4.22	0.93	0.46	0.46	0.93	0.46	2.11	2.11	-0.24	2.34	0.7	2.81	3.75	1.4	0.23	2.81	1.17	-1.18	1.17	0.23	-0.01	0.7	3.28	3.51	-0.01	0.46	1.17	1.87	1.17	1.4	2.81	1.64
	High	Unambiguous	MREIAEAFLSTTINNAVVTVPAYFNDSQR		1.48755e-05	0.000414347	1	68	HORVU4Hr1G059260.3 HORVU4Hr1G059260	3257.63		1.67	3.51		-1.16	-0.86	5.97	0.93	-0.17	-2.14	-2.75	0.69	-1.16	-0.42	-0.54	0.56	-0.3					1.67	-3.86	-0.3	3.2	-0.05	-3.73	3.14	-0.3	-0.67	3.1	-1.41	-1.89	3.14	-6.11	2.9	2.18	3.02	-0.4
	High	Unambiguous	VQQLLQDFFNGKELCK	1xDeamidated [Q/N]	9.60029e-06	0.000414347	8	81	HORVU4Hr1G059260.3 HORVU4Hr1G059260; HORVU5Hr1G113180.1 HORVU5Hr1G113180; HORVU4Hr1G059390.1 HORVU4Hr1G059390; HORVU3Hr1G086500.1 HORVU3Hr1G086500; HORVU5Hr1G021300.3 HORVU5Hr1G021300; HORVU6Hr1G081460.2 HORVU6Hr1G081460; HORVU1Hr1G072220.4 HORVU1Hr1G072220	1910.97	0.52	-1.84	-0.74	-2.47	-4.04	1.14	0.99	-2.15	-4.35	-1.21	-3.72	-0.11	-0.74	-0.9	-1.37	0.83	-0.9	-2	0.2	-1.05	-2.62	1.14	-0.27	-2.47	-0.11	-1.84	-0.9	-1.37	-0.58	-2.47	-2.62	-0.11	-4.98	-4.19	-2.62	-3.09	0.52	-2.94	-1.21
	High	Unambiguous	SINPDEAVAYGAAVQAAILSGEGNQK		1.54191e-05	0.000414347	1	17	HORVU4Hr1G059260.3 HORVU4Hr1G059260	2573.28		6.28	24.12	29.36	-27.76	28.08	25.87	31.35	25.4	21.9	16.42	29.6	26.57	24.93	14.56	17.94	12.34	30.3	29.25	31.7	-7.01	19.22	7.45	-29.86	-22.05	-29.04	-21.35	-28.81	25.52	26.45	31.35	29.13	27.73	-4.82	31.11	-28.11	32.05	28.55	24.82
	High	Rejected	SINPDEAVAYGAAVQAAILSGEGNQK	2xDeamidated [N/Q]	1.49827e-05	0.000414347	1	8	HORVU4Hr1G059260.3 HORVU4Hr1G059260	2575.25				1.69	-1.89	3.24	1.72				-2.01					2.19	4.49		4.62	4.18	7.19						8.89		8.83				7.28			8.27		4.95
	High	Unambiguous	FEELNMDLFR		0.000134784	0.000414347	7	14	HORVU4Hr1G059260.3 HORVU4Hr1G059260; HORVU5Hr1G113180.1 HORVU5Hr1G113180; HORVU4Hr1G059390.1 HORVU4Hr1G059390; HORVU3Hr1G086500.1 HORVU3Hr1G086500; HORVU2Hr1G112630.2 HORVU2Hr1G112630; HORVU1Hr1G072220.4 HORVU1Hr1G072220	1313.62						2.19	0.21		-0.25	2.95				2.49	1.73	3.1							8.13							4.32	4.17		5.99		4.47		3.1
	High	Unambiguous	QATKDAGVIAGLNVMR		6.90026e-06	0.000414347	3	18	HORVU4Hr1G059260.3 HORVU4Hr1G059260; HORVU5Hr1G113180.1 HORVU5Hr1G113180; HORVU3Hr1G086500.1 HORVU3Hr1G086500	1643.89		0.24	-0.49			2.43	-1.04									1.7	-1.04		0.61		2.8	1.15		0.24				0.24	-0.67	-1.22							2.07	-2.13	-0.85
	High	Unambiguous	ITITNDKGR		9.08154e-05	0.000414347	8	327	HORVU4Hr1G059260.3 HORVU4Hr1G059260; HORVU5Hr1G113180.1 HORVU5Hr1G113180; HORVU4Hr1G059390.1 HORVU4Hr1G059390; HORVU3Hr1G086500.1 HORVU3Hr1G086500; HORVU5Hr1G021300.3 HORVU5Hr1G021300; HORVU6Hr1G081460.2 HORVU6Hr1G081460; HORVU1Hr1G072220.4 HORVU1Hr1G072220	1017.57	-7.95	-0.87	-3.53	-7.95	-1.17	-4.11	-4.41	-4.7	-3.82	-4.41	-4.11	-1.76	-2.94	-2.35	-4.41	-0.58	-3.82	-8.54	-3.82	-4.7	-3.23	-4.7	-6.18	-1.46	-9.72	-5.29	-4.7	-3.53	-1.76	-7.06	-8.54	-5.59	-3.82	-5	-2.05	-3.23	-3.23	-1.46	-4.7
	High	Unambiguous	EQVFSTYSDNQPGVLIQVYEGERTR		3.57144e-05	0.000414347	4	5	HORVU4Hr1G059260.3 HORVU4Hr1G059260; HORVU5Hr1G021300.3 HORVU5Hr1G021300; HORVU6Hr1G081460.2 HORVU6Hr1G081460	2915.42	-11.2	-3.99	-1.01																		-2.96						1.46	-5.02							-4.3
	High	Unambiguous	MYQGAGPGGAAGMDEDMPSGGAGAGGGSGAGPKIEEVD	1xDeamidated [Q3]	0.000211866	0.00060347	1	10	HORVU4Hr1G059260.3 HORVU4Hr1G059260	3409.43								5.61					6.75	6.75	8.6						10.98	8.16														3.67
	High	Unambiguous	STAGDTHLGGEDFDNR		0.00021493	0.00060347	1	98	HORVU4Hr1G059260.3 HORVU4Hr1G059260	1691.73	3.47	0.28	-0.43	2.4	-0.97	1.52	-0.61	-0.43	0.45	-1.32	1.16		0.28	0.81	0.1	1.52	-0.79	-0.08	1.87	0.81	0.98	0.63	0.45	0.63	1.52	1.87	-0.61	0.28	0.81	-1.14	0.45	0.81	1.34	-0.79	-1.68	-0.61	-0.08	-1.85	0.98
	High	Unambiguous	NDQGNRTTPSYVAFTDTER	1xAcetyl [N-Term]; 2xDeamidated [Q3; N5]	0.000494268	0.000693743	3	38	HORVU4Hr1G059260.3 HORVU4Hr1G059260; HORVU4Hr1G059390.1 HORVU4Hr1G059390; HORVU1Hr1G072220.4 HORVU1Hr1G072220	2215.97		16.04	16.85		14.82		20.5			19.96	18.07			18.47	19.96	18.34			16.58		18.47		17.12	16.98	15.49	15.22		18.34		17.66				16.71	16.85	16.31		18.61
	High	Unambiguous	NALENYAYNMR	1xOxidation [M10]	0.000264675	0.000693743	4	11	HORVU4Hr1G059260.3 HORVU4Hr1G059260; HORVU4Hr1G059390.1 HORVU4Hr1G059390; HORVU3Hr1G086500.1 HORVU3Hr1G086500; HORVU1Hr1G072220.4 HORVU1Hr1G072220	1374.61	1.2	-1.42	2.8			-0.69		1.49				-1.27		5.85		0.33	4.55		1.93		-5.78			-0.69								6.15	-1.57	-0.26	1.64				0.76
	High	Unambiguous	NVLIFDLGGGTFDVSLLTIEEGIFEVK		0.000583005	0.000693743	7	4	HORVU4Hr1G059260.3 HORVU4Hr1G059260; HORVU5Hr1G113180.1 HORVU5Hr1G113180; HORVU4Hr1G059390.1 HORVU4Hr1G059390; HORVU3Hr1G086500.1 HORVU3Hr1G086500; HORVU5Hr1G021300.3 HORVU5Hr1G021300; HORVU6Hr1G081460.2 HORVU6Hr1G081460; HORVU1Hr1G072220.4 HORVU1Hr1G072220	2925.55
	High	Unambiguous	VEIVANDQGNR		0.000733571	0.000852642	3	11	HORVU4Hr1G059260.3 HORVU4Hr1G059260	1214.61					-6.97				-7.13		0.11		0.44			1.1													1.76			-5.32
	High	Unambiguous	NAVVTVPAYFNDSQR	1xDeamidated [Q/N]	0.000890478	0.00115556	7	30	HORVU4Hr1G059260.3 HORVU4Hr1G059260; HORVU5Hr1G113180.1 HORVU5Hr1G113180; HORVU4Hr1G059390.1 HORVU4Hr1G059390; HORVU3Hr1G086500.1 HORVU3Hr1G086500; HORVU5Hr1G021300.3 HORVU5Hr1G021300; HORVU6Hr1G081460.2 HORVU6Hr1G081460; HORVU1Hr1G072220.4 HORVU1Hr1G072220	1681.82		1.6	0.65	-1.01	0.89	3.39		1.49		1.01	-7.9					-9.5	1.13	-6.11	0.18	0.18	9.33	34.92	-8.97			-8.79	5.41		0.41	-7.9	2.2	-9.86					-9.86		-0.42
	High	Selected	NTTIPTKKEQVFSTYSDNQPGVLIQVYEGER		0.00221608	0.00137649	6	9	HORVU4Hr1G059260.3 HORVU4Hr1G059260; HORVU4Hr1G059390.1 HORVU4Hr1G059390; HORVU5Hr1G021300.3 HORVU5Hr1G021300; HORVU6Hr1G081460.2 HORVU6Hr1G081460; HORVU1Hr1G072220.4 HORVU1Hr1G072220	3541.78		1.03	-0.21
	High	Unambiguous	EQVFSTYSDNQPGVLIQVYEGER	2xDeamidated [Q/N]	0.00212265	0.00137649	6	9	HORVU4Hr1G059260.3 HORVU4Hr1G059260; HORVU4Hr1G059390.1 HORVU4Hr1G059390; HORVU5Hr1G021300.3 HORVU5Hr1G021300; HORVU6Hr1G081460.2 HORVU6Hr1G081460; HORVU1Hr1G072220.4 HORVU1Hr1G072220	2660.24		11.92	13.16						-2.4		-3.19																	7.97					-2.74
	High	Unambiguous	EQVFSTYSDNQPGVLIQVYEGERTR	1xDeamidated [Q/N]	0.00303927	0.00137649	4	4	HORVU4Hr1G059260.3 HORVU4Hr1G059260; HORVU5Hr1G021300.3 HORVU5Hr1G021300; HORVU6Hr1G081460.2 HORVU6Hr1G081460	2916.4			4.13																					10.71
	High	Unambiguous	DAGVIAGLNVMR	1xOxidation [M11]	0.00405025	0.00185291	3	8	HORVU4Hr1G059260.3 HORVU4Hr1G059260; HORVU5Hr1G113180.1 HORVU5Hr1G113180; HORVU3Hr1G086500.1 HORVU3Hr1G086500	1231.65	3.24		-3.58	-1.63	-0.01		4.7			-9.1	2.45		-4.86	0.15			-6.32	-0.33	-4.86	-4.07		-6.57		-9.24	8.92	5.51		-7.15	-0.66			-4.86		1.94	-5.2	0.32	-0.33	2.1	7.62
	High	Selected	MVQEAEKYKSEDEQVR		0.00460895	0.00185291	1	46	HORVU4Hr1G059260.3 HORVU4Hr1G059260	1968.93	1.75	3.58	1.95			2.36	0.32	0.53	1.54	1.75			1.34	2.76	2.97	1.14	1.75	1.34		0.12	1.14				4.18	1.75	-0.69	0.32	1.95	1.54		1.34		0.93	0.93			1.75
	High	Unambiguous	NTTIPTKK		0.00750954	0.00300571	14	130	HORVU4Hr1G059260.3 HORVU4Hr1G059260; HORVU5Hr1G113180.1 HORVU5Hr1G113180; HORVU4Hr1G059390.1 HORVU4Hr1G059390; HORVU3Hr1G086500.1 HORVU3Hr1G086500; HORVU3Hr1G073230.1 HORVU3Hr1G073230; HORVU5Hr1G021300.3 HORVU5Hr1G021300; HORVU4Hr1G012460.1 HORVU4Hr1G012460; HORVU4Hr1G089090.2 HORVU4Hr1G089090; HORVU6Hr1G081460.2 HORVU6Hr1G081460; HORVU1Hr1G072220.4 HORVU1Hr1G072220	902.531	1.29	-1.15	-2.48	-1.37	-2.48	-0.26	-0.92	-2.92	-1.81	-2.48	-4.69	-2.92	-5.36	-2.7	-4.25	-1.59	-2.03	-0.7	-1.37	0.63	-2.7	-1.59	-2.25	-2.25	0.18	-3.81	-0.92	-2.7	-1.59	-3.81	-0.26	0.18	-3.14	-2.7	-1.12	-4.47	-0.92	-3.14	1.29
	High	Unambiguous	MREIAEAFLSTTINNAVVTVPAYFNDSQR	1xDeamidated [N/Q]	0.0135293	0.00436389	1	4	HORVU4Hr1G059260.3 HORVU4Hr1G059260	3258.61	6.78			22.04				5.1						1.35				5.95			5.22				5.35	1.26
	High	Unambiguous	SINPDEAVAYGAAVQAAILSGEGNQK	3xDeamidated [N3; Q15; N24]	0.0176455	0.0052397	1	1	HORVU4Hr1G059260.3 HORVU4Hr1G059260	2576.24			5.3	6.47	6.47	4.91	7.44		3.56	9.52					7.42		7.77		7.89		8.12			4.53			5.88	8.8		6.66	8.8		6.25					-0.15
	High	Unambiguous	VQDLLLLDVTPLSLGLETAGGVMTTLIPR	1xOxidation [M23]	0.0190954	0.00570935	2	2	HORVU4Hr1G059260.3 HORVU4Hr1G059260; HORVU1Hr1G072220.4 HORVU1Hr1G072220	3051.7																3.12				-0.67					-4.21
	High	Unambiguous	MYQGAGPGGAAGMDEDMPSGGAGAGGGSGAGPKIE	1xDeamidated [Q3]	0.0225236	0.0067842	1	2	HORVU4Hr1G059260.3 HORVU4Hr1G059260	3066.29	12.91	5.96	8.01	6.55	10.56	7.33	5.37	8.21	7.13	10.95	11.54		7.92	8.11	7.62	10.66	7.04	9.87	8.41	10.66	8.89	8.21	9.48	9.19	8.89	9.87	3.02	6.45	7.33	7.23	8.89	5.96		4.88	7.92	4.59	8.99	7.33	4.39
	High	Unambiguous	DISGNPR		0.0261886	0.00709161	8	129	HORVU4Hr1G059260.3 HORVU4Hr1G059260; HORVU5Hr1G113180.1 HORVU5Hr1G113180; HORVU4Hr1G059390.1 HORVU4Hr1G059390; HORVU3Hr1G086500.1 HORVU3Hr1G086500; HORVU5Hr1G021300.3 HORVU5Hr1G021300; HORVU6Hr1G081460.2 HORVU6Hr1G081460; HORVU1Hr1G072220.4 HORVU1Hr1G072220	758.379	-5.83	-1.61	-1.34	-3.72	-2.13	-5.04	-2.66	-4.77	-3.45	-5.56	-6.09	-3.19	-5.83	-6.62	-4.51	-4.77	-4.77	-4.51	-6.35	-2.13	-4.77	-5.83	-6.88	-3.98	-3.45	-5.04	-6.62	-3.98	-3.72	-2.66	-4.51	-2.66	-6.62	-2.93	-3.45	-3.98	-5.04	-2.13	-3.45
TRUE	High	Master Protein	HORVU4Hr1G071960.2 HORVU4Hr1G071960	chr4H:582567169-582572246 HC_G|cell division cycle 48|GO:0005524, GO:0016787|PF00004, PF02359, PF02933|IPR003338, IPR003593, IPR003959, IPR003960, IPR004201, IPR005938, IPR009010, IPR027417, IPR029067	0	69	43	4875	3	1	817	90.6	5.29	159.28	276.02	415.69	217.94	351.74	236.72	318.94	117.15	176.67	283.07	353.57	27.02	56.42	133.17	218.48	218.31	341.53	233.8	306.48	214.02	310.55	307.08	425.11	275.86	190.28	285.87	210.01	293.76	299.84	382.88	202.18	334.55	131.8	245.45	157.95	244.33
	Confidence	PSM Ambiguity	Sequence	Modifications	Qvality PEP	Qvality q-value	# Proteins	# PSMs	Master Protein Accessions	Theo. MH+ [Da]	DeltaM [ppm] (by Search Engine): A Sequest HT	DeltaM [ppm] (by Search Engine): AA Sequest HT	DeltaM [ppm] (by Search Engine): AB Sequest HT	DeltaM [ppm] (by Search Engine): AC Sequest HT	DeltaM [ppm] (by Search Engine): AD Sequest HT	DeltaM [ppm] (by Search Engine): AE Sequest HT	DeltaM [ppm] (by Search Engine): AF Sequest HT	DeltaM [ppm] (by Search Engine): AG Sequest HT	DeltaM [ppm] (by Search Engine): AH Sequest HT	DeltaM [ppm] (by Search Engine): AI Sequest HT	DeltaM [ppm] (by Search Engine): AJ Sequest HT	DeltaM [ppm] (by Search Engine): AK Sequest HT	DeltaM [ppm] (by Search Engine): AL Sequest HT	DeltaM [ppm] (by Search Engine): AM Sequest HT	DeltaM [ppm] (by Search Engine): AN Sequest HT	DeltaM [ppm] (by Search Engine): AO Sequest HT	DeltaM [ppm] (by Search Engine): AP Sequest HT	DeltaM [ppm] (by Search Engine): AQ Sequest HT	DeltaM [ppm] (by Search Engine): AR Sequest HT	DeltaM [ppm] (by Search Engine): AS Sequest HT	DeltaM [ppm] (by Search Engine): AT Sequest HT	DeltaM [ppm] (by Search Engine): AU Sequest HT	DeltaM [ppm] (by Search Engine): AV Sequest HT	DeltaM [ppm] (by Search Engine): B Sequest HT	DeltaM [ppm] (by Search Engine): C Sequest HT	DeltaM [ppm] (by Search Engine): D Sequest HT	DeltaM [ppm] (by Search Engine): E Sequest HT	DeltaM [ppm] (by Search Engine): F Sequest HT	DeltaM [ppm] (by Search Engine): G Sequest HT	DeltaM [ppm] (by Search Engine): H Sequest HT	DeltaM [ppm] (by Search Engine): I Sequest HT	DeltaM [ppm] (by Search Engine): J Sequest HT	DeltaM [ppm] (by Search Engine): K Sequest HT	DeltaM [ppm] (by Search Engine): L Sequest HT	DeltaM [ppm] (by Search Engine): M Sequest HT	DeltaM [ppm] (by Search Engine): N Sequest HT	DeltaM [ppm] (by Search Engine): O Sequest HT	DeltaM [ppm] (by Search Engine): P Sequest HT	DeltaM [ppm] (by Search Engine): Q Sequest HT
	High	Unambiguous	DNPEAMEEDEVDEVAEIR		2.51615e-08	0	2	36	HORVU4Hr1G071960.2 HORVU4Hr1G071960; HORVU4Hr1G072010.1 HORVU4Hr1G072010	2089.89	1.1	5.31	1.38		0.9		1.3	4.92	1.69		-0.34			-0.24	-1.01	2.15		4.25	3.49	8.48		-0.91	-0.28		5.5	3.74	-0.34	3.59	4.06	1.96		1.77			3.39		2.44	2.15	5.31
	High	Unambiguous	GFGSEFRFPDQPAAGTASAAAADPFASAAAAAEDDDLYS		6.14504e-18	0	1	205	HORVU4Hr1G071960.2 HORVU4Hr1G071960	3835.7		0.47	-1.25	3.13	1.41	-3.44	1.49	2.43	1.1	-1.4	-0.47		0.47	3.05	0.4	2.74	-0.07	2.35	-2.19	1.57	-1.64	2.98	0.4	0.63	-1.4	0.47	2.74	0.4	0.79	1.41	1.65	1.65	2.66	-1.79	3.76	1.8	0.47	0.24	-2.03
	High	Unambiguous	VLNQLLTEMDGMNAK		1.47917e-08	0	9	94	HORVU4Hr1G071960.2 HORVU4Hr1G071960; HORVU4Hr1G072010.1 HORVU4Hr1G072010	1676.83		-2.08	-6.13	0.19	-0.41	0.55	-1	-1.6		0.07	-1.84			-2.08	-2.43	3.17	-3.51	0.91	-0.76	0.79	-3.63	-0.76	-0.41		0.91	-2.91			-0.88	-1.24	0.91	0.38	-1.72	1.1	-1.24	-1.48	-2.43	-0.41	-1.24
	High	Unambiguous	VHILPIDDTVEGITGNLFDAFLKPYFLEAYRPLR		8.88183e-13	0	2	156	HORVU4Hr1G071960.2 HORVU4Hr1G071960; HORVU4Hr1G072010.1 HORVU4Hr1G072010	3933.09	-0.64	0.5	1.9	-3.95	2.15	1.52	0.25	1.9	-3.06	0.37	1.39	0.37	-2.17	-0.77	0.12	0.37	2.03	-1.15	-1.66	-1.53	1.77	-4.46	0.5	-1.41	-0.64	-1.15	-1.02	-1.02	0.63	0.76	1.9	-1.28	2.41	-0.26	-0.01	-0.77	3.04	-2.8	0.5
	High	Unambiguous	EKMDIIDLEDETIDAEILNSMAVTNDHFK		6.94512e-14	0	2	267	HORVU4Hr1G071960.2 HORVU4Hr1G071960; HORVU4Hr1G072010.1 HORVU4Hr1G072010	3349.58	0.94	-0.01	2.97	1.06	-0.97	0.46	2.02	1.06	1.42	1.54	1.06	2.85		1.06	-0.85	1.42	-0.25	2.14	-0.25	-1.57	-2.04	0.46	1.66	-0.37	1.18	-0.49	1.78	0.58	0.94	2.73	-0.49	-0.73	0.7	2.26	1.66	1.18	-0.25	1.06	-0.37
	High	Unambiguous	GSAPCVLFFDELDSIATQR		1.06881e-09	0	4	267	HORVU4Hr1G071960.2 HORVU4Hr1G071960; HORVU4Hr1G072010.1 HORVU4Hr1G072010	2069	0.21	-0.95	2.38	-0.66	0.79	-1.1	1.22	2.24	-1.97	0.93	0.35			1.66	0.93	5.08	2.67	0.21	-2.11	-2.11	-1.1	0.35	-1.97	-1.82	-0.66	0.21	1.37	0.06	1.22	0.93	-1.1	1.66	-1.97	-1.82	0.79	-0.66	-0.66	-1.39	2.38
	High	Unambiguous	ELQETVQYPVEHPEKFEK		9.9852e-08	0	9	240	HORVU4Hr1G071960.2 HORVU4Hr1G071960; HORVU4Hr1G072010.1 HORVU4Hr1G072010	2230.1	1.05	-0.21	0.87	1.4	-0.39	2.12	-0.57	3.74	2.12	1.4	-0.03	-0.39	-1.65	1.94	1.22	0.69	1.58	1.05	1.76	1.58	-0.03	0.87	2.12	-0.93	-1.82	2.48	-0.57	2.12	0.51	1.76	1.94	-0.21	1.05	-1.11	1.4	1.58	2.12	1.22	1.4
	High	Unambiguous	GSSVGDAGGAADR		2.57577e-07	0	3	301	HORVU4Hr1G071960.2 HORVU4Hr1G071960	1119.5	1.8	0.73	-1.06	1.09	0.2	1.09	-0.52	-3.38	0.55	-1.06	0.73	-0.34	-0.52	-0.52	1.45	1.09	0.02	-1.59	-1.06	0.73	-0.52	0.02	-0.16	0.37	1.98	-0.34	-1.77	1.8	-0.34	0.55	0.37	0.55	-1.41	-0.34	-1.06	-3.02	0.37	-1.41	0.91
	High	Unambiguous	YQAFAQTLQQSR		5.39563e-07	0	6	163	HORVU4Hr1G071960.2 HORVU4Hr1G071960; HORVU4Hr1G072010.1 HORVU4Hr1G072010	1440.72	-2.14	-2.14	-1.3	-1.3	-2.97	-2.97	0.08	-0.33	-1.3	-2.28	-0.61	-2.69		-0.19	0.22	-1.44	-1.17	-0.33	-0.61	-0.75	-0.47	-0.89	-1.72	0.78	0.22	-1.58	-1.58	-0.75	-0.05	-1.03	-0.75	-4.5	-1.17	-1.17	0.36	-0.33	0.22	-2.28	-2.28
	High	Unambiguous	RIVSQLLTLMDGLK		7.71108e-08	0	6	118	HORVU4Hr1G071960.2 HORVU4Hr1G071960; HORVU4Hr1G072010.1 HORVU4Hr1G072010	1586.93	-0.8	-0.24	-0.8	-0.62	1.84	-1.75	0.14	2.79	0.9	0.52	-2.88	2.03	-0.62	-3.26	-0.99	-2.13	0.9	-0.24	-4.21	-1.56	-3.64	-0.62	-0.24	-1.56	-1.94	0.9	1.27	-0.99	-0.43	-0.43	1.09	-0.8	0.14	-1.18	-0.43	-1.56	0.33	-0.43	-1.18
	High	Unambiguous	IVSQLLTLMDGLK		7.54678e-08	0	6	227	HORVU4Hr1G071960.2 HORVU4Hr1G071960; HORVU4Hr1G072010.1 HORVU4Hr1G072010	1430.83	-1.67	-0.13	0.71	-1.95	0.01	-1.81	-0.83	-0.27	-1.81	-1.67	-1.11	-1.95	-1.53	-2.09	-0.27	0.29	-0.83	-0.27	-2.23	-3.49	-3.35	-2.09	-0.97	-1.11	-1.39	0.29	-2.65	-0.13	-1.11	0.71	-0.69	-1.53	-1.25	-2.23	-0.83	-0.13	-1.25	-0.97	-3.07
	High	Unambiguous	AVANETGAFFFLINGPEIMSK		2.16735e-11	0	8	141	HORVU4Hr1G071960.2 HORVU4Hr1G071960; HORVU4Hr1G072010.1 HORVU4Hr1G072010	2256.14	0.09	-3	-0.61	0.89		-1.94	-0.61	1.95	-3.19	-1.14	-0.21	3.99			-1.54	-3.67	1.25	-0.21	0.06		-2.87	0.46	0.46	-3	-3.37	-0.08	1.25	1.65	-0.08	-1.4	-2.07	-0.21	-1.54	0.86	2.4	0.86	1.16	-0.61	-0.88
	High	Unambiguous	AFEEAEKNAPSIIFIDEIDSIAPK		3.1768e-10	0	2	162	HORVU4Hr1G071960.2 HORVU4Hr1G071960; HORVU4Hr1G072010.1 HORVU4Hr1G072010	2647.35	-0.98	0.83	-0.75	-2.11	0.83	-2.57	-1.21	-5.06	-2.79	0.04	-2.68	-1.21	-2.34	0.38	-2.34	-0.98	0.27	-2.23	-1.21	-0.07	-0.64	-0.87	-4.49	0.15	0.15	-2.68	1.74	-1.21	-1.89	-3.02	-2.68	-2.34	-0.98	-0.19	-1.77	-1.77	-1.55	-6.08	-3.47
	High	Unambiguous	LVVDEATNDDNSVVALHPDTMER		5.1119e-09	0	2	266	HORVU4Hr1G071960.2 HORVU4Hr1G071960; HORVU4Hr1G072010.1 HORVU4Hr1G072010	2540.19	-1.33	-0.62	-0.38	0.44	0.09	0.21	-0.97	-1.45	1.74	1.15	1.15	-2.51	0.44	1.51	0.33	3.87	0.56	-0.15	0.33	1.39	4.58	2.45	0.44	0.21	-1.21	1.74	1.74	1.62	1.27	1.03	1.27	1.15	2.21	1.62	-0.15	0.44	1.86	-0.15	0.56
	High	Unambiguous	MDIIDLEDETIDAEILNSMAVTNDHFK		1.47084e-11	0	2	280	HORVU4Hr1G071960.2 HORVU4Hr1G071960; HORVU4Hr1G072010.1 HORVU4Hr1G072010	3092.44	1.61	0.16	1.81	2.58	2.58	3.46	-0.81	2	0.55	-1.01	-1.39	4.72	6.37	6.17	0.74	3.65	-0.81	3.07	1.61	5.88	1.71	1.52	1.71	-0.33	0.06	3.26	1.71	2.49	1.23	1.23	-0.13	3.46	1.52	0.16	-0.23	1.23	0.64	-0.91	3.65
	High	Unambiguous	TALTTSNPSALR		1.02954e-06	0.000341594	2	191	HORVU4Hr1G071960.2 HORVU4Hr1G071960; HORVU4Hr1G072010.1 HORVU4Hr1G072010	1231.66	0.84	-1.43	-0.95	1	-0.14	-0.95	-0.79	-0.14	-1.27	0.19	1.65	0.51	-1.11	-1.27	0.03	0.84	-3.22	-1.27	-0.46	0.19	-0.62	0.68	-0.3	0.03	2.95	0.51	0.68	-0.3	0.51	-0.79	-0.79	0.19	-0.95	0.68	-0.62	-0.3	1.33	-2.08	-1.92
	High	Unambiguous	LAGESESNLR		2.87404e-06	0.000341594	5	264	HORVU4Hr1G071960.2 HORVU4Hr1G071960; HORVU4Hr1G072010.1 HORVU4Hr1G072010	1075.54	0.27	-1.4	-1.96	-2.14	-1.4	-1.21	-1.4	-3.44	-4.93	-2.14	-0.84	-2.14	-4.93	-0.84	-1.03	-1.03	-6.23	-0.1	-2.89	-1.58	-1.58	0.27	-1.58	0.46	-1.77	-3.44	-1.77	0.09	-2.14	-1.4	-1.77	-3.26	-2.33	-2.33	-1.77	-2.89	-1.58	-5.68	-0.84
	High	Unambiguous	LAEDVELEHISR		1.13026e-06	0.000341594	2	143	HORVU4Hr1G071960.2 HORVU4Hr1G071960; HORVU4Hr1G072010.1 HORVU4Hr1G072010	1410.72	-0.42	-0.84	0.01	-0.84	-0.84	0.43	-1.48	1.07	0.65	0.22	-0.84		0.01	0.43	-1.05	0.22	1.71	0.01	2.14	0.22	1.71	-0.42	2.56	-1.05	0.65	1.5	0.43	0.86	0.22	0.43	0.86	-1.48	0.01	-0.42	1.29	1.92	-0.63	1.29
	High	Unambiguous	ETVVEVPNVSWEDIGGLENVKR		1.60675e-06	0.000341594	2	113	HORVU4Hr1G071960.2 HORVU4Hr1G071960; HORVU4Hr1G072010.1 HORVU4Hr1G072010	2469.26	-0.67	1.03	0.43	0.43	-1.4	1.4	1.52	-4.8		0.43	-1.27				-0.91	2.13	-1.4	-1.76	1.4	0.31	-1.27	1.03	-0.18	-1.03	-1.4	-1.27	1.03	-0.42	0.55	0.18	-0.18	0.43	-2.37	-0.55	-2.49	-2.61		-0.91
	High	Unambiguous	VHILPIDDTVEGITGNLFDAFLKPYFLEAYRPLRK		4.33536e-05	0.000414347	2	30	HORVU4Hr1G071960.2 HORVU4Hr1G071960; HORVU4Hr1G072010.1 HORVU4Hr1G072010	4061.19	3.58	1.81	3.58	-1		2.25	0.18			4.17				0.18		-1.59		1.66	2.25	0.77		-1.44	1.95		-0.71	2.25	-0.41		-0.12	1.66	1.81	2.4	2.25	2.54			5.2	1.51	1.95
	High	Unambiguous	NAPSIIFIDEIDSIAPK		3.47035e-05	0.000414347	2	20	HORVU4Hr1G071960.2 HORVU4Hr1G071960; HORVU4Hr1G072010.1 HORVU4Hr1G072010	1842.98				-0.34	-0.99	1.07	-1.32		-0.78						-2.08	0.63	-1.65		-0.99	-3.06	0.31		-0.23						-4.9			-1.32	-2.19			0.09	0.85	-0.34
	High	Unambiguous	KYQAFAQTLQQSR		2.38917e-05	0.000414347	6	84	HORVU4Hr1G071960.2 HORVU4Hr1G071960; HORVU4Hr1G072010.1 HORVU4Hr1G072010	1568.82	1.26	-0.27	1.65	0.5	-0.65	2.03	-0.08	0.12	-0.08	0.31	0.12			-0.46	1.07	-0.27	-1.22	0.88	1.26	0.5	-1.41	0.31	0.5	1.07	1.07	0.88	-0.84	-2.18	1.07	0.88	-0.65	-0.65	0.88	0.5	1.45		0.12	-0.27	2.79
	High	Unambiguous	LGDVVSVHQCPDVK		3.11606e-05	0.000414347	2	4	HORVU4Hr1G071960.2 HORVU4Hr1G071960; HORVU4Hr1G072010.1 HORVU4Hr1G072010	1495.76	-0.41		-14.72				1.41				-0.2					1.21	1.81					-1.4	-0.2		6.68
	High	Unambiguous	MATPNPPPQQGEPSSSADPK	1xMet-loss+Acetyl [N-Term]	1.01678e-05	0.000414347	2	95	HORVU4Hr1G071960.2 HORVU4Hr1G071960	1946.91	-0.36	0.67	-1.68		-0.77	-1.18	-2.61	-1.49	0.26	0.36	0.87	4.26	1.8	1.08	0.67	1.18	-0.77	0.05	0.56	1.8	2.31	0.87	0.26	0.63	0.15	1.08	-1.8	0.67	2.52	0.05	1.8	-1.68	0.67	0.46	-1.28	-0.26	-0.36	-0.15	0.67
	High	Unambiguous	LDQLIYIPLPDVDSR		6.8509e-06	0.000414347	2	74	HORVU4Hr1G071960.2 HORVU4Hr1G071960; HORVU4Hr1G072010.1 HORVU4Hr1G072010	1756.95		3.16		0.31	0.99	0.65	0.08	1.56	0.08	0.08	-1.05			0.99	-1.05	1.34	-0.83	1.79	0.88	4.52	-1.05	-1.4	0.08		-0.26	3.38		1.11	3.5	-0.14	-1.85	0.08	1.22	0.54	0.08	-2.53	1.56	-1.17	0.2
	High	Unambiguous	GFGSEFRFPDQPAAGTASAAAADPFASAAAAAEDDDLYS	1xDeamidated [Q11]	3.62309e-05	0.000414347	1	37	HORVU4Hr1G071960.2 HORVU4Hr1G071960	3836.68	11.49	16.65	20.56	8.6		7.51	5	11.65		10.63	7.43	7.12	9.3	7.19	6.1	9.77	5.16	8.99	12.9	17.36	11.89	7.43			7.04	8.91	8.44	8.6	7.27	12.35	14.07	9.38			5.79	4.3	9.15	7.12	8.37
	High	Unambiguous	GILLFGPPGSGK		6.76596e-05	0.000414347	2	134	HORVU4Hr1G071960.2 HORVU4Hr1G071960; HORVU4Hr1G072010.1 HORVU4Hr1G072010	1142.66	-0.44	-2.36	-1.66	-1.66	-0.61	-0.96	-1.31	-1.66	-1.14	-0.79	-0.96	-2.89	-3.24	-1.31	-2.19	-0.09	1.32	-1.31	-0.09	1.32	-0.61	-0.61	-0.96	-0.96	-0.96	-0.96	-2.36	-0.09	-2.71	-1.31	-0.96	-1.49	1.32	-1.84	-0.96	-1.14	-0.44	-0.09	0.44
	High	Unambiguous	YTQGFSGADITEICQR		0.000501416	0.000693743	6	10	HORVU4Hr1G071960.2 HORVU4Hr1G071960; HORVU4Hr1G072010.1 HORVU4Hr1G072010	1788.82	1.34					1.12	0.34		0.91					1.23		-8.99	-3.24			-0.22		1.01	-13.68								-0.45					-2.24	0.67
	High	Unambiguous	EIDIGVPDEVGRLEVLR		0.000663427	0.000693743	9	153	HORVU4Hr1G071960.2 HORVU4Hr1G071960; HORVU4Hr1G072010.1 HORVU4Hr1G072010	1909.04	-3.65	-3.02	0.12	-0.82	-1.61	-0.51	-0.04	-0.82	-3.18	1.38	-1.45		-2.71	-0.35	-0.04	0.59	0.12	-0.98	-0.04	-0.04	-1.61	0.75	-1.77	-0.51	-1.45	-0.98	-0.98	-1.29	0.91	-0.67	-0.19	0.75	-1.61	-2.71	-1.77	-1.77	-1.45	-0.82	-3.65
	High	Unambiguous	GVLFYGPPGCGK		0.000365607	0.000693743	9	46	HORVU4Hr1G071960.2 HORVU4Hr1G071960; HORVU4Hr1G072010.1 HORVU4Hr1G072010	1194.6	-1.56	-4.24	-2.07		-4.24		-1.4	-0.06	-6.59	-1.4	-2.23			-0.39	-3.24	0.61	-0.39	-2.9	-1.4	-3.07		-0.39	-3.24	-4.58	-2.23	-2.07	-1.56	-2.23	-1.9	-1.56	-2.07	-0.22	0.95	-0.56	-1.4	-2.07	-4.74	-2.07
	High	Unambiguous	DNPEAMEEDEVDEVAEIR	1xDeamidated [N2]	0.0011782	0.00127704	2	8	HORVU4Hr1G071960.2 HORVU4Hr1G071960; HORVU4Hr1G072010.1 HORVU4Hr1G072010	2090.87	9.98			11.61		11.8	11.42		10.75	8.26				18.78			9.5			9.89	13.81		7.59		13.52	8.26					5.39		11.51	6.44		8.17			5.87
	High	Unambiguous	VLNQLLTEMDGMNAKK		0.00130277	0.00127704	9	24	HORVU4Hr1G071960.2 HORVU4Hr1G071960; HORVU4Hr1G072010.1 HORVU4Hr1G072010	1804.93	3.65	4.31		3.15		2.65		4.81	9.13	7.47	4.64					2.48	6.8	3.81	9.46	6.14	5.47	1.32	2.98	0.99	8.63	3.48			2.48	6.8	8.13	5.14			5.97		2.48	5.31
	High	Unambiguous	AIANECQANFISIK		0.0011614	0.00127704	9	3	HORVU4Hr1G071960.2 HORVU4Hr1G071960; HORVU4Hr1G072010.1 HORVU4Hr1G072010	1521.77						3.77					-1.88											-1.36
	High	Unambiguous	SVSDADIR		0.00174863	0.00137649	6	33	HORVU4Hr1G071960.2 HORVU4Hr1G071960; HORVU4Hr1G072010.1 HORVU4Hr1G072010	862.426		0.74	0.04		-4.6	0.51	-0.65			-1.58	-2.51			-0.88	0.27	-0.19	-0.42		-2.51	0.27	-1.58	-0.65	0.27	0.51	1.43	-0.42				0.97	-0.42	-1.12						0.27
	High	Unambiguous	AHVIVMGATNRPNSIDPALRR		0.00238102	0.00137649	9	26	HORVU4Hr1G071960.2 HORVU4Hr1G071960; HORVU4Hr1G072010.1 HORVU4Hr1G072010	2288.24	2.61	0.2	2.39	2.17	0.64		0.86	4.36	2.83	2.39	1.3			3.26	1.3	1.3	2.17	2.39	4.57	2.61	1.3	0.64	1.3	3.26	0.64	1.95		2.17	1.08	2.17	2.17	-0.89		1.95		2.39	1.3	3.7	2.61
	High	Unambiguous	GPELLTMWFGESEANVR	1xOxidation [M7]	0.00153666	0.00137649	9	12	HORVU4Hr1G071960.2 HORVU4Hr1G071960; HORVU4Hr1G072010.1 HORVU4Hr1G072010	1951.92			7.93	8.87	3.8	9.16	1.49		2.1	11.83					2.87	11.31	3.64		-0.66	6.41	4.24	8.86	2.26		8.96	10.8		8.56	9.78			10.6
	High	Unambiguous	DYSTAILER		0.00139973	0.00137649	7	136	HORVU4Hr1G071960.2 HORVU4Hr1G071960; HORVU4Hr1G072010.1 HORVU4Hr1G072010	1067.54	-11.65	-11.65	-2.66	-6.03	-3.04	-6.22	-7.72	-27.02	-3.41	-1.16	-3.6	-3.97	-7.16	-3.6	-4.72	-3.22	-3.97	-6.97	-8.47	-3.79	-9.59	-5.28	-3.22	-6.97	-3.41	-3.41	-8.09	-9.78	-5.66	-7.53	-8.84	-6.97	-6.22	-5.66	-7.91	-18.02	-10.91	-9.59	-18.4
	High	Unambiguous	DIDLSALAK		0.00464216	0.00185291	2	182	HORVU4Hr1G071960.2 HORVU4Hr1G071960; HORVU4Hr1G072010.1 HORVU4Hr1G072010	945.525	-0.65	-0.44	-1.71	-1.07	-0.65	-1.28	-4.46	-1.71	-4.88	-1.28	-2.13	-7.63	-9.96	-5.94	-3.61	0.2	-1.07	-2.98	-1.5	-4.25	0.83	-0.86	-3.4	-1.5	-2.13	-2.55	-0.44	-2.34	-0.44	-1.28	-3.82	-5.09	-2.34	-5.09	-2.55	-4.46	0.2	-0.23	-3.61
	High	Unambiguous	ELVELPLR		0.00382419	0.00185291	10	9	HORVU4Hr1G071960.2 HORVU4Hr1G071960; HORVU4Hr1G072010.1 HORVU4Hr1G072010	968.578				-2.46	-2.26	-1.84	-2.46				-2.26					1.26	-3.08						-0.19		6.83					-0.19
	High	Unambiguous	LVVDEATNDDNSVVALHPDTMER	1xDeamidated [N]	0.00740249	0.00300571	2	8	HORVU4Hr1G071960.2 HORVU4Hr1G071960; HORVU4Hr1G072010.1 HORVU4Hr1G072010	2541.18		5.99	5.16	7.52						4.33	5.51			8.58					3.74					7.28	4.21	10.47		7.87			6.46								1.26
	High	Unambiguous	TVFIIGATNRPDIIDPALLRPGRLDQLIYIPLPDVDSR		0.0112256	0.0038095	2	24	HORVU4Hr1G071960.2 HORVU4Hr1G071960; HORVU4Hr1G072010.1 HORVU4Hr1G072010	4243.36	2.85	-8.54	1.01		-8.04		-7.48			-8.18	-3.66	-2.89	-8.31	-6.42	-4.65				-1.96	-0.41	-4.51	1.01	-1.68	-2.67		-3.94	-4.42	0.02	-2.53	-0.41	-3.23	0.3	-8.19	-0.83			-3.59	-3.23	-5.24
	High	Unambiguous	NAPSIIFIDEIDSIAPKR		0.0140237	0.00444017	2	4	HORVU4Hr1G071960.2 HORVU4Hr1G071960; HORVU4Hr1G072010.1 HORVU4Hr1G072010	1999.09							-5.51									-7.76	-6.71	-5.81				-5.81	-4.31								-9.41
	High	Unambiguous	LAGESESNLRK		0.0149597	0.00478307	5	9	HORVU4Hr1G071960.2 HORVU4Hr1G071960; HORVU4Hr1G072010.1 HORVU4Hr1G072010	1203.63	-8.1	9.42	-2.36		-5.35	-4.86				-6.6			-1.88			-5.1		-7.6	-6.6	-7.6	-6.6	-3.36	-1.86	-3.36	-7.35	-7.85		-4.36	-5.85	-5.35	-6.35			-5.35			-4.61
	High	Unambiguous	MATPNPPPQQGEPSSSADPK	1xDeamidated [Q/N]; 1xMet-loss+Acetyl [N-Term]	0.0175192	0.0052397	2	7	HORVU4Hr1G071960.2 HORVU4Hr1G071960	1947.89	14.52	12.88	10.48	8.26	7.54	-0.27	9.09	0.35	8.38	11.85	10.63	10.21			12.47	6.61		14.52	10.63	7.4	10	2.1	9.4	11.4	9.39	11.64	6.2	10.17	-9.2	11.13	6.54	10.01		8.05	-10.02	11.55	12.36	-0.57
	High	Selected	RKDNPEAMEEDEVDEVAEIR		0.0247269	0.00682521	2	21	HORVU4Hr1G071960.2 HORVU4Hr1G071960; HORVU4Hr1G072010.1 HORVU4Hr1G072010	2374.08		10.05	8.53			14.26	8.53			3.82	6.68					13.59	7.19		10.73		16.29	7.86	5.67	8.2	6.18	9.21		7.02		8.03							10.22
	High	Unambiguous	GDLFLVR		0.0265673	0.00717209	8	8	HORVU4Hr1G071960.2 HORVU4Hr1G071960; HORVU4Hr1G072010.1 HORVU4Hr1G072010	819.472		7.58	9.53	9.53	9.77	3.43	7.09			1.72	8.31				16.12	15.14	23.68		24.17	7.09	10.02	4.4	3.43	7.82	3.43			13.43	1.23	11.97	9.53	6.6	10.51	14.41					16.61
	High	Unambiguous	KYQAFAQTLQQSR	2xDeamidated [Q]	0.0277367	0.00747639	6	4	HORVU4Hr1G071960.2 HORVU4Hr1G071960; HORVU4Hr1G072010.1 HORVU4Hr1G072010	1570.79						-5.25				-8.31	-6.78		-7.93	-7.93		-5.44	-8.5					-5.44	-6.4	-2.58				-0.29	8.5					-6.97
	High	Selected	TALTTSNPSALRETVVEVPNVSWEDIGGLENVKR		0.0315628	0.00843941	2	29	HORVU4Hr1G071960.2 HORVU4Hr1G071960; HORVU4Hr1G072010.1 HORVU4Hr1G072010	3681.91	2.15	-1.65	1.72	-1.11		0.09	-4.91	-0.45	-1.21	-0.56	-2.52				-0.89	-0.35	-2.19	-4.69	-1.21	0.63	-1.21	1.94		0.85	0.41	-1.76	0.85	-0.35	0.52	-1.32	-2.3	0.63		-0.67	-3.71		-1.98	-1
	High	Unambiguous	AVANETGAFFFLINGPEIMSK	1xDeamidated [N]	0.0346503	0.00919146	8	7	HORVU4Hr1G071960.2 HORVU4Hr1G071960; HORVU4Hr1G072010.1 HORVU4Hr1G072010	2257.12			12.31			8.15	8.59			11.25				7.35	9.12	5.67				11.52	9.83							4.07	10.45	5.76	5.58							6.91	9.39
TRUE	High	Master Protein	HORVU6Hr1G039890.3 HORVU6Hr1G039890	chr6H:210031729-210037717 HC_G|V-type ATP synthase beta chain|GO:0005524, GO:0015991, GO:0015992, GO:0016820, GO:0033178, GO:0033180, GO:0046034|PF00006, PF00306, PF02874|IPR000194, IPR000793, IPR004100, IPR005723, IPR020003, IPR022879, IPR027417	0	72	38	5189	3	1	544	60.5	5.33	222.79	172.9	303.55	197.73	384.29	230.1	295.61	196.04	318.84	220.32	307.86	122.98	230.89	194.21	265.69	178.13	244.45	246.88	352.86	223.68	379.52	196.19	282.17	345.24	223.96	312.53	280.2	394.17	269.58	378.99	236.97	356.78	197.94	283.3	230.55	425.3
	Confidence	PSM Ambiguity	Sequence	Modifications	Qvality PEP	Qvality q-value	# Proteins	# PSMs	Master Protein Accessions	Theo. MH+ [Da]	DeltaM [ppm] (by Search Engine): A Sequest HT	DeltaM [ppm] (by Search Engine): AA Sequest HT	DeltaM [ppm] (by Search Engine): AB Sequest HT	DeltaM [ppm] (by Search Engine): AC Sequest HT	DeltaM [ppm] (by Search Engine): AD Sequest HT	DeltaM [ppm] (by Search Engine): AE Sequest HT	DeltaM [ppm] (by Search Engine): AF Sequest HT	DeltaM [ppm] (by Search Engine): AG Sequest HT	DeltaM [ppm] (by Search Engine): AH Sequest HT	DeltaM [ppm] (by Search Engine): AI Sequest HT	DeltaM [ppm] (by Search Engine): AJ Sequest HT	DeltaM [ppm] (by Search Engine): AK Sequest HT	DeltaM [ppm] (by Search Engine): AL Sequest HT	DeltaM [ppm] (by Search Engine): AM Sequest HT	DeltaM [ppm] (by Search Engine): AN Sequest HT	DeltaM [ppm] (by Search Engine): AO Sequest HT	DeltaM [ppm] (by Search Engine): AP Sequest HT	DeltaM [ppm] (by Search Engine): AQ Sequest HT	DeltaM [ppm] (by Search Engine): AR Sequest HT	DeltaM [ppm] (by Search Engine): AS Sequest HT	DeltaM [ppm] (by Search Engine): AT Sequest HT	DeltaM [ppm] (by Search Engine): AU Sequest HT	DeltaM [ppm] (by Search Engine): AV Sequest HT	DeltaM [ppm] (by Search Engine): B Sequest HT	DeltaM [ppm] (by Search Engine): C Sequest HT	DeltaM [ppm] (by Search Engine): D Sequest HT	DeltaM [ppm] (by Search Engine): E Sequest HT	DeltaM [ppm] (by Search Engine): F Sequest HT	DeltaM [ppm] (by Search Engine): G Sequest HT	DeltaM [ppm] (by Search Engine): H Sequest HT	DeltaM [ppm] (by Search Engine): I Sequest HT	DeltaM [ppm] (by Search Engine): J Sequest HT	DeltaM [ppm] (by Search Engine): K Sequest HT	DeltaM [ppm] (by Search Engine): L Sequest HT	DeltaM [ppm] (by Search Engine): M Sequest HT	DeltaM [ppm] (by Search Engine): N Sequest HT	DeltaM [ppm] (by Search Engine): O Sequest HT	DeltaM [ppm] (by Search Engine): P Sequest HT	DeltaM [ppm] (by Search Engine): Q Sequest HT
	High	Unambiguous	IFNGSGKPIDNGPPILPEAYLDISGSSINPSER		1.26025e-13	0	4	347	HORVU7Hr1G087190.1 HORVU7Hr1G087190; HORVU6Hr1G039890.3 HORVU6Hr1G039890	3454.75	3.58	2.71	-2.15	-0.59	0.14	-2.76	0.37	-0.79	1.99	-0.32	0.26	0.72	0.26	-1.6	2.57	-2.06	-1.02	-1.6	1.07	-0.21	-2.64	0.49	0.49	1.07	-2.29	-0.09	1.41	-1.25	-1.02	-0.67	-3.91	-0.56	-3.22	0.49	-1.02	-0.21	0.8	-0.9	0.28
	High	Unambiguous	IALTTAEYLAYECGK		7.65592e-08	0	3	108	HORVU7Hr1G087190.1 HORVU7Hr1G087190; HORVU6Hr1G039890.3 HORVU6Hr1G039890	1645.81	2.64		2.64	4.82	0.45	1.3	1.79	2.76	1.06	2.64	1.18			9.32	-0.04	3.85	1.3	1.3	1.3	4.82	-0.52	3.24	5.19	1.06	3.97	-0.4	3.61	1.18	0.45	0.33	2.76	-0.28		5.8	1.54	1.3	3.85	1.66
	High	Unambiguous	AVVGEEALSSEDLLYLEFLDKFER		1.99971e-08	0	3	552	HORVU7Hr1G087190.1 HORVU7Hr1G087190; HORVU6Hr1G039890.3 HORVU6Hr1G039890	2772.4	-0.03	-2.08	0.73	-0.13	1.92	0.41	0.95	-0.78	0.41	-0.13	-0.35	-0.57	0.62	0.73	-0.57	-1.22	-0.03	-0.89	-0.35	0.52	-2.3	-0.78	1.16	-0.46	-0.78	1.92	0.73	0.62	1.06	0.52	-0.24	-0.67	-0.46	1.38	0.41	-0.46	0.73	-0.46	-0.57
	High	Unambiguous	DHSDVSNQLYANYAIGK		7.19043e-07	0	3	51	HORVU7Hr1G087190.1 HORVU7Hr1G087190; HORVU6Hr1G039890.3 HORVU6Hr1G039890	1894.89	5.84		14.39	6.16	5.05	12.01				3.31	3.62		3.78	4.42	9.48	6.16	12.65		7.26	6.95		6.16	5.52		3.47		15.81	6.95	3.78	4.42	12.96		8.37	9.01	10.91	9.32	7.58	9.48	10.27
	High	Unambiguous	DHSDVSNQLYANYAIGKDVQAMK		4.39652e-09	0	3	182	HORVU7Hr1G087190.1 HORVU7Hr1G087190; HORVU6Hr1G039890.3 HORVU6Hr1G039890	2567.22	1.67	1.21	1.36	-0.35	1.21	4.32	-0.2	-3.62	0.74	3.85	0.43	3.85	-0.82	2.76	2.3	1.36	-1.29	1.52	1.98	0.11	5.88	1.05	-0.35	-0.82	2.3	-0.82	1.52	1.36	0.89	3.54	1.05	3.39	2.3	2.92	1.67	-0.2	-0.04	0.74	-0.66
	High	Unambiguous	TYPEEMIQTGISTIDVMNSIAR		2.97139e-15	0	4	208	HORVU7Hr1G087190.1 HORVU7Hr1G087190; HORVU6Hr1G039890.3 HORVU6Hr1G039890	2469.2	2.16	-1.73	3.43	1.11	0.27	-0.43	1.36	2.16	-0.46	2.24	0.39	3.13	-0.22	2.65	-0.34	-0.03	0.39	2.32	-0.95	2.08	-1.31	0.46	1.59	-0.7	3.05	0.63	-0.43	0.39	1.76	2.58	-0.03	0.63	-0.27	1.27	1.51	0.87	2.08	2.21	1.27
	High	Unambiguous	HVLVILTDMSSYADALREVSAAR		1.9154e-08	0	3	176	HORVU7Hr1G087190.1 HORVU7Hr1G087190; HORVU6Hr1G039890.3 HORVU6Hr1G039890	2517.31	-1.59	1.9	0.79	-3.02	-0.96	-1.75	1.74	-0.48	1.43	-0.01	-0.8	-1.91	-0.48	-0.48	-1.59	1.58	-2.23	1.11	-1.59	-1.75	-2.07	0.31	-1.91	-1.12	0.31	-0.01	-0.48	2.06	-0.64	0.15	1.27	0.15	1.11	0.63	-1.75	1.43	-0.48	-0.64	-1.12
	High	Unambiguous	HVLVILTDMSSYADALR		7.66767e-11	0	3	187	HORVU7Hr1G087190.1 HORVU7Hr1G087190; HORVU6Hr1G039890.3 HORVU6Hr1G039890	1903.99	-4.55	0.33	3.01	-2.82	-1.08	-0.61	-0.61	1.28	-0.61	1.28	-2.03	0.02	0.49	-0.77	-1.87	-2.34	0.65	1.28	-2.34	-0.45	-5.02	0.33	-0.61	-0.93	-1.08	-0.61	0.65	-0.61	-2.82	-2.5	-2.03	0.18	-3.92	-1.56	-2.66	-1.4	-0.77	-0.77	-1.08
	High	Unambiguous	KGSITQIPILTMPNDDITHPTPDLTGYITEGQIYIDR		5.15663e-12	0	2	138	HORVU6Hr1G039890.3 HORVU6Hr1G039890	4127.1	0.49	-2.32	-1.06	-3.97	-3.09	-3.19	-0.86	-2.9	-1.64	-0.77	-3.58	-3.58	-0.86	-3.19	-3.77	-1.35	-3.09	-2.8	-1.54	-1.64	-0.77	-1.25	-3.48	-3.77	0.78	-2.32	-0.19	-1.45	-3.77	-2.03	-1.15	-0.09	0.2	-2.12	-2.03	-0.67	-2.71	-5.13	-1.93
	High	Unambiguous	GYPGYMYTDLATIYER		2.37125e-09	0	3	63	HORVU7Hr1G087190.1 HORVU7Hr1G087190; HORVU6Hr1G039890.3 HORVU6Hr1G039890	1912.88	-1.28	-0.55	5.79			0.46	1.4	2.27			0.61	-0.34	-0.03		0.77		0.77	0.29	0.93	2.48	-0.8		3.43	0.93	0.6	-0.8	1.96	0.3		-0.8	-0.76			1.08	-0.65	-0.86	-0.65	-0.33	-0.65
	High	Unambiguous	GQKIPLFSAAGLPHNEIAAQICR		8.22575e-08	0	4	59	HORVU7Hr1G087190.1 HORVU7Hr1G087190; HORVU6Hr1G039890.3 HORVU6Hr1G039890	2434.3	-2.21	-1.56	1.89			-3.69	-2.05	0.58	0.09	1.57	0.09			-3.69			-4.19	-1.23	-0.41	-2.05	-3.53		-1.23	-3.04	-2.54	-2.54	-2.21	-0.73	0.09	-3.04	-0.24	1.4	-1.56		-3.2	0.09	-3.2	0.42
	High	Unambiguous	VTLFLNLANDPTIER		3.41325e-10	0	3	365	HORVU7Hr1G087190.1 HORVU7Hr1G087190; HORVU6Hr1G039890.3 HORVU6Hr1G039890	1715.93	-1.83	-1.36	0.15	0.85	-0.78	-0.55	0.15	0.04	-2.22	-2.18	-0.9	-2.53	0.39	-0.31	-2.99	0.97	-0.9	-1.36	0.04	-5.09	-1.36	2.6	-1.83	-0.47	0.27	-0.3	-0.9	-0.3	-0.66	0.27	-0.66	-1	-1.25	-1.25	-1.6	-0.78	-0.9	-1.6	-3.93
	High	Unambiguous	NIFQSLDLAWTLLR		3.10911e-10	0	3	304	HORVU7Hr1G087190.1 HORVU7Hr1G087190; HORVU6Hr1G039890.3 HORVU6Hr1G039890	1689.93	-3.64	-2.69	-2.45	-2.57	-0.13	-3.4	-0.91	-5.41	-3.16	-2.22	-1.73	-3.64	-7.78	-3.28	-6.36	-3.28	-2.81	-5.65	-3.04	-4.94	-1.98	-3.87	-4.35	-5.88	-2.81	-0.91	-1.98	-4.7	-4.82	-3.16	-1.51	-3.64	-4.23	-2.08	0.03	0.39	0.86	-3.4	-2.1
	High	Unambiguous	YTTVQFTGEVLKTPVSLDMLGR		3.78837e-08	0	4	129	HORVU7Hr1G087190.1 HORVU7Hr1G087190; HORVU6Hr1G039890.3 HORVU6Hr1G039890	2455.29	1.52	0.54	0.3	0.78	-1.78	1.88	0.3	-1.29	-0.56	2.01	-3.86	-0.93	0.78	1.52	-2.27	-0.68	1.03	-0.19	-2.39	1.88	-3	-1.66	-0.93	-1.29	0.66	1.27	-0.56	0.05	2.37	-3.61	-0.44	-1.05	-2.15	2.13	-0.44	-0.68	-0.07	-1.9	0.05
	High	Unambiguous	RGYPGYMYTDLATIYER		2.01791e-07	0	3	58	HORVU7Hr1G087190.1 HORVU7Hr1G087190; HORVU6Hr1G039890.3 HORVU6Hr1G039890	2068.98	5.06	0.56	0.27	5.93	-0.45	-0.02	1	3.17	0.71	-9.88	1.14	-0.74	2.01	3.17	0.27	2.45	1.87	3.61	1.43	3.32	0.56	2.74	1.72	3.75	0.27	3.32	4.91	0.13	0.13	0.13	4.91	1.58	3.03	1.29	4.33	1	0.85		7.52
	High	Unambiguous	FVAQGAYDTR		1.72635e-06	0.000341594	3	202	HORVU7Hr1G087190.1 HORVU7Hr1G087190; HORVU6Hr1G039890.3 HORVU6Hr1G039890	1127.55	1	-0.78	-1.84	0.11	-3.08	-0.42	-1.66	-2.73	-2.37	-2.37	-0.42	3.84	-0.24	-0.6	-0.95	-1.84	-3.08	-1.84	-2.37	-1.31	0.11	-1.66	-1.49	-1.13	-2.55	-1.13	-2.02	-2.02	2.24	-1.31	-0.07	0.29	0.29	-0.95	-0.24	-0.95	-3.26	-0.6	0.82
	High	Unambiguous	IFNGSGKPIDNGPPILPEAYLDISGSSINPSER	1xDeamidated [N]	3.17791e-06	0.000341594	4	127	HORVU7Hr1G087190.1 HORVU7Hr1G087190; HORVU6Hr1G039890.3 HORVU6Hr1G039890	3455.73	4.44	6.09	-12.37	-5.2	2.88	-3.72	-1.38	-8.06	-0.86	-1.81	-7.89	-8.76	-11.44	2.18	-13.41	-1.29	2.18	-4.76	0.45	6.35	2.44	-7.71	-11.9	-13.76	6.35	2.18	6.61	-14.33	-5.11	2.53	-4.85		-0.34	5.39	-0.34	-1.9	-1.2	1.92	-5.72
	High	Unambiguous	TPVSLDMLGR		8.72842e-07	0.000341594	4	212	HORVU7Hr1G087190.1 HORVU7Hr1G087190; HORVU6Hr1G039890.3 HORVU6Hr1G039890	1088.58	0.98	-2.69	-0.86	-0.12	1.35	0.8	-0.12	-1.96	-1.78	0.43	-1.04	0.06	-2.51	0.25	-1.04	0.8	-0.12	0.25	0.98	-0.12	4.1	-0.12	0.06	-2.14	-0.12	-1.59	0.98	0.25	-0.12	0.43	-0.31	0.61	-0.12	-1.59	-1.41	-0.49	-0.31	0.43	-1.96
	High	Unambiguous	KGSITQIPILTMPNDDITHPTPDLTGYITEGQIYIDR	1xDeamidated [Q/N]	1.02218e-06	0.000341594	2	31	HORVU6Hr1G039890.3 HORVU6Hr1G039890	4128.08	5.53			7.17			-2.22		2.75		0.93					5.04							-0.64	4.27	5.43	4.27				5.04	3.98	3.78	8.82	0.57	-2.25	4.56		5.43	4.27
	High	Unambiguous	YTTVQFTGEVLK		1.26783e-06	0.000341594	4	147	HORVU7Hr1G087190.1 HORVU7Hr1G087190; HORVU6Hr1G039890.3 HORVU6Hr1G039890	1385.73	4.2	-13.56	-15	-2.01	-1.72	0.44	-0.57	-2.15	-2.88	-1.29	-1.14	-1.14	-0.28	-0.71	-3.31	0.3	-1	-1.43	-2.88	-2.01	2.9	-1.29	-2.15	22.96	0.3	-1.29	-5.91	-4.61	-4.32	-2.88	-2.59	-0.57	-1	0.3	-1.86	-1.29	-1.86	-0.85	-3.45
	High	Unambiguous	KFVAQGAYDTR		0.000157845	0.000414347	3	178	HORVU7Hr1G087190.1 HORVU7Hr1G087190; HORVU6Hr1G039890.3 HORVU6Hr1G039890	1255.64	-0.41	1.26	1.98	-1.84	-3.04	-0.17	-2.08	-3.04	-2.8	-1.13	-2.08	0.78	-1.84	-6.38	-4.47	-4.71	-2.08	-1.13	0.07	-1.37	0.07	0.31	1.26	-0.89	-0.41	-3.99	-3.28	-1.84	0.31	-1.84	-2.56	-4.71	0.07	-1.13	-2.8	-1.37	-0.89	1.26	0.78
	High	Unambiguous	DFEENGSMER		2.20775e-05	0.000414347	4	295	HORVU7Hr1G087190.1 HORVU7Hr1G087190; HORVU6Hr1G039890.3 HORVU6Hr1G039890	1213.48	0.77	2.25	-1.21	-0.55	0.44	0.93	-1.05	-1.7	-0.06	-0.55	0.77	0.44	1.26	2.42	0.11	-0.88	-0.55	1.43	1.1	-0.22	-0.22	1.1	-0.55	0.11	1.43	-0.72	0.27	0.44	0.27	-1.54	-0.06	-1.38	1.59	0.11	-0.39	1.1	-1.21	0.77	-0.06
	High	Unambiguous	QIYPPINVLPSLSR		3.27665e-05	0.000414347	3	101	HORVU7Hr1G087190.1 HORVU7Hr1G087190; HORVU6Hr1G039890.3 HORVU6Hr1G039890	1596.91	-2.05	-0.18	-0.43	-0.18	0.58	-0.55	0.33	-0.93	-2.81	-3.18	-1.8	-0.43	1.58	2.33	0.08	1.95	-1.8	0.2	-0.18	-1.18	-1.43	1.95	-1.3	-1.3	1.45	-1.43	0.08	-0.68	0.2	-1.05	-0.05	0.83	-0.43	-1.05	-2.05	-2.18	-1.18	-0.8	-0.93
	High	Unambiguous	TVSGVAGPLVILDK		7.10128e-06	0.000414347	4	128	HORVU7Hr1G087190.1 HORVU7Hr1G087190; HORVU6Hr1G039890.3 HORVU6Hr1G039890	1368.81				0.75	0.75	-2.46	0.31	-0.56	-2.46	1.63	-3.05	0.17	-0.56	-2.17	-2.02	0.46	-2.46	-1	1.34	-0.27	-3.19	-1.88	0.46	0.9		-1.29	0.31	-1.15	-2.9	-0.56	1.05	-0.42	-2.75	-0.85	-1.15	0.17	-1.73	-0.27	0.02
	High	Unambiguous	SAIGEGMTR		0.000205868	0.00060347	3	224	HORVU7Hr1G087190.1 HORVU7Hr1G087190; HORVU6Hr1G039890.3 HORVU6Hr1G039890	921.446	0.74	0.52	-1.21	-0.13	0.09	-0.13	1.17	1.61	-0.13	-0.56	0.74	0.31	0.96	-1.21	-0.78	0.09	0.31	0.52	0.74	1.39	-0.35	3.13	-0.56	1.17	0.09	0.31	0.52	0.96	0.31	1.83	0.96	-1.65	1.17	1.17	1.39	-0.13	-0.13	-0.35	2.48
	High	Unambiguous	YQEIVNIR		0.000307742	0.000693743	4	227	HORVU7Hr1G087190.1 HORVU7Hr1G087190; HORVU6Hr1G039890.3 HORVU6Hr1G039890	1034.56	-1.93	-2.9	-2.32	-0.58	-1.16	1.55	-3.28	-13.72	-5.8	0.2	-1.16	0.2	-0.19	0.39	0.2	-1.35	-19.33	0.97	-6.96	-1.93	0.78	-0.58	1.16	1.36	-0.96	0	-20.88	-3.09	0.97	0	0.39	-6.76	0.2	0.2	0.58	0.78	0.39	-0.96	-5.41
	High	Selected	AVVGEEALSSEDLLYLEFLDKFERK		0.000347688	0.000693743	3	122	HORVU7Hr1G087190.1 HORVU7Hr1G087190; HORVU6Hr1G039890.3 HORVU6Hr1G039890	2900.49	-2.14	-0.62	1.58	-0.76	-1.04	0.34	0.75	-2.28	-0.21	-0.35	0.62		-0.49	0.07	-1.73		0.48	0.62	-0.21	-0.9	-2.14	-0.62	0.62	-1.45	-2.14	-1.45	-1.73	-0.21	1.31	1.72	-0.76	-0.35	1.86	2.27	0.34	0.07	-0.9	1.03	0.75
	High	Unambiguous	NIFQSLDLAWTLLR	1xDeamidated [Q/N]	0.000440634	0.000693743	3	32	HORVU7Hr1G087190.1 HORVU7Hr1G087190; HORVU6Hr1G039890.3 HORVU6Hr1G039890	1690.92	9.09		10.68		12.63			7.84		8.55	6.96	10.86	3.41	7.13	-1.56	2.17	-4.75	8.2	6.6			11.39	6.78	8.2		9.09	12.81		6.07	7.13		8.02				5.72
	High	Unambiguous	DFEENGSMER	1xDeamidated [N5]	0.000270437	0.000693743	4	46	HORVU7Hr1G087190.1 HORVU7Hr1G087190; HORVU6Hr1G039890.3 HORVU6Hr1G039890	1214.46					6.85	9.65	8.49	5.69	9.15		9.81	3.55	9.65	11.46	7.18	8.66	6.52		9.32	9.32	7.83	7.83	5.36	8.33		9.65	-1.72		10.14	9.32	9.48	6.19	8.99	6.85	9.81	7.67	6.52	9.32	8.33
	High	Unambiguous	SINPSERTYPEEMIQTGISTIDVMNSIAR	1xAcetyl [N-Term]	0.00122126	0.00127704	4	18	HORVU7Hr1G087190.1 HORVU7Hr1G087190; HORVU6Hr1G039890.3 HORVU6Hr1G039890	3294.6					1.37	10.84	4.04	2.46	0.03		2.1						5.01				0.88		2.22	1.12	5.62	2.34	3.79			6.71		1.12	4.89			3.19		2.1
	High	Unambiguous	GQVLEVDGEK		0.00197561	0.00137649	4	34	HORVU7Hr1G087190.1 HORVU7Hr1G087190; HORVU6Hr1G039890.3 HORVU6Hr1G039890	1073.55			-0.03	5.02	2.6	4.28	0.74		6.7		4.09					2.6	0.55		-0.38	1.67	2.04		4.47						0.62	3.53				3.35	4.47	4.47		2.42
	High	Unambiguous	GQVLEVDGEKAVVQVFEGTSGIDNK		0.00143021	0.00137649	4	5	HORVU7Hr1G087190.1 HORVU7Hr1G087190; HORVU6Hr1G039890.3 HORVU6Hr1G039890	2618.33				-6.93		-3.15				-7.51		-4.87				-2.35		-6.82	-5.1		-2.99			-1.66					-15.76	-6.13				-11.63			-0.75
	High	Unambiguous	TLDQFYSR		0.00280849	0.00137649	2	10	HORVU6Hr1G039890.3 HORVU6Hr1G039890	1029.5			1.11							-0.25	-0.64			8.49		0.72			-0.45	-1.23	-0.25	-0.06		2.08				-1.61	0.91	-0.45	8.29		-5.31						-0.25
	High	Unambiguous	TYPEEMIQTGISTIDVMNSIAR	1xDeamidated [Q8]	0.00447848	0.00185291	4	3	HORVU7Hr1G087190.1 HORVU7Hr1G087190; HORVU6Hr1G039890.3 HORVU6Hr1G039890	2470.18	8.47				-1.44	-2.65	-0.1		1.23		7.58		7.5			10.98				10.41	-1.44					6.85	10.09	5.6		8.63	8.31	7.25
	High	Unambiguous	RGQVLEVDGEK		0.00532057	0.00219522	4	29	HORVU7Hr1G087190.1 HORVU7Hr1G087190; HORVU6Hr1G039890.3 HORVU6Hr1G039890	1229.65				-6.42	-5.2	-6.18				-5.44	-7.4	-7.15	-5.44	-6.42	-6.42	-6.91	-6.91				-3.49	-2.76	-4.22						-6.66	-3.98		-8.62	-1.3	-4.71	-9.1	-3.49
	High	Unambiguous	ENGSMERVTLFLNLANDPTIER	1xAcetyl [N-Term]	0.00563509	0.00239212	3	10	HORVU7Hr1G087190.1 HORVU7Hr1G087190; HORVU6Hr1G039890.3 HORVU6Hr1G039890	2561.27	-2.92		-0.11				8.09		6.92								4.58				6.8		6.1	1.3															-0.69
	High	Unambiguous	IFNGSGKPIDNGPPILPEAYLDISGSSINPSER	2xDeamidated [N3; N11]	0.00729696	0.00300571	4	2	HORVU7Hr1G087190.1 HORVU7Hr1G087190; HORVU6Hr1G039890.3 HORVU6Hr1G039890	3456.72			-5.77						4.09								-9.01		3.39	-7.97	-0.86			4.26		5.65		1.4	-8.55				9.03
	High	Unambiguous	AVVQVFEGTSGIDNK		0.00724476	0.00300571	4	13	HORVU7Hr1G087190.1 HORVU7Hr1G087190; HORVU6Hr1G039890.3 HORVU6Hr1G039890	1563.8				-1.78	-1.19	-3.06	-1.96			-1.91						2.95	-2.55					2.44	-2.34					6.15					-1.78	-0.62			-0.89
	High	Selected	RGQVLEVDGEKAVVQVFEGTSGIDNK		0.0111453	0.0038095	4	34	HORVU7Hr1G087190.1 HORVU7Hr1G087190; HORVU6Hr1G039890.3 HORVU6Hr1G039890	2774.43				-0.34	1.25	-1.06	0.89			0.38	-4.38	-0.92		2.4		0.09	0.71		-4.52	-5.67		-0.34	-0.48	-7.12	-6.54		0.24		-2.93	0.38	-2.07	-3.51	-2.79	-2.36	-1.06	-0.92	-0.77	0.71	-0.63
	High	Unambiguous	DFEENGSMER	1xOxidation [M8]	0.0108298	0.0038095	4	16	HORVU7Hr1G087190.1 HORVU7Hr1G087190; HORVU6Hr1G039890.3 HORVU6Hr1G039890	1229.47	3.1							0.83	-2.43	-1.13	-0.64	-1.61	-1.94		0.34			-1.94	-4.22					-1.29		-1.78			0.5	-1.13	1.15	-2.91	-1.29					-4.54	-1.94
	High	Unambiguous	DGAEMEEGTLEIGMEYR		0.0139234	0.00444017	1	3	HORVU6Hr1G039890.3 HORVU6Hr1G039890	1929.82					4.8	2.31				5.11	5.31						-0.08					4.28				-0.08						6.45		1.69	2.93	-1.22			3.24
	High	Unambiguous	AVVQVFEGTSGIDNKYTTVQFTGEVLK	1xDeamidated [Q/N]	0.0170233	0.00506521	4	4	HORVU7Hr1G087190.1 HORVU7Hr1G087190; HORVU6Hr1G039890.3 HORVU6Hr1G039890	2931.5												8.48			6.74														7.76						7.35		9.19
	High	Unambiguous	LGDGTTR	1xAcetyl [N-Term]	0.0184221	0.0053402	4	1	HORVU7Hr1G087190.1 HORVU7Hr1G087190; HORVU6Hr1G039890.3 HORVU6Hr1G039890	761.379		0.94				-0.37	3.04			2.25			11.97	1.2		0.41			-0.11			9.08	5.4				13.55	18.8		0.68			-13.25			4.09	18.8	-4.84	5.67
	High	Unambiguous	RDHSDVSNQLYANYAIGK		0.0267588	0.00717209	3	2	HORVU7Hr1G087190.1 HORVU7Hr1G087190; HORVU6Hr1G039890.3 HORVU6Hr1G039890	2050.99						0.43		5.5		2.77	-0.55					-7.04			3.16							6.65								-1.74
	High	Unambiguous	SAIGEGMTRR		0.0306693	0.00817953	3	6	HORVU7Hr1G087190.1 HORVU7Hr1G087190; HORVU6Hr1G039890.3 HORVU6Hr1G039890	1077.55	-4.55	-0.93	-2.05			-4		-0.93	-4	16.33		18.56		-6.5		-6.5						-2.05	-3.16		-2.07		-3.44	-4.55		-1.21					17.44		-5.67	5.17	-2.88
TRUE	High	Master Protein	HORVU1Hr1G072220.4 HORVU1Hr1G072220	chr1H:496657555-496660454 HC_G|Heat shock 70 kDa protein|none|PF00012|IPR013126, IPR018181, IPR029047, IPR029048	0	62	32	5049	5	1	589	64.3	5.21	226.13	290.93	420.7	274.89	399.19	293.4	360.4	264.39	311.37	304.1	375.32	181.19	283.66	281.02	410.14	352.59	474.5	255.02	320.59	245.53	339.68	286.83	328.46	308.56	223.68	257.3	229.19	286.91	309.8	344.43	232.92	309.22	189.71	329.4	229.95	339.07
	Confidence	PSM Ambiguity	Sequence	Modifications	Qvality PEP	Qvality q-value	# Proteins	# PSMs	Master Protein Accessions	Theo. MH+ [Da]	DeltaM [ppm] (by Search Engine): A Sequest HT	DeltaM [ppm] (by Search Engine): AA Sequest HT	DeltaM [ppm] (by Search Engine): AB Sequest HT	DeltaM [ppm] (by Search Engine): AC Sequest HT	DeltaM [ppm] (by Search Engine): AD Sequest HT	DeltaM [ppm] (by Search Engine): AE Sequest HT	DeltaM [ppm] (by Search Engine): AF Sequest HT	DeltaM [ppm] (by Search Engine): AG Sequest HT	DeltaM [ppm] (by Search Engine): AH Sequest HT	DeltaM [ppm] (by Search Engine): AI Sequest HT	DeltaM [ppm] (by Search Engine): AJ Sequest HT	DeltaM [ppm] (by Search Engine): AK Sequest HT	DeltaM [ppm] (by Search Engine): AL Sequest HT	DeltaM [ppm] (by Search Engine): AM Sequest HT	DeltaM [ppm] (by Search Engine): AN Sequest HT	DeltaM [ppm] (by Search Engine): AO Sequest HT	DeltaM [ppm] (by Search Engine): AP Sequest HT	DeltaM [ppm] (by Search Engine): AQ Sequest HT	DeltaM [ppm] (by Search Engine): AR Sequest HT	DeltaM [ppm] (by Search Engine): AS Sequest HT	DeltaM [ppm] (by Search Engine): AT Sequest HT	DeltaM [ppm] (by Search Engine): AU Sequest HT	DeltaM [ppm] (by Search Engine): AV Sequest HT	DeltaM [ppm] (by Search Engine): B Sequest HT	DeltaM [ppm] (by Search Engine): C Sequest HT	DeltaM [ppm] (by Search Engine): D Sequest HT	DeltaM [ppm] (by Search Engine): E Sequest HT	DeltaM [ppm] (by Search Engine): F Sequest HT	DeltaM [ppm] (by Search Engine): G Sequest HT	DeltaM [ppm] (by Search Engine): H Sequest HT	DeltaM [ppm] (by Search Engine): I Sequest HT	DeltaM [ppm] (by Search Engine): J Sequest HT	DeltaM [ppm] (by Search Engine): K Sequest HT	DeltaM [ppm] (by Search Engine): L Sequest HT	DeltaM [ppm] (by Search Engine): M Sequest HT	DeltaM [ppm] (by Search Engine): N Sequest HT	DeltaM [ppm] (by Search Engine): O Sequest HT	DeltaM [ppm] (by Search Engine): P Sequest HT	DeltaM [ppm] (by Search Engine): Q Sequest HT
	High	Unambiguous	TTPSYVAFTDTER		2.78219e-08	0	3	343	HORVU4Hr1G059260.3 HORVU4Hr1G059260; HORVU4Hr1G059390.1 HORVU4Hr1G059390; HORVU1Hr1G072220.4 HORVU1Hr1G072220	1487.7	0.31	-1.3	0.58	1.25	-0.5	3	-0.23	-0.23	0.58	1.12	1.12	0.58	-0.09	0.31	0.85	0.71	-1.17	1.79	1.65	2.73	2.19	0.04	0.58	0.58	-2.65	-1.84	-1.3	-0.23	-0.23	0.04	2.46	-1.04	0.85	-1.71	0.44	1.38	-0.09	2.06	-0.09
	High	Unambiguous	IINEPTAAAIAYGLDKK		1.0437e-14	0	7	333	HORVU4Hr1G059260.3 HORVU4Hr1G059260; HORVU5Hr1G113180.1 HORVU5Hr1G113180; HORVU4Hr1G059390.1 HORVU4Hr1G059390; HORVU3Hr1G086500.1 HORVU3Hr1G086500; HORVU5Hr1G021300.3 HORVU5Hr1G021300; HORVU6Hr1G081460.2 HORVU6Hr1G081460; HORVU1Hr1G072220.4 HORVU1Hr1G072220	1787.99	2.95	1.77	3.45	0.43	1.1	3.28	0.77	0.6	0.1	2.28	1.77	0.6	1.77	2.61	1.44	2.95	1.94	2.78	2.44	0.77	7.31	1.77	2.28	2.28	3.95	1.27	4.12	-0.58	1.94	3.12	-0.41	1.94	2.28	2.61	-0.58	-0.91	0.93	-0.58	0.43
	High	Unambiguous	LINEPTAAAIAYGLDK		6.29505e-09	0	11	438	HORVU4Hr1G059260.3 HORVU4Hr1G059260; HORVU5Hr1G113180.1 HORVU5Hr1G113180; HORVU4Hr1G059390.1 HORVU4Hr1G059390; HORVU2Hr1G122780.2 HORVU2Hr1G122780; HORVU3Hr1G086500.1 HORVU3Hr1G086500; HORVU6Hr1G008880.1 HORVU6Hr1G008880; HORVU5Hr1G021300.3 HORVU5Hr1G021300; HORVU6Hr1G081460.2 HORVU6Hr1G081460; HORVU1Hr1G072220.4 HORVU1Hr1G072220	1659.9	-0.78	0.43	-3.91	-3.31	-1.5	-1.38	-0.9	-0.9	-0.05	-0.66	1.63	-3.19	-2.46	-1.02	0.43	0.07	0.19	-0.05	-0.05	-0.9	1.39	1.15	-0.9	-0.17	-0.42	-1.02	-0.29	-1.26	-0.17	-0.42	-0.54	-2.46	-0.66	-0.66	-0.17	-1.98	-1.14	0.07	-0.17
	High	Unambiguous	VQQLLQDFFNGKELCK		8.86823e-10	0	8	215	HORVU4Hr1G059260.3 HORVU4Hr1G059260; HORVU5Hr1G113180.1 HORVU5Hr1G113180; HORVU4Hr1G059390.1 HORVU4Hr1G059390; HORVU3Hr1G086500.1 HORVU3Hr1G086500; HORVU5Hr1G021300.3 HORVU5Hr1G021300; HORVU6Hr1G081460.2 HORVU6Hr1G081460; HORVU1Hr1G072220.4 HORVU1Hr1G072220	1909.98	-2.46	0.21	-0.1	0.52	-1.05	-0.1	-0.1	-0.1	-2.15	-1.67	-1.52	-2.77	0.52	-3.72	0.37	0.84	-0.57	-0.57	0.21	-1.05	-2.62	3.19	-0.73	-0.42	0.37	-2.15	-1.05	0.84	-0.42	-0.73	0.21	-2.77	-2.77	-2.3	-1.52	0.21	1	-1.05	-3.09
	High	Unambiguous	VQDLLLLDVTPLSLGLETAGGVMTTLIPR		2.42118e-17	0	2	239	HORVU4Hr1G059260.3 HORVU4Hr1G059260; HORVU1Hr1G072220.4 HORVU1Hr1G072220	3035.71	-3.9	-5.78	-1.13	-2.12	-1.13	1.54	-0.54	-0.84	-0.24	1.14	-1.13	3.22	-0.34	-0.44	-2.02	0.25	-0.05	-1.23	-1.73	-2.91	-1.53	-0.44	-2.22	-6.67	0.35	-1.73	-2.22	1.93	-3.6	0.35	-3.01	-1.03	0.25	-1.82	-2.02	-3.5	-0.93	-3.41	3.31
	High	Unambiguous	EQVFSTYSDNQPGVLIQVYEGER		4.48752e-21	0	6	648	HORVU4Hr1G059260.3 HORVU4Hr1G059260; HORVU4Hr1G059390.1 HORVU4Hr1G059390; HORVU5Hr1G021300.3 HORVU5Hr1G021300; HORVU6Hr1G081460.2 HORVU6Hr1G081460; HORVU1Hr1G072220.4 HORVU1Hr1G072220	2658.27	0.09	0.43	0.77	2.35	0.66	-2.95	-0.7	0.21	-1.71	1.22	-0.13	-0.47	-1.15	1.22	1.79	1.56	-1.37	-0.13	1.11	-0.02	-2.62	-0.7	1.11	0.43	-0.7	-2.05	0.32	-0.36	0.21	0.66	0.77	0.32	-1.15	-0.81	0.09	0.54	-1.37	1.22	-1.26
	High	Unambiguous	EQVFSTYSDNQPGVLIQVYEGER	1xDeamidated [Q/N]	9.09547e-08	0	6	142	HORVU4Hr1G059260.3 HORVU4Hr1G059260; HORVU4Hr1G059390.1 HORVU4Hr1G059390; HORVU5Hr1G021300.3 HORVU5Hr1G021300; HORVU6Hr1G081460.2 HORVU6Hr1G081460; HORVU1Hr1G072220.4 HORVU1Hr1G072220	2659.25		9.52	8.99	1.78	3.13	3.47	2.23	4.15		2.23	2.23		2.79		3.7	2.79	0.88	1.67	6.63	1.78	3.7	2.57	2.91		6.96	7.11	10.12	8.24	4.15	1.78	0.31	0.76	-0.14	10.27	1.33	2.57	1.21	2	6.73
	High	Unambiguous	NALENYAYNMR		3.76835e-07	0	4	346	HORVU4Hr1G059260.3 HORVU4Hr1G059260; HORVU4Hr1G059390.1 HORVU4Hr1G059390; HORVU3Hr1G086500.1 HORVU3Hr1G086500; HORVU1Hr1G072220.4 HORVU1Hr1G072220	1358.62	0.71	-1.2	-0.53	1.44	1.59	1.89	-0.17	0.12	0.14	1.3	1.3	-0.32	-0.47	0.71	-0.53	0.56	0.14	-0.62	0.12	1	-0.75	0.71	0.41	0.14	-1.63	0.14	-0.62	-1.35	-0.76	2.03	0.86	-1.63	-0.62	0.56	-0.03	0.56	-0.32	0.56	0.27
	High	Unambiguous	NAVVTVPAYFNDSQR		9.61502e-09	0	7	816	HORVU4Hr1G059260.3 HORVU4Hr1G059260; HORVU5Hr1G113180.1 HORVU5Hr1G113180; HORVU4Hr1G059390.1 HORVU4Hr1G059390; HORVU3Hr1G086500.1 HORVU3Hr1G086500; HORVU5Hr1G021300.3 HORVU5Hr1G021300; HORVU6Hr1G081460.2 HORVU6Hr1G081460; HORVU1Hr1G072220.4 HORVU1Hr1G072220	1680.83	1.75	0.14	1.39	0.5	2.1	3.18	0.14	-0.04	0.32	2.64	0.14	1.03	-1.11	2.46	0.5	1.21	0.5	0.32	2.64	1.21	6.92	0.5	1.75	-0.57	1.21	0.32	3.53	1.57	0.68	2.1	0.5	3	1.03	1.75	0.86	1.57	1.39	1.39	-0.75
	High	Unambiguous	NQVAMNPTNTVFDAK		4.89639e-09	0	2	67	HORVU3Hr1G086500.1 HORVU3Hr1G086500; HORVU1Hr1G072220.4 HORVU1Hr1G072220	1649.8	0.09	0.93	-0.16		-1.61	0.33	-8.64	-1.25	-2.34	-3.31	0.21	-2.22		-1	-0.03	-0.4	-1.49	0.09	-1.25	-0.16	-0.88	1.78	-0.03	0.09	-3.19		-4.04	-4.52	-1	-0.76	-0.4		-4.4		0.45	-2.94	-0.76	-2.82
	High	Unambiguous	NQVAMNPTNTVFDAKR		9.27601e-09	0	2	171	HORVU3Hr1G086500.1 HORVU3Hr1G086500; HORVU1Hr1G072220.4 HORVU1Hr1G072220	1805.9	1.08	-1.58	0.92	0.42	-2.41	-0.25	-0.91	1.25	0.42	1.75	0.42	2.08	-0.08	0.42	1.25	-0.08	0.58	0.25	2.08	1.25	0.25	-1.58	-0.91	-0.91	-2.41	0.42	-2.07	0.09	0.09	2.41	3.24	-1.41	1.08	0.09	-1.58	-0.41	1.41		0.25
	High	Unambiguous	ATAGDTHLGGEDFDNR		5.78633e-08	0	6	417	HORVU5Hr1G113180.1 HORVU5Hr1G113180; HORVU4Hr1G059390.1 HORVU4Hr1G059390; HORVU3Hr1G086500.1 HORVU3Hr1G086500; HORVU5Hr1G021300.3 HORVU5Hr1G021300; HORVU6Hr1G081460.2 HORVU6Hr1G081460; HORVU1Hr1G072220.4 HORVU1Hr1G072220	1675.73	3.93	3.03	0.35	2.49	0.88	1.24	1.24	2.49	2.49	-0.01	2.67	1.24	0.7	0.53	1.06	2.49	-0.01	0.17	2.32	1.06	3.03	1.6	1.96	0.88	1.96	1.96	0.7	1.78	2.67	0.88	2.14	-0.37	1.96	1.42	1.6	-0.55	1.6	-0.37	1.96
	High	Unambiguous	MYQGAAPDMGGGMGMDEDMPAGGGGAGPKIEEVD		9.27601e-09	0	1	18	HORVU1Hr1G072220.4 HORVU1Hr1G072220	3298.35			-0.79	2.94	0.94		-0.97			0.85	0.76	-1.24	6.31	0.21	-0.42		-1.24									2.3											-1.33		-1.24
	High	Selected	SINPDEAVAYGAAVQAAILSGEGNEK		9.03794e-19	0	6	128	HORVU5Hr1G113180.1 HORVU5Hr1G113180; HORVU3Hr1G086500.1 HORVU3Hr1G086500; HORVU5Hr1G021300.3 HORVU5Hr1G021300; HORVU6Hr1G081460.2 HORVU6Hr1G081460; HORVU1Hr1G072220.4 HORVU1Hr1G072220	2574.27	3.48			-0.02	1.96	-0.14	0.91	1.06	1.38	1.03	0.21	4.71	0.21	0.33	1.26	1.26	0.91	0.21	0.91	1.21	-1.42	1.49	1.26	0.91	0.33	1.84	1.38	1.73	1.49	-0.49	0.56	0.21		2.08	-0.25	1.14	-0.11	0.21	-3.29
	High	Unambiguous	MYQGAAPDMGGGMGMDEDMPAGGGGAGPK		4.02744e-06	0.000341594	1	5	HORVU1Hr1G072220.4 HORVU1Hr1G072220	2713.08					-0.07									0.15	2.36		-0.62									1.59
	High	Unambiguous	VQQLLQDFFNGK		2.50757e-06	0.000341594	9	58	HORVU4Hr1G059260.3 HORVU4Hr1G059260; HORVU5Hr1G113180.1 HORVU5Hr1G113180; HORVU4Hr1G059390.1 HORVU4Hr1G059390; HORVU3Hr1G086500.1 HORVU3Hr1G086500; HORVU5Hr1G021300.3 HORVU5Hr1G021300; HORVU6Hr1G081460.2 HORVU6Hr1G081460; HORVU1Hr1G072220.4 HORVU1Hr1G072220	1436.75				-0.92	-0.5	-2.17	-1.75			-1.89	-2.17		-1.89	-0.22	-1.89	0.06	-1.75	-0.92	-1.06			-1.47	-2.45		-1.75	-2.45	-3		-2.45	-2.31			-2.45	-2.45	-2.87	-2.45	-2.45	-2.31
	High	Unambiguous	VEIIANDQGNR		3.00619e-05	0.000414347	12	112	HORVU5Hr1G113180.1 HORVU5Hr1G113180; HORVU4Hr1G059390.1 HORVU4Hr1G059390; HORVU2Hr1G122780.2 HORVU2Hr1G122780; HORVU3Hr1G086500.1 HORVU3Hr1G086500; HORVU6Hr1G008880.1 HORVU6Hr1G008880; HORVU5Hr1G021300.3 HORVU5Hr1G021300; HORVU6Hr1G081460.2 HORVU6Hr1G081460; HORVU1Hr1G072220.4 HORVU1Hr1G072220; HORVU5Hr1G078400.1 HORVU5Hr1G078400	1228.63	1.37	2.35	-4	-0.09	-3.02	0.07	-1.56	-0.75	0.23	0.72	-1.72	1.7	-0.09	-0.91	-0.75	-0.09	-1.72	-4.65	-3.02	-0.58	-0.42	-0.09	1.86		0.39	-0.26	-5.63	-2.37	0.56	-2.21	1.53	-3.19	0.88	-0.26	4.14	-1.07	-0.75	-3.84	2.51
	High	Unambiguous	ARFEELNMDLFR		8.39196e-05	0.000414347	7	125	HORVU4Hr1G059260.3 HORVU4Hr1G059260; HORVU5Hr1G113180.1 HORVU5Hr1G113180; HORVU4Hr1G059390.1 HORVU4Hr1G059390; HORVU3Hr1G086500.1 HORVU3Hr1G086500; HORVU2Hr1G112630.2 HORVU2Hr1G112630; HORVU1Hr1G072220.4 HORVU1Hr1G072220	1540.76	2.9	7.38	0.96	3.29	4.46	5.24	2.51	2.32	0.96	2.71	-0.21	1.74	-0.8	1.35	0.96	9.52	0.76	1.54	1.74	2.71	-0.41	3.49	2.12	2.32	1.54	-0.41	4.46	2.71	-0.6	3.1	1.15	1.54	-0.41	-0.02		1.15	10.69	6.6	1.15
	High	Unambiguous	MDKSTVHDVVLVGGSTR		7.10128e-06	0.000414347	6	110	HORVU4Hr1G059390.1 HORVU4Hr1G059390; HORVU3Hr1G086500.1 HORVU3Hr1G086500; HORVU5Hr1G021300.3 HORVU5Hr1G021300; HORVU6Hr1G081460.2 HORVU6Hr1G081460; HORVU1Hr1G072220.4 HORVU1Hr1G072220	1800.93	0.51	1.84	2.28	1.17	1.4	1.16	2.06	1.62	2.73	1.4	1.17	-0.83		0.51	2.28	1.17	2.28	3.39	-0.16	1.4	2.51	0.51	0.95	2.06	1.17		1.62	0.73	2.73	0.51	0.95	0.95		2.73	3.62	0.95	2.51	1.84	3.62
	High	Unambiguous	MVNHFVQEFK		9.95116e-06	0.000414347	8	264	HORVU4Hr1G059260.3 HORVU4Hr1G059260; HORVU5Hr1G113180.1 HORVU5Hr1G113180; HORVU4Hr1G059390.1 HORVU4Hr1G059390; HORVU3Hr1G086500.1 HORVU3Hr1G086500; HORVU5Hr1G021300.3 HORVU5Hr1G021300; HORVU6Hr1G081460.2 HORVU6Hr1G081460; HORVU1Hr1G072220.4 HORVU1Hr1G072220	1278.63	0.23	-0.01	1.17	2.34	1.64	0.93	1.87	4.22	0.93	0.46	0.46	0.93	0.46	2.11	2.11	-0.24	2.34	0.7	2.81	3.75	1.4	0.23	2.81	1.17	-1.18	1.17	0.23	-0.01	0.7	3.28	3.51	-0.01	0.46	1.17	1.87	1.17	1.4	2.81	1.64
	High	Unambiguous	TLSSTAQTTIEIDSLYEGVDFYTTITR		1.56421e-05	0.000414347	1	2	HORVU1Hr1G072220.4 HORVU1Hr1G072220	3025.49												-3.86	-0.78		-0.49
	High	Unambiguous	STVHDVVLVGGSTR		1.09246e-05	0.000414347	6	207	HORVU4Hr1G059390.1 HORVU4Hr1G059390; HORVU3Hr1G086500.1 HORVU3Hr1G086500; HORVU5Hr1G021300.3 HORVU5Hr1G021300; HORVU6Hr1G081460.2 HORVU6Hr1G081460; HORVU1Hr1G072220.4 HORVU1Hr1G072220	1426.76	-1.49	-0.43	0.41	-0.86	-0.43	0.41	0.2	-0.86	-0.65	0.62	-0.43	-2.33	-2.54	-1.49	2.51	1.46	-0.22	-0.22	0.83	-0.43	-0.86	1.25	0.41	0.41	1.46	0.2	0.41	-0.43	3.35	-0.22	-1.7	-2.12	-2.12	-1.07	-0.01	-2.96	0.41	-0.65	0.83
	High	Unambiguous	VQQLLQDFFNGKELCK	1xDeamidated [Q/N]	9.60029e-06	0.000414347	8	81	HORVU4Hr1G059260.3 HORVU4Hr1G059260; HORVU5Hr1G113180.1 HORVU5Hr1G113180; HORVU4Hr1G059390.1 HORVU4Hr1G059390; HORVU3Hr1G086500.1 HORVU3Hr1G086500; HORVU5Hr1G021300.3 HORVU5Hr1G021300; HORVU6Hr1G081460.2 HORVU6Hr1G081460; HORVU1Hr1G072220.4 HORVU1Hr1G072220	1910.97	0.52	-1.84	-0.74	-2.47	-4.04	1.14	0.99	-2.15	-4.35	-1.21	-3.72	-0.11	-0.74	-0.9	-1.37	0.83	-0.9	-2	0.2	-1.05	-2.62	1.14	-0.27	-2.47	-0.11	-1.84	-0.9	-1.37	-0.58	-2.47	-2.62	-0.11	-4.98	-4.19	-2.62	-3.09	0.52	-2.94	-1.21
	High	Selected	SINPDEAVAYGAAVQAAILSGEGNEK	1xDeamidated [Q15]	1.49827e-05	0.000414347	6	4	HORVU5Hr1G113180.1 HORVU5Hr1G113180; HORVU3Hr1G086500.1 HORVU3Hr1G086500; HORVU5Hr1G021300.3 HORVU5Hr1G021300; HORVU6Hr1G081460.2 HORVU6Hr1G081460; HORVU1Hr1G072220.4 HORVU1Hr1G072220	2575.25				1.69	-1.89	3.24	1.72				-2.01	2.47				2.19	4.49		4.62	4.18	7.19						8.89		8.83			8.58	7.28	6.04		8.27		4.95
	High	Unambiguous	FEELNMDLFR		0.000134784	0.000414347	7	14	HORVU4Hr1G059260.3 HORVU4Hr1G059260; HORVU5Hr1G113180.1 HORVU5Hr1G113180; HORVU4Hr1G059390.1 HORVU4Hr1G059390; HORVU3Hr1G086500.1 HORVU3Hr1G086500; HORVU2Hr1G112630.2 HORVU2Hr1G112630; HORVU1Hr1G072220.4 HORVU1Hr1G072220	1313.62						2.19	0.21		-0.25	2.95				2.49	1.73	3.1							8.13							4.32	4.17		5.99		4.47		3.1
	High	Unambiguous	ITITNDKGR		9.08154e-05	0.000414347	8	327	HORVU4Hr1G059260.3 HORVU4Hr1G059260; HORVU5Hr1G113180.1 HORVU5Hr1G113180; HORVU4Hr1G059390.1 HORVU4Hr1G059390; HORVU3Hr1G086500.1 HORVU3Hr1G086500; HORVU5Hr1G021300.3 HORVU5Hr1G021300; HORVU6Hr1G081460.2 HORVU6Hr1G081460; HORVU1Hr1G072220.4 HORVU1Hr1G072220	1017.57	-7.95	-0.87	-3.53	-7.95	-1.17	-4.11	-4.41	-4.7	-3.82	-4.41	-4.11	-1.76	-2.94	-2.35	-4.41	-0.58	-3.82	-8.54	-3.82	-4.7	-3.23	-4.7	-6.18	-1.46	-9.72	-5.29	-4.7	-3.53	-1.76	-7.06	-8.54	-5.59	-3.82	-5	-2.05	-3.23	-3.23	-1.46	-4.7
	High	Unambiguous	DAGAIAGLNVLR		9.32853e-06	0.000414347	1	27	HORVU1Hr1G072220.4 HORVU1Hr1G072220	1169.66				-1.17		-1.52		-4.59		-1.17	-2.37	-1.86	-2.54	-1.35	-1.17	-3.4	0.54					-2.54							-3.74	-0.15									-1.52
	High	Unambiguous	ATAGDTHLGGEDFDNRMVNHFVQEFK		0.00034028	0.000693743	6	3	HORVU5Hr1G113180.1 HORVU5Hr1G113180; HORVU4Hr1G059390.1 HORVU4Hr1G059390; HORVU3Hr1G086500.1 HORVU3Hr1G086500; HORVU5Hr1G021300.3 HORVU5Hr1G021300; HORVU6Hr1G081460.2 HORVU6Hr1G081460; HORVU1Hr1G072220.4 HORVU1Hr1G072220	2935.34	1.06	2.08	1.23	9.88															7.7					1.74				2.93			9.33
	High	Unambiguous	NDQGNRTTPSYVAFTDTER	1xAcetyl [N-Term]; 2xDeamidated [Q3; N5]	0.000494268	0.000693743	3	38	HORVU4Hr1G059260.3 HORVU4Hr1G059260; HORVU4Hr1G059390.1 HORVU4Hr1G059390; HORVU1Hr1G072220.4 HORVU1Hr1G072220	2215.97		16.04	16.85		14.82		20.5			19.96	18.07			18.47	19.96	18.34			16.58		18.47		17.12	16.98	15.49	15.22		18.34		17.66				16.71	16.85	16.31		18.61
	High	Unambiguous	NALENYAYNMR	1xOxidation [M10]	0.000264675	0.000693743	4	11	HORVU4Hr1G059260.3 HORVU4Hr1G059260; HORVU4Hr1G059390.1 HORVU4Hr1G059390; HORVU3Hr1G086500.1 HORVU3Hr1G086500; HORVU1Hr1G072220.4 HORVU1Hr1G072220	1374.61	1.2	-1.42	2.8			-0.69		1.49				-1.27		5.85		0.33	4.55		1.93		-5.78			-0.69								6.15	-1.57	-0.26	1.64				0.76
	High	Unambiguous	NVLIFDLGGGTFDVSLLTIEEGIFEVK		0.000583005	0.000693743	7	4	HORVU4Hr1G059260.3 HORVU4Hr1G059260; HORVU5Hr1G113180.1 HORVU5Hr1G113180; HORVU4Hr1G059390.1 HORVU4Hr1G059390; HORVU3Hr1G086500.1 HORVU3Hr1G086500; HORVU5Hr1G021300.3 HORVU5Hr1G021300; HORVU6Hr1G081460.2 HORVU6Hr1G081460; HORVU1Hr1G072220.4 HORVU1Hr1G072220	2925.55
	High	Unambiguous	NAVVTVPAYFNDSQR	1xDeamidated [Q/N]	0.000890478	0.00115556	7	30	HORVU4Hr1G059260.3 HORVU4Hr1G059260; HORVU5Hr1G113180.1 HORVU5Hr1G113180; HORVU4Hr1G059390.1 HORVU4Hr1G059390; HORVU3Hr1G086500.1 HORVU3Hr1G086500; HORVU5Hr1G021300.3 HORVU5Hr1G021300; HORVU6Hr1G081460.2 HORVU6Hr1G081460; HORVU1Hr1G072220.4 HORVU1Hr1G072220	1681.82		1.6	0.65	-1.01	0.89	3.39		1.49		1.01	-7.9					-9.5	1.13	-6.11	0.18	0.18	9.33	34.92	-8.97			-8.79	5.41		0.41	-7.9	2.2	-9.86					-9.86		-0.42
	High	Unambiguous	MVQEAER		0.00112852	0.00127704	2	82	HORVU3Hr1G086500.1 HORVU3Hr1G086500; HORVU1Hr1G072220.4 HORVU1Hr1G072220	862.409		2.55			1.62	0.92	0.23	0.46	1.15	-1.16	0.46	0.92	-0.93	-1.63	-0.7	-0.7	-0.93			4.86	-0.24	1.39	-4.64		1.62	-0.47	-19.72	2.31	-0.01	0.92			0.23	0.69	2.31	-1.63	1.85	0.46	1.15
[truncated: 14,794 more rows]
[truncated: 108 more columns]

## Sheet: Table S3
			Cytokinin			Cold			Drought			Heat			Salinity
[truncated: 83 more rows]
